# Supplementary material for: Two different domain architectures generate structural and functional diversity among bZIP genes in the Solanaceae family
Source: Frontiers journal article supplement (doi:10.3389/fpls.2022.967546), 2022-08-19
Supplement: Data_Sheet_2.xlsx [file Data_Sheet_2.xlsx]

## Sheet: Supplementary Table S1
Table S1. List of genomic resources for nine Solanaceae species and Arabidopsis thaliana.
Species	Download site	Genome version	Transcriptome accession number
Arabidopsis thaliana	https://www.arabidopsis.org/index.jsp	TAIR10	SRR2187609, SRR1773569, SRR633727, SRR1773573, SRR1773572, SRR633726, SRR1773570
Petunia inflata	https://solgenomics.net/	v1.0.1	SRR1043177, SRR1043178
Nicotiana benthamiana	ftp://ftp.solgenomics.net/genomes/Nicotiana_benthamiana/	v1.0.1	SRR1043177, SRR1043178
Capsicum annum	http://peppergenome.snu.ac.kr/	v1.6	Data described in Kim, S. et al. Genome sequence of the hot pepper provides insights into the evolution of pungency in Capsicum species. Nat. Genet. 46, 270-278 (2014).
Capsicum chinense	http://peppergenome.snu.ac.kr/	v1.3	Data described in Kim, S. et al. New reference genome sequences of hot pepper reveal the massive evolution of plant disease-resistance genes by retroduplication. Genome Biol. 18, 210 (2017).
Capsicum baccatum	http://peppergenome.snu.ac.kr/	v1.2	Data described in Kim, S. et al. New reference genome sequences of hot pepper reveal the massive evolution of plant disease-resistance genes by retroduplication. Genome Biol. 18, 210 (2017).
Solanum tuberosum	https://phytozome.jgi.doe.gov/pz/portal.html	v6.1	SRR122122, SRR122124, SRR1207290, SRR122109
Solanum lycopersicum	ftp://ftp.solgenomics.net/genomes/Solanum_lycopersicum/	iTAG v3.0	SRR3031978, SRR1514810, SRR3031982
Solanum pennellii	ftp://ftp.solgenomics.net/genomes/Solanum_pennellii	v2.0	SRR2452605,SRR2452586,SRR2452632,SRR2452589,SRR2452596,SRR3119160,SRR2452582,SRR2452614,SRR3119164,SRR2452616,SRR2452619,SRR3119163,SRR2452573,SRR2452584,SRR3119171,SRR2452607,SRR2452578,SRR2452636,SRR2452615,SRR2452575,SRR2452612,SRR2452593,SRR2452626,SRR2452604,SRR2452597,SRR3119156,SRR2452572,SRR2452581,SRR3119170,SRR2452633,SRR2452583,SRR2452622,SRR3119157,SRR2452627,SRR2452634,SRR2452577,SRR…
Solanum pimpinellifolium	https://solgenomics.net	v1.0	SRR2356942,SRR3785063,SRR786421,SRR786517,SRR786586

## Sheet: Supplementary Table S2
Table S2. Data for re-annotated bZIP genes.
No.	Species	Gene ID	Locus ID	Reference ID*	Subgroup	Chromosome	Genomic position	Coding DNA sequences	Protein sequences
1	Arabidopsis thaliana	ATHA_1	AT1G03970.1	AtbZIP40	A	Chr1	1018058-1019247	ATGGCGTCCTTCAAGTTGATGTCTTCTTCCAATTCCGACTTGTCTCGCCGTAATTCTTCTTCTGCTTCATCTTCCCCTTCTATAAGATCATCGCACCATCTCCGACCAAATCCTCACGCCGATCACTCCAGAATCAGTTTCGCTTACGGCGGAGGAGTCAACGATTACACTTTCGCGTCTGATTCAAAGCCCTTCGAGATGGCGATTGATGTTGATCGGAGTATCGGAGATCGGAACAGCGTTAACAACGGAAAGAGTGTTGACGATGTTTGGAAAGAGATTGTATCTGGAGAGCAAAAGACGATCATGATGAAGGAAGAAGAACCAGAAGATATAATGACACTTGAGGATTTCTTAGCGAAAGCAGAAATGGACGAGGGAGCTTCAGATGAAATCGAT…	MASFKLMSSSNSDLSRRNSSSASSSPSIRSSHHLRPNPHADHSRISFAYGGGVNDYTFASDSKPFEMAIDVDRSIGDRNSVNNGKSVDDVWKEIVSGEQKTIMMKEEEPEDIMTLEDFLAKAEMDEGASDEIDVKIPTERLNNDGSYTFDFPMQRHSSFQMVEGSMGGGVTRGKRGRVMMEAMDKAAAQRQKRMIKNRESAARSRERKQAYQVELETLAAKLEEENEQLLKEIEESTKERYKKLMEVLIPVDEKPRPPSRPLSRSHSLEW*
2	Arabidopsis thaliana	ATHA_2	AT1G06070.1	AtbZIP69	I	Chr1	1834829-1837758	ATGGATAAGGAGAAATCTCCTGCACCACCACCTAGTGGAGGTCTTCCTCCACCATCGGGTCGTTACTCTGCGTTTTCACCTAATGGAAGTAGCTTTGCAATGAAAGCTGAATCATCTTTTCCTCCTTTGACTCCAAGTGGAAGCAATAGCTCAGATGCTAACCGATTCAGCCATGATATTAGCCGAATGCCGGATAATCCACCTAAGAACCTAGGCCATCGCCGAGCTCATTCAGAGATTCTTACTCTTCCTGATGACTTAAGCTTTGATAGTGATCTTGGTGTGGTTGGTGCTGCTGATGGACCTTCTTTCTCTGATGATACTGACGAGGACTTACTCTATATGTATCTTGATATGGAAAAATTCAATTCTTCTGCTACATCGACTTCTCAAATGGGT…	MDKEKSPAPPPSGGLPPPSGRYSAFSPNGSSFAMKAESSFPPLTPSGSNSSDANRFSHDISRMPDNPPKNLGHRRAHSEILTLPDDLSFDSDLGVVGAADGPSFSDDTDEDLLYMYLDMEKFNSSATSTSQMGEPSEPTWRNELASTSNLQSTPGSSSERPRIRHQHSQSMDGSTTIKPEMLMSGNEDVSGVDSKKAISAAKLSELALIDPKRAKRIWANRQSAARSKERKMRYIAELERKVQTLQTEATSLSAQLTLLQRDTNGLGVENNELKLRVQTMEQQVHLQDALNDALKEEVQHLKVLTGQGPSNGTSMNYGSFGSNQQFYPNNQSMHTILAAQQLQQLQIQSQKQQQQQQQHQQQQQQQQQQFHFQQQQLYQLQQQQRLQQQEQQSGASELR…
3	Arabidopsis thaliana	ATHA_3	AT1G06850.2	AtbZIP52	I	Chr1	2105055-2106008	ATGGAGAAATCAGATCCTCCACCAGTCCCAAAGCCCGGCGCCACTATTATCCCCTCCTCCGATCCAATTCCTAATGCCGATCCGATTCCATCTTCTTCCTTCCACCGCCGATCTCGCTCCGACGATATGTCCATGTTCATGTTCATGGATCCCCTCTCCTCCGCCGCACCACCTTCCTCCGACGACCTTCCCTCCGACGACGATCTCTTCTCTTCTTTCATCGATGTCGATAGCCTCACCTCTAATCCCAATCCCTTTCAAAATCCTTCCCTCTCCTCCAACTCCGTTTCCGGCGCTGCTAATCCTCCTCCTCCTCCTTCCTCTCGTCCTCGCCACCGTCACAGCAATTCCGTTGACGCTGGATGCGCCATGTATGCCGGTGATATCATGGACGCTAAG…	MEKSDPPPVPKPGATIIPSSDPIPNADPIPSSSFHRRSRSDDMSMFMFMDPLSSAAPPSSDDLPSDDDLFSSFIDVDSLTSNPNPFQNPSLSSNSVSGAANPPPPPSSRPRHRHSNSVDAGCAMYAGDIMDAKKAMPPEKLSELWNIDPKRAKRILANRQSAARSKERKARYIQELERKVQSLQTEATTLSAQLTLYQVSIFGDSSFDPNRIGKFFPLFYIHRQILISMLF*
4	Arabidopsis thaliana	ATHA_4	AT1G08320.5	AtbZIP21	D	Chr1	2621904-2626212	ATGAGTAGCAAACATCATCTCATGCTTCAACCTCATCATAATAACATGGCAAACTCAAGTTCAACATCTGGACTTCCTTCCACTTCTCGAACTTTAGCTCCTCCTAAACCTTCGGAAGATAAGAGGAAGGCTACAACTTCAGGCAAACAGCTTGATGCTAAGACGTTGAGACGTTTGGCCCAAAATAGAGAAGCTGCTCGCAAAAGCCGTCTTAGGAAAAAGGCGTATGTGCAACAGCTAGAATCAAGTAGGATAAAGCTTTCCCAATTGGAGCAAGAACTTCAGCGAGCTCGTTCTCAGGGGCTGTTCATGGGTGGTTGTGGACCACCAGGACCTAACATCACTTCCGGAGCTGCAATATTTGACATGGAATATGGGAGATGGCTAGAGGATGATAAC…	MSSKHHLMLQPHHNNMANSSSTSGLPSTSRTLAPPKPSEDKRKATTSGKQLDAKTLRRLAQNREAARKSRLRKKAYVQQLESSRIKLSQLEQELQRARSQGLFMGGCGPPGPNITSGAAIFDMEYGRWLEDDNRHMSEIRTGLQAHLSDNDLRLIVDGYIAHFDEIFRLKAVAAKADVFHLIIGTWMSPAERCFIWMAGFRPSDLIKILVSQMDLLTEQQLMGIYSLQHSSQQAEEALSQGLEQLQQSLIDTLAASPVIDGMQQMAVALGKISNLEGFIRQADNLRQQTVHQLRRILTVRQAARCFLVIGEYYGRLRALSSLWLSRPRETLMSDETSCQTTTDLQIVQSSRNHFSNF*
5	Arabidopsis thaliana	ATHA_5	AT1G13600.1	AtbZIP58	S	Chr1	4650606-4651549	ATGAACACGATTCCAGCCGAACTCACTGGATACTTCCACTATCTACCACCAGATAAATATAATAACCAAACACCAATCATGGAGTCTGAGTACTTCAACATGCCCTCTTCTCCTACTTCTTGTTCCTCCTTCTACCACCTCAATGGTCTGATCAACAACAACAACTACTCTTCATCATCCAATGGTCAGGATCTAATGACGAGCAACAACTCAACTTCAGACGAAGATCACCAACAAAGTATGGTCATCGATGAGAGGAAACAAAGGAGAATGATCTCTAACAGGGAATCTGCTCGTAGGTCAAGAATGAGAAAGCAGAGACATCTCGATGAGCTTTGGTCTCAAGTGATAAGACTTCGCACTGATAACCACTGTCTTATGGATAAGCTGAACCGCGTA…	MNTIPAELTGYFHYLPPDKYNNQTPIMESEYFNMPSSPTSCSSFYHLNGLINNNNYSSSSNGQDLMTSNNSTSDEDHQQSMVIDERKQRRMISNRESARRSRMRKQRHLDELWSQVIRLRTDNHCLMDKLNRVSESHELALKENAKLKEETSDLRQLISEIKSHNEDDNSFLRELEDSISNSRSDSNQSGRDFELC*
6	Arabidopsis thaliana	ATHA_6	AT1G19490.1	AtbZIP62	J	Chr1	6751544-6754073	ATGGAGTTGGAGCCTATATCATCGAGTTGTTGCTCGTCGTCTTCTTCTTCTTCTGGGGAGGAGAATACTGCGGCGGCGAACATGACGGAGATGGAGGCGGCAGAAGCATTGGCGGATTTAGCGCAGCTTGCGATAATGCGAGAGCAGGTTTTCGAATCTGCAGCGAGTTGGGGAAGTAAAGGGAAACGGGTGAGGAAGCGAGTCAAGACTGAGTCTCCTCCTTCTGACTCGCTTTTGAAACCACCTGACTCTGATACGTTACCTACTCCGGATCTAGCTGAGGAACGATTAGTGAAAGAAGAAGAGGAAGAAGAAGAAGTTGAACCAATAACTAAAGAACTAACTAAAGCTCCGGTTAAATCTGAAATCAATGGTGAAACACCTAAACCAATTCTTGCT…	MELEPISSSCCSSSSSSSGEENTAAANMTEMEAAEALADLAQLAIMREQVFESAASWGSKGKRVRKRVKTESPPSDSLLKPPDSDTLPTPDLAEERLVKEEEEEEEVEPITKELTKAPVKSEINGETPKPILASTLIRCSRSNGCGRSRQNLSEAEREERRIRRILANRESARQTIRRRQAMCEELSKKAADLTYENENLRREKDWALKEFQSLETINKHLKEQVLKSVKPDTKEPEESPKPSQVEMSTSSTPFYFYNQNPYQLFCWPHVTQSSNPMISPLEFPTSGGASAKTITTQEHENAADDNGQKTHFYVVPCPWFLPPPDHSNGVPFGLQDTQRGTFSNGHHIDDSSARPMDVTETPRSHLPTRIKEEDSGSPETRPLYDLNESATEVLSEGGD…
7	Arabidopsis thaliana	ATHA_7	AT1G22070.1	AtbZIP22	D	Chr1	7789133-7792139	ATGGAGATGATGAGCTCTTCTTCTTCTACTACTCAAGTTGTATCATTCAGAGACATGGGGATGTATGAACCATTTCAACAGTTATCTGGTTGGGAGAGTCCTTTCAAATCAGATATCAACAATATTACTAGTAATCAGAATAACAATCAGAGTTCTTCAACAACACTTGAGGTTGATGCTAGACCAGAAGCAGATGATAACAATAGAGTGAATTATACTTCTGTGTATAATAACTCTCTTGAAGCAGAACCGTCGAGTAATAATGATCAGGACGAAGACCGGATCAATGATAAGATGAAACGGCGTTTGGCTCAGAACCGAGAAGCTGCTCGCAAAAGTCGTTTGAGAAAGAAGGCCCATGTTCAACAGTTAGAAGAAAGCCGGTTGAAGTTGTCACAG…	MEMMSSSSSTTQVVSFRDMGMYEPFQQLSGWESPFKSDINNITSNQNNNQSSSTTLEVDARPEADDNNRVNYTSVYNNSLEAEPSSNNDQDEDRINDKMKRRLAQNREAARKSRLRKKAHVQQLEESRLKLSQLEQELVRARQQGLCVRNSSDTSYLGPAGNMNSGIAAFEMEYTHWLEEQNRRVSEIRTALQAHIGDIELKMLVDSCLNHYANLFRMKADAAKADVFFLMSGMWRTSTERFFQWIGGFRPSELLNVVMPYVEPLTDQQLLEVRNLQQSSQQAEEALSQGLDKLQQGLVESIAIQIKVVESVNHGAPMASAMENLQALESFVNQADHLRQQTLQQMSKILTTRQAARGLLALGEYFHRLRALSSLWAARPREHT*
8	Arabidopsis thaliana	ATHA_8	ATHA_bZIP.Chr1.1	X	St	Chr1	10798367-10800744	ATGATGGCTCATCACTCCATGGACGATAGAGACTCTCCTGATAAAGGATTTGATTCCGGCAAGTACGTTAGATACACGCCGGAACAAGTTGAAGCTCTTGAGAGAGTTTATGCTGAGTGTCCTAAACCTAGCTCTCTGAGAAGACAACAGCTTATTCGTGAATGTCCCATTCTCTGTAACATCGAGCCTCGACAGATCAAAGTTTGGTTCCAGAATCGCAGATGTCGAGAGAAGCAGAGGAAAGAGTCAGCTCGTCTTCAGACAGTGAACAGGAAGCTGAGTGCTATGAACAAGCTTTTGATGGAAGAGAATGATCGTTTGCAGAAGCAAGTCTCCAACTTGGTTTATGAGAATGGATTCATGAAACATCGAATCCACACTGCTTCTGGGACGACCACA…	MMAHHSMDDRDSPDKGFDSGKYVRYTPEQVEALERVYAECPKPSSLRRQQLIRECPILCNIEPRQIKVWFQNRRCREKQRKESARLQTVNRKLSAMNKLLMEENDRLQKQVSNLVYENGFMKHRIHTASGTTTDNSCESVVVSGQQRQQQNPTHQHPQRDVNNPANLLSIAEETLAEFLCKATGTAVDWVQMIGMKPGPDSIGIVAVSRNCSGIAARACGLVSLEPMKVAEILKDRPSWFRDCRCVETLNVIPTGNGGTIELVNTQIYAPTTLAAARDFWTLRYSTSLEDGSYVVCERSLTSATGGPNGPLSSSFVRAKMLSSGFLIRPCDGGGSIIHIVDHVDLDVSSVPEVLRPLYESSKILAQKMTVAALRHVRQIAQETSGEV
9	Arabidopsis thaliana	ATHA_9	AT1G32150.1	AtbZIP68	G	Chr1	11565494-11568645	ATGGGTAGCAGTGAGATGGAAAAATCAGGTAAAGAGAAAGAACCTAAGACTACACCGCCTTCGACTTCTTCATCTGCTCCTGCTACTGTTGTTTCACAGGAACCTTCTTCTGCTGTGAGTGCTGGAGTGGCTGTTACTCAAGATTGGTCTGGCTTCCAGGCTTATTCTCCTATGCCGCCTCATGGTTATGTAGCATCAAGTCCTCAACCTCATCCTTATATGTGGGGCGTTCAGCATATGATGCCGCCTTATGGAACACCGCCTCATCCGTATGTTACGATGTATCCTCCAGGTGGCATGTATGCTCATCCTTCATTACCTCCGGGGTCTTATCCATATAGTCCCTATGCAATGCCTTCTCCTAATGGAATGGCTGAAGCTTCTGGTAATACTGGAAGT…	MGSSEMEKSGKEKEPKTTPPSTSSSAPATVVSQEPSSAVSAGVAVTQDWSGFQAYSPMPPHGYVASSPQPHPYMWGVQHMMPPYGTPPHPYVTMYPPGGMYAHPSLPPGSYPYSPYAMPSPNGMAEASGNTGSVIEGDGKPSDGKEKLPIKRSKGSLGSLNMIIGKNNEAGKNSGASANGACSKSAESGSDGSSDGSDANSQNDSGSRHNGKDGETASESGGSAHGPPRNGSNLPVNQTVAIMPVSATGVPGPPTNLNIGMDYWSGHGNVSGAVPGVVVDGSQSQPWLQVSDEREIKRQRRKQSNRESARRSRLRKQAECDELAQRAEVLNGENSSLRAEINKLKSQYEELLAENSSLKNKFSSAPSLEGGDLDKNEQEPQRSTRQDVA*
10	Arabidopsis thaliana	ATHA_10	AT1G35490.2	AtbZIP77	E	Chr1	13061638-13063450	ATGGAAAATTTAAGGAGGTTGTCAAACCCGGGAAATTTCGGATTCATTGGAAGATCACAATCACGAGTTCCCCAAAAAAACATGGAAAATAACATTTCTCCTCCTAATAATATGCACCACCATAGTGCTTCTTTAGATGATCTTTTCACAGAAGACCAACCAGCTTGGCTCGATGAGCTCCTAAGTGAGCCAGCATCACCTAAGATTAACAAAGGTCATAGACGTTCAGCTAGTGACACAGCTGCTTACTTGAACTCAGCTTTAATGCCTTCGAAGGAAAATCATGTTGCTGGTTCGTCTTGGCAGTTCCAGAACTATGATTTGTGGCAGTCCAACTCTTATGAACAACACAATAAATTAGGATGGGATTTCTCTACAGCAAATGGAACTAATATCCAA…	MENLRRLSNPGNFGFIGRSQSRVPQKNMENNISPPNNMHHHSASLDDLFTEDQPAWLDELLSEPASPKINKGHRRSASDTAAYLNSALMPSKENHVAGSSWQFQNYDLWQSNSYEQHNKLGWDFSTANGTNIQRNMSCGALNMSSKPIEKHVSKMKEGTSTKPDGPRSKTDSKRIKHQNAHRARLRRLEYISDLERTIQVLQVEGCEMSSAIHYLDQQLLMLSMENRALKQRMDSLAEIQKLKHVEQQLLEREIGNLQFRRHQQQPQQNQKQVQAIQNRYNKYQPPVTQEPDAQFAALAI*
11	Arabidopsis thaliana	ATHA_11	AT1G42990.1	AtbZIP60	K	Chr1	16135723-16137463	ATGGCGGAGGAATTTGGAAGCATAGATTTACTCGGAGATGAAGATTTCTTCTTCGATTTCGATCCTTCAATCGTAATTGATTCTCTTCCGGCGGAGGATTTTCTTCAGTCTTCACCGGATTCATGGATCGGAGAAATCGAGAATCAATTGATGAACGATGAGAATCATCAAGAGGAGAGTTTTGTGGAATTGGATCAGCAATCGGTTTCAGATTTCATAGCGGATCTACTCGTTGATTATCCAACTAGCGATTCTGGCTCCGTTGATTTGGCGGCTGATAAAGTTCTAACCGTCGATTCTCCCGCCGCCGCTGATGATTCCGGGAAGGAGAATTCGGATTTGGTTGTTGAGAAGAAGTCTAATGATTCTGGTAGCGAGATTCATGATGATGATGACGAA…	MAEEFGSIDLLGDEDFFFDFDPSIVIDSLPAEDFLQSSPDSWIGEIENQLMNDENHQEESFVELDQQSVSDFIADLLVDYPTSDSGSVDLAADKVLTVDSPAAADDSGKENSDLVVEKKSNDSGSEIHDDDDEEGDDDAVAKKRRRRVRNRDAAVRSRERKKEYVQDLEKKSKYLERECLRLGRMLECFVAENQSLRYCLQKGNGNNTTMMSKQESAVLLLESLLLGSLLWLLGVNFICLFPYMSHTKCCLLRPEPEKLVLNGLGSSSKPSYTGVSRRCKGSRPRMKYQILTLAA*
12	Arabidopsis thaliana	ATHA_12	AT1G43700.1	AtbZIP51	I	Chr1	16484231-16486327	ATGGAAGGAGGAGGAAGAGGACCAAATCAAACGATTCTCAGTGAAATAGAACATATGCCTGAAGCTCCACGTCAACGTATCTCTCATCACCGTCGAGCTCGCTCTGAAACCTTCTTCTCCGGCGAATCAATCGACGATCTCCTCTTATTCGATCCTTCCGATATCGATTTCTCTTCTCTAGACTTCCTCAACGCTCCACCACCACCACAACAATCACAACAACAACCGCAAGCTTCTCCCATGTCCGTTGATTCGGAAGAAACCTCATCGAACGGTGTTGTTCCTCCTAATTCTCTTCCTCCAAAACCCGAAGCTAGATTCGGTCGCCATGTTCGTAGCTTCTCGGTTGATTCCGATTTCTTCGATGATTTGGGTGTTACTGAGGAGAAGTTTATAGCT…	MEGGGRGPNQTILSEIEHMPEAPRQRISHHRRARSETFFSGESIDDLLLFDPSDIDFSSLDFLNAPPPPQQSQQQPQASPMSVDSEETSSNGVVPPNSLPPKPEARFGRHVRSFSVDSDFFDDLGVTEEKFIATSSGEKKKGNHHHSRSNSMDGEMSSASFNIESILASVSGKDSGKKNMGMGGDRLAELALLDPKRAKRILANRQSAARSKERKIRYTGELERKVQTLQNEATTLSAQVTMLQRGTSELNTENKHLKMRLQALEQQAELRDALNEALRDELNRLKVVAGEIPQGNGNSYNRAQFSSQQSAMNQFGNKTNQQMSTNGQPSLPSYMDFTKRG*
13	Arabidopsis thaliana	ATHA_13	AT1G45249.6	AtbZIP36	A	Chr1	17165125-17167741	ATGGTTCAGATCCAGTTATTAGGTGGAAGCAGATTTTGTAGAAAAATGGATGGTAGTATGAATTTGGGGAATGAGCCACCAGGAGATGGTGGTGGAGGTGGAGGGTTGACTAGACAAGGTTCGATATACTCGTTGACGTTTGATGAGTTTCAGAGCAGTGTAGGGAAAGATTTTGGGTCAATGAACATGGATGAGTTGTTAAAGAATATATGGAGTGCTGAAGAAACACAAGCCATGGCTAGTGGTGTGGTTCCAGTTCTTGGTGGAGGTCAAGAGGGTTTGCAGCTGCAGAGGCAAGGCTCGTTGACTCTGCCTCGAACGCTTAGTCAGAAGACGGTTGATCAAGTTTGGAAAGATCTATCCAAAGTTGGAAGTAGTGGAGTAGGGGGAAGTAACTTG…	MVQIQLLGGSRFCRKMDGSMNLGNEPPGDGGGGGGLTRQGSIYSLTFDEFQSSVGKDFGSMNMDELLKNIWSAEETQAMASGVVPVLGGGQEGLQLQRQGSLTLPRTLSQKTVDQVWKDLSKVGSSGVGGSNLSQVAQAQSQSQSQRQQTLGEVTLEEFLVRAGVVREEAQVAARAQIAENNKGGYFGNDANTGFSVEFQQPSPRVVAAGVMGNLGAETANSLQVQGSSLPLNVNGARTTYQQSQQQQPIMPKQPGFGYGTQMGQLNSPGIRGGGLVGLGDQSLTNNVGFVQGASAAIPGALGVGAVSPVTPLSSEGIGKSNGDSSSLSPSPYMFNGGVRGRKSGTVEKVVERRQRRMIKNRESAARSRARKQAYTVELEAEVAKLKEENDELQRKQAR…
14	Arabidopsis thaliana	ATHA_14	AT1G49720.3	AtbZIP35	A	Chr1	18400066-18402354	ATGGGTACTCACATTGATATCAACAACTTAGGCGGCGATACTTCTAGAGGGAATGAGTCAAAGCCATTGGCGAGGCAGTCTTCGTTATATTCCTTAACGTTTGATGAGCTTCAGAGCACATTAGGTGAGCCGGGGAAAGATTTTGGGTCTATGAATATGGATGAGTTACTCAAGAACATATGGACTGCTGAGGATACTCAAGCCTTTATGACTACTACATCTTCGGTTGCAGCCCCGGGACCTAGTGGTTTTGTTCCGGGAGGAAATGGTTTACAGAGGCAAGGCTCCTTGACCTTGCCTAGAACGCTTAGTCAGAAGACTGTCGATGAAGTCTGGAAATACCTGAATTCGAAAGAAGGTAGTAATGGGAATACTGGAACGGATGCGCTTGAGAGGCAA…	MGTHIDINNLGGDTSRGNESKPLARQSSLYSLTFDELQSTLGEPGKDFGSMNMDELLKNIWTAEDTQAFMTTTSSVAAPGPSGFVPGGNGLQRQGSLTLPRTLSQKTVDEVWKYLNSKEGSNGNTGTDALERQQTLGEMTLEDFLLRAGVVKEDNTQQNENSSSGFYANNGAAGLEFGFGQPNQNSISFNGNNSSMIMNQAPGLGLKVGGTMQQQQQPHQQQLQQPHQRLPPTIFPKQANVTFAAPVNMVNRGLFETSADGPANSNMGGAGGTVTATSPGTSSAENNTWSSPVPYVFGRGRRSNTGLEKVVERRQKRMIKNRESAARSRARKQAYTLELEAEIESLKLVNQDLQKKQAEIMKTHNSELKEFSKQPPLLAKRQCLRRTLTGPW*
15	Arabidopsis thaliana	ATHA_15	AT1G52150.3	X	St	Chr1	19409688-19414764	ATGGCAATGTCTTGCAAGGATGGTAAGTTGGGATGTTTGGATAATGGGAAGTATGTGAGGTATACACCTGAACAAGTTGAAGCACTTGAGAGGCTTTATCATGACTGTCCTAAACCGAGTTCTATTCGCCGTCAGCAGTTGATCAGAGAGTGTCCTATTCTCTCTAACATTGAGCCTAAACAGATCAAAGTGTGGTTTCAGAACCGAAGATGTAGAGAGAAACAAAGGAAAGAGGCTTCACGGCTTCAAGCTGTGAATCGGAAGTTGACGGCAATGAACAAGCTCTTGATGGAGGAGAATGACAGGTTGCAGAAGCAAGTGTCACAGCTGGTCCATGAAAACAGCTACTTCCGTCAACATACTCCAAATCCTTCACTCCCAGCTAAAGACACAAGCTGT…	MAMSCKDGKLGCLDNGKYVRYTPEQVEALERLYHDCPKPSSIRRQQLIRECPILSNIEPKQIKVWFQNRRCREKQRKEASRLQAVNRKLTAMNKLLMEENDRLQKQVSQLVHENSYFRQHTPNPSLPAKDTSCESVVTSGQHQLASQNPQRDASPAGLLSIAEETLAEFLSKATGTAVEWVQMPGMKPGPDSIGIIAISHGCTGVAARACGLVGLEPTRVAEIVKDRPSWFRECRAVEVMNVLPTANGGTVELLYMQLYAPTTLAPPRDFWLLRYTSVLEDGSLVVCERSLKSTQNGPSMPLVQNFVRAEMLSSGYLIRPCDGGGSIIHIVDHMDLEACSVPEVLRPLYESPKVLAQKTTMAALRQLKQIAQEVTQTNSSVNGWGRRPAALRALSQRLS…
16	Arabidopsis thaliana	ATHA_16	AT1G58110.1	AtbZIP76	E	Chr1	21515474-21518016	ATGGCTAGCTCCAAGGGATCACAGAGTGTTAGAAACTTGATGTACCCGGGAAAGCATGCTTTGCTCCCACCAAAAATACCGTTTCCTAGTGTATCAGCATCGTATTCCGAGTATATTCCTACTGGTTTGATTGGTTCAAGACATGGTCAGAAGCTTAGTAATGAGAAAACACATCACCAGCGAACTTCCTCCGAGAGCCATTTGGTAGAAGAGCTTCCCTTTTGGCTTGATGATCTTCTCAATGAGCAGCCGGAAAGCCCTGCTCGAAAATGTGGTCATCGGCGTTCATCAAGTGACTCTTACGCTTATCTAGATGTGGCTAATGCTACAAACATAAGTTTGACTCTCCAAAATGATTTCAGTTATAGGAATACTGTTTTATCCACTCAAAGAGGAGTC…	MASSKGSQSVRNLMYPGKHALLPPKIPFPSVSASYSEYIPTGLIGSRHGQKLSNEKTHHQRTSSESHLVEELPFWLDDLLNEQPESPARKCGHRRSSSDSYAYLDVANATNISLTLQNDFSYRNTVLSTQRGVQELDRNKNAQDAAFYSGASFLKQKSRQRDSLVATGACPSWLPFARENGGGKNLGALYMSQDATVISSERKNYAEPFSHDPKMLSSEENNSNPSPVTYEADNTKRAKQQFAQRSRVRKLQYISELERNVQTLQAEGSKVSAELDFLNQRNLILSMENKALKKRLESIAQEKLIKQLEQEVLEKEIGRLRALYQQQQQTQKPSASRGRATSKDLDSQFSSLSLNTKDSNCRRDSVSVMGQFHF*
17	Arabidopsis thaliana	ATHA_17	AT1G59530.1	AtbZIP04	S	Chr1	21868190-21868708	ATGTTTTATACTAATATGGAGACGGTTCATAACTGCTTCAATGATGCTACGATAACCGGTGATGAAATCATTGATATATTGGCGTTTCTTCAATCAGACGAGTCGGACAATCCAAGCGGTATAAACGAGGTAGTACCGGTGGATGATAAGAAGAGAAGACGGACGATATCAAACCGGGAATCGGCCAAGAGATCGAGGATGAAAAAGAAGAAACGTTTTGAAGAGTTAACTGAAGAGGTGAACCGGTTAAACATAAGAAATCAGGAGCTGAAAAACCGGTTAGCTAATGTTGTTAGTTGTGGTAATTTTATATCTAGGGAGAATAACCGGTTGAAAACCGAATCGGTTTGCCTTGAGATAAGGCTTTTAGAGTTGTACCGTTTTTTAGTGGCCATGCAA…	MFYTNMETVHNCFNDATITGDEIIDILAFLQSDESDNPSGINEVVPVDDKKRRRTISNRESAKRSRMKKKKRFEELTEEVNRLNIRNQELKNRLANVVSCGNFISRENNRLKTESVCLEIRLLELYRFLVAMQSPISTSVNYITTLEI*
18	Arabidopsis thaliana	ATHA_18	AT1G68640.1	AtbZIP46	D	Chr1	25769576-25772650	ATGCAGAGCAGCTTCAAAACCGTTCCTTTCACTCCTGATTTCTACTCTCAGTCTTCTTACTTCTTCAGAGGAGATAGTTGTCTTGAGGAGTTTCATCAACCAGTCAATGGTTTTCACCATGAAGAAGCTATCGATTTAAGTCCAAATGTCACTATTGCTTCAGCTAACTTACACTACACGACGTTTGATACGGTTATGGATTGTGGTGGTGGTGGTGGTGGTGGCTTGAGGGAGAGACTTGAAGGAGGAGAAGAGGAGTGTTTGGACACAGGGCAACTAGTGTACCAGAAAGGGACAAGATTAGTAGGAGGAGGAGTAGGAGAAGTGAACAGCAGTTGGTGTGATTCGGTTTCAGCTATGGCTGATAACAGTCAACATACTGACACTTCCACAGATATT…	MQSSFKTVPFTPDFYSQSSYFFRGDSCLEEFHQPVNGFHHEEAIDLSPNVTIASANLHYTTFDTVMDCGGGGGGGLRERLEGGEEECLDTGQLVYQKGTRLVGGGVGEVNSSWCDSVSAMADNSQHTDTSTDIDTDDKTQLNGGHQGMLLATNCSDQSNVKSSDQRTLRRLAQNREAARKSRLRKKAYVQQLENSRIRLAQLEEELKRARQQGSLVERGVSADHTHLAAGNGVFSFELEYTRWKEEHQRMINDLRSGVNSQLGDNDLRVLVDAVMSHYDEIFRLKGIGTKVDVFHMLSGMWKTPAERFFMWLGGFRSSELLKILGNHVDPLTDQQLIGICNLQQSSQQAEDALSQGMEALQQSLLETLSSASMGPNSSANVADYMGHMAMAMGKLGTLE…
19	Arabidopsis thaliana	ATHA_19	AT1G68880.1	AtbZIP08	S	Chr1	25893971-25895056	ATGGCTGGTTCTGTCTATAACCTTCCAAGTCAAAACCCTAATCCACAGTCTTTATTCCAAATCTTTGTTGATCGAGTACCACTTTCAAACTTGCCTGCCACGTCAGACGACTCTAGCCGGACTGCAGAAGATAATGAGAGGAAGCGGAGAAGGAAGGTATCGAACCGCGAGTCAGCTCGGAGATCGCGTATGCGGAAACAGCGTCACATGGAAGAACTGTGGTCCATGCTTGTTCAACTCATCAATAAGAACAAATCTCTAGTCGATGAGCTAAGCCAAGCCAGGGAATGTTACGAGAAGGTTATAGAAGAGAACATGAAACTTCGAGAGGAAAACTCCAAGTCGAGGAAGATGATTGGTGAGATCGGGCTTAATAGGTTTCTTAGCGTAGAGGCCGAT…	MAGSVYNLPSQNPNPQSLFQIFVDRVPLSNLPATSDDSSRTAEDNERKRRRKVSNRESARRSRMRKQRHMEELWSMLVQLINKNKSLVDELSQARECYEKVIEENMKLREENSKSRKMIGEIGLNRFLSVEADQIWTF*
20	Arabidopsis thaliana	ATHA_20	AT1G75390.2	AtbZIP44	S	Chr1	28291698-28293008	ATGAATAATAAAACTGAAATGGGATCTTCCACAAGTGGAAATTGCTCGTCGGTTTCAACCACTGGTTTAGCTAACTCCGGTTCAGAATCTGATCTCCGGCAACGTGATCTAATCGACGAGCGGAAGAGAAAGAGGAAACAGTCGAACAGAGAATCTGCGAGGAGGTCGAGGATGAGGAAGCAGAAGCATTTGGATGATCTCACTGCTCAGGTGACTCATCTACGTAAAGAAAACGCTCAGATCGTCGCCGGAATCGCCGTCACGACGCAGCACTACGTCACTATCGAGGCGGAGAACGACATTCTCAGAGCTCAGGATTCGGTATGGAGACCGGTCAGGGATTATTCGACGGTGGATTATTCGACGGCGTGA	MNNKTEMGSSTSGNCSSVSTTGLANSGSESDLRQRDLIDERKRKRKQSNRESARRSRMRKQKHLDDLTAQVTHLRKENAQIVAGIAVTTQHYVTIEAENDILRAQDSVWRPVRDYSTVDYSTA*
21	Arabidopsis thaliana	ATHA_21	AT1G77920.1	AtbZIP50	D	Chr1	29298243-29300945	ATGATGAGTTCTTCTTCTCCAACACAACTTGCATCTTTAAGAGACATGGGAATCTATGAGCCATTTCAACAAATTGTCGGTTGGGGAAATGTTTTCAAATCTGATATCAATGATCATAGTCCCAATACTGCTACTTCCTCTATTATTCAGGTTGATCCTAGAATTGATGATCACAACAACAACATCAAGATAAATTATGATTCTTCTCATAACCAGATCGAAGCAGAACAACCTTCTAGTAATGATAATCAAGATGATGATGGCAGGATTCATGATAAGATGAAACGGCGTTTAGCGCAGAACCGAGAAGCGGCTCGCAAAAGTCGTTTGAGAAAGAAGGCTTATGTTCAGCAGTTAGAGGAAAGCCGGTTAAAGTTATCGCAGTTAGAGCAAGAACTC…	MMSSSSPTQLASLRDMGIYEPFQQIVGWGNVFKSDINDHSPNTATSSIIQVDPRIDDHNNNIKINYDSSHNQIEAEQPSSNDNQDDDGRIHDKMKRRLAQNREAARKSRLRKKAYVQQLEESRLKLSQLEQELEKVKQQGHLGPSGSINTGIASFEMEYSHWLQEQSRRVSELRTALQSHISDIELKMLVESCLNHYANLFQMKSDAAKADVFYLISGMWRTSTERFFQWIGGFRPSELLNVVMPYLQPLTDQQILEVRNLQQSSQQAEDALSQGIDKLQQSLAESIVIDAVIESTHYPTHMAAAIENLQALEGFVNQADHLRQQTLQQMAKILTTRQSARGLLALGEYLHRLRALSSLWAARPQEPT*
22	Arabidopsis thaliana	ATHA_22	AT2G04038.1	AtbZIP48	S	Chr2	1331919-1332419	ATGATTCCGGCAGAAATCAACGGATATTTCCAATATCTATCACCGGAATACAACGTAATAAACATGCCTTCATCTCCAACCTCTTCCTTAAACTACCTAAACGATTTGATCATCAACAACAACAACTATTCCTCATCATCCAACAGTCAAGATCTCATGATAAGCAACAACTCAACTTCCGACGAAGATCATCATCAAAGCATCATGGTACTCGACGAGAGGAAACAGAGAAGGATGCTTTCGAACAGAGAATCTGCAAGGAGGTCAAGGATGAGGAAACAGAGACATCTTGATGAACTCTGGTCTCAGGTAATAAGGCTTCGCAACGAGAACAACTGTCTTATCGATAAGCTGAACCGCGTATCGGAGACTCAAAATTGTGTATTGAAGGAGAACTCT…	MIPAEINGYFQYLSPEYNVINMPSSPTSSLNYLNDLIINNNNYSSSSNSQDLMISNNSTSDEDHHQSIMVLDERKQRRMLSNRESARRSRMRKQRHLDELWSQVIRLRNENNCLIDKLNRVSETQNCVLKENSKLKEEASDLRQLVCELKSNKNNNNSFPREFEDN*
23	Arabidopsis thaliana	ATHA_23	AT2G12900.1	AtbZIP33	I	Chr2	5293897-5295480	ATGAATGGATCCGACAATATCACTACTCCTTCCGGATCACGGTCTATGACTCAGCCTTCACTTGCCTCCTCCTCCTTGCCCCCATTGAGCCCTTCTTCGTCAACATTCCGTCGCAATTCATTACCATCGATGAGCTTTTCTCCGTCAGCTCCTGTGGAGAGTAGAGACTCTTCCATTAAGGTTAATAAAAATCCTTCATTGCCCCCTTTGGTTGATGGAGAAGAGGATGCTTCCTGGCTCGAGTTTGGTAGCAGTGATTATACTGATGATGAATTGAATAAGATTGCAAAGAGTACCAAACTTCAAGATATTGCAAAGAGTACCAAACTTCAAGAGATTGTATCTGATCCTAAGAAAGTCAGAAGAATCTTGAAAAATCGAGAGTTAGCCGCATCTTCA…	MNGSDNITTPSGSRSMTQPSLASSSLPPLSPSSSTFRRNSLPSMSFSPSAPVESRDSSIKVNKNPSLPPLVDGEEDASWLEFGSSDYTDDELNKIAKSTKLQDIAKSTKLQEIVSDPKKVRRILKNRELAASSKQRKLKYMIDLEHRIKFLENKNALIFEKIKLLEKDKTILMNEKKEITIQIESLEQQAQLRDALTEKLHVEIERLKVITISNEKGSVELQRLKMETCEVLQYRREFDRSNMQGMDPNMFTWSQPNLGFYGQI*
24	Arabidopsis thaliana	ATHA_24	AT2G12940.1	AtbZIP32	I	Chr2	5317475-5319090	ATGAATGGATCCGACAATACCACTCCGTCCCGACCATGGTCGATAACTCAGCCTTCACTTGCCTTCTCCTCCTTGCCCCCATTGAGCCCTTCTCCGTCGTCATCCCGTCGCAATTCATTACCATTGATGAATCCGTCAACTTCTATGGAGAGTAGAGACTCTTCCATGAGGTTTAAGAAAAACTCTTTATTGCCTCCTTTGGGTGTGAAGAAAATAGCACCCAAAGATATTGGACCCCTAAAGAGACACTACAGGAGTGTTTCAATGGATAGTTGTTTGAGTGACTTACTGAAGCTAACTCCTTCTCCGGGTAACACTCCATCTTCAAGATTGGTTGATGGAGACCAGAATGCTTCCAGGCTAGAGTTTGATGCCAATGATTATACTGATGATGAATTG…	MNGSDNTTPSRPWSITQPSLAFSSLPPLSPSPSSSRRNSLPLMNPSTSMESRDSSMRFKKNSLLPPLGVKKIAPKDIGPLKRHYRSVSMDSCLSDLLKLTPSPGNTPSSRLVDGDQNASRLEFDANDYTDDELNKIAKSNKLKEVALDPKEVRRILKNRESAAHLKQKKLQYMINLEHRINFVENENASIFEKIKLLENDKTMMMNEKKEIMIRIESMEIQAQLRDVLTEHLHGESERLKAALISNENGNGKVQKLRMATCEVLQNRHEFDKSNMEVMDSNMINWSQPNPGFNG*
25	Arabidopsis thaliana	ATHA_25	ATHA_bZIP.Chr2.1	X	I	Chr2	5401088-5402085	ATGAATGGATCGGACAATTTCACTTCTCCTTCCGGACCACGGTCTATGACTCAGCCTTCATTTGCCTTCTCTTCCTTGCCCCCGTTGAGCCCTTCTCCGTCGTTATCCCGTCGCAATTCATTACCATTGATGAACCTTTCTCCCTCAGCTCCTGTAGAGAGTAGAGAATCTTCCATTAAGGTTAAGAAAAACCTTACATTGCCTCCTTTGGGTGTGAAAAGAAGAGTAGCCAAAGACATTGCACATTTAAATAGACATTACATGAGTGTTTCATTGGATAGTTGTTTACATGACTTACCGAAGCTGCCTCCTTCTCCGGGTAACGTTTCCTCTTCAAGTTCAGTTGGTAGCAGTGATTATACTGATGATGAATTGAATAAGATTGCAAAGAGTACCAAA…	MNGSDNFTSPSGPRSMTQPSFAFSSLPPLSPSPSLSRRNSLPLMNLSPSAPVESRESSIKVKKNLTLPPLGVKRRVAKDIAHLNRHYMSVSLDSCLHDLPKLPPSPGNVSSSSSVGSSDYTDDELNKIAKSTKLQEIASDPKKVRRILKNRESAACSKQRKLQYMIDLEQRINFL*
26	Arabidopsis thaliana	ATHA_26	AT2G13150.1	AtbZIP31	I	Chr2	5437056-5438459	ATGAATGGATCCGACAATAGCACTCCTTCCCGACCACGGTCGATAACTCAGCCTTCACTTGCCTTCTCTTCCTTGCCCCCATTGAGTCCTTCTCCGTCGTCATCCCGTCGCAATTCAATACCATTGATGAACCCGTCTGCTTCTGTGGAGAGTAGAGACTCTTCCATTAGGGTTAAGAAGAAATCTTTATTGCCTCCTTTGTGTGTGAAGAGAAGAGCACCCAAAGACGACATTGAACCTTTCAAGAGACACTACAGGAGTCTTTCAGTGGATAGTTGTTTGAGTGACTTACTAAAACTGCCTCCTTCTCCGAATAACGTTTCCTCTTCAAGATCGGTTGATGGAGAACAAAATGCTTCCGAGCTTGAGTTTGATACCAGTGTTTATACTGATGATGAA…	MNGSDNSTPSRPRSITQPSLAFSSLPPLSPSPSSSRRNSIPLMNPSASVESRDSSIRVKKKSLLPPLCVKRRAPKDDIEPFKRHYRSLSVDSCLSDLLKLPPSPNNVSSSRSVDGEQNASELEFDTSVYTDDELNKIAKSTKLKEVASDPKEVRRILKNQESAARSKQKKLQYMINLELKINFLENKNASIFEKIKLLENDKTMRMNEKKEIMIRIESLEQHAELRDALTEHLHVEIERLKAVLISNEKGNEKSPKSRDDNM*
27	Arabidopsis thaliana	ATHA_27	AT2G16770.1	AtbZIP23	F	Chr2	7279366-7281165	ATGGACGACGGTGAGCTTGAGTTTTCGAATTCAAACATGGGTGGTGAATTACCTAGCTGTTCGATGGATTCGTTCTTCGATGAGCTTTTGAGAGATTCTCATGCTTGTACTCATACTCACACTTGTAATCCTCCGGGACCAGAGAACACACATACTCACACATGTCTCCATGTGCACACCAAGATTCTTCCTGACAAAGTTTCTACTGATGATACATCGGAATCTTCAGGGAAGAAGAGACCTTTAGGGAATAGAGAAGCGGTTAGAAAGTATAGGGAGAAGAAGAAGGCTAAAGCGGCTTCGTTGGAGGATGAGGTTATGAGGCTTAAGGCGGTTAATAATCAGCTGTTGAAGAGGTTGCAAGGTCAAGCTGCATTGGAAGCTGAGGTTACTAGGCTC…	MDDGELEFSNSNMGGELPSCSMDSFFDELLRDSHACTHTHTCNPPGPENTHTHTCLHVHTKILPDKVSTDDTSESSGKKRPLGNREAVRKYREKKKAKAASLEDEVMRLKAVNNQLLKRLQGQAALEAEVTRLKCLLVDIRGRIDGEIGAFPYQKPAVTNVPYSYMMHPCNMQCDVDNLYCLQNGNNGEGASMNEQGLNGCEFDQLECLANQNLAGKEIPVCSNGIGTFTVNGSGVNKRKGEPRAAKAV*
28	Arabidopsis thaliana	ATHA_28	AT2G17770.1	AtbZIP27	A	Chr2	7723047-7724256	ATGGAAGAAGTATGGAAAGAAATCAACCTTGGTTCACTTCACTACCATCGGCAACTAAACATTGGTCATGAACCAATGTTAAAGAACCAAAACCCTAATAACTCCATCTTTCAAGATTTCCTCAACATGCCTCTGAATCAACCACCACCACCACCACCACCACCTTCCTCTTCCACCATTGTCACTGCTCTCTATGGCTCTCTGCCTCTTCCGCCTCCTGCCACTGTCCTCAGCTTAAACTCCGGTGTTGGATTCGAGTTTCTTGATACCACAGAAAATCTTCTTGCTTCTAACCCTCGCTCCTTTGAGGAATCTGCAAAGTTTGGTTGTCTTGGTAAGAAAAGAGGCCAAGATTCTGATGATACTAGAGGAGACAGAAGGTATAAGCGTATGATCAAG…	MEEVWKEINLGSLHYHRQLNIGHEPMLKNQNPNNSIFQDFLNMPLNQPPPPPPPPSSSTIVTALYGSLPLPPPATVLSLNSGVGFEFLDTTENLLASNPRSFEESAKFGCLGKKRGQDSDDTRGDRRYKRMIKNRESAARSRARKQECVSPHSSTF*
29	Arabidopsis thaliana	ATHA_29	AT2G18160.1	AtbZIP2	S	Chr2	7898012-7899242	ATGGCGTCATCTAGCAGCACATACCGGAGCTCAAGCTCTTCCGACGGTGGTAATAATAACCCGTCGGACTCCGTCGTCACCGTCGACGAACGAAAACGTAAAAGAATGTTATCGAACAGAGAATCTGCACGTAGGTCAAGGATGCGTAAACAGAAACACGTTGATGATCTAACGGCTCAGATCAATCAGCTATCAAACGACAACCGTCAGATCTTGAACAGCCTCACCGTAACATCTCAGCTTTACATGAAGATCCAAGCCGAGAACTCTGTTCTCACCGCTCAGATGGAGGAGCTTAGCACCAGACTCCAATCTCTCAACGAGATCGTTGATCTTGTTCAATCCAACGGTGCAGGATTTGGTGTTGACCAGATCGACGGCTGTGGTTTTGATGATCGT…	MASSSSTYRSSSSSDGGNNNPSDSVVTVDERKRKRMLSNRESARRSRMRKQKHVDDLTAQINQLSNDNRQILNSLTVTSQLYMKIQAENSVLTAQMEELSTRLQSLNEIVDLVQSNGAGFGVDQIDGCGFDDRTVGIDGYYDDMNMMSNVNHWGGSVYTNQPIMANDINMY*
30	Arabidopsis thaliana	ATHA_30	AT2G21230.4	AtbZIP30	I	Chr2	9093636-9096347	ATGGGTGGTGGTGGTGATACAACAGATACCAATATGATGCAGAGAGTTAATTCTTCTTCTGGTACATCGTCTTCTTCGATCCCTAAACACAATCTTCACTTGAATCCTGCTCTTATCCGCTCTCACCATCACTTCCGTCACCCTTTCACCGGAGCTCCTCCACCGCCGATTCCACCCATTTCTCCTTACTCTCAGATCCCGGCGACTTTACAACCTAGACATTCTCGCTCTATGTCGCAACCGTCTTCTTTCTTCTCCTTTGATTCATTGCCGCCGTTAAATCCTTCTGCTCCGTCGGTTTCGGTGTCGGTGGAGGAGAAAACCGGTGCCGGATTTAGTCCTTCGTTGCCTCCGTCACCGTTTACGATGTGTCATTCTTCTAGCTCTAGGAACGCCGGA…	MGGGGDTTDTNMMQRVNSSSGTSSSSIPKHNLHLNPALIRSHHHFRHPFTGAPPPPIPPISPYSQIPATLQPRHSRSMSQPSSFFSFDSLPPLNPSAPSVSVSVEEKTGAGFSPSLPPSPFTMCHSSSSRNAGDGENLPPRKSHRRSNSDVTFGFSSMMSQNQKSPPLSSLERSISGEDTSDWSNLVKKEPREGFYKGRKPEVEAAMDDVFTAYMNLDNIDVLNSFGGEDGKNGNENVEEMESSRGSGTKKTNGGSSSDSEGDSSASGNVKVALSSSSSGVKRRAGGDIAPTGRHYRSVSMDSCFMGKLNFGDESSLKLPPSSSAKVSPTNSGEGNSSAYSVEFGNSEFTAAEMKKIAADEKLAEIVMADPKRVKRILANRVSAARSKERKTRYMAELE…
31	Arabidopsis thaliana	ATHA_31	AT2G21235.1	AtbZIP74	X	Chr2	9096527-9098767	ATGAACGGTCGTGGAAATATGACTCAATACCAGCAGAATCCTTTCAGTACTGATGATGGTGGCCAGAGCACCGGCGTGTCACTCTCTTCCCGGACTTCTCTGTCACCACCACTGATCCGTTATCCAGCCGGGTCGCCGGACTTCAGCCCCGGACCACGGTGTACGACTCAACCGTCCCCTACCTTCTCCGACTTCACTCAAGCGAGTCCTTCACTGACGTCATTCAATAATCCGGCAAGCTTTACACCTTCGTTTAGCTTCTCCAACATTCACCAAATGATTCCTACGCCGTCGTCGTCCCATAACTCAAAGGCGTCGGTGAGCTCTGCTTCGTCGTCTAGCTTCTACTTTCCCCAGACGAGTCCTTCATCATGCTCTACTCCGTCGTCGTTCAGTCCA…	MNGRGNMTQYQQNPFSTDDGGQSTGVSLSSRTSLSPPLIRYPAGSPDFSPGPRCTTQPSPTFSDFTQASPSLTSFNNPASFTPSFSFSNIHQMIPTPSSSHNSKASVSSASSSSFYFPQTSPSSCSTPSSFSPDSFSHSNTGPWSIPQPSPVFSSIAPASSALSSFGPDSFSHSNTGTWSIPQPSPVFSSIAPASSAPPLFGRDSFPRSNRGKGSLIHRSPVLSVLPPAPVYSSNPMVRSSPPGHPSPSAHLEEMSNRPPLHPQPRVPVTRSNSAKVSGSRPRKYHKRTNSELSSMLVGDSSRGEEGGFGKLIYNEEAMKEFCSEYMIMPNQSAVNNSDQNRNADVLMITNTDSGGANDAKKYKRMLANRASAARSKENREKKIRDMELRVETLENTQA…
32	Arabidopsis thaliana	ATHA_32	AT2G22850.2	AtbZIP06	S	Chr2	9731279-9733545	ATGATGTCTACTGTACCGGCCTTTACCTTTACTGAACCGGGTTTGGTTAACCAATTATCGGATTTCCAGACCGGATTCACTCCTTGGGAATTGAACTGCTCCGATCTCTTCTCTACAATCCATCTCGAACCGGTCGTACCGAGTCCTTGTTCTGGTGAATCCGATGCCGGTTCTGTCAAAATTAACACCGATTTTAACGGTTTTGACGAATCGTGTATCGGTTCCATCAAAACTAACTCCGGTTCTGATGATTCCAACCTTTTCCACGGCGTACCGAGTCCTCAATCCGACGAATTGGACTCAAAAAACACGAAAATCCGAAGTAACGCCACGAATCATAACCGGAACAAATTGAACCGGTCGGTTTTGCAGGTGACTGACGACCGTAAACGCAAACGG…	MMSTVPAFTFTEPGLVNQLSDFQTGFTPWELNCSDLFSTIHLEPVVPSPCSGESDAGSVKINTDFNGFDESCIGSIKTNSGSDDSNLFHGVPSPQSDELDSKNTKIRSNATNHNRNKLNRSVLQVTDDRKRKRMESNRESAKRSRMRKQRHIDNLKDEANRLGLENRELANRLRIVLYNIALMCTDNNQLLSEQEILRRRFLEMRQILIFRQLQLNPSLIINHHHMI*
33	Arabidopsis thaliana	ATHA_33	AT2G31370.3	AtbZIP59	I	Chr2	13379037-13381485	ATGGATAAGGAGAAATCTCCAGCACCTCCTTGTGGAGGTCTTCCTCCTCCATCTCCATCAGGTCGATGCTCTGCATTCTCAGAAGCTGGTCCCATTGGTCATGGTTCAGATGCTAATCGAATGAGTCATGATATTAGCCGTATGCTTGATAACCCACCTAAGAAGATTGGACATCGGCGAGCTCATTCTGAAATACTTACTCTCCCTGATGATTTGAGCTTTGATAGTGATCTTGGTGTGGTTGGTAATGCTGCTGATGGAGCTTCTTTCTCTGATGAGACTGAAGAAGATTTGCTCTCTATGTATCTTGATATGGATAAGTTTAATTCTTCTGCTACATCTTCTGCCCAAGTTGGTGAGCCATCAGGAACTGCTTGGAAAAATGAGACAATGATGCAG…	MDKEKSPAPPCGGLPPPSPSGRCSAFSEAGPIGHGSDANRMSHDISRMLDNPPKKIGHRRAHSEILTLPDDLSFDSDLGVVGNAADGASFSDETEEDLLSMYLDMDKFNSSATSSAQVGEPSGTAWKNETMMQTGTGSTSNPQNTVNSLGERPRIRHQHSQSMDGSMNINEMLMSGNEDDSAIDAKKSMSATKLAELALIDPKRAKRIWANRQSAARSKERKTRYIFELERKVQTLQTEATTLSAQLTLLQRDTNGLTVENNELKLRLQTMEQQVHLQDELNEALKEEIQHLKVLTGQVAPSALNYGSFGSNQQQFYSNNQSMQTILAAKQFQQLQIHSQKQQQQQQQQQQQHQQQQQQQQQYQFQQQQMQQLMQQRLQQQEQQNGVRLKPSQAQKEN*
34	Arabidopsis thaliana	ATHA_34	ATHA_bZIP.Chr2.2	X	St	Chr2	14639548-14643993	ATGATGATGGTCCATTCGATGAGCAGAGATATGATGAACAGAGAGTCGCCGGATAAAGGGTTAGATTCCGGCAAGTATGTGAGGTACACGCCGGAGCAAGTGGAAGCTCTCGAGAGAGTTTACACTGAGTGTCCTAAGCCAAGTTCTCTAAGAAGACAACAACTCATACGTGAATGTCCGATTCTCTCTAACATCGAGCCTAAGCAGATCAAAGTTTGGTTTCAGAACCGCAGATGTCGTGAGAAGCAGAGGAAAGAAGCTGCTCGTCTTCAAACAGTGAACAGAAAACTCAATGCCATGAACAAACTCTTGATGGAAGAGAATGATCGTTTGCAGAAGCAAGTTTCTAACTTGGTCTATGAGAATGGCCACATGAAACATCAACTTCACACTGCTTCT…	MMMVHSMSRDMMNRESPDKGLDSGKYVRYTPEQVEALERVYTECPKPSSLRRQQLIRECPILSNIEPKQIKVWFQNRRCREKQRKEAARLQTVNRKLNAMNKLLMEENDRLQKQVSNLVYENGHMKHQLHTASGTTTDNSCESVVVSGQQHQQQNPNPQHQQRDANNPAGLLSIAEEALAEFLSKATGTAVDWVQMIGMKPGPDSIGIVAISRNCSGIAARACGLVSLEPMKVAEILKDRPSWLRDCRSVDTLSVIPAGNGGTIELIYTQMYAPTTLAAARDFWTLRYSTCLEDGSYVVCERSLTSATGGPTGPPSSNFVRAEMKPSGFLIRPCDGGGSILHIVDHVDLDAWSVPEVMRPLYESSKILAQKMTVAALRHVRQIAQETSGEVQYGGGRQP…
35	Arabidopsis thaliana	ATHA_35	AT2G35530.1	AtbZIP16	G	Chr2	14922836-14926609	ATGGCTAGCAATGAGATGGAAAAATCGAGTAAAGAGAAGGAACCTAAAACACCTCCTCCTTCTTCTACTGCCCCTCCCTCTTCACAGGAACCTTCATCGGCTGTGAGTGCTGGCATGGCTACTCCAGATTGGTCTGGTTTTCAGGCATATTCTCCTATGCCGCCGCCTCATGGTTATGTGGCATCTAGTCCCCAACCTCACCCTTATATGTGGGGAGTTCAGCATATGATGCCTCCTTATGGAACTCCGCCTCATCCTTATGTTGCAATGTATCCCCCAGGTGGCATGTACGCACATCCTTCAATGCCTCCGGGTTCTTATCCCTATAGCCCTTATGCTATGCCTTCTCCAAATGGAATGACTGAAGTTTCTGGCAATACTACAGGCGGCACTGATGGT…	MASNEMEKSSKEKEPKTPPPSSTAPPSSQEPSSAVSAGMATPDWSGFQAYSPMPPPHGYVASSPQPHPYMWGVQHMMPPYGTPPHPYVAMYPPGGMYAHPSMPPGSYPYSPYAMPSPNGMTEVSGNTTGGTDGDAKQSEVKEKLPIKRSRGSLGSLNMITGKNNEPGKNSGASANGAYSKSGESASDGSSEGSDGNSQNDSGSGLDGKDAEAASENGGSANGPQNGSAGTPILPVSQTVPIMPMTAAGVPGPPTNLNIGMDYWGAPTSAGIPGMHGKVSTPVPGVVAPGSRDGGHSQPWLQDDRELKRQRRKQSNRESARRSRLRKQAECDELAQRAEVLNEENTNLRAEINKLKSQCEELTTENTSLKDQLSLFPPLEGISMDNDHQEPDTNQTGAAE…
36	Arabidopsis thaliana	ATHA_36	AT2G36270.2	AtbZIP39	A	Chr2	15204659-15206660	ATGGTAACTAGAGAAACGAAGTTGACGTCAGAGCGAGAAGTAGAGTCGTCCATGGCGCAAGCGAGACATAATGGAGGAGGTGGTGGTGAGAATCATCCGTTTACTTCTTTGGGAAGACAATCCTCTATCTACTCATTGACCCTTGACGAGTTCCAACATGCTTTATGTGAGAACGGCAAGAACTTTGGGTCCATGAACATGGACGAGTTTCTTGTCTCTATTTGGAACGCAGAGGAGAATAATAACAATCAACAACAAGCAGCAGCAGCTGCAGGTTCACATTCTGTTCCGGCTAATCACAATGGTTTCAACAACAACAATAACAATGGAGGCGAGGGTGGTGTTGGTGTCTTTAGTGGTGGTTCTAGAGGCAACGAAGATGCTAACAATAAGAGAGGG…	MVTRETKLTSEREVESSMAQARHNGGGGGENHPFTSLGRQSSIYSLTLDEFQHALCENGKNFGSMNMDEFLVSIWNAEENNNNQQQAAAAAGSHSVPANHNGFNNNNNNGGEGGVGVFSGGSRGNEDANNKRGIANESSLPRQGSLTLPAPLCRKTVDEVWSEIHRGGGSGNGGDSNGRSSSSNGQNNAQNGGETAARQPTFGEMTLEDFLVKAGVVREHPTNPKPNPNPNQNQNPSSVIPAAAQQQLYGVFQGTGDPSFPGQAMGVGDPSGYAKRTGGGGYQQAPPVQAGVCYGGGVGFGAGGQQMGMVGPLSPVSSDGLGHGQVDNIGGQYGVDMGGLRGRKRVVDGPVEKVVERRQRRMIKNRESAARSRARKQAYTVELEAELNQLKEENAQLKH…
37	Arabidopsis thaliana	ATHA_37	AT2G40620.1	AtbZIP18	I	Chr2	16954418-16957183	ATGGAGGATCCTTCTAACCCACAACCAAACCAGAGCAATCTCTCGCAATGCCCGCCTTTAGCCACAGCTCCGACACCTGCGCCAGTTCGTGGTCCGTACCACCGGAGAGCACATTCGGAGGTCCAATTCCGTCTCCCTGAAGATCTGGATCTCTCTGAACCATTCGGAGGATTCGATGAGCTTGGATCCGAAGATGATCTCTTTTGCTCATACATGGACATTGAGAAACTTGGATCCGGATCCGGATCCGCATCCGATTCGGCTGGTCCTTCTGCTCCTAGGTCTGATAACCCGTTTTCCGCTGAGAATGGAGGTGCGGAGGCTGGGAATTCGAGACCTCGACACAGGCATAGCCTCTCCGTTGATGGCTCTTCGACTTTGGAGTCAATTGAGGCTAAG…	MEDPSNPQPNQSNLSQCPPLATAPTPAPVRGPYHRRAHSEVQFRLPEDLDLSEPFGGFDELGSEDDLFCSYMDIEKLGSGSGSASDSAGPSAPRSDNPFSAENGGAEAGNSRPRHRHSLSVDGSSTLESIEAKKAMAPDKLAELWVVDPKRAKRIIANRQSAARSKERKARYILELERKVQTLQTEATTLSAQLSLFQRDTTGLSSENTELKLRLQVMEQQAKLRDALNEQLKKEVERLKFATGEVSPADAYNLGMAHMQYQQQPQQSFFQHHHQQQTDAQNLQQMTHQFHLFQPNNNQNQSSRTNPPTAHQLMHHATSNAPAQSHSYSEAMHEDHLGRLQGLDISSCGRGSNFGRSDTVSESSSTM*
38	Arabidopsis thaliana	ATHA_38	AT2G40950.1	AtbZIP17	B	Chr2	17087565-17090556	ATGGCTGAACCAATCACCAAGGAGCAGCCTCCTCCACCTGCTCCGGACCCTAATTCCACCTACCCTCCTCCGTCCGATTTTGATTCCATCTCGATCCCTCCGTTAGATGATCATTTCTCCGATCAGACTCCGATTGGTGAACTAATGTCCGATCTGGGGTTTCCCGATGGTGAATTCGAGCTCACTTTCGACGGTATGGACGATCTTTACTTCCCTGCTGAGAATGAGTCGTTTCTCATCCCTATCAATACGTCCAATCAAGAACAGTTTGGTGATTTCACTCCGGAGTCTGAAAGTTCTGGAATTTCCGGTGATTGTATTGTTCCCAAAGATGCAGATAAGACTATTACAACTTCCGGTTGCATTAACCGGGAATCTCCTAGAGATTCCGATGATCGT…	MAEPITKEQPPPPAPDPNSTYPPPSDFDSISIPPLDDHFSDQTPIGELMSDLGFPDGEFELTFDGMDDLYFPAENESFLIPINTSNQEQFGDFTPESESSGISGDCIVPKDADKTITTSGCINRESPRDSDDRCSGADHNLDLPTPLSSQGSGNCGSDVSEATNESSPKSRNVAVDQKVKVEEAATTTTSITKRKKEIDEDLTDESRNSKYRRSGEDADASAVTGEEDEKKRARLMRNRESAQLSRQRKKHYVEELEEKVRNMHSTITDLNGKISYFMAENATLRQQLGGNGMCPPHLPPPPMGMYPPMAPMPYPWMPCPPYMVKQQGSQVPLIPIPRLKPQNTLGTSKAKKSESKKSEAKTKKVASISFLGLLFCLFLFGALAPIVNVNYGGISGAFY…
39	Arabidopsis thaliana	ATHA_39	AT2G41070.5	AtbZIP12	A	Chr2	17130774-17132090	ATGGGTTCTATTAGAGGAAACATTGAAGAGCCTATATCTCAGTCATTAACGAGGCAGAACTCTCTCTATAGCTTAAAGCTCCATGAGGTTCAAACCCACTTAGGAAGTTCTGGAAAACCACTAGGAAGCATGAACCTTGATGAGCTTCTCAAGACTGTCTTGCCACCAGCTGAGGAAGGGCTTGTTCGTCAGGGAAGCTTGACGTTACCTCGAGATCTCAGTAAAAAGACAGTTGATGAGGTCTGGAGAGATATCCAACAGGACAAGAATGGAAACGGTACTAGTACTACTACTACTCATAAGCAGCCTACACTCGGTGAAATAACACTTGAGGATTTGTTGTTGAGAGCTGGTGTAGTGACTGAGACAGTAGTCCCTCAAGAAAATGTTGTTAACATA…	MGSIRGNIEEPISQSLTRQNSLYSLKLHEVQTHLGSSGKPLGSMNLDELLKTVLPPAEEGLVRQGSLTLPRDLSKKTVDEVWRDIQQDKNGNGTSTTTTHKQPTLGEITLEDLLLRAGVVTETVVPQENVVNIASNGQWVEYHHQPQQQQGFMTYPVCEMQDMVMMGGLSDTPQAPGRKRVAGEIVEKTVERRQKRMIKNRESAARSRARKQAYTHELEIKVSRLEEENEKLRRLKVKIPSLQLAS*
40	Arabidopsis thaliana	ATHA_40	AT2G42380.1	AtbZIP34	E	Chr2	17646900-17648945	ATGGCACAACTCCCTCCTAAAATCCCCAACATGACACAACATTGGCCTGATTTCTCTTCCCAAAAGCTCTCTCCTTTCTCTACCCCAACCGCAACCGCTGTCGCCACCGCTACAACCACCGTACAAAACCCCTCATGGGTCGACGAATTCCTCGACTTCTCAGCGTCTCGCCGTGGCAACCACCGTCGTTCCATCAGCGACTCTATCGCATTCCTCGAAGCTCCAACAGTCAGCATCGAAGACCACCAATTCGACAGGTTCGATGACGAACAGTTCATGTCGATGTTCACCGACGACGACAACCTTCATAGCAATCCTTCCCATATCAACAACAAAAATAACAATGTGGGGCCCACGGGATCTTCCTCGAACACATCCACGCCGTCCAATAGCTTCAAC…	MAQLPPKIPNMTQHWPDFSSQKLSPFSTPTATAVATATTTVQNPSWVDEFLDFSASRRGNHRRSISDSIAFLEAPTVSIEDHQFDRFDDEQFMSMFTDDDNLHSNPSHINNKNNNVGPTGSSSNTSTPSNSFNDDNKELPPSDHNMNNNINNNYNDEVQSQCKMEPEDGTASNNNSGDSSGNRILDPKRVKRILANRQSAQRSRVRKLQYISELELLSPRVAFLDHQRLLLNVDNSALKQRIAALSQDKLFKDAHQEALKREIERLRQVYNQQSLTNVENANHLSATGAGATPAVDIKSSVETEQLLNVS*
41	Arabidopsis thaliana	ATHA_41	AT2G46270.4	AtbZIP55	G	Chr2	19000191-19003403	ATGGGAAATAGCAGCGAGGAACCAAAGCCTCCTACCAAATCAGATAAACCATCTTCACCCCCGGTGGATCAAACAAATGTTCATGTCTACCCTGATTGGGCAGCTATGCAGGCATATTATGGTCCAAGAGTAGCAATGCCTCCTTATTACAATTCAGCTATGGCTGCATCTGGTCATCCTCCTCCTCCTTACATGTGGAATCCTCAGCATATGATGTCACCATATGGAGCACCCTATGCTGCTGTTTATCCTCATGGAGGAGGAGTTTACGCTCATCCCGGTATTCCCATGGGATCACTGCCTCAAGGTCAAAAGGATCCACCTTTAACAACTCCGGGGACGCTTTTGAGCATCGACACTCCTACTAAATCTACAGGGAACACAGACAATGGATTGATG…	MGNSSEEPKPPTKSDKPSSPPVDQTNVHVYPDWAAMQAYYGPRVAMPPYYNSAMAASGHPPPPYMWNPQHMMSPYGAPYAAVYPHGGGVYAHPGIPMGSLPQGQKDPPLTTPGTLLSIDTPTKSTGNTDNGLMKKLKEFDGLAMSLGNGNPENGADEHKRSRNSSETDGSTDGSDGNTTGADEPKLKRSREGTPTKDGKQLVQASSFHSVSPSSGDTGVKLIQGSGAILSPGNERELKRERRKQSNRESARRSRLRKQAETEELARKVEALTAENMALRSELNQLNEKSDKLRGANATLLDKLKCSEPEKRVPANMLSRVKNSGAGDKNKNQGDNDSNSTSKLHQLLDTKPRAKAVAAG*
42	Arabidopsis thaliana	ATHA_42	AT3G10800.1	AtbZIP28	B	Chr3	3379168-3381621	ATGACGGAATCAACATCCGTGGTTGCTCCTCCGCCGGAGATACCTAATCTGAACCCTAGCATGTTTTCTGAGTCCGATTTGTTTTCTATTCCGCCGCTAGATCCTCTTTTCCTATCTGATTCTGATCCGATTTCAATGGATGCGCCAATCTCCGATCTCGACTTCTTACTCGACGATGAGAACGGAGATTTCGCTGATTTTGATTTCTCGTTTGATAATTCTGATGATTTCTTCGATTTCGATTTATCGGAGCCCGCGGTGGTGATCCCTGAGGAGATCGGTAACAATCGTTCGAATTTGGACTCATCGGAAAACAGAAGCGGCGATGGAGGTTTAGAAGGAAGATCTGAGTCTGTTCATTCACAGGTTTCATCTCAAGGCTCCAAGACTTTTGTGTCC…	MTESTSVVAPPPEIPNLNPSMFSESDLFSIPPLDPLFLSDSDPISMDAPISDLDFLLDDENGDFADFDFSFDNSDDFFDFDLSEPAVVIPEEIGNNRSNLDSSENRSGDGGLEGRSESVHSQVSSQGSKTFVSDTVDASSSPESSNHQKSSVSKRKKENGDSSGELRSCKYQKSDDKSVATNNEGDDDDDKRKLIRQIRNRESAQLSRLRKKQQTEELERKVKSMNATIAELNGKIAYVMAENVALRQQMAVASGAPPMNPYMAAPPLPYQWMPYPPYPVRGYGSQTPLVPIPKLNPKPVSSCRPKKAESKKNEGKSKLKKVASISFIGILFFVFLFGTLVPFMNVNFGGERGSFGGLSKYDGHRYYDEHKGRVLMVGDGSDVRRNSGISEGNIHSSRI…
43	Arabidopsis thaliana	ATHA_43	AT3G12250.7	AtbZIP45	D	Chr3	3905686-3908583	ATGGCTGATACCAGTTCAAGGACTGATGTCTCAACTGATGGTGACACAGATCATAGAGATCTGGGGTCTGATAGAGGGCATATGCATGCTGCTGCCTCTGATTCCAGTGATCGATCAAAGGATAAGTTGGATCAAAAGACCCTTCGTAGGCTTGCTCAAAATCGTGAGGCAGCAAGAAAAAGCAGATTGAGGAAGAAGGCGTATGTTCAGCAGCTGGAGAATAGTCGATTAAAGCTGACTCAACTTGAGCAGGAGCTGCAAAGAGCAAGACAGCAGGGAGTTTTCATCTCAAGTTCAGGAGACCAAGCTCATTCTACTGGTGGCAATGGGGCTTTGGCATTTGATGCAGAACACTCACGATGGCTTGAAGAAAAGAACAGGCAAATGAACGAGCTGAGA…	MADTSSRTDVSTDGDTDHRDLGSDRGHMHAAASDSSDRSKDKLDQKTLRRLAQNREAARKSRLRKKAYVQQLENSRLKLTQLEQELQRARQQGVFISSSGDQAHSTGGNGALAFDAEHSRWLEEKNRQMNELRSALNAHAGDTELRIIVDGVMAHYEELFRIKSNAAKNDVFHLLSGMWKTPAERCFLWLGGFRSSELLKLLANQLEPMTERQVMGINSLQQTSQQAEDALSQGMESLQQSLADTLSSGTLGSSSSDNVASYMGQMAMAMGQLGTLEGFIRQADNLRLQTLQQMLRVLTTRQSARALLAIHDYSSRLRALSSLWLARPRE*
44	Arabidopsis thaliana	ATHA_44	AT3G17609.1	AtbZIP64	H	Chr3	6023929-6024693	ATGTCTCTCCAACGACCCAATGGGAACTCGAGTTCGTCTTCTTCCCACAAGAAGCACAAAACTGCAGCTGGATCAACATGTGTTCTAAGCAGCAGCGCCGACGATGGAGTCAACAATCCGGAGCTTGACCAGACTCAAAATGGAGTCTCTACAGCTAAACGCCGCCGTGGAAGAAACCCTGTTGATAAAGAATATAGAAGCCTCAAGAGATTATTGAGGAACAGAGTATCAGCGCAACAAGCAAGAGAGAGGAAGAAAGTGTATGTGAGTGATTTGGAATCAAGAGCTAATGAGTTACAGAACAACAATGACCAGCTCGAAGAGAAGATTTCTACTTTGACGAACGAGAACACAATGCTTCGTAAAATGCTTATTAACACAAGGCCTAAAACTGATGAC…	MSLQRPNGNSSSSSSHKKHKTAAGSTCVLSSSADDGVNNPELDQTQNGVSTAKRRRGRNPVDKEYRSLKRLLRNRVSAQQARERKKVYVSDLESRANELQNNNDQLEEKISTLTNENTMLRKMLINTRPKTDDNH*
45	Arabidopsis thaliana	ATHA_45	AT3G19290.4	AtbZIP38	A	Chr3	6687111-6689470	ATGGGAACTCACATCAATTTCAACAACTTAGGAGGTGGTGGTCATCCTGGAGGGGAAGGGAGTAGTAACCAGATGAAGCCAACGGGTAGTGTCATGCCCTTGGCTAGGCAGTCCTCGGTCTACTCCCTTACCTTTGATGAGTTACAGAACACACTAGGTGGACCGGGAAAAGATTTCGGGTCGATGAACATGGATGAACTCCTGAAGAGCATATGGACTGCTGAGGAAGCTCAGGCCATGGCCATGACTTCTGCGCCAGCTGCTACAGCGGTAGCGCAACCTGGTGCTGGTATCCCACCCCCAGGTGGGAATCTCCAGAGGCAAGGTTCGTTGACGTTGCCTAGAACAATTAGTCAGAAGACTGTTGATGAGGTGTGGAAATGTTTGATCACCAAGGAT…	MGTHINFNNLGGGGHPGGEGSSNQMKPTGSVMPLARQSSVYSLTFDELQNTLGGPGKDFGSMNMDELLKSIWTAEEAQAMAMTSAPAATAVAQPGAGIPPPGGNLQRQGSLTLPRTISQKTVDEVWKCLITKDGNMEGSSGGGGESNVPPGRQQTLGEMTLEEFLFRAGVVREDNCVQQMGQVNGNNNNGFYGNSTAAGGLGFGFGQPNQNSITFNGTNDSMILNQPPGLGLKMGGTMQQQQQQQQLLQQQQQQMQQLNQPHPQQRLPQTIFPKQANVAFSAPVNITNKGFAGAANNSINNNNGLASYGGTGVTVAATSPGTSSAENNSLSPVPYVLNRGRRSNTGLEKVIERRQRRMIKNRESAARSRARKQAYTLELEAEIEKLKKTNQELQKKQAE…
46	Arabidopsis thaliana	ATHA_46	AT3G30530.1	AtbZIP42	S	Chr3	12139438-12140293	ATGCAGCCGCAAACAGACGTTTTCAGCCTCCATAACTACCTAAACTCATCGATACTGCAGTCTCCGTATCCTTCTAATTTCCCGATATCTACGCCATTTCCAACCAACGGTCAAAACCCGTACCTCCTCTACGGATTCCAAAGCCCTACAAACAATCCACAATCCATGAGCCTAAGCAGCAACAACTCAACATCAGATGAAGCAGAAGAGCAGCAGACGAACAACAATATAATCAACGAGCGGAAGCAGAGAAGGATGATTTCAAACCGAGAATCCGCAAGGAGATCGCGTATGAGGAAGCAAAGACACCTTGACGAGCTTTGGTCACAAGTGATGTGGTTAAGGATCGAGAATCATCAGTTGCTTGATAAGCTTAACAATCTCTCTGAGTCTCACGAC…	MQPQTDVFSLHNYLNSSILQSPYPSNFPISTPFPTNGQNPYLLYGFQSPTNNPQSMSLSSNNSTSDEAEEQQTNNNIINERKQRRMISNRESARRSRMRKQRHLDELWSQVMWLRIENHQLLDKLNNLSESHDKVLQENAQLKEETFELKQVISDMQIQSPFSCFRDDIIPIE*
47	Arabidopsis thaliana	ATHA_47	AT3G44460.1	AtbZIP67	A	Chr3	16079432-16081906	ATGTCGGTTTTCGAATCGGAGACTTCGAACTTCCACGTCTACAACAACCACGAAATCCAAACGCAACCGCAAATGCAAACGTTTCTGTCGGAGGAGGAACCGGTAGGGAGACAGAACTCGATTTTGTCACTAACTCTTGACGAAATTCAGATGAAAAGCGGTAAGAGCTTTGGAGCGATGAACATGGACGAGTTCCTAGCGAACTTGTGGACAACCGTTGAAGAAAACGACAACGAAGGAGGTGGGGCTCACAACGACGGAGAGAAGCCGGCGGTGCTGCCACGTCAAGGGTCGTTGTCCCTCCCTGTGCCTTTATGCAAGAAAACGGTCGACGAGGTTTGGCTCGAGATACAAAACGGTGTACAACAACATCCACCGTCGTCGAATTCCGGTCAAAAC…	MSVFESETSNFHVYNNHEIQTQPQMQTFLSEEEPVGRQNSILSLTLDEIQMKSGKSFGAMNMDEFLANLWTTVEENDNEGGGAHNDGEKPAVLPRQGSLSLPVPLCKKTVDEVWLEIQNGVQQHPPSSNSGQNSAENIRRQQTLGEITLEDFLVKAGVVQEPLKTTMRMSSSDFGYNPEFGVGLHCQNQNNYGDNRSVYSENRPFYSVLGESSSCMTGNGRSNQYLTGLDAFRIKKRIIDGPPEILMERRQRRMIKNRESAARSRARRQAYTVELELELNNLTEENTKLKEIVEENEKKRRQEIISRSKQVTKEKSGDKLRKIRRMASAGW*
48	Arabidopsis thaliana	ATHA_48	AT3G49760.1	AtbZIP05	S	Chr3	18455231-18456125	ATGATGTCTACTATTTCCCCGGTTTTCTCAACCGAACCGGGTCTATTAACCTCTGTCCTCCCAGCTTTTGAAACCAGTTTCACTCCATGGGACATTTCACACCTCTTCTCGGTCTTCGATTCATTAATCGATCCAAAACCGGTTTCGACCCATGACTATGGTTCAGTAAACCAGATCGGTTCAGACATGTCTCCGACCGACAATACCGACGAGCGGAAAAAGAAACGGAAATTATCGAACCGGGAATCGGCTAAGCGGTCAAGAGAGAAGAAACAAAAGCACTTGGAGGAGATGAGTATCCAGCTAAACCAACTCAAAATTCAGAACCAAGAATTGAAGAACCAGCTTCGGTACGTTTTATACCATTGTCAACGAACGAAGATGGAAAATGATCGTCTA…	MMSTISPVFSTEPGLLTSVLPAFETSFTPWDISHLFSVFDSLIDPKPVSTHDYGSVNQIGSDMSPTDNTDERKKKRKLSNRESAKRSREKKQKHLEEMSIQLNQLKIQNQELKNQLRYVLYHCQRTKMENDRLLMEHRILHDKLLNIRQVLMFRQT*
49	Arabidopsis thaliana	ATHA_49	AT3G51960.1	AtbZIP24	F	Chr3	19282601-19284146	ATGTTTTGTTGTTGCAAGGATTGCAGAGGAAACCAACGAGTTTCTAACTTTGATTCTCTAACAGGTGTTTTCTTTGGAGATCTTGAGTTTGGACCTCAGAATCAAAGATATATAAAGATGAATGAGGAAGAAGATAAAGATCAAGATCGAGTAACGAGAGGATGTAGTCACACTCATAGCTGTAACCCTCCAGGCCCAGAGGATGCTTCTCACTCCCACACATGCTTCCACGCTCACACTCATCTCATCATCTCTGATCAGCAAGAGAATGATCATTCTGACAGTAGCAACAAGAAACGGTTATGTGGTAATAGAGAGGCAGTGAGGAAGTACAGGGAGAAGAAGAAGGCTCGCACTGCATACCTTGAAGATGAAGTGATGAGATTGCAATCTCTGAAT…	MFCCCKDCRGNQRVSNFDSLTGVFFGDLEFGPQNQRYIKMNEEEDKDQDRVTRGCSHTHSCNPPGPEDASHSHTCFHAHTHLIISDQQENDHSDSSNKKRLCGNREAVRKYREKKKARTAYLEDEVMRLQSLNEQFLRKLQSQEMVETELIRLRALLVEMQGKIEVELCSFSFQKQCNGSGFVFKEDGCNLATSNMMCEAARVECEEGQTLHDPIQSFVPQPPPFSR*
50	Arabidopsis thaliana	ATHA_50	AT3G54620.2	AtbZIP25	C	Chr3	20217897-20220410	ATGCACATCGTCTTCTCTGTCGATGATTTGACCGAATCCTTCTGGCCTGTTCCCGCTCCGGCGCCGTCGCCGGGATCGTCATCGACTCCGTCACCGACGCAGAACGTGGCGGATGGGATGACTCGAAGTCAATCGGAGTGGGCGTTCCACAGGCTTATCAATGAGTTGTCTGGTTCCGATTCGAGCCCTACGACTAACACAATCGAGAGATCACCTCCACCGGTTCAGTCTCTTTCGAGATTAGAAGAAACCGTTGACGAAACCGAAGATGTTGTTGAGATTCAGAAACCGCAGAATCATCGACGGCTCCCTGTTGATGATCAAGGGAAGAATCGGAATCGTGCTCCGTCGTCTGATCCGGTTGATTCTTCAGCTCCTGTTGTTGTTGATCCTAATCAG…	MHIVFSVDDLTESFWPVPAPAPSPGSSSTPSPTQNVADGMTRSQSEWAFHRLINELSGSDSSPTTNTIERSPPPVQSLSRLEETVDETEDVVEIQKPQNHRRLPVDDQGKNRNRAPSSDPVDSSAPVVVDPNQYHAILKSKLELACAAVARRVGTVKPEDSSASASNQKQAQGSIVAQTSPGASSVRFSPTTSTQKKPDVPARQTSISSRDDSDDDDLDGDADNGDPTDVKRARRMLSNRESARRSRRRKQEQMNEFDTQVRSFISCSYIYTFLESFLLFNSLQGFIGKVFTNCR*
51	Arabidopsis thaliana	ATHA_51	AT3G56660.1	AtbZIP49	B	Chr3	20986109-20988320	ATGGCGGAACCAGTTTTGGAGGACACTTATCTTACTTTCTCTTCCGATTTCGATTACATCGCGATCGCTCCTTCTCCCTTTGATAATTTCTGCAATTCTAACTCTGATCAAGTTCGGAACTCGATCTCTGATCTGAGGTTTTTGATTGACGACGACGACAGTTTCGACGATCTCTACTTCCCTTCTGAGAACGAATCGTTCTGCATTCCTCCTGACGCTACGAAACGAGAAATGTCTGGTGACTTTACGCCGGCGTCGGGAATTTCAGGCGATTGTGTTAACGAAGACACGGAGAAGAATACGAATGGCGTGTTAATATCTACTTCAAGCTGCTACAATAGAGAATCACCTACGGATTCTGATTTCTCCGGTACTAGTCAGAGCTTGAGTTTTTCGGGG…	MAEPVLEDTYLTFSSDFDYIAIAPSPFDNFCNSNSDQVRNSISDLRFLIDDDDSFDDLYFPSENESFCIPPDATKREMSGDFTPASGISGDCVNEDTEKNTNGVLISTSSCYNRESPTDSDFSGTSQSLSFSGQDSAKRKTEIEEDSSDESRRLGKDGFASVIKVGGEEDDEKKKNVRLVRNRESAHLSRQRKKHYVEELEDKVKNMHSTISELSSKMSYFVAENVTLRQQMGTRFSSGPPMVPIVYPWMQYPAYMVKPQGSQVALLPIPRLKPKHSVAKVKKFKKVASFSVFGFLFCMFLFGALVNISYGEYKSNYVTDGVYDQSRGRVLVVDSSRVHCGGDSDQGVGRNVSETENLGPPRNSSEPLVASLFVPRNEKLVKIDGNLIIHSVLASEKAR…
52	Arabidopsis thaliana	ATHA_52	AT3G56850.1	AtbZIP66	A	Chr3	21046234-21048614	ATGGATTCTCAGAGGGGTATTGTTGAACAAGCTAAATCTCAGTCCTTGAATAGGCAAAGCTCTCTTTACAGCTTAACACTTGATGAGGTTCAAAATCACTTGGGGAGTTCTGGTAAAGCTCTGGGAAGCATGAACCTTGATGAGCTTTTGAAGAGTGTCTGTTCTGTTGAAGCTAATCAGCCATCGTCTATGGCTGTCAATGGTGGAGCAGCTGCTCAGGAGGGTCTTTCTCGCCAGGGGAGTTTGACTTTGCCTCGGGATCTCAGCAAAAAGACTGTTGATGAGGTTTGGAAAGACATTCAGCAGAATAAGAATGGAGGTAGTGCTCATGAGAGGAGGGATAAGCAGCCTACACTTGGGGAAATGACGCTTGAAGACCTGTTGTTGAAAGCAGGAGTG…	MDSQRGIVEQAKSQSLNRQSSLYSLTLDEVQNHLGSSGKALGSMNLDELLKSVCSVEANQPSSMAVNGGAAAQEGLSRQGSLTLPRDLSKKTVDEVWKDIQQNKNGGSAHERRDKQPTLGEMTLEDLLLKAGVVTETIPGSNHDGPVGGGSAGSGAGLGQNITQVGPWIQYHQLPSMPQPQAFMPYPVSDMQAMVSQSSLMGGLSDTQTPGRKRVASGEVVEKTVERRQKRMIKNRESAARSRARKQAYTHELEIKVSRLEEENERLRKQKEVEKILPSVPPPDPKRQLRRTSSAPF*
53	Arabidopsis thaliana	ATHA_53	AT3G58120.2	AtbZIP61	E	Chr3	21520974-21523375	ATGGCACAACTTCCTCCGAAAATCCCAACCATGACGACGCCAAATTGGCCTGACTTCTCCTCCCAGAAACTCCCTTCCATAGCCGCAACGGCGGCAGCCGCAGCAACCGCTGGACCTCAACAACAAAACCCTTCATGGATGGATGAGTTTCTCGACTTCTCAGCGACTCGCCGTGGGACTCACCGTCGTTCTATAAGCGACTCCATTGCTTTCCTTGAACCACCTTCCTCCGGCGTCGGAAACCACCACTTCGATAGGTTTGACGACGAGCAATTCATGTCCATGTTCAACGACGACGTACACAACAATAACCACAATCATCATCATCATCACAGCATCAACGGCAATGTGGGTCCCACGCGTTCATCCTCCAACACCTCCACGCCGTCCGATCATAAT…	MAQLPPKIPTMTTPNWPDFSSQKLPSIAATAAAAATAGPQQQNPSWMDEFLDFSATRRGTHRRSISDSIAFLEPPSSGVGNHHFDRFDDEQFMSMFNDDVHNNNHNHHHHHSINGNVGPTRSSSNTSTPSDHNSLSDDDNNKEAPPSDHDHHMDNNVANQNNAAGNNYNESDEVQSQCKTEPQDGPSANQNSGGSSGNRIHDPKRVKRILANRQSAQRSRVRKLQYISELERSVTSLQTEVSVLSPRVAFLDHQRLLLNVDNSAIKQRIAALAQDKIFKDGNFLF*
54	Arabidopsis thaliana	ATHA_54	AT3G62420.1	AtbZIP53	S	Chr3	23091586-23092850	ATGGGGTCGTTGCAAATGCAAACAAGTCCTGAATCCGATAATGATCCGAGGTACGCCACGGTGACGGATGAGAGGAAGAGGAAGAGAATGATCTCTAACAGAGAATCTGCTCGGAGGTCAAGGATGAGGAAACAGAAGCAACTTGGTGATTTGATCAACGAAGTCACTCTTCTCAAGAATGATAACGCTAAAATCACTGAGCAGGTTGATGAAGCTTCAAAGAAATACATTGAAATGGAGTCTAAGAACAATGTCTTGAGGGCACAGGCTTCGGAGTTGACGGATAGGTTGAGATCATTGAACTCTGTGCTTGAGATGGTTGAAGAAATTAGTGGTCAGGCTTTGGATATTCCTGAGATTCCTGAATCTATGCAGAACCCTTGGCAGATGCCTTGTCCA…	MGSLQMQTSPESDNDPRYATVTDERKRKRMISNRESARRSRMRKQKQLGDLINEVTLLKNDNAKITEQVDEASKKYIEMESKNNVLRAQASELTDRLRSLNSVLEMVEEISGQALDIPEIPESMQNPWQMPCPMQPIRASADMFDC*
55	Arabidopsis thaliana	ATHA_55	AT4G01120.1	AtbZIP54	G	Chr4	481569-484524	ATGGGTAGCAACGAAGAAGGAAACCCCACTAACAACTCTGATAAGCCATCGCAAGCTGCTGCTCCTGAGCAGAGTAATGTTCATGTGTATCATCATGACTGGGCTGCTATGCAGGCATATTATGGGCCTAGAGTTGGTATACCTCAATATTACAACTCAAATTTGGCGCCTGGTCATGCTCCACCGCCTTATATGTGGGCGTCTCCATCGCCAATGATGGCTCCTTATGGAGCACCATATCCACCATTTTGCCCTCCTGGTGGAGTTTATGCTCATCCTGGTGTTCAAATGGGCTCACAACCACAAGGTCCTGTTTCTCAATCAGCATCTGGAGTTACAACCCCTTTGACCATTGATGCACCAGCTAATTCAGCTGGAAACTCAGATCATGGGTTCATG…	MGSNEEGNPTNNSDKPSQAAAPEQSNVHVYHHDWAAMQAYYGPRVGIPQYYNSNLAPGHAPPPYMWASPSPMMAPYGAPYPPFCPPGGVYAHPGVQMGSQPQGPVSQSASGVTTPLTIDAPANSAGNSDHGFMKKLKEFDGLAMSISNNKVGSAEHSSSEHRSSQSSENDGSSNGSDGNTTGGEQSRRKRRQQRSPSTGERPSSQNSLPLRGENEKPDVTMGTPVMPTAMSFQNSAGMNGVPQPWNEKEVKREKRKQSNRESARRSRLRKQAETEQLSVKVDALVAENMSLRSKLGQLNNESEKLRLENEAILDQLKAQATGKTENLISRVDKNNSVSGSKTVQHQLLNASPITDPVAAS*
56	Arabidopsis thaliana	ATHA_56	AT4G02640.1	AtbZIP10	C	Chr4	1153945-1156350	ATGAACAGTATCTTCTCCATTGACGATTTCTCCGATCCTTTCTGGGAAACTCCTCCGATTCCTCTCAATCCCGACTCTTCTAAGCCTGTTACGGCGGATGAAGTTAGCCAGAGTCAACCGGAATGGACTTTCGAGATGTTTCTCGAAGAGATTTCTTCGTCGGCGGTGAGCTCTGAGCCACTTGGTAACAACAACAACGCGATCGTCGGTGTTTCTTCGGCGCAATCTCTTCCTTCTGTTTCCGGACAGAATGATTTCGAGGATGATAGTCGATTTCGTGATCGCGATTCGGGAAATTTGGATTGTGCTGCTCCCATGACGACGAAGACGGTGATTGTTGATTCCGATGATTATCGTCGTGTTCTTAAGAACAAGCTTGAGACTGAGTGCGCTACTGTT…	MNSIFSIDDFSDPFWETPPIPLNPDSSKPVTADEVSQSQPEWTFEMFLEEISSSAVSSEPLGNNNNAIVGVSSAQSLPSVSGQNDFEDDSRFRDRDSGNLDCAAPMTTKTVIVDSDDYRRVLKNKLETECATVVSLRVGSVKPEDSTSSPETQLQPVQSSPLTQGELGVTSSLPAEVKKTGVSMKQVTSGSSREYSDDEDLDEENETTGSLKPEDVKKSRRMLSNRESARRSRRRKQEQTSDLETQVNDLKGEHSSLLKQLSNMNHKYDEAAVGNRILKADIETLRAKVKMAEETVKRVTGMNPMLLGRSSGHNNNNRMPITGNNRMDSSSIIPAYQPHSNLNHMSNQNIGIPTILPPRLGNNFAAPPSQTSSPLQRIRNGQNHHVTPSANPYGWNTEP…
57	Arabidopsis thaliana	ATHA_57	AT4G34000.3	AtbZIP37	A	Chr4	16295431-16298243	ATGGGGTCTAGATTAAACTTCAAGAGCTTTGTTGATGGTGTGAGTGAGCAGCAGCCAACGGTGGGGACTAGTCTTCCATTGACTAGGCAGAACTCTGTGTTCTCGTTAACCTTTGATGAGTTTCAGAACTCATGGGGTGGTGGAATTGGGAAAGATTTTGGGTCTATGAACATGGATGAGCTCTTGAAGAACATTTGGACTGCAGAGGAAAGTCATTCAATGATGGGAAACAATACCAGTTACACCAACATCAGCAATGGTAATAGTGGAAACACTGTTATTAACGGCGGTGGTAACAACATTGGTGGGTTAGCTGTTGGTGTGGGAGGAGAAAGTGGTGGTTTTTTCACTGGTGGGAGTTTGCAGAGACAAGGTTCACTTACCTTGCCTCGGACGATT…	MGSRLNFKSFVDGVSEQQPTVGTSLPLTRQNSVFSLTFDEFQNSWGGGIGKDFGSMNMDELLKNIWTAEESHSMMGNNTSYTNISNGNSGNTVINGGGNNIGGLAVGVGGESGGFFTGGSLQRQGSLTLPRTISQKRVDDVWKELMKEDDIGNGVVNGGTSGIPQRQQTLGEMTLEEFLVRAGVVREEPQPVESVTNFNGGFYGFGSNGGLGTASNGFVANQPQDLSGNGVAVRQDLLTAQTQPLQMQQPQMVQQPQMVQQPQQLIQTQERPFPKQTTIAFSNTVDVVNRSQPATQCQEVKPSILGIHNHPMNNNLLQAVDFKTGVTVAAVSPGSQMSPDLTPKSALDASLSPVPYMFGRVRKTGAVLEKVIERRQKRMIKNRESAARSRARKQAYTME…
58	Arabidopsis thaliana	ATHA_58	AT4G34590.1	AtbZIP11	S	Chr4	16521861-16523230	ATGGAATCGTCGTCGTCGGGAACAACTTCGTCGACGATTCAAACGTCGTCAGGATCGGAGGAGAGTCTCATGGAGCAGAGGAAACGTAAACGGATGCTCTCAAACCGTGAATCTGCAAGGAGATCAAGAATGAAGAAACAAAAGCTCCTAGACGATCTAACGGCTCAGGTTAATCATCTGAAAAAAGAGAACACGGAGATCGTGACAAGTGTCAGCATCACAACGCAACACTACCTAACCGTTGAAGCAGAGAACTCTGTTCTCAGAGCTCAGCTTGATGAACTTAACCACAGGCTCCAATCTCTCAACGACATCATCGAGTTCCTCGACAGTAGCAACAACAACAACAACAACAACATGGGCATGTGTTCGAACCCTCTGGTTGGTTTGGAGTGTGAT…	MESSSSGTTSSTIQTSSGSEESLMEQRKRKRMLSNRESARRSRMKKQKLLDDLTAQVNHLKKENTEIVTSVSITTQHYLTVEAENSVLRAQLDELNHRLQSLNDIIEFLDSSNNNNNNNMGMCSNPLVGLECDDFFVNQMNMSYIMNQPLMASSDALMY*
59	Arabidopsis thaliana	ATHA_59	AT4G35040.4	AtbZIP19	F	Chr4	16680323-16682558	ATGGAAGACGGTGAGCTTGATTTCTCCAATCAGGAAGTGTTTTCGAGTTCGGAGATGGGTGAATTACCACCTAGCAATTGTTCGATGGATAGTTTCTTTGATGGGCTTTTAATGGATACTAATGCTGCTTGTACCCACACTCACACCTGTAACCCCACTGGACCAGAGAACACTCATACTCACACGTGCTTCCATGTCCACACCAAGATTCTCCCGGATGAGAGCGATGAAAAAGTTTCTACTGATGATACAGCTGAGTCTTGTGGGAAGAAGGGTGAAAAGAGACCTTTGGGAAACCGGGAAGCGGTTAGAAAGTATAGAGAGAAGAAGAAGGCTAAAGCTGCTTCTTTGGAGGATGAGGTTGCAAGGCTTAGGGCGGTGAATCAGCAGCTGGTGAAG…	MEDGELDFSNQEVFSSSEMGELPPSNCSMDSFFDGLLMDTNAACTHTHTCNPTGPENTHTHTCFHVHTKILPDESDEKVSTDDTAESCGKKGEKRPLGNREAVRKYREKKKAKAASLEDEVARLRAVNQQLVKRLQNQATLEAEVSRLKCLLVDLRGRIDGEIGSFPYQKPMAANIPSFSHMMNPCNVQCDDEVYCPQNVFGVNSQEGASINDQGLSGCDFDQLQCMANQNLNGNGNGSFSNVNTSVSNKRKGGHRASRAV*
60	Arabidopsis thaliana	ATHA_60	AT4G35900.1	AtbZIP14	A	Chr4	17004522-17006308	ATGTTGTCATCAGCTAAGCATCAGAGAAACCATAGACTCTCTGCTACAAACAAGAACCAGACTCTCACCAAAGTTTCTTCCATTTCATCCTCATCACCATCGTCTTCTTCTTCATCATCATCAACCTCATCATCATCTCCTTTACCTTCTCAAGACTCTCAAGCCCAGAAGAGATCTCTTGTCACCATGGAAGAAGTTTGGAATGACATCAACCTTGCTTCCATCCACCACCTAAACCGACACAGCCCTCATCCACAACACAACCACGAGCCAAGGTTCAGGGGCCAAAACCACCACAACCAAAACCCTAACTCAATCTTCCAAGATTTTCTCAAAGGATCTTTGAACCAGGAACCAGCACCCACAAGCCAGACCACGGGTTCTGCGCCTAATGGCGAT…	MLSSAKHQRNHRLSATNKNQTLTKVSSISSSSPSSSSSSSSTSSSSPLPSQDSQAQKRSLVTMEEVWNDINLASIHHLNRHSPHPQHNHEPRFRGQNHHNQNPNSIFQDFLKGSLNQEPAPTSQTTGSAPNGDSTTVTVLYSSPFPPPATVLSLNSGAGFEFLDNQDPLVTSNSNLHTHHHLSNAHAFNTSFEALVPSSSFGKKRGQDSNEGSGNRRHKRMIKNRESAARSRARKQAYTNELELEVAHLQAENARLKRQQDQLKMAAAIQQPKKNTLQRSSTAPF*
61	Arabidopsis thaliana	ATHA_61	AT4G36730.1	AtbZIP41	G	Chr4	17309612-17312488	ATGGGAACGAGCGAAGACAAGATGCCATTTAAGACTACCAAACCAACATCTTCGGCTCAGGAAGTTCCTCCCACACCGTATCCAGATTGGCAAAATTCAATGCAGGCTTATTATGGCGGAGGAGGTACTCCAAATCCTTTTTTCCCATCCCCAGTTGGATCTCCTAGTCCTCACCCCTATATGTGGGGTGCTCAACACCATATGATGCCGCCTTATGGCACCCCAGTTCCGTACCCAGCAATGTATCCCCCGGGGGCAGTCTATGCTCATCCTAGCATGCCCATGCCTCCTAATTCTGGTCCTACCAACAAGGAGCCTGCGAAGGACCAAGCTTCTGGCAAGAAGTCAAAGGGGAACTCGAAAAAAAAGGCTGAAGGAGGTGATAAAGCGCTCTCTGGT…	MGTSEDKMPFKTTKPTSSAQEVPPTPYPDWQNSMQAYYGGGGTPNPFFPSPVGSPSPHPYMWGAQHHMMPPYGTPVPYPAMYPPGAVYAHPSMPMPPNSGPTNKEPAKDQASGKKSKGNSKKKAEGGDKALSGSGNDGASHSDESVTAGSSDENDENANQQEQGSIRKPSFGQMLADASSQSTTGEIQGSVPMKPVAPGTNLNIGMDLWSSQAGVPVKDERELKRQKRKQSNRESARRSRLRKQAECEQLQQRVESLSNENQSLRDELQRLSSECDKLKSENNSIQDELQRVLGAEAVANLEQNAAGSKDGEGTN*
62	Arabidopsis thaliana	ATHA_62	AT4G37730.1	AtbZIP07	S	Chr4	17723639-17725037	ATGACTCAAAAGCTGTTTATACAGTATAGTCTACGGTCTTACATCGTATTTTGGAAATATGACCAAATTACCCCTTGGTTTGTCCATAAATATCAAGCTCCAACAATGCAATTCTTCCCTTTTCCCCTTCTAATTTCTCTCATCTCTCTATTAGAAAAATTATTAGCAATTATGTTGTCCACTGCACCGGCCTTTTCATTCTCCGAACCGGGTTTGGTTAATCAATTCTCGGGTTTCCAAACCGGGTTCACTCCTTGGGAATGGGATTGCTCTGATCTCTTTTTCGTGGACCAAATGTCTCTTGAACCGGCCATCCCTAGTCCTTGTTATGGTGAATCCGACACTGGTTCCGTCAAAATTAATTCCGGTTCTCATGACATGAAAACCGGTTCTGACGAA…	MTQKLFIQYSLRSYIVFWKYDQITPWFVHKYQAPTMQFFPFPLLISLISLLEKLLAIMLSTAPAFSFSEPGLVNQFSGFQTGFTPWEWDCSDLFFVDQMSLEPAIPSPCYGESDTGSVKINSGSHDMKTGSDESCAGFVKINPRCDDADISNDLPCSQADEPDSDDTKQLTAITNFGSGENNHNRKKMIQPEMTDERKRKRMESNRESAKRSRMRKQSHIDNLREQVNRLDLENRELGNRLRLVLHQLQRVNSDNNRLVTEQEILRLRLSEMRRILIIRQLQQQQQWELHNRRMIMTEQNHPHLQ*
63	Arabidopsis thaliana	ATHA_63	AT4G38900.3	AtbZIP29	I	Chr4	18139237-18141726	ATGGGTGATACAGAGAAGTGTAACAGTGATATGATCCAGAGACTTCATTCATCTTTCGGCACTACTTCTTCTTCCATTCCCAAAAATCCCATTTCTCAGCTCGATTTAAACCCTAATTTCATCCGCTCATCAGCTCCTCAATTCTCCAAGCCTTTCAGTGACAGTGGCAAACGAATCGGTGTTCCTCCGTCGCACCCCAACTTAATCCCACCGACTTCTCCGTTTTCTCAGATCCCGACCACCCGACAACCCGGTTCGCATAATTTTAACCCGGGAGGAGCTAATCATTCACGGTCAATGTCACAGCCCAACTCTTTCTTCTCTTTTGACTCCTTACCTCCGTTAAGCCCTTCTCCGTTTCGAGATCACGATGTTTCAATGGAGGATAGAGATTCCGGC…	MGDTEKCNSDMIQRLHSSFGTTSSSIPKNPISQLDLNPNFIRSSAPQFSKPFSDSGKRIGVPPSHPNLIPPTSPFSQIPTTRQPGSHNFNPGGANHSRSMSQPNSFFSFDSLPPLSPSPFRDHDVSMEDRDSGVFNSNHSLPPSPFTRCNSTSSSSLRVGESLPPRKSHRRSNSDIPSGFNSMPLIPPRPLERSFSGGECADWSKSNPFVKKESSCEREGVGEREAMDDLFSAYMNLENIDVLNSSEADDSKNGNENRDDMESSRASGTKTNGSDTEGESSSVNESANNNMNSSGEKRESVKRRAAGGDIAPTTRHYRSVSVDSCFMEKLSFGDESLKPPPSPGSMSRKVSPTNSVDGNSGAAFSIEFNNGEFTAAEMKKIMANDKLAEMAMSDPKRVK…
64	Arabidopsis thaliana	ATHA_64	AT5G04840.1	AtbZIP79	E	Chr5	1405181-1407962	ATGTCAAGGCCTGCTCCGCTTCCACCTCGTTGCCCGATTCCAAAGAAACTTTCTTTGAGTCCAGTTGCAGATACATTCTACTCTTCTTCCTCACCCATTGAATCATACATTGGTCAATACAAGTCTTCTACTCAAGATTCCAGGCTCGAAGATCAACCTGCTTGGCTTGATGAGTTGCTCTGTGACAAAACTGATGGGTTGCTCACTAGAGGAGGTCCTCTGCGCCGCTCAGCTAGCGACTCAGTTGTGCTTTTGGGAGACATTTCTGCTACTTTTTCTGGTTTTGATCAAAGTGAGGATGAAGAAAGTTTGAGTTCTGAAGCTTGTGGGGACTTGGAGTCTGCTTGTGTATATGGTCCCAACTCGCCAAGAGCAAAGAACAACTCTAGCTTCTCTAAC…	MSRPAPLPPRCPIPKKLSLSPVADTFYSSSSPIESYIGQYKSSTQDSRLEDQPAWLDELLCDKTDGLLTRGGPLRRSASDSVVLLGDISATFSGFDQSEDEESLSSEACGDLESACVYGPNSPRAKNNSSFSNNPIASAFSDYGSQTPPQNLDDTVKGINRSPVAENACGSMGIPNAKRNPGQRSRVRKLQYIAELERTVGMLQTVEADLSVRVASLLQTRATLSLENSQLKQQMAILKQDKLIREGEYQLLKKEAQRLKSGLGYLGSTNNSNRLVRSYSAGSNVAPRTASSHLDWNLLDLTKLNLN*
65	Arabidopsis thaliana	ATHA_65	AT5G06839.2	AtbZIP65	D	Chr5	2120527-2126454	ATGCAAGGTCATCACCAGAATCATCATCAACACTTATCATCATCCTCCGCCACGTCTTCCCATGGAAACTTCATGAACAAAGATGGGTATGATATTGGAGAGATAGACCCATCACTCTTCCTCTATCTTGATGGACAAGGACATCATGATCCTCCATCAACTGCTCCTTCTCCTTTACATCATCATCACACAACTCAGAATTTGGCGATGAGACCTCCAACATCGACGCTCAACATCTTTCCATCTCAGCCTATGCACATAGAGCCACCTCCTTCTTCTACACACAATAAGGAAGGGAACCGCAAGGGTCTTGCCTCATCGGACCATGACATACCTAAATCGTCAGACCCTAAAACATTGAGAAGACTAGCACAAAACAGAGAAGCAGCAAGAAAAAGC…	MQGHHQNHHQHLSSSSATSSHGNFMNKDGYDIGEIDPSLFLYLDGQGHHDPPSTAPSPLHHHHTTQNLAMRPPTSTLNIFPSQPMHIEPPPSSTHNKEGNRKGLASSDHDIPKSSDPKTLRRLAQNREAARKSRLRKKAYVQQLESCRIKLTQLEQEIQRARSQGVFFGGSLIGGDQQQGGLPIGPGNISSAEAAVFDMEYARWLEEQQRLLNELRVATQEHLSENELRMFVDTCLAHYDHLINLKAMVAKTDVFHLISGAWKTPAERCFLWMGGFRPSEIIKVIVNQIEPLTEQQIVGICGLQQSTQEAEEALSQGLEALNQSLSDSIVSDSLPPASAPLPPHLSNFMSHMSLALNKLSALEGFVLQADNLRHQTIHRLNQLLTTRQEARCLLAVAEY…
66	Arabidopsis thaliana	ATHA_66	AT5G06950.4	AtbZIP20	D	Chr5	2151022-2154521	ATGGCTGATACCAGTCCGAGAACTGATGTCTCAACAGATGACGACACAGATCATCCTGATCTTGGGTCGGAGGGAGCACTAGTGAATACTGCTGCTTCTGATTCGAGTGACCGATCGAAGGGAAAGATGGATCAAAAGACTCTTCGTAGGCTTGCTCAAAACCGTGAGGCAGCAAGGAAAAGCAGATTGAGGAAGAAGGCTTATGTTCAGCAGCTAGAGAACAGCCGCTTGAAACTAACCCAGCTTGAGCAGGAGCTGCAAAGAGCAAGACAGCAGGGCGTCTTCATTTCAGGCACAGGAGACCAGGCCCATTCTACTGGTGGAAATGGTGCTTTGGCGTTTGATGCTGAACATTCACGGTGGTTGGAAGAAAAGAACAAGCAAATGAACGAGCTGAGG…	MADTSPRTDVSTDDDTDHPDLGSEGALVNTAASDSSDRSKGKMDQKTLRRLAQNREAARKSRLRKKAYVQQLENSRLKLTQLEQELQRARQQGVFISGTGDQAHSTGGNGALAFDAEHSRWLEEKNKQMNELRSALNAHAGDSELRIIVDGVMAHYEELFRIKSNAAKNDVFHLLSGMWKTPAERCFLWLGGFRSSELLKLLANQLEPMTERQLMGINNLQQTSQQAEDALSQGMESLQQSLADTLSSGTLGSSSSGNVASYMGQMAMAMGKLGTLEGFIRQADNLRLQTLQQMIRVLTTRQSARALLAIHDYFSRLRALSSLWLARPRE*
67	Arabidopsis thaliana	ATHA_67	AT5G06960.3	AtbZIP26	D	Chr5	2154748-2157710	ATGCAGTTCGATGAAGGGCATTTGGGTATCGGTGCTTCTGATTCTAGTGACCGTTCAAAGAGTAAAATGGATCAAAAGACGCTTCGTAGGCTCGCTCAAAACCGTGAGGCTGCAAGGAAAAGCAGATTGAGGAAGAAAGCATATGTTCAGCAGCTAGAGAACAGTCGATTGAAGCTAACACAACTTGAGCAGGAGCTACAAAGAGCACGGCAACAGGGTGTCTTTATCTCAAGCTCTGGAGACCAAGCCCATTCTACCGCTGGAGATGGGGCAATGGCATTTGATGTAGAATACAGACGATGGCAGGAAGATAAAAACAGACAGATGAAGGAGCTGAGTTCTGCTATAGATTCTCACGCGACTGATTCTGAGCTTCGGATAATTGTAGATGGAGTAATA…	MQFDEGHLGIGASDSSDRSKSKMDQKTLRRLAQNREAARKSRLRKKAYVQQLENSRLKLTQLEQELQRARQQGVFISSSGDQAHSTAGDGAMAFDVEYRRWQEDKNRQMKELSSAIDSHATDSELRIIVDGVIAHYEELYRIKGNAAKSDVFHLLSGMWKTPAERCFLWLGGFRSSELLKLIASQLEPLTEQQSLDINNLQQSSQQAEDALSQGMDNLQQSLADTLSSGTLGSSSSGNVASYMGQMAMAMGKLGTLEGFIRQADNLRLQTYQQMVRLLTTRQSARALLAVHNYTLRLRALSSLWLARPRE*
68	Arabidopsis thaliana	ATHA_68	AT5G07160.1	AtbZIP72	M	Chr5	2219971-2220709	ATGAGTTTCCCTGTGGTTGCGACATCGTTTGGAGTGTCCCAAAGTGGCAGCCAAGCGGGAAAGAAGAAAGGTGGTTACGTCAACTATGAAGTCGAGCCAGGCTTCACCATTCGTATGCGTCAGAATATTGATCCCACCACGGACCCTAAGATACTCAAACGGATAATTTCGAACCGTGTTGCGGCTCAAAAGTCTAGGTGGAAGAAGGTTCAATATCTTGATGCTCTAGTGAAGAGATCCATGGAGCTCCAAAGAGAGGTGAGTGAGTTGCGTTCCCAACTAGCGATTACCAGTGAACAAAAACGATATCTAGAAAATGAGCAAAGGCAGCTAAAGGAGTGTATCTCTGCTCGGGTTCAACATTGTATCAACAGCGATGGTGTCATTGAGGAGTATAAA…	MSFPVVATSFGVSQSGSQAGKKKGGYVNYEVEPGFTIRMRQNIDPTTDPKILKRIISNRVAAQKSRWKKVQYLDALVKRSMELQREVSELRSQLAITSEQKRYLENEQRQLKECISARVQHCINSDGVIEEYKTEIERLKTNLAPLSNLT*
69	Arabidopsis thaliana	ATHA_69	AT5G08141.1	AtbZIP75	S	Chr5	2619008-2619669	ATGTTCCAACAAAACTTACATGATGAAGACGACGTCCATGTTCAAGACCATGTCTACAATCATGACCAGTACCATCATCAACAACCGAATGTTGTGACGGATGAAGAGAAGAGGTTAAGGAGAATGGCGTCTAATCGAGAATCAGCAAGAAGAACGCGGATGCGTGAGCGGATGATGAAAGAGGGGTTGCAAATGCAAGTAAAACAACTCATGGCGTACAATCAATTCTTGTATAACAAATATATTAGCTTGTTGGAGTACAATCACCAGATCTTGCAAGAGAATTCACAGCTCAAAGAGACAGTTTCATCCTTTCATGATCAATATACTATATCTTATGGAAACCATGAAGGTATACTTGGAAACACCAATGATTTCGATTTAAACCAACTATCTTCG…	MFQQNLHDEDDVHVQDHVYNHDQYHHQQPNVVTDEEKRLRRMASNRESARRTRMRERMMKEGLQMQVKQLMAYNQFLYNKYISLLEYNHQILQENSQLKETVSSFHDQYTISYGNHEGILGNTNDFDLNQLSSYQPS*
70	Arabidopsis thaliana	ATHA_70	AT5G10030.5	AtbZIP57	D	Chr5	3137304-3139624	ATGAATACAACCTCGACACATTTTGTTCCACCGAGAAGGTTTGAAGTTTACGAGCCTCTCAACCAAATCGGTATGTGGGAAGAAAGTTTCAAGAACAATGGAGACATGTATACGCCTGGCTCTATCATAATCCCGACTAACGAAAAACCAGACAGCTTGTCAGAGGATACTTCTCATGGGACAGAAGGAACTCCTCACAAGTTTGACCAAGAGGCTTCCACATCTAGACATCCTGATAAGATACAGAGAAGGCTAGCACAGAATCGAGAGGCAGCTAGGAAAAGTCGTTTGCGCAAGAAAGCTTATGTTCAGCAGCTAGAGACTAGCCGGTTAAAGCTAATTCATTTAGAGCAAGAACTCGATCGTGCTAGACAACAGGGTTTCTATGTGGGGAACGGA…	MNTTSTHFVPPRRFEVYEPLNQIGMWEESFKNNGDMYTPGSIIIPTNEKPDSLSEDTSHGTEGTPHKFDQEASTSRHPDKIQRRLAQNREAARKSRLRKKAYVQQLETSRLKLIHLEQELDRARQQGFYVGNGVDTNALSFSDNMSSGIVAFEMEYGHWVEEQNRQICELRTVLHGQVSDIELRSLVENAMKHYFQLFRMKSAAAKIDVFYVMSGMWKTSAERFFLWIGGFRPSELLKVLLPHFDPLTDQQLLDVCNLRQSCQQAEDALSQGMEKLQHTLAESVAAGKLGEGSYIPQMTCAMERLEALVSFVNQADHLRHETLQQMHRILTTRQAARGLLALGEYFQRLRALSSSWAARQREPT*
71	Arabidopsis thaliana	ATHA_71	AT5G11260.2	AtbZIP56	H	Chr5	3593361-3595003	ATGCAGGAACAAGCGACTAGCTCTTTAGCTGCAAGCTCTTTACCATCAAGCAGCGAGAGGTCATCAAGCTCTGCTCCACATTTGGAGATCAAAGAAGGAATTGAAAGCGATGAGGAGATACGGCGAGTGCCGGAGTTTGGAGGAGAAGCTGTCGGAAAAGAAACTTCCGGTAGAGAATCTGGATCGGCGACCGGTCAGGAGCGGACACAGGCGACTGTCGGAGAAAGTCAAAGGAAGCGAGGGAGGACACCGGCGGAGAAAGAGAACAAGCGGCTGAAGAGGTTGTTGAGGAACAGAGTTTCAGCTCAGCAAGCAAGAGAGAGGAAAAAGGCTTACTTGAGCGAGTTGGAAAACAGAGTGAAAGACTTGGAGAACAAAAACTCTGAACTTGAAGAGCGA…	MQEQATSSLAASSLPSSSERSSSSAPHLEIKEGIESDEEIRRVPEFGGEAVGKETSGRESGSATGQERTQATVGESQRKRGRTPAEKENKRLKRLLRNRVSAQQARERKKAYLSELENRVKDLENKNSELEERLSTLQNENQMLRHVRFVDLTVDLTCNVNAFAICFLIYHSTGLSHLRV*
72	Arabidopsis thaliana	ATHA_72	AT5G15830.1	AtbZIP03	S	Chr5	5168194-5169365	ATGCAGCCAAATTATGATAGCTCAAGTCTTAACAACATGCAACAACAAGACTACTTCAACTTGAACAACTACTACAACAACTTAAACCCTTCAACCAATAACAACAACCTCAATATCCTCCAATACCCTCAAATTCAAGAACTCAACCTACAATCTCCGGTAAGCAACAACTCCACAACTTCCGATGACGCAACTGAAGAAATCTTCGTCATCAACGAGAGGAAGCAAAGACGTATGGTATCTAACAGAGAGTCAGCAAGAAGATCAAGAATGAGAAAGCAAAGACACTTAGATGAGCTTCTCTCACAGGTTGCTTGGCTTCGAAGCGAGAACCACCAGCTTTTAGATAAGCTTAACCAAGTCTCCGACAACAATGATCTTGTTATTCAAGAGAACTCG…	MQPNYDSSSLNNMQQQDYFNLNNYYNNLNPSTNNNNLNILQYPQIQELNLQSPVSNNSTTSDDATEEIFVINERKQRRMVSNRESARRSRMRKQRHLDELLSQVAWLRSENHQLLDKLNQVSDNNDLVIQENSSLKEENLELRQVITSMKKLGGGIHDKYSSPSSMDELDQDFSSITDDPRTHHPS*
73	Arabidopsis thaliana	ATHA_73	AT5G24800.1	AtbZIP9	C	Chr5	8515200-8516669	ATGGATAATCACACAGCTAAAGACATTGGTATGAAGAGAAGTGCTTCTGAGCTGGCTCTACAAGAGTATCTCACTACAAGCCCTCTAGACCCTTGTTTCGACCTCATGAACCGGGATTACACTTGTGAGTTAAGAGATAGTCTTTTGTGGTCTGAGGGATTGTTTCCGGCTGGACCTTTTCGCGATGCACAGTCCTCAATCTGCGAGAATCTGTCAGCTGATAGTCCAGTGTCAGCCAATAAACCTGAGGTAAGAGGAGGAGTTAGGAGAACCACAAGTGGATCTTCTCATGTTAACTCTGATGACGAAGATGCCGAGACAGAAGCAGGGCAATCTGAAATGACTAATGATCCCAATGATCTGAAACGTATTAGAAGGATGAACTCAAACAGGGAATCA…	MDNHTAKDIGMKRSASELALQEYLTTSPLDPCFDLMNRDYTCELRDSLLWSEGLFPAGPFRDAQSSICENLSADSPVSANKPEVRGGVRRTTSGSSHVNSDDEDAETEAGQSEMTNDPNDLKRIRRMNSNRESAKRSRRRKQEYLVDLETQVDSLKGDNSTLYKQLIDATQQFRSAGTNNRVLKSDVETLRVKVKLAEDLVARGSLTSSLNQLLQTHLSPPSHSISSLHYTGNTSPAITVHSDQSLFPGMTLSGQNSSPGLGNVSSEAVSCVSDIWP*
74	Arabidopsis thaliana	ATHA_74	AT5G28770.4	AtbZIP63	C	Chr5	10796459-10798235	ATGGAAAAAGTTTTCTCCGACGAAGAAATCTCCGGTAACCATCACTGGTCGGTTAATGGAATGACGTCGTTGAATCGCAGTGCTTCCGAATGGGCATTCAATCGTTTCATACAAGAATCCTCCGCCGCTGCAGACGACGGAGAATCTACGACGGCGTGTGGTGTTTCCGTCTCCTCTCCTCCTAATGTTCCTGTAGATTCAGAGGAATACAGAGCATTTCTCAAGAGTAAACTTAATCTTGCTTGTGCTGCTGTCGCCATGAAAAGGGGAACTTTCATCAAACCTCAGGATACTTCTGGTAGATCTGACAATGGTGGAGCCAATGAATCAGAACAAGCCTCTCTTGCTTCTTCCAAAGCTACACCAATGATGAGCAGTGCTATAACAAGTGGATCTGAG…	MEKVFSDEEISGNHHWSVNGMTSLNRSASEWAFNRFIQESSAAADDGESTTACGVSVSSPPNVPVDSEEYRAFLKSKLNLACAAVAMKRGTFIKPQDTSGRSDNGGANESEQASLASSKATPMMSSAITSGSELSGDEEEADGETNMNPTNVKRVKRMLSNRESARRSRRRKQAHLSELETQVCYSRSVLILSPLTLFSSLVRQSPFRVGFTASCREFKTHEGSH*
75	Arabidopsis thaliana	ATHA_75	AT5G38800.1	AtbZIP43	S	Chr5	15538141-15538889	ATGCAACCATCCACCAACATTTTTAGCCTCCATGGTTGTCCACCTTCGTACCTTTCCCATATTCCTACATCCTCACCATTTTGCGGACAAAACCCTAATCCATTCTTCAGCTTCGAAACTGGCGTGAACACTTCACAGTTCATGAGTTTGATCAGCAGCAACAACTCGACCTCAGATGAAGCAGAAGAGAATCATAAGGAGATAATAAATGAGAGGAAGCAAAAGAGGAAGATATCTAACAGAGAATCGGCAAGAAGATCGCGTATGAGGAAGCAGAGACAAGTGGATGAGCTTTGGTCACAGGTGATGTGGCTTAGGGATGAGAATCATCAGCTGCTTCGTAAGCTTAACTGCGTTTTAGAGTCTCAAGAGAAGGTTATTGAAGAGAATGTTCAGCTC…	MQPSTNIFSLHGCPPSYLSHIPTSSPFCGQNPNPFFSFETGVNTSQFMSLISSNNSTSDEAEENHKEIINERKQKRKISNRESARRSRMRKQRQVDELWSQVMWLRDENHQLLRKLNCVLESQEKVIEENVQLKEETTELKQMISDMQLQNQSPFSCIRDDDDVV*
76	Arabidopsis thaliana	ATHA_76	AT5G42910.1	AtbZIP15	A	Chr5	17203742-17205380	ATGGATAGTTACTGGAGACTTAAAAACTTGGTGAATGATTTGCCAGTTAGTACTTCTTTAAGCCGACAAGGATCAATATACTCATGGACAGTAGATCAGTTTCAGACCAGCTTAGGGTTAGATTGTGGATCAATGAACATGGATGAGTTGGTTAAGCATATATCAAGTGCTGAAGAAACACAAGAGGGGTCGCAGAGGCAAGGCTCAACTACTCTGCCTCCAACACTTAGCAAACAAAATGTTGGTGAAGTTTGGAAATCTATCACAGAGGAAAAACACACCAATAACAATGGAGGAGTAACAAACATTACTCATCTTCAGGGACAACAAACCTTAGGGGAAATCACTCTTGAAGAGTTTTTCATCCGTGCTGGAGCAAGAGGAGGTAATACCAATGGT…	MDSYWRLKNLVNDLPVSTSLSRQGSIYSWTVDQFQTSLGLDCGSMNMDELVKHISSAEETQEGSQRQGSTTLPPTLSKQNVGEVWKSITEEKHTNNNGGVTNITHLQGQQTLGEITLEEFFIRAGARGGNTNGGSIHDSSSSISGNPHTSLGVQIQPKAMVSDFMNNMVPRSHDSYLHQNVNGSMSTYQPQQSIMSMPNGYSYGKQIRFSNGSLGSGNQSLQDTKRSLVPSVATIPSEAITCSPVTPFPTLNGKQKINGESSLLSPSPYISNGSTSTRGGKINSEITAEKQFVDKKLRRKIKNRESAARSRARKQAQTMEVEVELENLKKDYEELLKQHVELRKRQMEPGMISLHERPERKLRRTKSDIK*
77	Arabidopsis thaliana	ATHA_77	AT5G44080.1	AtbZIP13	A	Chr5	17737874-17739949	ATGACGTCGTTTCAGGTGATGCGTTCTTCAAATTCGAGAAACTCGGATCTATCTCGTCGCATCTCTTCTGCTTCTACTTCTTCTTCGTCTATAAGACCTCAACAACAGTTCCGGCGAGATCTAACAAGTGTCGGTTACGGCGGAAGAAACGACGGATTATACAGTTCAAATTCGATGACGGTCGAAGGGATTTTACACGATACTTTCGCATCAGATCCACCAGCACCAACGGAATCTTCACTCTTAGATGCGTCGATAAATCTGATGGATGCTTCTCCAGCACCAATGGAGATAACAACAACGACGGCTTCTGATGTTGTGGATCACGGCGGAGGAACGGAGACGACGCGTGGTGGGAAGAGTGTTGATGAGATTTGGAGAGAGATGGTATCAGGAGAA…	MTSFQVMRSSNSRNSDLSRRISSASTSSSSIRPQQQFRRDLTSVGYGGRNDGLYSSNSMTVEGILHDTFASDPPAPTESSLLDASINLMDASPAPMEITTTTASDVVDHGGGTETTRGGKSVDEIWREMVSGEGKGMKEETSEEIMTLEDFLAKAAVEDETAVTASAEDLDVKIPVTNYGFDHSAPPHNPFQMIDKVEGSIVAFGNGLDVYGGGARGKRARVMVEPLDKAAAQRQRRMIKNRESAARSRERKQAYQVELEALAAKLEEENELLSKEIEDKRKERYQKLMEFVIPVVEKPKQQPPRFLRRIRSLEW*
78	Arabidopsis thaliana	ATHA_78	AT5G49450.1	AtbZIP01	S	Chr5	20051829-20052735	ATGGCAAACGCAGAGAAGACAAGTTCAGGTTCCGACATAGATGAGAAGAAAAGAAAACGCAAGTTATCAAACCGCGAATCTGCAAGGAGGTCGCGTTTGAAGAAACAGAAGTTAATGGAAGACACGATTCATGAGATCTCCAGTCTTGAACGACGAATCAAAGAGAACAGTGAGAGATGTCGAGCTGTAAAACAGAGGCTTGACTCGGTCGAAACGGAGAACGCGGGTCTTAGATCGGAGAAGATTTGGCTCTCGAGTTACGTTAGCGATTTAGAGAATATGATTGCTACGACGAGTTTAACGCTGACGCAGAGTGGTGGTGGCGATTGTGTCGACGATCAGAACGCAAACGCGGGAATAGCGGTTGGAGATTGTAGACGTACACCGTGGAAATTGAGT…	MANAEKTSSGSDIDEKKRKRKLSNRESARRSRLKKQKLMEDTIHEISSLERRIKENSERCRAVKQRLDSVETENAGLRSEKIWLSSYVSDLENMIATTSLTLTQSGGGDCVDDQNANAGIAVGDCRRTPWKLSCGSLQPMASFKT*
79	Arabidopsis thaliana	ATHA_79	AT5G60690.1	X	St	Chr5	24396981-24402195	ATGGAGATGGCGGTGGCTAACCACCGTGAGAGAAGCAGTGACAGTATGAATAGACATTTAGATAGTAGCGGTAAGTACGTTAGGTACACAGCTGAGCAAGTCGAGGCTCTTGAGCGTGTCTACGCTGAGTGTCCTAAGCCTAGCTCTCTCCGTCGACAACAATTGATCCGTGAATGTTCCATTTTGGCCAATATTGAGCCTAAGCAGATCAAAGTCTGGTTTCAGAACCGCAGGTGTCGAGATAAGCAGAGGAAAGAGGCGTCGAGGCTCCAGAGCGTAAACCGGAAGCTCTCTGCGATGAATAAACTGTTGATGGAGGAGAATGATAGGTTGCAGAAGCAGGTTTCTCAGCTTGTCTGCGAAAATGGATATATGAAACAGCAGCTAACTACTGTTGTT…	MEMAVANHRERSSDSMNRHLDSSGKYVRYTAEQVEALERVYAECPKPSSLRRQQLIRECSILANIEPKQIKVWFQNRRCRDKQRKEASRLQSVNRKLSAMNKLLMEENDRLQKQVSQLVCENGYMKQQLTTVVNDPSCESVVTTPQHSLRDANSPAGLLSIAEETLAEFLSKATGTAVDWVQMPGMKPGPDSVGIFAISQRCNGVAARACGLVSLEPMKIAEILKDRPSWFRDCRSLEVFTMFPAGNGGTIELVYMQTYAPTTLAPARDFWTLRYTTSLDNGSFVVCERSLSGSGAGPNAASASQFVRAEMLSSGYLIRPCDGGGSIIHIVDHLNLEAWSVPDVLRPLYESSKVVAQKMTISALRYIRQLAQESNGEVVYGLGRQPAVLRTFSQRLSRG…
80	Arabidopsis thaliana	ATHA_80	AT5G60830.1	AtbZIP70	S	Chr5	24472639-24473319	ATGGAGTCGTCTAGTGTCCATCGCTCTCATTGTTTCGATATTCTTGATGGAGTCCCACTACACGACGATCATTTCAACTCGGCATTCCTACCAAACACTGACTTTAATGTTCATTTGCAGTCAAACGTATCGACCCGCATCAACAATCAGTCTCACTTAGACCCAAATGCAGAAAACATTTTCCATAACGAAGGTCTTGCTCCAGAAGAAAGAAGAGCAAGAAGAATGGTCTCTAACCGGGAATCTGCAAGGAGGTCACGTATGCGCAAAAAGAAGCAGATCGAAGAGCTGCAACAACAAGTTGAACAACTCATGATGTTGAATCATCACTTGTCTGAGAAAGTCATCAACTTGTTGGAAAGCAACCATCAGATCCTACAAGAGAACTCACAGCTGAAA…	MESSSVHRSHCFDILDGVPLHDDHFNSAFLPNTDFNVHLQSNVSTRINNQSHLDPNAENIFHNEGLAPEERRARRMVSNRESARRSRMRKKKQIEELQQQVEQLMMLNHHLSEKVINLLESNHQILQENSQLKEKVSSFHLLMADVLLPMRNAESNINDRNVNYLRGEPSNRPTNSPFASSTMIDAMYATSDYYSSNYLLAFVCRY*
81	Arabidopsis thaliana	ATHA_81	AT5G65210.5	AtbZIP47	D	Chr5	26057814-26061104	ATGAATTCGACATCGACACATTTTGTGCCACCGAGAAGAGTTGGTATATACGAACCTGTCCATCAATTCGGTATGTGGGGGGAGAGTTTCAAAAGCAATATTAGCAATGGGACTATGAACACACCAAACCACATAATAATACCGAATAATCAGAAACTAGACAACAACGTGTCAGAGGATACTTCCCATGGAACAGCAGGAACTCCTCACATGTTCGATCAAGAAGCTTCAACGTCTAGACATCCCGATAAGATACAAAGACGGCTTGCTCAAAACCGCGAGGCTGCTAGGAAAAGTCGCTTGCGCAAGAAGGCTTATGTTCAGCAACTGGAAACAAGCAGGTTGAAGCTAATTCAATTAGAGCAAGAACTCGATCGTGCTAGACAACAGGGATTCTAT…	MNSTSTHFVPPRRVGIYEPVHQFGMWGESFKSNISNGTMNTPNHIIIPNNQKLDNNVSEDTSHGTAGTPHMFDQEASTSRHPDKIQRRLAQNREAARKSRLRKKAYVQQLETSRLKLIQLEQELDRARQQGFYVGNGIDTNSLGFSETMNPGIAAFEMEYGHWVEEQNRQICELRTVLHGHINDIELRSLVENAMKHYFELFRMKSSAAKADVFFVMSGMWRTSAERFFLWIGGFRPSDLLKVLLPHFDVLTDQQLLDVCNLKQSCQQAEDALTQGMEKLQHTLADCVAAGQLGEGSYIPQVNSAMDRLEALVSFVNQADHLRHETLQQMYRILTTRQAARGLLALGEYFQRLRALSSSWATRHREPT*
82	Capsicum annumm	CANN_1	CA.PGAv.1.6.scaffold773.31	X	G	chr01	24517820-24525412	ATGGGGAGCAGTGATATTGACAAATCCTCTAAGGAGGCAAAGGAGGCAAAGACTCCCAATTCACAGGAGCAGGCTTCATCTGCCGCCACTGGTACAGTAAATCCAGATTGGTCCGCTTTTCAGGGTTATTCTCCGATGCCTCCACATGGGTTCATGGCTTCAAGTCCTCAAGCACACCCTTACATGTGGGGAGTTCAGCATCTTATGCCACCCTATGGTACTCCACCACATCCTTATGTCGCAATGTATCCCCATGGTGGAATATATGCTCATCCATCTATTCCTCCGGGATCTTACCCCTTTAGCCCCTTTGCGATGCCTTCTCCAAACGGCATTGCCGAAGTTGCAGTCAACACCTCTGGCAATGCTGAGGTAGATGGTAAATCATCTGAGGGAAAG…	MGSSDIDKSSKEAKEAKTPNSQEQASSAATGTVNPDWSAFQGYSPMPPHGFMASSPQAHPYMWGVQHLMPPYGTPPHPYVAMYPHGGIYAHPSIPPGSYPFSPFAMPSPNGIAEVAVNTSGNAEVDGKSSEGKEKLPIKRSKGSLGSLNMITGKNNEHVKTSGASANGGYSKSAESRSGEGSSEGSDANSQNESPMKSAGGQDSAEEASQNGNSAHSSQNGGISAPHSLVNQTMAIMPMSAVGAGGVPGPTTNLNIGMDYWNAAASPSIPAIHGKVPPASVAGGMVTAGSRDIVQSQMWIQDERELKRQRRKQSNRESARRSRLRKQAECDELAQRAEVLKEENASLRTELSRLRSEHDQLAAQNASLKERLGEVPGRDDPRPSRNDIPLNNGIQHSSQ…
83	Capsicum annumm	CANN_2	CA.PGAv.1.6.scaffold64.10	X	D	chr01	81202024-81220807	ATGAAAAACTTGGGTAATGTTAAACAGATTTTGGGCATGAGGATTGCTTATCTCAAGGACAAAAGGAAGCATTACTTGTCACAGGAGAAGTGCATTGAATGTGTACTGGAGCACTTCAACATAAAGAATGCTAAGGTTGTTAACACACCTCTTGCTGGTCATATGGAGTTGAGCAAGAAGATGTGTCCTATAACAAATGAGGAGAAATTGGCATCTACGTTGCTTGGACTCTTTAAAAATGTCAGCAGGTGTGAGAGGCTAGCGTTGGATGGTTTTAGGCGGGGTAGGGGTAGGCCGAAGAAGTACTGGGGTGAGGTGATTAGGCGGGACATGGAGCAGTTACAGCTCACCGAGGACATGACCCTAGATAGGAAGTTTCATAACTCTCAAGCACTGGGT…	MKNLGNVKQILGMRIAYLKDKRKHYLSQEKCIECVLEHFNIKNAKVVNTPLAGHMELSKKMCPITNEEKLASTLLGLFKNVSRCERLALDGFRRGRGRPKKYWGEVIRRDMEQLQLTEDMTLDRKFHNSQALGAVSDGSDKTRDQKTLRRLAQNREAARKSRLRKKMRVAKMRMLRWICGHTRRDTIRNEDIQDKGIYVSSSGDQSQSMSGNGALAFDVEYARWLEEHNRRVIELRGAVSSHAGDGELRIIVDGILAHYDDLFRIKGNAAKADVFHILSGMWSTPAERCFLWLGGFRSSELLKLLINQLEPLTEQQLLAINNLQQSSQQGEDALSQGIEALQESLAETLARSLEPSGSSGNVAYYMGQMAMAMGKLGTLEGFIRQMLNALLVQLCVFTI…
84	Capsicum annumm	CANN_3	CA.PGAv.1.6.scaffold714.8	CabZIP10	A	chr01	88421814-88422340	ATGAACAATCAGGAGAGAGAACCAACTCTTGGCGAGACAACTTTGGAGGACTACTTGGTGAAAGCTGGGCTTTTTGTTGCTGATGCATCTTTAGGACATACGATGTCACTGGATAATCCTGCAGCAATGCAAAATTATGTGCCTCCGACAGGCTTGTCACCATCCCCTTCGCTGTCTGATACACCGATTTCTGGTCGGAAGAGGGGTGCTAGGGACATTGATAAGACTATTGATCGGAGACTAAGGAGAAAGATTAAGAATAGAGAGTCAGCTGCACGTTCCCGAGCCAGAAAACAGGCTTACCACAATGAGCTGGTGAACAAGGTTTCACATCTGGAAGAGGAAAACATGAAGCTTAAGAAAGAGAAGGTATGGGTTCTCTCATTATCTATACTGAGG…	MNNQEREPTLGETTLEDYLVKAGLFVADASLGHTMSLDNPAAMQNYVPPTGLSPSPSLSDTPISGRKRGARDIDKTIDRRLRRKIKNRESAARSRARKQAYHNELVNKVSHLEEENMKLKKEKVWVLSLSILRLKMLDISFDKKHF*
85	Capsicum annumm	CANN_4	CA.PGAv.1.6.scaffold777.13	CabZIP11	S	chr01	211320294-211320728	ATGGCTTCAGCTCAGCAACCAGCTAGTTCGGGCTCTGATGGCCAGAGATATGCTAATTATGATGAGAGAAAACGAAAGAGAATGGAGTCCAACCGTGAATCTGCAAGGCGGTCACGGATGAGGAAACAGCAGCATTTGGAGGAGTTGATGAGTGAATTGACGCAGCTGCAAAATCAGAACACTATTTGGAGCCAGAGGATTGATGCTGTTGGAAAAAACTATCACACAGTCGAAGCAGAGAACAATGTCTTGAGGGCTCAAATTGCTGAACTGACTGAACGCTTGGATTCCCTTAATTCGCTCACTCGTTTCTGGGCTGATGCTAATGGACTTGCTGTGGACATCCCTGAAATTCCAGACGCTTTGCTTGAGCCCTGGCAGCTCCCTTGCCCAATTCAA…	MASAQQPASSGSDGQRYANYDERKRKRMESNRESARRSRMRKQQHLEELMSELTQLQNQNTIWSQRIDAVGKNYHTVEAENNVLRAQIAELTERLDSLNSLTRFWADANGLAVDIPEIPDALLEPWQLPCPIQPITASADMLQF*
86	Capsicum annumm	CANN_5	CA.PGAv.1.6.scaffold137.28	CabZIP13	G	chr01	296585927-296598719	ATGGGTAGCGGTGAGATGGATAAATCCTCAAAAGAGGCGAAGGAAGCAAAAGAGTCGAAGACTCCCAATTCACAGGAGCAGACTTCTACTCCTACCGCTGGCCCAGTCAATCCAGATTGGTCTGGCTTTCAGGCATATTCTCCTATGCCTCCACATGGGTTTATGACATCAAGTCCTCAAGCACCACACCCCTATATGTGGGGAGTCCAGCAATTTATGCCAACCTATGGTACTCCACCACATCCATACGTTGCAATGTATCCCCATGGTGGTATATATGCTCATCCATCTATGCCTCCGGGATCTTACCCTTTCAGTCCTTTTGCAATGCCTTCTCCAAATGGCGTTGCTGAAGCTTCAGTTAGCAACCCTGGTAATGTCGAAGTGAACGGTAAGTCA…	MGSGEMDKSSKEAKEAKESKTPNSQEQTSTPTAGPVNPDWSGFQAYSPMPPHGFMTSSPQAPHPYMWGVQQFMPTYGTPPHPYVAMYPHGGIYAHPSMPPGSYPFSPFAMPSPNGVAEASVSNPGNVEVNGKSSEGKEKLPIKRSRGSLGSLNMITGKNNGPGKTSGASANGVHSKSAESGSEGSSEGSDAHSQNESPMNSGGRQDSADTSQNGNAAHGSQNGGTAATHSTINQTMAIVSAPGAGGITGPATNLNIGMDYWGAATSSPIPAMHGRVPVSVAGGLVTAGSRDSVQSQMWIQDERELKRQKRKQSNRESARRSRLRKQAECDELAQRAEVLKEENAALRAEVNRIRSDYEHLLAQNASLKERLGEVPGEEVPRTGQDDHHSSQTESHQGDQ*
87	Capsicum annumm	CANN_6	CA.PGAv.1.6.scaffold940.2	CabZIP12	C	chr01	298589727-298598514	ATGGAGAAGAAAATGGCTAATTTTGCTAGTAGAAACATGAAGAAAAGTCCTTCTATATTGGCTATGGAAGAATTTTATGGACAAGATGCAAAAAATAGTGATGGTTTTGGAGCAAGTGATCATCATCATCAACAACAAAGTACCAATAATAATAATAACATTAATCATCATGACAACAACAACAATAACAACAACAATGGTCATCATCATGCTCAACTTTTTGGTGATATTTGTTCTATTGATCCCTCATTTACTATGAGAAATCAGGACATATTAAATGGTTTCTCAAATTGTGGAATGACAGAAAGGCCCCTTTGGTCTCCAAATATTACTCCCAAGCAATCCAGTATATCTGTTACTGTGGATTCACAATCTTCAATATGTGCTGGGAGTCCAACA…	MEKKMANFASRNMKKSPSILAMEEFYGQDAKNSDGFGASDHHHQQQSTNNNNNINHHDNNNNNNNNGHHHAQLFGDICSIDPSFTMRNQDILNGFSNCGMTERPLWSPNITPKQSSISVTVDSQSSICAGSPTPTIIMTPKARDNQTMGANSGSYQSDDDDVDGEVGPCEQSTDPLDIKRIRRQASNRESARRSRRRKQAHMADLENQVDQFRGENESLFKQLADATQQYKDALTNNRVLKSDVEALRAKVKLAEDMVARGSLTSSLSHLLQNYLNTPQSLGTTTTTNNNNTMCRLDNVSPTITVPGEDSWGVISSQNVMIGVDNNNVNAFNQNGAMSDTVSCVSDVWSWE*
88	Capsicum annumm	CANN_7	CA.PGAv.1.6.scaffold53.41	X	G	chr02	11346582-11353437	ATGGGGACTGGGGAAGAGAGCACCCCTACAAAGCCTTCGAAAGCTACTTCAACTCAGGAGGCACAATCTACACCTTCATATCCTGATTGGTCTTCTATGCAGGCTTATTATGGTGCTGGAGCTGCACCTCCCTTCTTTCCCTCAACTGTTGCTTCTCCTACTCCTCACCCATACATGTGGGGAAGCCAGCATCCGCTTATGCCTCCTTATGGAGCTCCAGTCCCATATCCTGCTTTATATCCTCCTGCTGGAGTTTATGCTCATCCTAATATGCCCATGACTCCAAACACACTGCAGACAAATCCAGAATCAGATAATAAGGCACCTGATGGTAAGGACCAGAATACAAGCAAAAAATTGAAGGGAAGTTCAGGCGGCAAGACAGGAGAGAGTGGAAAA…	MGTGEESTPTKPSKATSTQEAQSTPSYPDWSSMQAYYGAGAAPPFFPSTVASPTPHPYMWGSQHPLMPPYGAPVPYPALYPPAGVYAHPNMPMTPNTLQTNPESDNKAPDGKDQNTSKKLKGSSGGKTGESGKAASGSGNDGARRSAESGSEGSSHDNDENDNHEFSADKSRSFDLMLANGANAQNNPATGNPVAMPATNLNIGMDLWNAPSAGPGMIKMRSNQPGFSPASGLGREWIQDERELKRLKRKQSNRESARRSRLRKQAECEELQHKVETLSNENHGLKEELRKLSEECEKLTSENNSIKDELTRLCGPEAVSKLESSSNAMHLQSNVEEANS*
89	Capsicum annumm	CANN_8	CA.PGAv.1.6.scaffold225.18	CabZIP16	A	chr02	23084160-23093887	ATGCGGTCGTCAAGTAGTGAAGAACACCAACAACTCAAAGGTCTAGACAAGAACCTTGCAACTTATTCTTCAAAATCATCATCACCATCATCATCCACATCTTCTAGCAATAATTACCCAATTAATCCTGTACTAATAAATAGTAAAACCATGGAAGAAGTTTGGAAAGACATAAATCTTTCTTCTCTCAATGACCACACTTGTTCTAGAGCTCACATGGATCCACAAAGTACTACTGCTAGCACAATCAATTTTGGTGGCATGATTTTGCAAGATTTATTGGCAAGACCATTAGCTAGTGACCCTCCAACAGCAACAACAGCCTATGGTTCCCCTGTTCCCCCCCCTCCACCTGTTACCATGTTGACATTGAATTCTGGCCCTGAACTTCATTTCTTT…	MRSSSSEEHQQLKGLDKNLATYSSKSSSPSSSTSSSNNYPINPVLINSKTMEEVWKDINLSSLNDHTCSRAHMDPQSTTASTINFGGMILQDLLARPLASDPPTATTAYGSPVPPPPPVTMLTLNSGPELHFFSSLNPLRKTSICLPKNISNSSTFEALASPAAGRNANGKKRHPESDNHSGDQKNKRMIKNRESAARSRARKQESFASLCMPFKIECVMFLRLTQKKVKLLWSNSYEKSFQELKTRLTSAPTLKLSDGTNGFVVYCDASRVGLGYVLMQRGKVIAYASRQLKLHEKNYLTHDLELATVVFALKIWRHYLYGVHIDVFTDHKILQYMFSQKGLNLHQRR*
90	Capsicum annumm	CANN_9	CA.PGAv.1.6.scaffold1520.1	X	St	chr02	124397163-124403472	ATGGATACTAGCAAGTATGTGAGGTATACACCAGAACAAGTGGAGGCTTTGGAGAGGGTTTATGCAGAATGTCCAAAGCCAACTTCTATTAAGAGGCATCAGCTCATTAGGGAGTGCTCCATTCTTTCAAATGTTGACCCTAAACAGATCAAAGTATGGTTTCAGAACAGAAGATGTCGCGAGAAACAGAGAAAGGAGGCATCTCATCTCCAAACTGTTAATAGGAAGCTGACTGCTATGAACAAACTGTTGATGGAAGAGAATGACAGATTGCAGAAGCAAGTTTCGCATCTTGTGTATGATAATGGATATATGCGTCAGCAGCTACATACTCAGGTTAACAGTACGACCACGGATACGTGCTGTGAGACTGTGGTCGTGAGTGGTCAGCAGCAGCAA…	MDTSKYVRYTPEQVEALERVYAECPKPTSIKRHQLIRECSILSNVDPKQIKVWFQNRRCREKQRKEASHLQTVNRKLTAMNKLLMEENDRLQKQVSHLVYDNGYMRQQLHTQVNSTTTDTCCETVVVSGQQQQQNPMAQHPQRDVNSPTGLLAIAEETLAEFLSKATGTAVDWVQMIGMKPGPESIGIVTVSRNCDGVAARACGLVSLEPMKVAEILKDRPSWYHDCRCLDILSVIPTGKGGTIELIYLQTYAPTTLASARDFWTLRYTTSLEDGSLVICERSLTPTTGGPPATSSVRATMLPSGYLIRPFEGGGSIIHIVDHIDLDACSVPEVLRPLYESSKILAQKMTMAAFRYVRQIAQETNGEIQYVGGRQPAALRAFSQRLCRGFNNAVSGFID…
91	Capsicum annumm	CANN_10	CA.PGAv.1.6.scaffold569.64	CabZIP9	B	chr02	147934134-147936693	ATGGCGAATTCAAATCCTCCATCAGACCAAGTCATTCTTGACGACCTCGAACTCGACCTCGATCTCGACTTATCATTCGACGACATCATCCCTCCATCCGAAGCTGATGCTGCAGCTTTTCTCAACCCGAATCCTCTCACTTTTCCCTATTCATGTTTGGAACCCGATCNTCCGAATCCAGTGGGTCAACCCGGGAGTCAACTGATCCAAACCCGAGCATTCAAATCCTCGCCGGAACTACGTCATGTTTCCGTCGACCTGTCGGAGGCAGATCATAGCTTCGGTAATCAAAGTTCCAGTGGATCCCATGTTTTGAGCCCCGCAGCCGATGTCTCTGAATACCTCAATGTGTCATCGCTGTCGCCGGAATCGGAGTCGTCTAATCACGAGGATTTGAAC…	MANSNPPSDQVILDDLELDLDLDLSFDDIIPPSEADAAAFLNPNPLTFPYSCLEPDXPNPVGQPGSQLIQTRAFKSSPELRHVSVDLSEADHSFGNQSSSGSHVLSPAADVSEYLNVSSLSPESESSNHEDLNCSSPESLGSGNCGSNIVNNSVTSSLNFVDSSIECGLVEHKVKLEEVNVKYSKCSSSILKRKKVSGDCLDLKDVSKYQKSDFVVECSNVNSGGDDDKKKARLMRNRESAQLSRQRKKHYVEELEDKVRTMHSTIQDLNVKISYIMSENASLRSQMGCSSVALQMPPPPPGMYPNPGVMYPWMHCAPPYMVKPQGSQVPLVPIPRLKPQAAAPPSKSSKKVENKKTEVKTKRVASVSFLGLLFFMLLFGGLVPIVNLRYSGLKEPLTS…
92	Capsicum annumm	CANN_11	CA.PGAv.1.6.scaffold890.4	CabZIP17	A	chr02	151878365-151879452	ATGTGGTCATCAAGCAGTGACAATAGGGGGCTATCAGCTTCTTCTAAATCAACATCATCATCTGCTTCTTCTTCATCTCATTCCCCATTTTCTCCAGGACTTAAAACCATGGAAGAAGTGTGGAAAGACATTAATCTTTCTTCTCTTCAAGACCATACTACTAATATTTACTCTACAGATCATGATCATCATCAAGGTGCTAATTTTGGTGGAGCCATTTTACAAGATTTCTTGGCTAGACCTTTTGCTAATGAACCTTCACCACCAGCAGCTGCTGCAGCAACAGCCTCTCCTGTACCAGCTTCAACTATGCTGAATTTGAACTCTGTTCCGGAGTTTCACTTCTTTGATAACCCTTTAATGCAAAACTCAATCTTGCACCCATCAACTGATAGTTGT…	MWSSSSDNRGLSASSKSTSSSASSSSHSPFSPGLKTMEEVWKDINLSSLQDHTTNIYSTDHDHHQGANFGGAILQDFLARPFANEPSPPAAAAATASPVPASTMLNLNSVPEFHFFDNPLMQNSILHPSTDSCQVVPNVSGRKRVVPETDNNSGGDRKNQRMIKNRESAARSRARKQESAIHFFIFIAYMNELEMEVAHLVEENARLKKQQQQLRLAAAAQVPRKNSLYRASTAPF*
93	Capsicum annumm	CANN_12	CA.PGAv.1.6.scaffold358.125	CabZIP18	G	chr02	154925026-154932787	ATGAGAGAAGAGAGCACTCCTACAAAGCCTTCAAAGCCAGCTTCAACTCAGGAGACACCAACTGCACCTTCGTATCCTGATTGGTCAAGCTCTATGCAGGCTTATTATAGTGCTGGAGCTACTCCTCCCTTCTTTGCCTCACCCGTTGCTTCTCCTGCTCCCCACCCGTACTTGTGGGGAGGTCAGCATCCTCTTATGCCTCCTTATGGGACTCCAGTCCCATATCCAGCTTTATATCCTCCTGCCGGAGTTTATGCTCATCCTAACATGGCCACGCCATCTCCAAATACTGCGCAGGCAAATCCAGAATCAGATGGGAAGGGTACGGAAGGGAAGGATCGGAATTCTAGCAAAAAGTTAAAGGCCTCTTCTAGTAGCAAGGCAGGGGACAACGGGAAA…	MREESTPTKPSKPASTQETPTAPSYPDWSSSMQAYYSAGATPPFFASPVASPAPHPYLWGGQHPLMPPYGTPVPYPALYPPAGVYAHPNMATPSPNTAQANPESDGKGTEGKDRNSSKKLKASSSSKAGDNGKVTSGSGNDGATQSDESRSEGTSDTNDENDNHEFAANKKGSFDQMLADGASAQNNPATVNYPTSIHGNPVTVPATNLNIGMDVWNASSAGPGAIQMQPNASGPVVGHEGRINDQWMQDERELKRQKRKQSNRESARRSRLRKQAECEELQRRVEALTNENHSLKDELQGLSEECEKLTSENNSIKEELARWCGPDAVSKLESSGTNATHAQSNVEEAS*
94	Capsicum annumm	CANN_13	CA.PGAv.1.6.scaffold358.35	CabZIP19	S	chr02	156202444-156202878	ATGACTTCTCCTGGCGGACCTTCTTCATCAGGGTCAGAGGATCTACAACAACTAATGGATCAAAGGAAGCGCAAAAGAATGATATCGAACAGGGAATCAGCAAGAAGATCAAGAATGAAGAAGCAGACACATTTGAATGAATTAATGGCTCAAGTGAATCAACTTAAGGAACAAAATAACCAAACTGTCACAAACATAAATAGGGTCACACAGGTTTATTTGAATGTGGAGGCACAGAATTCTGTTCTCAGAGCACAAATGGCGGAGTTGAGTCATAGGCTTCAGTCTTTAAATGAGATTATAAATTGCATCAACTCAGCAAACTCAACAATTGATGAAACACAGGTTATTGGTGATGATGGTTTCTTGAATCCTTGGAATTTGCTTCATGTTAATCAG…	MTSPGGPSSSGSEDLQQLMDQRKRKRMISNRESARRSRMKKQTHLNELMAQVNQLKEQNNQTVTNINRVTQVYLNVEAQNSVLRAQMAELSHRLQSLNEIINCINSANSTIDETQVIGDDGFLNPWNLLHVNQPIMASADAFMY*
95	Capsicum annumm	CANN_14	CA.PGAv.1.6.scaffold1343.5	CabZIP20	S	chr02	159655622-159656302	ATGTTGTCCACTTTGTCGGCCACTACTCTGTCCTCCGATGGACTTTTTTCTAATTCATTCGCGGCTTTTGATGGTGGTTTTACTCCTTGGGAATGTATCGAACCGGCTTTTCTATTTCCACGAGATGTGGAAGAAGANNNNNNNNNNNNNNNNNAAGAGCCGGTTCTTTCTCCCAAGCAATCCCCACCAACTGAACCGGTTATTTTGAACTCCGATTCAGGGTCTGATGACTCCAAACCGAATTCCATTCACTCTAGTTCCGGTTCAGATGAACCGAACCGGAATAATAACAACAACTCGAACCGCTGTCTTGACGAGAGGAAACGCCAGCGTACGACATCGAACCGGGACATAGACGAGAGAAAGCGCCGTCGTATGGTATCGAACCGGGAATCAGCT…	MLSTLSATTLSSDGLFSNSFAAFDGGFTPWECIEPAFLFPRDVEEXXXXXXXEPVLSPKQSPPTEPVILNSDSGSDDSKPNSIHSSSGSDEPNRNNNNNSNRCLDERKRQRTTSNRDIDERKRRRMVSNRESARRSRMRKQKHLENLRNQVNRLKIGNRELMNRLRLITHQYQIFQCDNERLKTESAILGQRLEDIREILRARQLQQQFNSYFAWPCSNYMEQRPH*
96	Capsicum annumm	CANN_15	CA.PGAv.1.6.scaffold497.38	CabZIP21	S	chr02	163353617-163354159	ATGCAACCCACTGATGTCACAGACTTCTACTACCTACTTCCTTCTAACTCAACTCAATTCCCATCTCAATCCTGTGCGAACTATAACACGTCCACATTTCAGCTAAATAGGCTCTTGAACCCTTTATGTCATCTTCAGATCACTCCCCAAGTTCAAGACCTCAATCCACAACTAACATGTTTCAACAGTAACTCTACATCAGACGAAGCTGATGAGCAACAGTTAACTCTAATAAATGAACGTAAACAGAGAAGAATGATATCTAATAGAGAGTCTGCAAGGAGATCACGAATGCGCAAGCAGAGGCACCTAGATGAGCTTTGGGCACAGGTTGTTTGGCTCCGAAATGAGAATCACCAGCTCCTGGACAAACTAAATCATGCTTCTGAGCGTCATGAT…	MQPTDVTDFYYLLPSNSTQFPSQSCANYNTSTFQLNRLLNPLCHLQITPQVQDLNPQLTCFNSNSTSDEADEQQLTLINERKQRRMISNRESARRSRMRKQRHLDELWAQVVWLRNENHQLLDKLNHASERHDQVLQENAQLKNEASELRQMITDMQLSSPCPISRALENEPCSGLPQNE*
97	Capsicum annumm	CANN_16	CA.PGAv.1.6.scaffold317.1	CabZIP40	H	chr03	191469534-191482716	ATGCAAGAGCAAGCGACAAGTTCCATTGCGGCTAGTTCTTTACCTTCAAGTAGTGAGAGATCTTCTAGCTCAGCTCTCCATCTTGAACTCAAAGAAGGCATGGAGAGTGATGATGAGATCAGAAGAGTGCCGGAGATGGGTGGAGAAGCCACCGGAACCACCTCAGCTTCTGGCAGAGATGGAACTTCCGCCGCCGGTCAAGCTCAACCATCAGCTGGGACTCAAAGGAAGAGAGGAAGAAGCCCAGCTGACAAAGAAAACAAGAGGTTAAAAAGGTTGCTGAGAAATAGAGTATCGGCACAGCAAGCAAGGGAGAGGAAGAAAGCATACTTGATAGATCTGGAAGCAAGGGTGAAGGAATTGGAAACAAAGAATGCAGAACTTGAAGAGAGGTTGTCC…	MQEQATSSIAASSLPSSSERSSSSALHLELKEGMESDDEIRRVPEMGGEATGTTSASGRDGTSAAGQAQPSAGTQRKRGRSPADKENKRLKRLLRNRVSAQQARERKKAYLIDLEARVKELETKNAELEERLSTLQNENQMLRHILKNTTAGAQEGRK*
98	Capsicum annumm	CANN_17	CA.PGAv.1.6.scaffold438.3	X	St	chr03	280662551-280670187	ATGGCTTCCTGCAAGGATGGTAAGTCAGTGATGGATAATGGAAAGTATGTCCGGTATACACCTGAGCAGGTTGAAGCACTTGAGAGGCTTTACCATGATTGTCCTAAACCAAGTTCCATGCGCCGTCAGCAGCTTATTCGAGAATGTCCTATTCTTTCTAACATCGAACCTAAGCAAATCAAAGTTTGGTTTCAGAATCGAAGATGCAGGGAGAAACAGAGAAAAGAGGCCTCAAGGCTTCAGACAGTGAATAGGAAGCTGACGGCAATGAACAAGCTATTAATGGAAGAAAATGACAGATTACAGAAACAAGTTTCTCAATTGGTGTATGAAAATGGCTACTTTCGCAGGCAAACTCACAGTACACCGCTTGCTACAAAAGATACCAGTTGTGAATCA…	MASCKDGKSVMDNGKYVRYTPEQVEALERLYHDCPKPSSMRRQQLIRECPILSNIEPKQIKVWFQNRRCREKQRKEASRLQTVNRKLTAMNKLLMEENDRLQKQVSQLVYENGYFRRQTHSTPLATKDTSCESVVTSGQHHLTSQHPPRDASPAGLLSTAEETLTEFLSKATGTAVEWVQMPGMKPGPDSIGIIAISHGCTGVAARACGLVGLEPTRVSEILKDRPSWFRDCRTVDVINVLPTANGGTIELLYMQLYAPTTLAPARDFWLLRYTTVMDDGSLVVCERSLGNTQNGPSMPPVPNFVRAEILPSGYLIRPCEGGGSIIHIVDHMNLEAWCVPEVLRPLYESSAVLAQKTTVAALRYLRQIAQEVSQTNVTNWGRRPAALRALGQRLSRGFN…
99	Capsicum annumm	CANN_18	CA.PGAv.1.6.scaffold568.5	CabZIP5	S	chr04	29303397-29303897	ATGGCTTCTTTTAGTGGAACAACTTCAGGATCAAGCCAAGAAGATCTCCAACAACTAATGGACCAAAGGAAACGCAAAAGATTTATATCAAATAGGGAATCAGCAAGAAGATCAAGAATGAGGAAGCAAAAACATTCTGATGATTTAACAGCTCAAGTAAATCAACTTAAGGAACAAAAAAATCAAATTGCAACAAATATTAACATGCTCACATATCTTTTCTTGAATGTGAAAGCGGAAAATTCAATTCTCAGAGCTCAATTGGTTGAGTTAAGCCACAGGCTGCAGTCCCTTAATGAGATGATAAGTTGCCCACACTCTCCATACCTCGAAAAATGTACTACTTTTGAAGGACCTGAAACGTACCCTGCAACCGTTATACAGGGTCCGAGCAACATA…	MASFSGTTSGSSQEDLQQLMDQRKRKRFISNRESARRSRMRKQKHSDDLTAQVNQLKEQKNQIATNINMLTYLFLNVKAENSILRAQLVELSHRLQSLNEMISCPHSPYLEKCTTFEGPETYPATVIQGPSNIAFNYHHDLDDFLNLWNLLNVNQPIMASSDSFIY*
100	Capsicum annumm	CANN_19	CA.PGAv.1.6.scaffold544.4	CabZIP30	E	chr04	118112408-118114365	ATGGAAAGTTTAAATGGTTCATCAAGCTTGAAAAACTTCTCCTTTTCGAACAAGCAGTTAATCATGGACTCCACTTCTCCCTTTCTCCAGTCCTACGAAGATTCAAATATGGATGGATCAAATTTAAAAGAAAAGTCAACAGAGGGATCGAGTCACCATCATCGGTGTAACTCTGAGAGCTTTCTTATAGAGGAGCAACCTTCTTGGCTTGATGACCTTTTGAATGAACCTGCAGAGACAACGACAGTTGTACACAAAGGTCATCGACGTTCAGCAAGTGACACTTTTGCATACGTAGGAGCAGCTGCAGAGAGGTTAAACACGAGGGAAGAAGCTAAAAATAAGAATGTAAGTATAGGAGCTTCTTGGGGTTCAGTCAGTTATGTGAGTTGCAAGGAT…	MESLNGSSSLKNFSFSNKQLIMDSTSPFLQSYEDSNMDGSNLKEKSTEGSSHHHRCNSESFLIEEQPSWLDDLLNEPAETTTVVHKGHRRSASDTFAYVGAAAERLNTREEAKNKNVSIGASWGSVSYVSCKDLSAVPYDTRPNSSHEQKFNKAVQELNGAPSVSNEKHNMREINNSQNQEGSSERSNNAQAKHSMSKADAKRAKQQSAHRSRVRKLQHIAELERTVQALQAEGSELSAELEFLDQQNIILSMENRALRQRLDSLSQEQLIKHLEQEMLERELTRLQTLYQMQRQQLQQQHQQPQQQNHCKHRRNKSRDLEAQCANLSIKNNEASSSRIQVAGSVRM*
101	Capsicum annumm	CANN_20	CA.PGAv.1.6.scaffold175.6	CabZIP29	I	chr04	193216822-193222489	ATGGACCCGAAGTTCGCCGGAAAGCCCATACCCGCTCCATTTCTAGCGGGTCGAACTGACCTTGACCAGATGCCCGATACTCCTACCCGTATTGCCCGTCACCGTCGAGCTCAATCGGAGACTTTCTTCCGGTTCCCGGACTTTGACGATGATATTCTACTGGACGACGTCGTTGCTGACTTCAACATCGACATTTCTGCGCCGTCGGCTGATACACATATGCAGCAGCCGGCTAATTCGGCTGACTCGTCATCAACCGGACCCCTTTTTGCTGGACCGTCTGGTGGTGATCAAAACCCTAGACCGTTGAATCATTTCCGGAGTCTGTCAGTTGACGCTGACTTTTTTGATGGGTTGGAGTTTGGTGATGTTGGAGCAGCGACAACACCGGCGGCGGCG…	MDPKFAGKPIPAPFLAGRTDLDQMPDTPTRIARHRRAQSETFFRFPDFDDDILLDDVVADFNIDISAPSADTHMQQPANSADSSSTGPLFAGPSGGDQNPRPLNHFRSLSVDADFFDGLEFGDVGAATTPAAAKEEEKWVMGSGSGSGSRHRHSNSMDGSFSTASFEAESSVKKAMAPDRLAELALIDPKRAKRILANRQSAARSKERKIRYTNELERKVQTLQTEATNLSAQITVLQRDNSGLTTENKELKLRLQALEQQAHLRDALNEALREELQRLKIAAGQMTAANGTRGPRPHFPPQPQSFVQCGNLHSQQQQQPQSNTSSQNIGGQTQPSLMNFSNRG*
102	Capsicum annumm	CANN_21	CA.PGAv.1.6.scaffold617.4	CabZIP27	D	chr04	209764957-209768187	ATGATCATGACTTCTCCAACAACTCAATTTGCCCCCACAAGAAGGATGGGCATATATGAACCATTTCACCAGATGAGTGTGTGGGAAGACGCGTTTAGAGGTGACATTGTGCCTAGCGTTGATGCATCTATGATTTCACAGCCAAACGACAGGCCAGATGACAAGTCAGGGTATACATCCGGTGAACAACATATACCCTCTGGCTCTGGAGACAATCAAGCACCGAGGAGGAGTATTTCAGAGAAGGTACAGCGACGTTTAGCACAAAATCGTGAAGCTGCCCGTAAAAGCCGTATGCGGAAAAAGGCGTATGTTCAGCAGCTGGAAACCAGCCGTTTAAAGCTGGCCCAACTCGAATTGGAGCTTGAGAGAGCTAGACAGCAGGGATTATACATGTTA…	MIMTSPTTQFAPTRRMGIYEPFHQMSVWEDAFRGDIVPSVDASMISQPNDRPDDKSGYTSGEQHIPSGSGDNQAPRRSISEKVQRRLAQNREAARKSRMRKKAYVQQLETSRLKLAQLELELERARQQGLYMLGSNSNMGILGTINPGIAAFEIEYSHWVEEQQKKNAELRSILQSPVSDLELQLLVENVLSHYFNLFRMKADAAKADVFYLMSGMWRTSVERFFLWIGGFKPSELINVVMPQLEPLTDQQIIKVCNLRHCCQQAEDALTQGMDKLHQTLAQSILNMNTGAGNYASQMVSSMENLEALESFVNQADHLRQQTLQQMSIILTTRQAARGLLAFGEYLQRLRALSSLWAARPREPT*
103	Capsicum annumm	CANN_22	CA.PGAv.1.6.scaffold1239.10	CabZIP26	S	chr04	227836353-227836775	ATGATGTTTGAAGATCCGGTTCACTACCATCTCCCGGTTCATGAAGATGTTCTTTCACCTAGTGATATCGATGAAATATTATCTCTTTTACAACCCGAGCTCCCGGTTCATGAGTCTACATCCGGTTCAGAAACAACCCGGTTGGTCTTTTCCTTAGAAGAACGTAAGCGACGTCGAAAGATATCGAACCGGGAGTCAGCACGCCGGTCCAGATTCCGTCAGAAAAAACACGTAGATAATCTTACGGAACAAGTAGACCGGCTTAAAGTCGAGAACCGGGAGTTAAAAAACCGGTTATGTGTAGTTACTCATCATTGTCAAGCGGCTCAAAGTGAAACGGACCGGCTTATTCTCGAGTCAATTGTACTTCAACAACAACTAGCCGGTTTATGTCAAATC…	MMFEDPVHYHLPVHEDVLSPSDIDEILSLLQPELPVHESTSGSETTRLVFSLEERKRRRKISNRESARRSRFRQKKHVDNLTEQVDRLKVENRELKNRLCVVTHHCQAAQSETDRLILESIVLQQQLAGLCQILNPMQLQ*
104	Capsicum annumm	CANN_23	CA.PGAv.1.6.scaffold851.45	CabZIP24	S	chr04	234977374-234977865	ATGGCTACTTCGAGTGGAAATTCATCTCAAATTCAGACTAATTCAGGTTCCGAAGAGGTGTTAATGGTGGTTGATGAGAGGAAGAGAAAGAGAATGCAATCGAATCGCGAATCAGCAAGGAGATCAAGAATGAGAAAACAAAAGCATCTTGATGATTTAAATGGTCAAGTAACACAACTGAAGAATGAAAACAGTAACATCCTCAACAGCATCAATGTTACAACACAACAGTATTCTAATGTTGAGGCTGAGAATTCTGTCTTAAGAGCACAAATGATGGAGTTAACTCAAAGGTTGCAATCTCTTAATGAAATCCTTAATTACATCGACAACAATAATAATAACAACAACATTAATAATAATAATAATAATAATAATGGGGGTTTTGAGATTAATAAT…	MATSSGNSSQIQTNSGSEEVLMVVDERKRKRMQSNRESARRSRMRKQKHLDDLNGQVTQLKNENSNILNSINVTTQQYSNVEAENSVLRAQMMELTQRLQSLNEILNYIDNNNNNNNINNNNNNNNGGFEINNYHQDDFQINPWNMMYVNQPIMASADMLYQY*
105	Capsicum annumm	CANN_24	CA.PGAv.1.6.scaffold1271.7	CabZIP23	I	chr04	236735614-236738977	ATGGCTCAGTCTAATTCTAAGCCACCTATGAGTAGCCATAATTTTGGTGTGGGAGGTTCGCATGTGAGGTCTTTATCTCAACCAGGGATTTTTTCGAATAGCTGTTTGCCCCCATTGAGTCCTTTGCCGCCTCCCAGTGAGTCGTCGATGGCGTTGGTTCAGTCTAGCTTGAAGGATACATCTATGGAGGAAGTAGATGTGAATTCCAAAGGTGTAGGAGTTGTGTCTTCCTTTACAAGGGATGGTCTTCCTCCGAGGAAGGGGCATCGTCGATCTAATAGTGATGTTCCATTGGGATTTTCGGCTATGATTCAGTCTTCACCTCAGTTGATGCCTATAGGTGTCCAGAAAGTTTTTGGGAGAGCAGTGAGTCTTGGGGATAGCTTGGGGAGGGATAAA…	MAQSNSKPPMSSHNFGVGGSHVRSLSQPGIFSNSCLPPLSPLPPPSESSMALVQSSLKDTSMEEVDVNSKGVGVVSSFTRDGLPPRKGHRRSNSDVPLGFSAMIQSSPQLMPIGVQKVFGRAVSLGDSLGRDKFTGRNGKIDGEEIGERKPKGEITDELLFSYMNLDNIDALNSSGTEDRDKDSMVSGTKVSGCDSSNNEAESVLKGNTVSIQPTGLREGFKRSADANIAPAARHFRSLSMDSAIGNFHYGDESPNLPNSLVMRSGQLSPSNSGNESSSKHNFDFGNAEFSEAEMKKIMADERLAEIAVSDPKRAKRILANRLSAARSKERKLRYISELEHKVQKLQSEATTLSTQVTILQKDLVEISSLNSELKFRIQSMEQQAQLRDALHESLTAEV…
106	Capsicum annumm	CANN_25	CA.PGAv.1.6.scaffold1330.24	CabZIP22	K	chr04	239634025-239636486	ATGGTAGATAACATCGATGATATCGTTGCGCACATCAACTGGGACGATGTAGATCACATCTTCCACAACGTTCTACACGATGATCTCTTCACTGTTCATGATCCCGATCCCTCTGCACCCAATTTCCAGGATATCGAGCAGCTTCTCATGAACGACGACGATGTTGAAGATCAAGCTGATACTCAATTTGCGGCCGAATTTCTCTCTGATGTGCTGGTTGATTCACCTGCTCAGTCCCATCAATCTCCCTCTGCTGAAGAAGAAGCCTTTGGATTCCCCGATTCCAAGGTTTCTAGTGGATCCGAGGACGACAAGGACAAGGTCTCTCACTCGCCCTCTGACGCTGACGAACTGAACAACGATGACCCCATAGATAAGAAGCGAAAGAGGCAATTGAGG…	MVDNIDDIVAHINWDDVDHIFHNVLHDDLFTVHDPDPSAPNFQDIEQLLMNDDDVEDQADTQFAAEFLSDVLVDSPAQSHQSPSAEEEAFGFPDSKVSSGSEDDKDKVSHSPSDADELNNDDPIDKKRKRQLRNRDAAVRSRERRKLYVRDLELKSKYFESECKRLGFVLQCCLAENQALRFSLQNSSANGVSMTKQESAVLLLESLLLGSLLWFLGISCLLILPSQTWSIPEENQGSRNPGLLVPIKRGKKTSRSLAFLSFMMGKRCKASRSRMKFNPHSLGIVM*
107	Capsicum annumm	CANN_26	CA.PGAv.1.6.scaffold1366.14	CabZIP31	D	chr05	7508677-7513563	ATGAATTCTTCAACATACACTCAGTTCGTTGCCTCAAGAAGGATGGGTATATGCGAGCCACTACATCAAATTGGCATGTGGGATGATTTCAATGCCAGTTGCCCGAGTACATCGGCAACAATGATTCTCGAAGTTGAGAAATGCCTAGAGGAGCAGATACCTATTATGGAGAAAAGATTAGACAATGAGATAGAAGATACTTCGCATGGAACAGTAGGGACTTCTAATAGATATGAAGCAGAAACAAGTAAACCCATCGAGAAGGTACTTCGACGTCTTGCACAAAACCGTGAGGCTGCTCGTAAAAGCCGTTTGCGGAAGAAGGCCTATGTTCAACAGTTAGAAAATAGTAAATTGAAGCTGATTCAATTGGAACAAGAACTAGAACGGGCCAGAAAA…	MNSSTYTQFVASRRMGICEPLHQIGMWDDFNASCPSTSATMILEVEKCLEEQIPIMEKRLDNEIEDTSHGTVGTSNRYEAETSKPIEKVLRRLAQNREAARKSRLRKKAYVQQLENSKLKLIQLEQELERARKQGLYVGGGLDASQLSYSGTASSGTAAFDTEYGQWVEEQNRQTNDLRNALYHSQISEADLRVIVDGCLNHYSNLFRIKATAAKDDVLYIMSGMWKTSAERFFMWIGGFRPSELLKVLTPHLQLLTEQQLREVCNLTQSCQQAEDALSQGMVKLHQILAEAIAAGRLGEGNYSLPQMGPAIEKLEALVRFVNQADHLRQETLQQMSRILNTHQAAQGFLALGEYFERLRVLSSQWATRLREPA*
108	Capsicum annumm	CANN_27	CA.PGAv.1.6.scaffold73.5	CabZIP32	S	chr05	130302832-130303410	ATGATTTCATCAGAGGCTGCAACAATCCACTACTTAGCACAAGAAAACCCCTCATCAATTCCTATTGATTACAGCTTCATGCACAAAACCTTACCAGCATTCCAGTTCAGCACATTCTTGACCAATAACAACATACAAAATTATCAGGCCTCTTTTCCTTTTCAAGATTTCAGTACACAGCCATCATGCATCAGCAGTAACTCGACCTCTGATGAGTCAGAGGAACACCAGCATAGAATCATCGATGAACGAAAGCAGAGGAGAATGATTTCTAACAGGGAATCAGCTAGAAGATCAAGGATGAGGAAGCTGAGGCACCTTGATGAACTCTGGTCCCAAGTGCTTCGTCTTCGAACAGAGAACCACAATCTGATCAATAAGTTAAATCAAGTCGCAGAA…	MISSEAATIHYLAQENPSSIPIDYSFMHKTLPAFQFSTFLTNNNIQNYQASFPFQDFSTQPSCISSNSTSDESEEHQHRIIDERKQRRMISNRESARRSRMRKLRHLDELWSQVLRLRTENHNLINKLNQVAESHEKVVEENMQLKEEASDLRRLLTDIQLASSFDAFSELDEVPCNTADHLKAESSNQSTT*
109	Capsicum annumm	CANN_28	CA.PGAv.1.6.scaffold1280.27	CabZIP4	S	chr06	179368-179802	ATGACTTTGACTCCACAATCCGTGAGTTCTGGTTCGGATGCTGATCCGAGGTATGTAAAGTTTGATGAAAGGAAAATGAAGAGAATGGAATCCAACCGCCAGTCGGCCAAGAGGTCACGGATGAGGAAGCAGCAGCGTTTGGAGGAGTTAAAGAGCGAAACAACTCAGCTGCAGAACCAGAACAGTATCTGCCGCCATAAGATTGATTCTGTCGAAAGGAAGTATCATTCCGTTGACACTGAGAACAACGTGTTGAGGGCTCAACTCGCAGAACTGACTGAACGGTTGAATTCGCTGAACGAACTCACTCAATTCTGGGCTGATACCACTGGATTTCCTGTCGACGTTGCTGAAATTCCCGACATTTTGCTGGAGCCGTGGCAACTGCCGTGCCCAACT…	MTLTPQSVSSGSDADPRYVKFDERKMKRMESNRQSAKRSRMRKQQRLEELKSETTQLQNQNSICRHKIDSVERKYHSVDTENNVLRAQLAELTERLNSLNELTQFWADTTGFPVDVAEIPDILLEPWQLPCPTHAIAASDMFQF*
110	Capsicum annumm	CANN_29	CA.PGAv.1.6.scaffold24.12	CabZIP37	I	chr06	78893055-78906851	ATGCAAGGTCCGTCAAATCTAAATTCCGTCAAGTTACCGAATCAACCGACGTCATTTTCAGAAGCATTCCGTCCATCTCACCACCGCCGAGCTCACTCCGAGGTGAACTTCCGGTTGCCGGAGGATCTAGATCTGGTCTCCGACCCATTCGATGTGCCGGCAGGAAGTTTCGAGGAGATGGGATCGGAGGATGATTTCTTCTCTACCTACATGGACATTGAGAAGCTCACCGGTGGATCTAACCTCGGCGATGCTACTGGTCTCGACAATGCTGGCGCAGGAGGGAGTCAAGTGGGAGCTGAGACTAGTGACGGGGAGAAGAGCATGATGAGGCCACGTCATAGGCATAGTAATTCTGTAGATATCTCAAGTTTATTGCTCAGTGAGAGTATTGAAGCT…	MQGPSNLNSVKLPNQPTSFSEAFRPSHHRRAHSEVNFRLPEDLDLVSDPFDVPAGSFEEMGSEDDFFSTYMDIEKLTGGSNLGDATGLDNAGAGGSQVGAETSDGEKSMMRPRHRHSNSVDISSLLLSESIEAKKAMAPDKLTELWTIDPKRAKRILANRQSAARSKERKARYISELERKVQTLQTEATTLSAQLTLIQRDTTGLTNENTELKLRLQAMEQQAQLRDALNEALKQEVERLKIATGQISASSDAYNSGMQQIPYNRPAFFPHQPQPGPSESQNIQMPQFHHIQGSMSNPRHPLHAGHAQALADAMQQDPLSRFQGLDISSRGSHLVKTEVPSISASQSSSTF*
111	Capsicum annumm	CANN_30	CA.PGAv.1.6.scaffold545.4	CabZIP36	I	chr06	109401759-109407019	ATGCAAGATCCGTCAAATCCAAACTCGATGCAACTGAATCAAACGCCGTCACTTTCCGCCACATTCAGGCCATCTCACCACCGCAGAGCTCACTCGGAGGTTAACTTCCGTCTGCCCGAGGATCTAGATCTGGTATCTGACCCATTCGATGCCTCCGCCGCAAGTTTTGAGGAGATCGGATCTGAGGATGATTTCTTCTCCACTTACATGGACATTGAAAAGCTCGGCACTGGATCTAACCCTACTGATGTTCCAGGATTCAACAATGCTGCTGCTGGAAGTAGTGGTGGACTGGTAGTTGACTGTGGTGATGGAGAGAAGAGTTTTACTAGGCCTCGTCACAGGCATAGCAATTCCGTGGATAGTTCGAGCTTGTTGTTAAGTGAGAGTATTGAAGCT…	MQDPSNPNSMQLNQTPSLSATFRPSHHRRAHSEVNFRLPEDLDLVSDPFDASAASFEEIGSEDDFFSTYMDIEKLGTGSNPTDVPGFNNAAAGSSGGLVVDCGDGEKSFTRPRHRHSNSVDSSSLLLSESIEAKKAMAPDKLAELWTIDPKRAKRILANRQSASRSKERKARYITELERKVQTLQTEATTLSAQLTLFQRDTTQFTNENTELKLRLQAMAQQAQLRDALNEALKQEVERLKMATGELSSSDAYNLGMQHIPYNQSAFFSHQLQPGPNESQNIQMQQFHSLQDSLLAPHRRLPAGHVQALPDTMQQDPLGRFQGLEIGGRGMHLVKTEAPSISASESSSTF*
112	Capsicum annumm	CANN_31	CA.PGAv.1.6.scaffold136.21	CabZIP35	I	chr06	144021925-144032793	ATGGATAAGGATAAGTCTTCGTTGCCTCCATCGGGGAGATACTCATTATTTTCACATCCTGGTAGTAGTTCCAATGTAAAGTCGGAACAACCTGGATTAGTAAATTTACCTCCCTTAGGACCTGGAAATGCTTCAGAATCGGGTCATTGTGGTCATGGTTTGTCGGTGGAGTCAAGCCTATTTAGTAATGATATAAGCCGAATGTCTGATAACCCACCTAGAAAATTTGGTCACCGACGTGCCCACTCAGAAATTCTTACTCTTCCTGATGATATTAGCTTTGATAGTGATCTTGGTGTTGTTGGACTAGATGGACCGTCTCTGTCAGACGAGACTGAGGAAGACATCTTCTCAATGTACCTTGACATGGATAAGCTCAATTCTTCATCGTTGTCTTCT…	MDKDKSSLPPSGRYSLFSHPGSSSNVKSEQPGLVNLPPLGPGNASESGHCGHGLSVESSLFSNDISRMSDNPPRKFGHRRAHSEILTLPDDISFDSDLGVVGLDGPSLSDETEEDIFSMYLDMDKLNSSSLSSDFQVGESSSAAAASGSSQTQGMTSGTNKVAPTVSEKPRVRHQHSQSMDGSTTIKPEMLMSGVEEPSSAETKKATSAAKLAELALIDPKRAKRIWANRQSAARSKERKMRYIAELERKVQTLQTEATTLSAQLTLLQRDTSGLTAENSELKLRLQTMEQQVHLQDALNDALKEEIQHLKALTGQGMANGGPMMNFPASFGGNQQFYSNNQAMHTLLAAQQLQQLQIHSHKQQHQFQQHKLHQFQQQQQQLQHQQPQPLIQQQEPPSQ…
113	Capsicum annumm	CANN_32	CA.PGAv.1.6.scaffold62.51	CabZIP34	I	chr06	190523865-190531199	ATGGACCCTAAGTTCGCCGGAAAGCCCATTCAGGCCCAATTCTATTCGGGTCAAACTGACCTGGACCAGATGCAAGACACTCCAACACGAGCCCGGCACCGCCGTGCCCAATCGGAAACCTTCTTCCGTTTCCCCAGCTTCGACGATGACATGCTTTTAGACGATGTCGTTTCCGACTTCAGCCTCGATGCTGTTCGAGCTCCTACACTCATGCAACCTGCGAATTCACCCGATTCTTCCTCCACTGGACCGGGTGATAACCCTAATAAACCGCTATCTCATTATCGGAGTTTATCTGTTGATGCTGATTTTTTTGACGGACTGGATTTTGGTCCTGCCTCAATTGAGAAGAAGATGGTGATGGGTTCTGGACCGCGTCATGGACATAGCAATTCCATG…	MDPKFAGKPIQAQFYSGQTDLDQMQDTPTRARHRRAQSETFFRFPSFDDDMLLDDVVSDFSLDAVRAPTLMQPANSPDSSSTGPGDNPNKPLSHYRSLSVDADFFDGLDFGPASIEKKMVMGSGPRHGHSNSMDGSFDTTSFESESVLVKKAMAPDKLAELSLIDPKRAKRILANRQSAARSKERKNRYTSELERKVQTLQTEATTLSAQITVLQRDTFGLNAENKELKLRLQALEQQAHLRDALNETLREELQRLKIEAGQIPAANGNRGTRPHLPPHPQSFAQCGNHHAQQQQIPRPTTSNQTVPGQSPNSFFNFNRA*
114	Capsicum annumm	CANN_33	CA.PGAv.1.6.scaffold919.27	CabZIP33	D	chr06	233311906-233318305	ATGGCTAGTCAAGGAATAGGAGAGACTGGTTTGACAGACTCTGGACCATCATCACATTCACACCATAACCACAATATGCCATATGCTGTTTATAGGGGGATAAATCCTGCTAGCACAAGTTTCATTAATCAAGAAAGTTCTGGTTTTGATTTTGGAGAGCTAGAAGAAGCTTTTGTACTACAAGGATTTAAGATTAGTAATGATGAAGCTAAAGCATCTTTATATGCAGCAGCAGCAGCCACAGGGAAACCTGCTGCAACTCTGGAGATGTTCCCTTCTTGGCCTATGAGATTCCAACAGACCCCAAGAGAGAAGTCAAAATCAAGAGAAGAGAGTACTGATTCTGGTTCACTTTCAAGTAGAGTTCAACCCCATTTAGAGCCAGAATCACCCATCAGT…	MASQGIGETGLTDSGPSSHSHHNHNMPYAVYRGINPASTSFINQESSGFDFGELEEAFVLQGFKISNDEAKASLYAAAAATGKPAATLEMFPSWPMRFQQTPREKSKSREESTDSGSLSSRVQPHLEPESPISRKASSDHQQNQLHITHKSQEQQQQLQNMASNNPRTGGLQTELAASKSNSEKKKGAASTSERVLDPKTLRRLAQNREAAKKSRIRKKAYVQQLETSRMRLSQLEQELQRASSQGIFLGGGTTAGSNISSGAAIFDMEYSRWLDDDQRHMSELRTALQAHLSDGDLRLIVDGYIAHYDEIFCLKGVAAKSDVFHLITGMWTTPAERCFLWMGGFRPSELIKMLIGQLDPLTEQQVVGIYSLQQSSQQAEDALSQGLEQLQQSLIDTIA…
115	Capsicum annumm	CANN_34	CA.PGAv.1.6.scaffold1543.10	CabZIP38	E	chr07	229123282-229126017	ATGGCACATTTACCTCCTAGAGTGCCAATGCCACAAAATTGGCCTGATTTTTCAGCACACCAAAAAACCGAAACAATCACCACTGCCAGTCATCACCATAACCCGTCATGGGTAGATGAATTCCTCGACTTCTCCTCATCAAAACGAGGGTCTCATAGGAGATCCATAAGCGATTCCATCGCGTTCCTTGAAGCACCAATGGTCGAAGAATGCCGAATCAGGCTATCAAGTTCGGGCGCGCCTGAATTCGAGCGATTTGATGATGAACAACTTATGTCTATGTTTAACGATGATATTAATGCTGTAGAAAACAACTCTAATCCTTCGTCGCCTTCAGATCATAACAGCATTGTTCACGAAGATAAGAAAATGCAGTTGTCTACGGACGAGCAGCAGCAG…	MAHLPPRVPMPQNWPDFSAHQKTETITTASHHHNPSWVDEFLDFSSSKRGSHRRSISDSIAFLEAPMVEECRIRLSSSGAPEFERFDDEQLMSMFNDDINAVENNSNPSSPSDHNSIVHEDKKMQLSTDEQQQKQQLLKVEPEEVESSCKSDNEQTAADQHVNVDTSSEKIVDPKRIKRILANRQSAQRSRVRKLQYISELERSVTTLQAEVSVLSPRVAFLDHQRLVLNVDNSVLKQRIAALAQDKIFKDAHQEALKREIERLREIYYQQNLKKLENDDDDQPTKTQTAAAADANGSEKKEQLVN*
116	Capsicum annumm	CANN_35	CA.PGAv.1.6.scaffold162.26	CabZIP39	E	chr07	241390015-241393175	ATGGCTCAACTACCACCTAAAGTTCCCACCATGGCACATAATTGGCCATTCCAAAACATGCCCCCATTGCCTAATTCTTCGACCATCACTATCAATCACCATACTAACAATAATTCCTGGGTCGATGATTTCCTAGATTTCTCGTCGGCCCGGAGGAATTCGCACCGTAGATCAGTTAGCGACCCGATTGCATTCGTGGAGGGTCCGTTTCTCCAACAATGCCGGGTCGCTGGATCGAATATCGGGTTCGATAAATTAGACGATGAACAACTTACTACAATGTTTTCAGATGAATTAGCCAACAATGCACCCACAAGTACGAATTCATCTACACCGTCTGATCAAGTAAGTGAAAATGACGATCAGAAATCAACGGTCCTACCAACAGTTGATGTTAAT…	MAQLPPKVPTMAHNWPFQNMPPLPNSSTITINHHTNNNSWVDDFLDFSSARRNSHRRSVSDPIAFVEGPFLQQCRVAGSNIGFDKLDDEQLTTMFSDELANNAPTSTNSSTPSDQVSENDDQKSTVLPTVDVNQVVVQPKDEPGEVDDSDNNNNQLSPSAKKNAANDNSDNTNCIVDPKRIKRILANRQSAQRSRVRKLHYISELERSVTTLQTEVSALSPRVAFLDHQRLLLNVDNSALRQRIAALAQDKIFKDAHQEALKKEIERLRQIYHEQNMKKISTTATADXPPMHHRQRWHR*
117	Capsicum annumm	CANN_36	CANN_bZIP.chr08.1	X	St	chr08	71371817-71374089	ATGGCGGTGACATCAAGCTGTAAAGACAAACTGGGGATGGACAGTGGTAAATATGTGAGGTACACCCCTGAGCAAGTAGAGGCTTTGGAGAGGTTATATCATGAATGTCCAAAACCCAGTTCCCTTCGTCGTCAGCAGCTCATTCGGGAGTGTCCAATTCTGTCCAACATCGAGCCAAAACAGATCAAAGTTTGGTTCCAGAACAGAAGGTGTAGAGAGAAGCAACGTAAAGAATCATCGCGCCTTCAAGCTGTGAATAGAAAATTGACAGCAATGAATAAGCTGTTGATGGAAGAGAATGATAGGCTGCAGAAGCAAGTTTCACAGTTGGTGTATGAGAATAGCTTTTTCCGCCAACAGACTCAAACTGCAGCCCTTCCTGCTACAGACAACAATAGT…	MAVTSSCKDKLGMDSGKYVRYTPEQVEALERLYHECPKPSSLRRQQLIRECPILSNIEPKQIKVWFQNRRCREKQRKESSRLQAVNRKLTAMNKLLMEENDRLQKQVSQLVYENSFFRQQTQTAALPATDNNSCESVVTSGQHNLTPQRPPRDASPAGLLSLAEETLTEFLSKATGTAVEWVQMPGMKPGPDSIGIIAISHGCSGVASRACGLVGLEPTRVAEILKDRPSWFRDCRTVDVLNVMSTGTGGTIELLYMQLYAPTTLAPARDFWLMRYTSVMEDGSLVVRIKGYYVPNKIIK*
118	Capsicum annumm	CANN_37	CA.PGAv.1.6.scaffold986.51	CabZIP42	G	chr08	135123626-135128438	ATGGGAAACAGTGAGGATGGGAAATCCTGTAAGCTTGAGAAACCCTCTTCCCCTGCACCGGACCAGAGCAATCTCCATGTCTATCCTGATTGGGCGGCCATGCAGGCATATTATGGTCCTCGAGTAGCTGTACCTGCATATTTCAATTCAGCTGTTGCACCTGGTCATACCCCCCATCCTTATATGTGGGGGCCACAGCCTATGATACCACCTTATGGCACCCCTTATGCAGCACTATATGCTCATGGTGGGGTTTATGCGCATCCTGGAGTCCCAATTGGATCTCATCCTCCTAGTCATGGTATGGCAACATCTCCTGCTGTCAGCCAGGCCATGGATGGTGCTTCTTTGAGTTTAGATGCTTCTGCTAAGTCCTCAGGGAATTCTGAGCGAGGCTTG…	MGNSEDGKSCKLEKPSSPAPDQSNLHVYPDWAAMQAYYGPRVAVPAYFNSAVAPGHTPHPYMWGPQPMIPPYGTPYAALYAHGGVYAHPGVPIGSHPPSHGMATSPAVSQAMDGASLSLDASAKSSGNSERGLMKKLKEFEGLAMSLGNGSADNVEGGTDNGHSQSGETEGSTDGSNTNGVGVSERSKKRSCETTPDNSGDDKSHSRRCQPSGEVSNDAEKAIVAVSPGKVAEKVTGTVLSPSMTTLEMRNPASAHMKAGPTNGSPLSPALPNEAWLQNERELKREKRKQSNRESARRSRLRKQAEAEELAVRVQSLTAENMTLKSEINKLIENSEKLKLDNAALMERLKNEQLGQTEEVSLGRIDDKRLQPVGTVNLLARVNNSGSSDRTNEEGEVYE…
119	Capsicum annumm	CANN_38	CA.PGAv.1.6.scaffold134.98	CabZIP43	C	chr08	139184623-139191974	ATGGCGTCTTCATCATCATCGTCGCATCAAAACGACGTCGTCGAGATCAAGGATGAGAGTCTATCTTCTGCTGCTAATCGCAATTCCAGTACGGCATTGAATTTGAAGCCGGCGACGTCGTTTGCGAAGAATCTAAAGCCTCAGAATTCAAGTTCTACGGCACCTGATAAAGGATCAGAGACTGCTGGTGCATCACAATCAGTATCTCACATCGGCATTAAAGGATCTGGTCAGGAATTGACAAACATTCAAGATAAGGATTCTGGTGGACCGGTTGGAATACCCTCTTTGCCCCCAGTGCAGAAGAAACCTGGGGTGCAGGTGAAGTCAACAACCAGTGGTTCATCTAGAGATCAATCCGATGATGATGAAGCCGAAGGTGAAGCAGAAACAACTCAA…	MASSSSSSHQNDVVEIKDESLSSAANRNSSTALNLKPATSFAKNLKPQNSSSTAPDKGSETAGASQSVSHIGIKGSGQELTNIQDKDSGGPVGIPSLPPVQKKPGVQVKSTTSGSSRDQSDDDEAEGEAETTQGTDPADVKRVRRMLSNRESARRSRRRKQAHLTELETQVSQLRVENSSLLKRLTDISQKYNESAVDNRVLKADVETLRAKASLLKLVKMAEETVKRVTGLQPLFQAMSDVTSMAMPSFSGSPSDTSADAAVPVSNDPKHHYYQQPPNNHMPTHDPRIQNGMVDVPPIGNVQQNPVTSSVGGNKMGRTSSMQRVASLEHLQKRIRGEVSSCGTQGRGEQ*
120	Capsicum annumm	CANN_39	CA.PGAv.1.6.scaffold397.17	X	A	chr09	465175-467268	ATGGTGTCACAAGGTGAAGTTCAATCACCATTGCAACAAGACCAAAACCAGCACAAGAATCAACTGTTTTCGTCGCTTGGTAGACAAGCGTCGATCTACTCCCTCACACTCGACGAGTTCCAACACACCCTTTGTGAGAGTGGGAAGAATTTCGGGTCGATGAACATGGATGAGTTCCTTAATAGCATTTGGACTGCCGAAGAAAACCAAGCGCATGCCCATGTGCACGCGCATGCGCATGGGCACGAGCATTCTCATGCTCAGCCTCACAGCCAGAGTAGCTTGCCGAGACAGGGATCACTTTCTCTTCCTGAACCGTTGTGTCGTAAAACTGTGGATGAAGTTTGGTCAGAAATTCATAAGAACCAACAACAGCAGCAACAGAACAACGGAGGCAGT…	MVSQGEVQSPLQQDQNQHKNQLFSSLGRQASIYSLTLDEFQHTLCESGKNFGSMNMDEFLNSIWTAEENQAHAHVHAHAHGHEHSHAQPHSQSSLPRQGSLSLPEPLCRKTVDEVWSEIHKNQQQQQQNNGGSVPNTSNSSSTQRQATFGEMTLEDFLVKAGVVREQGNAAAPVPTQQQSYTMYQNSTAPTMGAMARPVIGLSGVTAGVGVGVGIPGYPQLPQSGVVEAPLYPISMKRGSGFPQQPTPVYGGRIGNGAXXRKRVLDGPVEKVVERRQRRMIKNRESAARSRARKQAYTVELEAELNQLKEENAHLKQALADLERKRKQQYFDEVKMKAQTKAQKANDKLRGMRRSFSCP*
121	Capsicum annumm	CANN_40	CA.PGAv.1.6.scaffold397.46	X	J	chr09	892952-896163	ATGTACGGTGACCAGACCACTAACTCTAAAGAAGTAGAGAGGCTGTTTTCGATAGACCCCCGGCTCAAATCGCTGGAATATCTTCTGCCTTATATGATTGAGCAAGCAATCGAGGGACAGTCCGAGCAGGAATCTGAACCCAAAACAAACCCTCGACATGCTCTTAACTGTCCACCAGCTACCAGCAGAAGATCGAGGCAGAATTTGACCGAGGAGGAGAAGGAACAACGAAGACTCAGTCGTGTGTTGGCAAACAGAGAGTCTGCTAGACAGACGATTCGTCGGAGACAGGCCATGTATGAAGAATTGACAAGAAAAGCAGCTGATCTTGCATCGGAGAACGAAAGTTTAAAGAAGAAAAAGGAGATGGCGGCTAAGGAGTACGATTCTTTGAAGAAC…	MYGDQTTNSKEVERLFSIDPRLKSLEYLLPYMIEQAIEGQSEQESEPKTNPRHALNCPPATSRRSRQNLTEEEKEQRRLSRVLANRESARQTIRRRQAMYEELTRKAADLASENESLKKKKEMAAKEYDSLKNQNASLRLQIAKAEKAEGEETDGASTSKPVHISTTRTGPAPPPAPYPIPTMAPMPPLFWPSIVQPFNSFVLQCNTANVSGITSVLSSSTAGESNSITNPGNPFYVLPVPCLIPFNPQNSPVFPWSATLDKHPETSGVHHCDTSYPNMENNPAATAQERETDAPDSVQATQNRQPGISRQSDTRHRQHNTPDINATVSFTAGQVGDTSEKTTCQESITCSSDKSADAVAAAAEARRRRKELLHLKGHHSDTPNH*
122	Capsicum annumm	CANN_41	CA.PGAv.1.6.scaffold318.5	CabZIP51	E	chr09	240111675-240125973	ATGAGCGACTCCATTGCATTCTTGGAGTCGCCCATGGTGGAAGAATGTCGTAGGCTATCCAGTACTACTCCAGGGTCCAGTGGGACAACTAACGGTCACGAGGAATTCGAGAGGTTTGATGACGAGCAACAAATCATGTCCATGTTCAACGACGACATAAACGACATGTCCTGCTCGAATCCATCATCACCTTCAGATTATATCAACGTTAATGAAGATAAAAAGATCAACGGCCCTGATCAGTTGATGCAGCATCTTAAGAGTGATCAAAATGAGGAAATTCAAAGTTCATGCAAGACTAATGAGGAATTAGCACCAGCTAATCAGAATGCAAGTACTAATAATGAATGTTCTTCTGAAAGGGTGGTTGATCCAAAGAGAATTAAAAGGATATTGGCA…	MSDSIAFLESPMVEECRRLSSTTPGSSGTTNGHEEFERFDDEQQIMSMFNDDINDMSCSNPSSPSDYINVNEDKKINGPDQLMQHLKSDQNEEIQSSCKTNEELAPANQNASTNNECSSERVVDPKRIKRILANRQSAQRSRVRKLQYVSELERSVTTLQAEVSVLSPRVAFLDHQRLLLNVDNSALRQKIAALAQDKLFKDAHQEALKVEIERLRQIYYQQQMDNTTAPVADSTTAPPEIKMVNTRSNKTQPTTPALIALARASHKEKRMRERKRYGEEVDVFSLDLPGMPPDRNIDSCIDLEPDTQPISIPRYQMDPAELREITTQL*
123	Capsicum annumm	CANN_42	CANN_bZIP.chr10.1	X	I	chr10	45549569-45554148	ATGTTGTCCCTCATGCATGAAGTAAAGGGAAGGATTTTGGCGAATCGGCAATCTGCTTCTCGCTCGAAAGAGAGGAAAGCCCGTTACATAACTGAACTTGAGAGAAAGGTTCAGACCCTTCAAACAGAAGCAACCACTCTTTCTGCTCAATTAACCCTTTTCCAGCGGGATACGACCCAGTTTACTAATGAGAATACAGAGCTTAAGCTACGTCTGCAAGCTATGGCACAAGAAGCTCAGTGCCAAGGACCTTATTCGGAAAATGCTAACACTAGAGCCAAAGAAGAGAATTACTTCAGTGCAAGTTCTTGGAAATTTTGGGCTAGGCTCCACATCCATCACTACAATGTGGATAGACCCCGCTTTTGA	MLSLMHEVKGRILANRQSASRSKERKARYITELERKVQTLQTEATTLSAQLTLFQRDTTQFTNENTELKLRLQAMAQEAQCQGPYSENANTRAKEENYFSASSWKFWARLHIHHYNVDRPRF*
124	Capsicum annumm	CANN_43	CA.PGAv.1.6.scaffold128.130	CabZIP6	A	chr10	227793271-227800338	ATGGGATCTCAAGGGGGTGGTGGGGTTAATAGTGTTGGTGCAACACAAGCTCAAGACCCGAAAATGAATGCTTTGGCTAGGCAAGGATCATTATATAGTCTCACTCTTGATGAGGTTCAGAATCAATTAGGGGATTTGGGGAAGCCGTTGAGTAGTATGAATCTTGATGAGCTTCTTAAGACTGTATGGACTGCTGAGGCTAGTCAAGGAATGGAGGGAACGGATTACGGGGCGTTGCAGCATGGTCAGGTTGCTTCGGGGAGTTCTTTGCATCGACAATCGAGCATTACATTGACTAGTGATTTGAGCAAGAAGACTGTTGATCAGGTGTGGCAGGATATTCAACAGGGGCATAAAAGGGATAATATCGATAGGAAAGCTCAGGAGAGGAAGCCTACT…	MGSQGGGGVNSVGATQAQDPKMNALARQGSLYSLTLDEVQNQLGDLGKPLSSMNLDELLKTVWTAEASQGMEGTDYGALQHGQVASGSSLHRQSSITLTSDLSKKTVDQVWQDIQQGHKRDNIDRKAQERKPTLGEITLEDFLVKAGVVAESNPGKKSLGSVLGVDSMALPQQSVQQQAQWSQYQIQAMHQIPPQQQPQQQNMLPVFMPSHPVQQPLTIVPNPTIDAAYPESQMTMSPTELLGTLSDTQTLGRKRVAPEDVVEKTVERRQKRMIKNRESAARSRARKQAYTHELENKVSRLEEENERLKRQKEIEKVLPSVPPPEPKYQLRRTSSAPF*
125	Capsicum annumm	CANN_44	CA.PGAv.1.6.scaffold128.71	CabZIP53	D	chr10	229157942-229167116	ATGCCAAGTTTCATTTCTCAGATACCAGTTTCAAATCACATGGGCACCGAAGGGAACAATACAAATACTTCTCGAATGTCTGAATTTGGGGTGCTTGAGCAATATCTTGGATTCCGTATTGGAGATGGTTCTAATGCTAATCGAAGTCCCCTATTTAATTCAACATCTGCAACTAATCCAGCAGTGGGCTTTGACGTCTCTGGAACCATCAATAGGAATTTAGCCCCTTCAAATACAAGTTTGTCTGCTGCTGCTCCGGGATCTCAGATATTACAATTGCAATCAAGTGTAGTTCCTGTATCCTCTAATCCTGAGAATTGGGGCGAGTCCAACTTGGCCGATTCTGGTTCTCGCACTGATACTTCAACTGACATGGATGGAGATGATAGAAATCAACGG…	MPSFISQIPVSNHMGTEGNNTNTSRMSEFGVLEQYLGFRIGDGSNANRSPLFNSTSATNPAVGFDVSGTINRNLAPSNTSLSAAAPGSQILQLQSSVVPVSSNPENWGESNLADSGSRTDTSTDMDGDDRNQRIETGQSRTIAASDSSDKSKEKVLDQKTLRRLAQNREAARKSRLRKKAYVQQLENSRLKLSQLEQDLQRARQQGKYISNMGDQSNGVGASGTLAFDAEYSRWLEEHNKHINELRNAVNSHASDPELRSIVNNVTAHFDEVFRVKGNAAKADVFHVLSGMWKTPAERCFMWIGGFRPSELLKLLVTQLEPLTEQQLAGIYNLQQSSHQAEDALSQGMEQLQQSLAETLANGSPATEGSSGDVANYMGQMAMAMGKLGTLDGFLRQADS…
126	Capsicum annumm	CANN_45	CA.PGAv.1.6.scaffold128.31	CabZIP54	D	chr10	229863703-229871795	ATGGATTCCACTAACAATAATATTTCTTTCATCAACCACCATCAGTTTTTTCATAATATTCCGCAGCAGCAGCAGCAACAACAACAAATGGAAAATAATAATAATCATCATCATCAGATATCTTTTGGATTATTTCAACAGTCACCTTCTTCATCATCTGCTAATCCTGATGAAAACTTCATAAGCAAAGAGAATGGTGGAGCTTATGATTTAGGTGAACTAGATCAAGCACTTTTTCTTTATCTTGATGGACAAGATCATCCTTCTTCATCAATCCAAGATCAAAGACAGAATAATTATGGGATGAGGCCACCAACTCTCAACATTTTTCCATCACAGCCAATGCATATCGAGCCATCTTCAACTAAGGAAACTATTGGATTAGTTTCTCAATCTACA…	MDSTNNNISFINHHQFFHNIPQQQQQQQQMENNNNHHHQISFGLFQQSPSSSSANPDENFISKENGGAYDLGELDQALFLYLDGQDHPSSSIQDQRQNNYGMRPPTLNIFPSQPMHIEPSSTKETIGLVSQSTTSGSKKTSQPSTDKTEPPPKVPKREGSGKSPTSSQEQDAPKTPDPKTLRRLAQNREAARKSRLRKKAYVQQLETSRIRLAQLEHEIQRARSQGFHVGGNVLHGGDQGFQINRTNISSDAAAFNLEYARWLEEHHKLLCELRNAIFEEQLQEDELRIYVENCVAHYDNMMNFKGILAKSDVFHLVSGLWKSPAERCFLWIGDFRPSELLKIIVNQIDALTENQVLGLCALQQSTQEAEDVLSQGLEALNQSVSDTIIASDALIMGNN…
127	Capsicum annumm	CANN_46	CA.PGAv.1.6.scaffold1161.19	X	D	chr10	232865612-232873248	ATGGGGCTTCAAAGTCATGATAATCAAATTTCTTTTGGAAGTCATGATCATCACCAGTACCATCAACAACCTCAGCAGCATCAGCACCAGCACCAACACCAACACCTATTATTCCATGATCAGCAGAATAACGCTGATCAGATTACTTTTGGAATGTTACATCAGTCATCTTCTGTCATACCAGAAAACTTCGTAAGCAAAGAGAATAGCAGTACTGGAGGTTATGATATAGGTGAACTAGATGATCAAGCTCTTTTCCTTTATCTTGATGCTCAAGATACTTCTTCAAATCATGACCAAATACAAAATAATTCAGAGATGATGAGACCACCAACTCTCAATATTTTTCCATCACAACCTATGCATGTTGAGCCATCATTCACAAAGGGAAATGCTGGA…	MGLQSHDNQISFGSHDHHQYHQQPQQHQHQHQHQHLLFHDQQNNADQITFGMLHQSSSVIPENFVSKENSSTGGYDIGELDDQALFLYLDAQDTSSNHDQIQNNSEMMRPPTLNIFPSQPMHVEPSFTKGNAGFISSGSEKSSEPSMMELSKTKNNALSTSSGPEPKVPKTLRRLAQNREAARKSRIRKKAYIQQLESSRIRLAQLEQELQRARSQGFHFAGSALLGGEQGLSGNIGNISSDAAVFDMEYSRWLEEHHRLMCELRNALTEHFPENELRMYVDNCVSHYDEIMNLKAMLLKSDVFHLVSGTWKTPAERCFIWMGDFRPSEIIKIILSQIEPLTEQQFVGICGLQQSTQEAEEALSQGLESLNQSVSDTIVSDALLANSPQNMANYMGQMA…
128	Capsicum annumm	CANN_47	CA.PGAv.1.6.scaffold656.41	X	D	chr11	3694691-3700574	ATGCAAGCTTACAAAGCAGCAGTAGTACCAAATGTTACACTTAATAATAATAATAGTAGTGGTAACGCTAATACTATGTATTGCCATTCAACTTATTATCTCAGAGGTGATGAAGCTAATAGAAATGCGGCGCGCTTTGCGGATATTGGAGAACTTGAGCAATCTGCAGGATTCACTCAAGAAGATGCTGTTGATTTAAGCAGAAGTTCTGTGTATGGTGAAATGAGGCCAAGCAATGTTGGTGTAGTTTCTTGCAACAATAATAAATTACATTTCGGCGAACTTAATACGAGTATTGGTTCAACAGAAATTGGTTCATCAGAGACAGGAGTGGATACAGGGAGGTTCATGTTGCAGAAGGCACAAACAGCAATGTTGGGGGCTGGTTTGGTAGGTGGT…	MQAYKAAVVPNVTLNNNNSSGNANTMYCHSTYYLRGDEANRNAARFADIGELEQSAGFTQEDAVDLSRSSVYGEMRPSNVGVVSCNNNKLHFGELNTSIGSTEIGSSETGVDTGRFMLQKAQTAMLGAGLVGGGGGSVALGNVQHFENWGDSGIADHSQQTDTSTDVDTDERNHQGQGIQHGALIAVESMDQSKIKLGDQKTLRRLAQNREAARKSRLRKKAYVQQLENSRLRLSQLEQELKRARQQGIFIANGYTGDQSLSAGGNGALAFDMDYARWLEEHQRLISDLRSAVNSHSGDNELRHLVDGVMSHYDEKFKLKSVAAKSDVFHMLSGMWKTPAERCFMWLGGFRSSELLKILGNHLEPLTEQQLMGICNLQQSSQQAEDALSQGMEALQQSL…
129	Capsicum annumm	CANN_48	CA.PGAv.1.6.scaffold184.9	CabZIP3	S	chr11	6058161-6058817	ATGCTCTCCTACAATCTCACCATTATCTGCAAATTGAAGTTTCTTCATATAAATTTAACTATGATTCCATCAGAGGCTACTGCAACTCACTACTTTGCGTCCGAAAATCCTTCACCTTTGCCTCTTGACTTCAACTTCATGCACAACAGTTTACCATCAATCCAGTTTAGCAGATACTTAACAAATGTACCAAATTATCCAACTTCACTTCATGTTCATGACTTTAACAATCTGCCACAATCTTGCATCAGTAGTAACTCTACCTCTGATGAAGCGGACGAGCAGCAACTTAGGATCAACGATGAGAGAAAGCAAAGGAGGATGATATCTAACCGAGAATCAGCAAGAAGATCCAGGATGAGGAAACAAAGACATCTTGATGAGTTATGGTCACAAGTT…	MLSYNLTIICKLKFLHINLTMIPSEATATHYFASENPSPLPLDFNFMHNSLPSIQFSRYLTNVPNYPTSLHVHDFNNLPQSCISSNSTSDEADEQQLRINDERKQRRMISNRESARRSRMRKQRHLDELWSQVLRLRTENNNLIDKLNHVSECHEKVLQENVQLKEEASDLRQMLTDLQFNSPFPDLCDLDDDVPCTTAHLKAESSNLSITYSTNLLH*
130	Capsicum annumm	CANN_49	CA.PGAv.1.6.scaffold16.11	CabZIP1	A	chr11	149362159-149364236	ATGGGATCTTACCTGAACTTCAAGAACTTCGCTGACGCATCACAACCAGAGAGCAGTGGGACTAATAATTTTTCATTGGCCAGACAATCTACCATATACTCCTTTACGTTTGATGAGCTGCAAAGTACATGTGGACTTGGAAAAGATTTTGGATCGATGAATATGGATGACTTCTTAAAGAATATTGAAGGGGAAAATTTGCAGAGACAGGGTTCTTTGACACTGCCTAGGACACTTAGTCAGAAAACTATAGATGAAGTATGGAAAGACTTTCAGAAAGAGAGTGTTAATGCTAATGATGTAAGTGAGACTGGAGGATCAAACTTTGGGCAGAGGGAATCTACCTTGGGAGAAATGACATTAGAAGAGTTTTTGGTTAGAGCAGGGGCGGTGAGAGAA…	MGSYLNFKNFADASQPESSGTNNFSLARQSTIYSFTFDELQSTCGLGKDFGSMNMDDFLKNIEGENLQRQGSLTLPRTLSQKTIDEVWKDFQKESVNANDVSETGGSNFGQRESTLGEMTLEEFLVRAGAVREDMQPTGYSNDVTLTTTSGFIQPSSNVTIKFLQATQNPGHQIAGTNIFNVVSTTSLPQQPLFPKQTTVEFASPMQLGTRAPMPNPSANTNSIMQGGVMSMPVKGVSPGNLDTSSLSLSPYACGEGGRGRRSCTSIEKVVERRRKRMIKNRESAARSRDRKQAYTLELEAEVAKLKEIKQQLQKNQAEFIEKQKNQLLEKMNMPWENKLICLRRTVTGPW*
131	Capsicum annumm	CANN_50	CA.PGAv.1.6.scaffold468.4	X	D	chr11	182274999-182289741	ATGGCTGATATCAGTCCTAGTACGTCGACAGATGCCGATACTGAAGATAAGAACAGGTTCCTAAATCAACAACTGGCCATAGCTTCTGATGGAAGTGACAGACCGAAAGATCAAAAGACACTCCGTAGACTTGCTCAAAATCGCGAAGCCGCTCGAAAAAGCCGTCTAAGGAAAAAGGCATATGTTCAACAGTTAGAGAGCAGCAGGATGAAGTTGACACAACTAGAACAGGAGCTTCAACGGGCCCGGCAACAGGGAATATTTATTTCAGGTTCAGGAGATCAATCACAGTCGATGAGTGGAAATGGAGCTTTGGCATTTGATGTAGAATATGCCCGATGGTTGGAAGAGCAGAATCGACGAATTAATGAATTACGGGGAGCTGTTAATTCTCATGCT…	MADISPSTSTDADTEDKNRFLNQQLAIASDGSDRPKDQKTLRRLAQNREAARKSRLRKKAYVQQLESSRMKLTQLEQELQRARQQGIFISGSGDQSQSMSGNGALAFDVEYARWLEEQNRRINELRGAVNSHAGDAELRIIVDGISAHYDDIFRIKGDAAKADVFHILSGMWKTPAERCFLWLGGFRSSELLKLLINQLEPLTEQQLLAINNLQQSSQQAEDALSQGMEALQQSLAETLAGSLGPSGSSGNVANYMGQMAMAMGKLGTLEGFIRQADNLRQQTLQQMHRILTTRQSARALLAISDYFSRLRALSSLWLARPRE*
132	Capsicum annumm	CANN_51	CA.PGAv.1.6.scaffold631.32	X	St	chr11	262887580-262893124	ATGGCTATGGTGGCACAGCAGCATAGGGAGAGTAGTAGTGGTAGTATTACAAAACATCTTGATAGTAGTGGAAAGTATGTTAGATACACGGCTGAGCAAGTTGAAGCTTTGGAGAGGGTTTATGCTGAGTGTCCTAAGCCTAGTTCGTTGCGCCGGCAGCAATTGATCCGTGAATGTCCTATTCTGTCGAATATCGAGCCTAAGCAGATCAAAGTTTGGTTTCAGAACAGAAGGTGTCGAGAGAAGCAAAGGAAAGAATCTTCTCGACTACAGACCGTAAATAGAAAATTGTCTGCCATGAATAAACTGTTGATGGAGGAGAATGACCGCTTGCAGAAACAAGTGTCGCAGCTTGTATGTGAAAATGGCTATATGCGGCAACAATTGCAAAATGCATCG…	MAMVAQQHRESSSGSITKHLDSSGKYVRYTAEQVEALERVYAECPKPSSLRRQQLIRECPILSNIEPKQIKVWFQNRRCREKQRKESSRLQTVNRKLSAMNKLLMEENDRLQKQVSQLVCENGYMRQQLQNASAATTDVSCESVVTTPQHSLRDASNPAGLLSIAEETLAEFLSKATGTAVDWVPMPGMKPGPDSVGIFAISHSCSGVAARACGLVSLEPTKIAEILKDRPSWFRDCRNVEVFTMFSAGNGGTIELLYTQIYAPTTLAPARDFWTLRYTTTLDTGSLVVCERSLSGTGAGPNAAAASQFVRAQMLPSGYLIRPCDGGGSIIHIVDHLNLEAWSAPEILRPLYESSKVVAQKMTIAALRYARQLAQETSGEVVYGLGRQPAVLRTFSQRL…
133	Capsicum annumm	CANN_52	CA.PGAv.1.6.scaffold143.42	CabZIP60	E	chr12	30519161-30523086	ATGTCAAGGCAAGCTCATCTTCCACCTCGCTGTCCGTTTCAGAAGAAACCGTTAACTTGCCCGGTTCAAGGTCCTTTTAGCCCACCATCACACCAACAGAACCCGTTGCCTCCTCGACATCAAAAATCTGTTTCCGAAAGCTCCATTCTAGAAGAGCAGCCTGTATGGCTTGATGAGCTTCTGAGCGATTCGGGCTCAAATTCTAGTGGCATAATGCATAGGAGATCAGCTAGTGATTCTTTGACACTTTTGGATGGTCTTGGTTCATTGGAAGGCTTTGATAAGTTTGACGAAACTGAATCCAATGCTTCTTGTGAATCGGATAGTAGTTCAAAGACTAATTGTATCTATGGTCCTAATTCACCCCGTGGAAAGAGCAACATAACCTTTGCAGACAAT…	MSRQAHLPPRCPFQKKPLTCPVQGPFSPPSHQQNPLPPRHQKSVSESSILEEQPVWLDELLSDSGSNSSGIMHRRSASDSLTLLDGLGSLEGFDKFDETESNASCESDSSSKTNCIYGPNSPRGKSNITFADNAIVSALSEYVSPNPLQYLDRCISVSGAAQSESVGNASGAADDVSAEAKPMKRHPGQRSRVRKLQYIAELERTVNTYEAIESDLTAKVASLLQRRVTLSMENRELKQQMLRLQQEKVIVDAQYRSLRKELERLKQLARSRNGKLSTNFRVNSAAEMTGSDAAWQMLDFGKLDLN*
134	Capsicum annumm	CANN_53	CA.PGAv.1.6.scaffold18.23	CabZIP7	D	chr12	137067962-137072104	ATGAATTCTTCAACCTATACTCAATTTGTTGCCTCAAAAAGGATGGGTATATGTGACCCGATCCAGCAGATTGGCATGTGGGGAGATTTCAAAGGTAGCAGTTTCCCAGACACCTTGATTCTTGAAGTCGAGAATTGCCTAGAGAGCGAGATGCCTATTATGGAGAAAAGATTAGATAATGAGACAGAGGAACCTTCACATGTAACAGTTGGAAGGTCTAATATATATGAACCAGAAACAAGTAAACGCATTGACAAGATGAATAGACGCCTCGCACAAAACCGTGAGGCTGCTCGTAAAAGTCGTTTACGGAAGAAGGCCTATGTCCAGCAGTTGGAAAATAGTAAACTGAAGCTGCTTCAGTTGGAACAAGAACTAGAACGTGCTAGACAACAGGGT…	MNSSTYTQFVASKRMGICDPIQQIGMWGDFKGSSFPDTLILEVENCLESEMPIMEKRLDNETEEPSHVTVGRSNIYEPETSKRIDKMNRRLAQNREAARKSRLRKKAYVQQLENSKLKLLQLEQELERARQQGLYVGGGLDTSQIGCSGTANSEIATFEMEYGHWVEEQDRQTDDLKSALNSQIGEIEMRILVEGCLNHYFDLFRLKATAANTDVLYLMSGTWKASAERFFLWIGGFRPSELLKVLTPHVEPLTEQQVQEVCNLTQSCQQAEDALSQGLVKLHQILAEAVAAGTLGDGIILPQMTATIEKLEALVRFVNQADHLRQETLLQMSCILSVQQSAQGLLALGDYFKRLRSLSSLWSSRTSEPA*
135	Capsicum annumm	CANN_54	CANN_bZIP.chr12.1	X	A	chr12	151784618-151784824	ATGGAAACACCACAACCATCACCACCCCACATAGGATATCAAAATAGGGTTGTAGTGGCGACTATTACAGAGAGTGGAAGTGGCAGTGTAAGAGATAAGAGAAGGTCAACTGTGGAGAAATTGCCGGCTAATAATGCTACACAGCAGAAACAACGACGTATGATCAAGAACAGAGAGTCTTCTGCCAGTTCTAGAGAGCGAAAATAG	METPQPSPPHIGYQNRVVVATITESGSGSVRDKRRSTVEKLPANNATQQKQRRMIKNRESSASSRERK*
136	Capsicum annumm	CANN_55	CA.PGAv.1.6.scaffold446.2	X	St	chr12	164844039-164850937	ATGTCCTGCAAAGATGGTAGATCAGTTGAAGATAACGGCAAGTATGTCCGTTATACACCTGAGCAGGTTGAAGCTCTTGAAAGGCTATATCATGAATGTCCAAAACCCAGTTCAATGCGTCGTCAGCAGCTTATTCGTGAATGTCCTATTCTCTCCCACATTGAGCCTAGGCAAATCAAAGTTTGGTTTCAAAATAGAAGATGCCGGGAAAAACAGAGGAAAGAGTCATCAAGGCTTCAGGGTGTGAATAGAAAGCTGTCAGCAATGAACAAGCTATTAGTGGAAGAGAATGATAGATTGCAGAAGCAAGTTACTCAACTGGTATATGAAAATGGATACTTCCTCAAGCAAACTCAAACTACAAAGCTTGCTTCAAAAGACTCCAGTTGTGAATCAGTG…	MSCKDGRSVEDNGKYVRYTPEQVEALERLYHECPKPSSMRRQQLIRECPILSHIEPRQIKVWFQNRRCREKQRKESSRLQGVNRKLSAMNKLLVEENDRLQKQVTQLVYENGYFLKQTQTTKLASKDSSCESVVTSGQHHLTPQHPPRDASPAGLLSIAEETLTEFLSKATGTAVEWVQMPGMKPGPDSIGIIAISHGCTGMAARACGLVGLDPTRVAEILKDRPSWYRDCRAVEVLNMLPTANGGTIELLYMQLYAPTTLAPPRDFWLLRYTTVTDDGSFVVCERSLRNTQNGPSMPPVQNFVRAEILPSGYLIRPCEGSGSIVRIVDHMNLEAWSVPEVLRPLYESSAVLAQKTTMAALRQLRQLTLEFLQPNVTNWGRRPAALRALSKRLSRGFNE…
137	Capsicum annumm	CANN_56	CA.PGAv.1.6.scaffold47.16	CabZIP59	D	chr12	177266078-177268968	ATGAACATGAGTTCTCCATCAACTCAATTTGCCCCCACAAGAAGGATGGGCATATTTGAACCTTTCCACCATATGAGTGTGTGGGAAGACACATTTAGAGGTGACATTATGCCCAGCACTGCTGCTTGTATGGTCACACCGACAAATGACAGGGCAGATGACAAGTCTGGATATACTTCTAGTGAACAACTAATACCATCTGGATCTGAGGATAATCAGGCAGGAAAGAGTATTTCAGACAAGATACAACGGCGTCTTGCACAGAATCGTGAAGCTGCCCGAAAAAGCCGTATGAGGAAAAAGGCTTATGTTCAGCAGCTTGAAAAAAGCAATTTAAAGTTAGCACAACTTGAAATGGAACTTGAGAGAGCTCGACAGCAGGGACTGTACATTTTAGGT…	MNMSSPSTQFAPTRRMGIFEPFHHMSVWEDTFRGDIMPSTAACMVTPTNDRADDKSGYTSSEQLIPSGSEDNQAGKSISDKIQRRLAQNREAARKSRMRKKAYVQQLEKSNLKLAQLEMELERARQQGLYILGSNGNMGLSSTINPGIAAFEMEYSLWVEEQQKKNVELRNILQSHVTEMELQLLVETVLNHYYNLFRMKADAAKADVFYLMSGMWRSSVERFFLWIGGFKPSELINIVMPQLEPLSDQQIVKICNLRHCCQQAEDALTQGMDKLQQTLAQGILTMTTGMGSYSSQMVSSMEKLEALESFVNQADHLRQQTLQQMSLILTTRQSARGLLAFGEYLQRLRALSSLWAARPREPT*
138	Capsicum annumm	CANN_57	CA.PGAv.1.6.scaffold588.80	CabZIP50	F	PGAv.1.6.scaffold588	1204047-1204859	ATGGCTGACGGGGAGCTGGAAATTTCTAACCAAGAAATGTTATCAAGTTCGAATTTTGGTGAATTTAGTAGCTCCATGGACAGCTTTTTCAATGAGATACTCAAGGATGCGCATGCTTGTACTCATGCTCACACTTGTAACCCGCCCGGTCCTGATAACTCCCATACCCATACTTGCTACCATGTTCACACCAAAATAGTGCCTACCTCGGAAGACGATAAGAACCCCAGCGATGATACTGCAGAGTCTGCGGAAAATAAAGGGAAGAAACGCCCGGCGGGTAATAAGGAAGCTGTTCGTAAGTATCGTGAGAAAAAGAAGGCTCGGGCTGCTTCATTAGAGGATGAAGTTGTGAGATTGAGAGCTATAAATCAACAGCTGTTGAAGAGGCTGCAGGGT…	MADGELEISNQEMLSSSNFGEFSSSMDSFFNEILKDAHACTHAHTCNPPGPDNSHTHTCYHVHTKIVPTSEDDKNPSDDTAESAENKGKKRPAGNKEAVRKYREKKKARAASLEDEVVRLRAINQQLLKRLQGQAVLEAEVARLKCLLVDIRGRIEGEIGSFPYQKPMKNGNAYQQIVNPSFPGAYVVNSCNLQCDDQLYCLHPGAEGKSSDGTVVNGQGFNNCEFETLQCFGNQTSELEEVPGCTVGSSTPTANTGRSKRRGELMFLFC*
139	Capsicum annumm	CANN_58	CA.PGAv.1.6.scaffold675.1	CabZIP28	A	PGAv.1.6.scaffold675	23394-33232	ATGAATGTATCCTCAAAACGACATTTAGAAAAAAAAATAAAAAAAATCTTGCCTCCTCTTTCCAATTTAGGCAAGGGAACCCATCACCCTCGCTTCTCCTCTCTATATCCCCTTGCTAATTCTGGAACTGCACCCTTTTGTTTTTCTCCCCAATTCCCCAAAAAAACCCTTTTCACAAACACCAAATTACCCGAAACCCTAGGCATTCATTTGCATTACACAACACAATCATCATTTGAGGCTTTGATCGAAGCAGAAGAATTTTGCCATTTTGCCCCCGCCGCCGGAAAAATGGCGTCAATGAAGCTGATGTCATCATCGGCGTCGCGGAATTCCGATCGAAGGAAATCGTCTGCTGCGTCGTCGTCTTCGTCGTCGACAATTCCGAATGATATGCAG…	MNVSSKRHLEKKIKKILPPLSNLGKGTHHPRFSSLYPLANSGTAPFCFSPQFPKKTLFTNTKLPETLGIHLHYTTQSSFEALIEAEEFCHFAPAAGKMASMKLMSSSASRNSDRRKSSAASSSSSSTIPNDMQNQQYSNNGSNNSSNLEATSMTVDGIFPNAYVESQGITLLDAAGAITAISDSETVPVTAPVRRTVDDVWREIVEGKREQRRAAIAGCKEEAVDEIMTLEDFLVKAGAVEEESVAMQGPVQGEVKVELGTERLSGGIFAYDAPYMATPQQSVQGFGNGMEVIGGGRGKRKAILEPLDKAALQRQRRMIKNRESAARSRERKQAYQVELESIAIRLEEENEQLLKEKEERTRAHYKQLIEKVIPIVEKRKPPRVLRRVCSMQW*
140	Capsicum annumm	CANN_59	CA.PGAv.1.6.scaffold959.45	CabZIP57	A	PGAv.1.6.scaffold959	727083-729313	ATGGTGGTGACTTGTGGGATGGGATCTCAGGAGGGAGGTGGCGGTGTAATAGAAGCAAATCCAAATGCTTTGGATAGGCAAGGATCACTCTACAGCCTCACTCTTGACGAAGTTCGGAATCAATTGGGGAGTAGTGGAAAACCACTCAATAGCATGAATCTTGATGAGTTTGTTAAAACTGTACGGACTATTGAGGCTAATCAAGAAGTGGGCGGAAATGGTTACGGGGCAATGCAGCACGGGGCTTCTGTGCATCATCAATCGAGCCTAACAATGACCAGGGATCTAAGCAAGAAGACTGTCGATGAGGTGTGGCAAGATATTCAGCAGGGGGGGAAAAGAGAGAGCGTTGAGAAGAGAAGCCCGGAGATGCAACTTACTTTAGGTGAGATAACTCTG…	MVVTCGMGSQEGGGGVIEANPNALDRQGSLYSLTLDEVRNQLGSSGKPLNSMNLDEFVKTVRTIEANQEVGGNGYGAMQHGASVHHQSSLTMTRDLSKKTVDEVWQDIQQGGKRESVEKRSPEMQLTLGEITLEDFLVKAGVIAESNQGKRNSGLVSGVNSMALGQQAQWPHYQIPAMQQVPEHHHHQQQQQNRQLVFMPGHPIQQPLPVVANPIMDATNPETKVTMSPAHAVGTLSDTHTMGRKRAAPGDVIENSAERRQKRMIKNRESAARSRARKQAYTHELENKVSRLEEENERLKRQKEIENILPSVPPPEPKYQLRRTSSGPI*
141	Capsicum annumm	CANN_60	CA.PGAv.1.6.scaffold960.76	CabZIP56	B	PGAv.1.6.scaffold960	765155-767857	ATGGGCGATTCAGTTGTGGCCGATCCACCACCTTTGACGTCGGGGGAAATGGCGGCGAATCCTGCCGGAGAATTTGACGGTCTTCCAGTTCCACCTTTTGATGGTAATTTTTTCGCTCAACAAATGACGTCAGCAGATCACAGTGATTTTCCGATTGAATTCCAGCTTGATGATATCGATTTCGATCTGTCGTTCGATGATTTTTTTCAGAATCCTTGTGATGGTAATTTGCCTGATGTTCTCGGGTCGGATCCGGGTCTGATTGACCCGAATAGCTTCGGTAAAATCGGGGATTTTGATTCCTCCTTCGATGATTGTCTTAAGGAACCTCCGGGTTCGAATTTGGGGCACATGGACCCTTATTGCTTTGGCCAAATTGGGGATTTTGACAATATTGAT…	MGDSVVADPPPLTSGEMAANPAGEFDGLPVPPFDGNFFAQQMTSADHSDFPIEFQLDDIDFDLSFDDFFQNPCDGNLPDVLGSDPGLIDPNSFGKIGDFDSSFDDCLKEPPGSNLGHMDPYCFGQIGDFDNIDESSGNVKLTSTDTSSPELYQSSSSSGVLNEQGSTDVFGYLNVSSPVSNGSNNKDLSDVKVKALNCHSPESQGSGHCGSNLSEGLNYQSDSNKSVHSSPNLGNNSMKGVVVEQKFKVERVNAGISKCSSILKRKKCSEDSNNINKIQKSNTFSLSDNVNSEEDEKRLARLIRNRESAHLSRQRKKHYVEELEDKIRMMHSTIQDLNAKVSYVMAENVTLRTQLGGAGVPPPVPPPPGMYPHPPVMYPWMGYTPPYMMKPQGSQVPLV…
142	Capsicum annumm	CANN_61	CA.PGAv.1.6.scaffold1030.9	CabZIP25	A	PGAv.1.6.scaffold1030	194757-198621	ATGGGGAGTAATTATAATTTCAAGAACTTTGGAAATGAGCCACCAGGGGAGGGTGGAAGTGGTGGTTGTGGAAAGCAGCCGGGGAACTTTCAGTTGCCGCGGCAGTCATCTATCTATTCGTTGACGTTTGACGAGTTTTTGAGCTCAACAGGAGGAATTGGAAAGGATTTTGGGTCAATGAACATGGATGAGTTGCTGAAGAATATATGGAGTGCTGAGGAGAGTCAAACTATGGGAGGTACTGGGATTGGTGGGCAAGAGGTTGGTGTTTCAGGTGGGCATTTGCAGAGGCAAGGCTCTTTGACTTTACCTAGGACACTGAGTCAGAAGACTGTTGATGAAGTTTGGAGGGATATGTCAAAGGAGCATGGTGGTGGTGGTGGTGGTGGAAAGGATGGA…	MGSNYNFKNFGNEPPGEGGSGGCGKQPGNFQLPRQSSIYSLTFDEFLSSTGGIGKDFGSMNMDELLKNIWSAEESQTMGGTGIGGQEVGVSGGHLQRQGSLTLPRTLSQKTVDEVWRDMSKEHGGGGGGGKDGNSIGVPPNMPQRQQTLGEITLEEFLVRAGVVREDAQLAAKSNNAGGIFADLSYAGNNTGLAFGYQQPNRNTGLMAGSIPNKNGESVIQSANLPLNVNGVRSTQQQLRPQQLQQNQQPQPQPQPQPQQQPIFPKQPALPYGAPMAVPNSVQLGSPGLRAGMAGIADPALNSNFIQGANLMGGGMNMVGLGAGGVTVATASPGVSSDGLGKSNGDTPSVSPVPYVFNGGLRGRKYSTVEKVVERRQRRMIKNRESAARSRARKQAYTM…
143	Capsicum annumm	CANN_62	CA.PGAv.1.6.scaffold1041.34	CabZIP47	A	PGAv.1.6.scaffold1041	410353-412403	ATGGGATCTTACATGAACTTCAAGAACATTGCTGACACACCACAGCCAGAGAGCAACACGGGGAAGTCAATGGGTAATGGTGATCTCCCTTTGGCTAGGCAATCTTCCATATACTCGTTGACGTTTGATGAGCTTCAAACTACATTTAGTGGACTTGGAAAAGATTTTGGATCAATAAATATGGAGGACCTGTTGAAAAGCATTTGGTCAGCTGAAGAGTCTCAAGCTGTGGTATCGTCTAATGGTGGAGGAGATGATGGGAATGGGAATCTACAGAGGCAAGGTTCTTTCACACTACCTCGGCCACTTAGGCAGAAAAGTGTTGATGAAGTATGGAGAAACTTTCAGAAAGAAACTGTTGGTACCAAAGATGAAAGTGCCTCTGAGAAATCAAGCTTT…	MGSYMNFKNIADTPQPESNTGKSMGNGDLPLARQSSIYSLTFDELQTTFSGLGKDFGSINMEDLLKSIWSAEESQAVVSSNGGGDDGNGNLQRQGSFTLPRPLRQKSVDEVWRNFQKETVGTKDESASEKSSFGQRQSTLGEMTLEEFLVKAGVVREDMQSNSNSIGITYNDGLSQQNNNSLNIAFQQPTQDTGLLINQMAANNMLNVVGATASQQQPQQQQRPLFPKQTTVAFASPMQLSNNGNLASPRTRAPAVGMSSPSGNTNNIAQGGVMGMGEFHSGVSPAKGGSPGNDFTSRSNVDTSSLSPSPYAFNEGGRGRRSGSSLEKVVERRRRRMIKNRESAARSRARKQAYTLELEAEVAKLKEINEELRKKQAEIIEKQKNQLLDKRSMPCGYKL…
144	Capsicum annumm	CANN_63	CA.PGAv.1.6.scaffold1076.3	CabZIP44	S	PGAv.1.6.scaffold1076	90481-90897	ATGTCAGCTTTAAGGCAGAGTGTTAGTTCATCTGCATCAGAAGATGATCAAAGGTATGCAGGAATGGATGAAAAGAAGAGGAAAAGGATGATATCCAACAGGGAATCGGCGAGGCGTTCGAGGATGAAGAAGCAGAAGCTTCTGCAAGATTTGACAGGTGAAGTGAGCAGATTACAGGGTGCAAACAAGAATATTGTGACTAAGATTGAAGAGACAACGGAGAGATATACAATTTGTGCTGCACAGAATAATGTGTTGAAGGCACAAGTAATGGAATTGACTGATAGGCTCAGGTATTTAAATGATGTTATTGAGAGTACTGGTTTGGCTGCTGATGTTGCTGATCCTTTGTTGAAGCCATTGCAGACTCCTTGTCCAATGCAGCCCATTGCTTCTTCA…	MSALRQSVSSSASEDDQRYAGMDEKKRKRMISNRESARRSRMKKQKLLQDLTGEVSRLQGANKNIVTKIEETTERYTICAAQNNVLKAQVMELTDRLRYLNDVIESTGLAADVADPLLKPLQTPCPMQPIASSGLFKF*
145	Capsicum annumm	CANN_64	CA.PGAv.1.6.scaffold1095.11	X	M	PGAv.1.6.scaffold1095	175930-177982	ATGAAAGACGAACAAAAAAGATCTGATGAGCTCAACTTGAATTTGAGCCTCACAACTCCCGGAGAAGCTGAATCAGTTGATAAGATTCAAACTCTGGATGAAGCAATGACTTTTGAACTCAAGCACCATGAAGACCTCAGTCTTGCTGATGAGAAGAAGTTGAGAAGGAGAATATCAAATAAATTGGCTGCTCGAAGAAGTAGGTTCAGGAAGCTCACTCACAAAAACAAATTGGAACAAAACTTCAAAGATCTTCAGGATGAAATAGCTCTGGTGGGATCAAAAATAAAAAATATGAAAAATTATAATGATAAGTTGCGGGTGGAGAATGAAATGTTGCGAGAACGATTAAATAACATCACTGACAAAGCCACTCAAGCAACTGCAAAAATTGAAGAA…	MKDEQKRSDELNLNLSLTTPGEAESVDKIQTLDEAMTFELKHHEDLSLADEKKLRRRISNKLAARRSRFRKLTHKNKLEQNFKDLQDEIALVGSKIKNMKNYNDKLRVENEMLRERLNNITDKATQATAKIEEVKLELQMLKMNLAKAQEYQHYMKIGGESFDFYNHDELESAPEIDINQYLNLDDDM*
146	Capsicum annumm	CANN_65	CANN_bZIP.PGAv.1.6.scaffold1095.1	X	M	PGAv.1.6.scaffold1095	277720-280393	ATGAAGAGAAAACAAAACAAATCTGAAGAACCTAATTTGGATTTGTCTCTCGCAACGCCAGCTGCAGTTGATCCAATTATCAAGATTCCTACCCTTGAAGAAGCAGTGAATTCTGAACTTTGCCAAGGTCATGGAGACCCCAATGTTGATGTGCAAAAGTTGAGAAGACTAGCTGCACAAAGATCCCGAGCCAAGAAGGTTGAATACACTGCTAATTTAGAAAAGAAGGTCAAAACTCTCCAGGCTCAAGAAGAAGAGTATATGAAGGGAGAAAGTTTCAACTTCTATAATTATGATGAAGCAGAATCAGCTGAAGAGGTAGACATGAACAACCACATTAATACAGACCAGTATGTCAACTTTGATGACATGAACGTCGACCCACACAAGAATGACATG…	MKRKQNKSEEPNLDLSLATPAAVDPIIKIPTLEEAVNSELCQGHGDPNVDVQKLRRLAAQRSRAKKVEYTANLEKKVKTLQAQEEEYMKGESFNFYNYDEAESAEEVDMNNHINTDQYVNFDDMNVDPHKNDM*
147	Capsicum annumm	CANN_66	CA.PGAv.1.6.scaffold1329.1	CabZIP49	I	PGAv.1.6.scaffold1329	8087-10632	ATGGCTAGTGACAATGATGAAGGTAGTAGTGATATGGTACAAAGACTGCAATCATCATTTGGTACATCATCTTCTTCACTACCTAAACAGTTACAGCCTATTTCAGTGAACCAATTGGACATACCACAGTTGACTACTTCCCAATTTAGGGGTCAAATGAGGCAATTTTCTCCAAATTTTGGCGTTGATAATAGTAAAAGAGTAGGTATACCACCTTCTCACCCGCAAATGCCTCCTATTTCGCCATATTCTCAGATCCCTTTAACCAGGCCAGGCAATCAGCAAATGGGTATGCAGAATTTTAGTCCAGGGGCATCACATTCGCGATCTTTATCACAACCAGCATTTTTCTCACTTGATTCCTTGCCACCCTTGAGCCCTTCACCGTATAGGGAATCC…	MASDNDEGSSDMVQRLQSSFGTSSSSLPKQLQPISVNQLDIPQLTTSQFRGQMRQFSPNFGVDNSKRVGIPPSHPQMPPISPYSQIPLTRPGNQQMGMQNFSPGASHSRSLSQPAFFSLDSLPPLSPSPYRESPSTSMSDPMSADVSMCDQDGNSHSLLPPPPFSRCNSSRAGERESLPPRKAHRRSNSDIPFGFSAIMQSSPPLAPLRSVPSRDNSGGKPAQLVKRETMWDRGNENNNVEGMGERKSEGEVVDDLFSAYMNLDNIDAFNSSGTDEKQGNENREDLDSRASGTKTNGGDSSDNEATSSVNDSGGSMQKLGMSSSVEKREGIKRSAVGDIAPTTRHYRSVSMDSFMGKLNFIDDSPKLPPSPGPRPGQLSPTNSLDGNSNSFSLEFGNGE…
148	Capsicum annumm	CANN_67	CA.PGAv.1.6.scaffold1544.2	CabZIP48	S	PGAv.1.6.scaffold1544	22079-22591	ATGGCTTCTTCAAGTGGTACATCATCAGGTTCATCATTTCTTCAGAACTCAGGGTCAGAAGAAGATCTTCAGCTGTTAATGGATCAGAGGAAGAGAAAAAGAATGATATCAAACAGGGAATCAGCAAGAAGATCAAGAATGAGAAAGCAAAAACACTTAGATGATTTGATGGCCCAAGTATCAACACTAAGAAAAGAGAATGACCAGATATTGACAAGTATGAATGTCACAACACAGCATTATCTTAATGTTGAGGCTGAAAATTCAATCTTGAGAGCTCAATTAAGTGAACTTAGCCATAGGCTTGAGTCACTTAATGAAATCATTGCATATATGGATGCCAACAACAACAACAACAGTTGTAGTAATGGTCTTGCTATGGACCACAATGAGCCATAT…	MASSSGTSSGSSFLQNSGSEEDLQLLMDQRKRKRMISNRESARRSRMRKQKHLDDLMAQVSTLRKENDQILTSMNVTTQHYLNVEAENSILRAQLSELSHRLESLNEIIAYMDANNNNNSCSNGLAMDHNEPYSFNFAQSDTVVDGFNMTNSWNYFCSNQPIMTAHVLQY*
149	Capsicum annumm	CANN_68	CANN_bZIP.PGAv.1.6.scaffold1702.1	CabZIP46	A	PGAv.1.6.scaffold1702	159909-165522	ATGGCGTCAAAGGTGATGTTGTCAGCATCAACAACAACGCCTAATTCGGATCCTTCTTCTTCTTCTCTTCATCCCCACCCTATTACTTCTTCTTCTTCTTCTTTACATCATCAACTTCACTCTCATCCTTCTACGAACTTCGGTTCTATGAACATGGATGAAATTCTTCATAACATGTATTCTGATTCTGACCCTTTTGCTTCTGACCCCACCGCCACCGATGCTGCCGCTGTTAATCCTGTTTCCGGTGGTGGGGATGTGGGGCCCAGTAAGACTGTGGATGAGGTGTGGAGGGAGATTGTAGCAGCGGGTGGGGGTAGGAGTAGGGAGCCGGAGATGACTCTGGAGGATTTCCTGACGAAAGCTGGTGCGGTTACAGAGGAGGATGTTAGAGTTCCG…	MASKVMLSASTTTPNSDPSSSSLHPHPITSSSSSLHHQLHSHPSTNFGSMNMDEILHNMYSDSDPFASDPTATDAAAVNPVSGGGDVGPSKTVDEVWREIVAAGGGRSREPEMTLEDFLTKAGAVTEEDVRVPRRSTVEELPADKATQQKQRRMIKNRESAARSRERKQAYTVELESLVTQLEEENARLLREEEEKNKERLKQIMENLIPVVEKRRPPRILRRVRSMSWLFSHGILTPTLDSKVRRDQQ*
150	Capsicum annumm	CANN_69	CA.PGAv.1.6.scaffold20522.1	X	X	PGAv.1.6.scaffold20522	248-733	ATGTTACAGGCAGAACTAGATTCACGGACACGAAGATTGGAGACAGAAAAGAATGAGTTACAATTAGTACTGGAAAAGGAGTTGGATAGAAGATCCAGCAATTGGTCTCTAAAACTTGAGAAATACCAAATTGAACAACATAGACTCCGTGAAAGGGCAAGGGAGCTTGCAGAGCAGAATATCTCTCTACAAAGGGAAGTCTCTTCATTTAATGAGAAGGAAGTAGATAATAGAATCAAGATGTCATTTTCGGAGAAACAACTTGAAGATTTGTCTAAGAGAGTAGAGCAAGTGTCAGAGGAGAATCAAAATCTAAGGCAGCAGCTCACTCAGTTACAAGAGGAATATCGAGTAACTCAAGACAATAGAGATTATGTCCAGGAAAACTACCAAGAAAAG…	MLQAELDSRTRRLETEKNELQLVLEKELDRRSSNWSLKLEKYQIEQHRLRERARELAEQNISLQREVSSFNEKEVDNRIKMSFSEKQLEDLSKRVEQVSEENQNLRQQLTQLQEEYRVTQDNRDYVQENYQEKVKELKSKTLLTTVLREKLYSEEMDIKQL*
151	Capsicum baccatum	CBAC_1	CB.CBv1.2.scaffold678.8		G	Chr01	19289126-19301905	ATGGGTAGCGGTGAGATGGATAAATCCTCAAAAGAGGCGAAGGATGCAAAAGAGTCGAAGACTCCCAATTCACAGGAGCAGACTTCTACTCCTACCGCTGGCCCAGTCAATCCAGATTGGTCTGGCTTTCAGGCATATTCTCCTATGCCTCCACATGGGTTTATGACATCAAGTCCTCAAGCACCACACCCCTATATGTGGGGAGTCCAGCAATTTATGCCACCCTATGGTACTCCACCACATCCATACGTTGCAATGTATCCCCATGGTGGTATATATGCTCATCCATCTATGCCTCCGGGATCTTACCCTTTCAGTCCTTTTGCAATGCCTTCTCCAAATGGCGTTGCTGAAGCTTCAGTTAGCAACCCTGGTAATGTCGAAGTGGACGGTAAGTCA…	MGSGEMDKSSKEAKDAKESKTPNSQEQTSTPTAGPVNPDWSGFQAYSPMPPHGFMTSSPQAPHPYMWGVQQFMPPYGTPPHPYVAMYPHGGIYAHPSMPPGSYPFSPFAMPSPNGVAEASVSNPGNVEVDGKSSEGKEKLPIKRSRGSLGSLNMITGKNNGPGKTSGASANGVHSKSAESGSEGSSEGSDAHSQNESPMNSGGRQDSADTSQNGNAAHGSQNGGTAATHSMINQTMAIVSAPGAGGIPGPATNLNIGMDYWGAATSSPIPAMHGRVPVSVAGGLVTAGSRDSVQSQMWIQDERELKRQKRKQSNRESARRSRLRKQAECDELAQRAEVLKEENAALRAEVNRIRSDYEHLLAQNASLKERLGEVPGEEVPRTGQDDHHSSQTESHQGDQ*
152	Capsicum baccatum	CBAC_2	CB.CBv1.2.scaffold567.15		G	Chr01	26853416-26860763	ATGGGGAGCAGTGATATTGACAAATCCTCTAAGGAGGCAAAGGAGGCAAAGACTCCCAATTCACAGGAGCAGGCTTCATCTGCCGCCACTGGTACAGTAAATCCAGATTGGTCCGGTTTTCAGGGTTATTCTCCGATGCCTCCACATGGGTTCATGGCTTCAAGTCCTCAAGCACACCCTTACATGTGGGGAGTTCAGCATCTTATGCCACCCTATGGTACTCCACCACATCCTTATGTCGCAATGTATCCCCATGGTGGAATATATGCTCATCCATCTATTCCTCCGGGATCTTACCCCTTTAGCCCCTTTGCGATGCCTTCTCCAAACGGCATTGCCGAAGTTGCAGTCAACACCTCTGGCAATGCTGAGGTAGATGGTAAATCATCTGAGGGAAAG…	MGSSDIDKSSKEAKEAKTPNSQEQASSAATGTVNPDWSGFQGYSPMPPHGFMASSPQAHPYMWGVQHLMPPYGTPPHPYVAMYPHGGIYAHPSIPPGSYPFSPFAMPSPNGIAEVAVNTSGNAEVDGKSSEGKEKLPIKRSKGSLGSLNMITGKNNEHVKTSGASANGGYSKSAESRSGEGSSEGSDANSQNESPMKSAGGQDSAEEASQNGNSAHSSQNGGISAPHSLVNQTMAIMPMSAVGAGGVPGPTTNLNIGMDYWNAAASPSIPAIHGKVPPASVAGGMVTAGSRDIVQSQMWIQDERELKRQRRKQSNRESARRSRLRKQAECDELAQRAEVLKEENASLRAELSRLRSEHDQLAAQNASLKERLGEVPGRDDPRPSRNDIPLNNDIQHSSQ…
153	Capsicum baccatum	CBAC_3	CB.CBv1.2.scaffold680.2		B	Chr01	52707551-52710122	ATGGCGAATTCAAATCCTCCATCAGACCAAGTCATTCTTGACGACCTCGAACCCGACCTCGATCTCGACTTATCATTCGACGACATCATCCCTCCTTCCGAGGCTGATGCTGCAGCTTTTCTCAACCCGAATACTCTCACTTTTCCCCATTCATGTTTGGAACCCGATCGGGTTGACCCGAGTCCGAATCCAGTGGGTCAACCCGGGAGTCAACTGATCCAAACCCGAGCGTTCAAATCCTCGCCGGAACTACGTCATGTTTCCGTCGACCTGTCGGAGGCAGATCATAGCTTCGGTAATCAAAGTTCCAGTGGATCCCATGTTTTGAGCCCCGCAGCCGATGTCTCTGAATACCTCAATGTGTCATCGCTGTCGCCGGAATCGGAGTCGTCTAATCAC…	MANSNPPSDQVILDDLEPDLDLDLSFDDIIPPSEADAAAFLNPNTLTFPHSCLEPDRVDPSPNPVGQPGSQLIQTRAFKSSPELRHVSVDLSEADHSFGNQSSSGSHVLSPAADVSEYLNVSSLSPESESSNHEDLNCSSPESLGSGNCGSNILNNSVTSSLNFVDSSIECGLVEHKVKLEEVNVKYSKCSSSILKRKKVSGDCLDLKDVSKYQKSDFVVECSNVNSGGDDDKKKARLMRNRESAQLSRQRKKHYVEELEDKVRTMHSTIQDLNVKISYIMSENASLRSQMGCSSVALQMPPPPPGMYPHPGVIYPWMHCAPPYMGKPQGSQVPLVPIPRLKPQAAAPPSKSSKKVENKKTEVKTKRVASVSFLGLLFFMLLFGGLVPIVNLRYSGLKE…
154	Capsicum baccatum	CBAC_4	CBAC_bZIP.Chr01.1		A	Chr01	64442378-64458887	ATGAACAATCAGGAGAGAGAACCAACTCTTGGCGAGACAACTTTGGAGGACTACTTGGTGAAAGCTGGGCTTTTTGTTGCTGATGCATCTTTAGGACATACGATGTCACTGGATAATCCTGCGGCAATGCAAAATTATGTGCCTCCGACAGGCTTGTCACCATCCCCTTCGCTGTCTGATACGCAGATTTCTGGTCGGAAGAGGGGTGCTAGGGACATTGATAAGACTATTGATCGGAGACTAAGGAGAAAGATTAAGAATAGAGAGTCAGCTGCACGTTCCCGAGCCAGAAAACAGGCTTACCACAATGAGCTGGTGAACAAGGTTTCACATCTGGAAGAGGAAAACATGAAGCTTAAGAAAGAGAAGGAGCTGGAGAAGCTGTTATCTGAGCTGTCG…	MNNQEREPTLGETTLEDYLVKAGLFVADASLGHTMSLDNPAAMQNYVPPTGLSPSPSLSDTQISGRKRGARDIDKTIDRRLRRKIKNRESAARSRARKQAYHNELVNKVSHLEEENMKLKKEKELEKLLSELSSEPRYQLRRTTSF*
155	Capsicum baccatum	CBAC_5	CBAC_bZIP.Chr01.2		I	Chr01	78414944-78417492	ATGGCTAGTGACAATGATGAAGGTAGTAGTGATATGGTACAAAGACTGCAATCATCATTTGGTACATCATCTTCTTCACTACCTAAACAGTTACAGCCTATTTCAGTGAACCAATTGGACATACCACAGTTGACTACTTCCCAATTTAGGGGTCAAATGAGGCAATTTTCTCCAAATTTTGGCGTTGATAATAGTAAAAGAGTAGGTATACCACCTTCTCACCCGCAAATGCCTCCTATTTCGCCATATTCTCAGATCCCTTTAACCAGGCCAGGGAATCAGCAAATGGGTATGCAGAATTTTAGTCCAGGGGCATCACATTCGCGATCTTTATCACAACCAGCATTTTTCTCACTTGATTCCTTGCCACCCTTGAGCCCTTCACCGTATAGGGAATCC…	MASDNDEGSSDMVQRLQSSFGTSSSSLPKQLQPISVNQLDIPQLTTSQFRGQMRQFSPNFGVDNSKRVGIPPSHPQMPPISPYSQIPLTRPGNQQMGMQNFSPGASHSRSLSQPAFFSLDSLPPLSPSPYRESPSTSMSDPMSADVSMCDQDGNSHSLLPPPPFSRCNSSRAGERESLPPRKAHRRSNSDIPFGFSAIMQSSPPLAPLRSVPSRDNSGGKPAQLVKRETMWDRGNENNNVEGMGERKSEGEVVDDLFSAYMNLDNIDAFNSSGTDEKQGNENREDLDSRASGTKTNGGDSSDNEATSSVNDSGGSMQRLGMSSSVEKREGIKRSAVGDIAPTTRHYRSVSMDSFMGKLNFIDDSPKLPPSPGPRPGQLSPTNSLDGNSNSFSLEFGNGE…
156	Capsicum baccatum	CBAC_6	CB.CBv1.2.scaffold667.77		S	Chr01	79422624-79423136	ATGGCTTCTTCAAGTGGTACATCATCAGGTTCATCATTTCTTCAGAACTCAGGGTCAGAAGAAGATCTTCAGCTGTTAATGGATCAGAGGAAGAGAAAAAGAATGATATCAAACAGGGAATCAGCAAGAAGATCAAGAATGAGAAAGCAAAAACACTTGGATGATTTGATGGCCCAAGTATCAACACTAAGAAAAGAGAATGACCAGATATTGACAAGTATGAATGTCACAACACAACATTATCTTAATGTGGAGGCTGAAAATTCAATCTTGAGAGCTCAATTAAGTGAACTTAGCCATAGGCTTGAGTCACTTAATGAAATCATTGCATATATGGATGCCAACAACAACAACAACAGTTGTAGTAATGGTCTTGCTATGGACCACAATGAGCCATAT…	MASSSGTSSGSSFLQNSGSEEDLQLLMDQRKRKRMISNRESARRSRMRKQKHLDDLMAQVSTLRKENDQILTSMNVTTQHYLNVEAENSILRAQLSELSHRLESLNEIIAYMDANNNNNSCSNGLAMDHNEPYSFNFAQSDTVVDGFNMTNSWNYFCSNQPIMTAHVLQY*
157	Capsicum baccatum	CBAC_7	CB.CBv1.2.scaffold916.7		D	Chr01	85880896-85893014	ATGGCAGGCATCAGTGCTGTGACTGATACGTCAACGGATGCTGATACAGATGATAAAACCTTAGGGTTTCATAACTCTCAAGCACTGGGTGCTGTTTCTGATGGAAGTGACAAAACAAGAGATCAAAAGACGCTTCGTAGGCTTGCCCAAAATCGTGAAGCCGCACGAAAGAGTCGTCTAAGGAAAAAGGCATATGTTCAACAGTTAGAGAGTAGTAGAATGAAGCTGACACAGCTTGAGCAAGAGCTTCAACGAGCTCGTCAACAGGGCATATATGTTTCAAGTTCAGGAGATCAATCACAGTCAATGAGTGGAAATGGAGCTTTGGCATTTGATGTTGAATATGCACGATGGCTGGAAGAGCACAACCGGCGTGTAATTGAGCTGAGAGGAGCTGTA…	MAGISAVTDTSTDADTDDKTLGFHNSQALGAVSDGSDKTRDQKTLRRLAQNREAARKSRLRKKAYVQQLESSRMKLTQLEQELQRARQQGIYVSSSGDQSQSMSGNGALAFDVEYARWLEEHNRRVIELRGAVSSHAGDGELRIIVDGILAHYDDLFRIKGSAAKADVFHILSGMWSTPAERCFLWLGGFRSSELLKLLINQLEPLTEQQLLAINNLQQSSQQGEDALSQGIEALQESLAETLVGSLGPSGSSGNVAYYMGQMAMAMGKLGTLEGFIRQADNLRQQSLQQMHKILTTRQSARALLAISDYFARLRALSSLWLARPRE*
158	Capsicum baccatum	CBAC_8	CBAC_bZIP.Chr01.3		St	Chr01	87815564-87822801	ATGATGGCGGTGACATCAAGCTGTAAAGACAAACTGGGGATGGACAGTGGTAAATATGTGAGGTACACCCCTGAGCAAGTAGAGGCTTTGGAGAGGTTATATCATGAATGTCCAAAACCCAGTTCCCTTCGTCGTCAGCAGCTCATTCGGGAGTGTCCAATTCTGTCCAACATCGAGCCAAAACAGATCAAAGTTTGGTTCCAGAACAGAAGGTGTAGAGAGAAGCAACGTAAAGAATCATCGCGCCTTCAAGCCGTGAATAGAAAATTGACAGCAATGAATAAGCTGTTGATGGAAGAGAATGATAGGCTGCAGAAGCAAGTTTCACAGTTGGTGTATGAGAATAGCTTTTTCCGCCAACAGACTCAAACTGCAGCCCTTCCTGCCACAGACAACAAT…	MMAVTSSCKDKLGMDSGKYVRYTPEQVEALERLYHECPKPSSLRRQQLIRECPILSNIEPKQIKVWFQNRRCREKQRKESSRLQAVNRKLTAMNKLLMEENDRLQKQVSQLVYENSFFRQQTQTAALPATDNNSCESVVTSGQHNLTPQRPPRDASPAGSSLTCLWPCGSRAYKMDVLNVMSTGTGGTIELLYMQLYAPTTLAPARDFWLMRYTSVMEDGSLVALRHLRQISQEISHPTVTGWGRRPAALRALGQRLSKGFNEAVNGFTDEGWSMLESDGIDDVTILVNSSPSKLMGANLSYANGFPSMSSAVLCAKASMLLQLCNGVDDNAVGTCAELMFAPIDASFADDAPLLPSGFRIIPLDSKSDASSPNRTLDLASTLEVGPAGSRPTGDHSKS…
159	Capsicum baccatum	CBAC_9	CB.CBv1.2.scaffold451.3		S	Chr01	196939078-196939512	ATGGCTTCGGCTCAGCAACCAGCTAGTTCGGGCTCTGATGGCCAGAAATATGCTAATTGTGATGAGAGAAAACGAAAGAGAATGGAGTCCAACCGTGAATCTGCAAGGCGGTCACGGATGAGGAAACAGCAGCATTTGGAGGAGTTGATGAGTGAATTGACGCAGCTGCAAAATCAGAACACTATTTGGAGCGAGAGGATTGATGATGTTGGAAAAAACTATCACACAGTCGAAGCAGAGAACAATGTCTTGAGGGCTCAAATTGCTGAACTGACTGAACGCTTGGATTCCCTTAATTCGCTCACTCGTTTCTGGGCTGATGCTAATGGACTTGCTGTGGACATCCCTGAAATTCCAGACGCTTTGCTTGAGCCCTGGCAGCTCCCTTGCCCAATTCAA…	MASAQQPASSGSDGQKYANCDERKRKRMESNRESARRSRMRKQQHLEELMSELTQLQNQNTIWSERIDDVGKNYHTVEAENNVLRAQIAELTERLDSLNSLTRFWADANGLAVDIPEIPDALLEPWQLPCPIQPITASADMLQF*
160	Capsicum baccatum	CBAC_10	CB.CBv1.2.scaffold578.4		G	Chr02	9038979-9045951	ATGGGGACTGGGGAAGAGAGCACCCCTACAAAGCCTTCGAAAGCTACTTCAACTCAGGAGGCACAATCTACACCTTCCTATCCTGATTGGTCTTCTATGCAGGCTTATTATGGTGCTGGAGCTGCACCTCCCTTCTTTCCCTCAACTGTTGCTTCTCCTACTCCTCACCCATACATGTGGGGAAGCCAGCATCCGCTTATGCCTCCTTATGGAGCTCCAGTCCCATATCCTGCTTTATATCCTCCTGCTGGAGTTTATGCTCATCCTAATATGCCCATGACTCCAAACACACTGCAGACAAATCCAGAATCAGATAATAAGGCACCTGATGGTAAGGACCAGAATACAAGCAAAAAATTGAAGGGAAGTTCAGGCGCCAAGACAGGAGAGAGTGGGAAA…	MGTGEESTPTKPSKATSTQEAQSTPSYPDWSSMQAYYGAGAAPPFFPSTVASPTPHPYMWGSQHPLMPPYGAPVPYPALYPPAGVYAHPNMPMTPNTLQTNPESDNKAPDGKDQNTSKKLKGSSGAKTGESGKAASGSGNDGARRSAESGSEGSSGDNDENDNHEFSADKSRSFDLMLANGANAQNNPATGNPVAMPATNLNIGMDLWNAPSAGPGMIKMRSNQPGFSPASGLGHEWIQDERELKRQKRKQSNRESARRSRLRKQAECEELQHKVETLSNENHGLKEELRKLSEECEKLASENNSIKDELTRLCGPEAVSKLESSSNAMHLQSNVDEANS*
161	Capsicum baccatum	CBAC_11	CBAC_bZIP.Chr02.1		A	Chr02	39944991-39945719	ATGCGGTCGTCAAGTAGTGAAGAACACCAACAACAACTCAAAGGTCTAGACAAGAACCTTGCAACTTATTCTTCAAAATCATCATCACCATCATCATCCACATCTTCTAGCAATAATTACCCAATTAATCCTGTACTAATAAATAGTAAAACCATGGAAGAAGTTTGGAAAGACATAAATCTTTCTTCTCTCAATGACCACACTTGTTCTAGAGCTCACATGGACCCTCAAAGTACTACTGCTAGCACAATCAATTTTGGTGGCATGATTTTGCAAGATTTATTGGCAAGACCATTTGCTAGTGACCCTCCAACAGCAACAACAGCCTATGGTTCCCCTGTTCCTCCCCCTCCACCTGTTACCATGTTGACACTGAATTCTGGCCCTGAACTTCGTTTC…	MRSSSSEEHQQQLKGLDKNLATYSSKSSSPSSSTSSSNNYPINPVLINSKTMEEVWKDINLSSLNDHTCSRAHMDPQSTTASTINFGGMILQDLLARPFASDPPTATTAYGSPVPPPPPVTMLTLNSGPELRFFSSLDPSRKTSICLPKNISNSSTFEALASPAAGRNANGKKRHPESDNHSGDQKTKRMIKNRESAARSRARKQESFASLCMPFKIECVMFLRCYRLRAAPTKCVSYRPST*
162	Capsicum baccatum	CBAC_12	CB.CBv1.2.scaffold172.31		St	Chr02	122557252-122564157	ATGGATACTAGCAAGTATGTGAGGTATACACCAGAACAAGTGGAGGCTTTGGAGAGGGTTTATGCAGAATGTCCAAAGCCAACTTCTATTAAGAGGCATCAGCTCATTAGGGAGTGCTCCATTCTTTCAAATGTTGACCCTAAACAGATCAAAGTATGGTTTCAGAACAGAAGATGTCGCGAGAAACAGAGAAAGGAGGCATCTCATCTCCAAACTGTTAATAGGAAGCTGACTGCTATGAACAAACTGTTGATGGAAGAGAATGACAGATTGCAGAAGCAAGTTTCGCATCTTGTGTATGATAATGGATATATGCGTCAACAACTACATACGGTTAACAGTACGACCACGGATACGTGCTGTGAGACTGTGGTCGTGAGTGGTCAGCAGCAGCAACAG…	MDTSKYVRYTPEQVEALERVYAECPKPTSIKRHQLIRECSILSNVDPKQIKVWFQNRRCREKQRKEASHLQTVNRKLTAMNKLLMEENDRLQKQVSHLVYDNGYMRQQLHTVNSTTTDTCCETVVVSGQQQQQNPMAQHPQRDVNSPTGLLAIAEETLAEFLSKATGTAVDWVQMIGMKPGPESIGIVAVSRNCDGVAARACGLVSLEPMKVAEILKDRPSWYHDCRCLDILSVIPTGKGGTIELIYLQTYAPTTLASARDFWTLRYTTSLEDGSLVICERSLTPTTGGPPATSSVRATMLPSGYLIRPFEGGGSIIHIVDHIDLDACSVPEVLRPLYESSKILAQKMTMAAFRYVRQIAQETNGEIQYVGGRQPAALRAFSQRLCRGFNNAVSGFIDD…
163	Capsicum baccatum	CBAC_13	CB.CBv1.2.scaffold2042.17		A	Chr02	141210664-141211233	ATGTGGTCATCCAGCAGTGACAATAGGGGGCTATCAGCTTCTTCTAAATCAACATCATCATCTGCTTCTTCTTCATCTCATTCCCCATTTTCTCCAAGACTTAAAACCATGGAAGAAGTGTGGAAAGACATTAATCTTTCTTCTCTTCAAGATCATACTACTAATAATTACTCTACAGATCATGATCATCATCAAGGTGCTAATTTTGGTGGAACCATTTTACAAGATTTCTTGGCTAGACCTTTTGCTAACGAACCTTCACCACCAGCAGCTGCTGCAGCAACAGCCTCTCCTGTACCAGCTTCAACTATGCTGAATTTGAACTCTGTTCCGGAGTTTCACTTCTTTGATAACCCTTTAATGCAAAACTCAATCTTGCACCCATCAACTGATAGTTGT…	MWSSSSDNRGLSASSKSTSSSASSSSHSPFSPRLKTMEEVWKDINLSSLQDHTTNNYSTDHDHHQGANFGGTILQDFLARPFANEPSPPAAAAATASPVPASTMLNLNSVPEFHFFDNPLMQNSILHPSTDSCQVVPNVSGRKRVVPEADNNSGGDRKNQRMIKNRESAARSRARKQESAIHFFIFIVL*
164	Capsicum baccatum	CBAC_14	CB.CBv1.2.scaffold676.14		G	Chr02	145575729-145583533	ATGAGAGAAGAGAGCACTCCTACAAAGCCTTCAAAGCCAGCTTCAACTCAGGAGACACCAACTGCACCTTCGTATCCTGATTGGTCAAGCTCTATGCAGGCTTATTATAGTGCTGGAGCTACTCCTCCCTTCTTTGCCTCACCCGTTGCTTCTCCTGCTCCCCACCCGTACTTGTGGGGAGGTCAGCATCCTCTTATGCCTCCTTATGGGACTCCAGTCCCATATCCAGCTTTATATCCTCCTGCCGGAGTTTATGCTCATCCTAACATGGCCATGCCATCTCCAAATACTGCGCAGGCAAATCCAGAATCAGATGGGAAGGGTACGGAAGGGAAGGATCGGAATTCTAGCAAAAAGTTAAAGGCCTCTTCTAGTAGCAAGGCAGGGGACAACGGGAAA…	MREESTPTKPSKPASTQETPTAPSYPDWSSSMQAYYSAGATPPFFASPVASPAPHPYLWGGQHPLMPPYGTPVPYPALYPPAGVYAHPNMAMPSPNTAQANPESDGKGTEGKDRNSSKKLKASSSSKAGDNGKVTSGSGNDGATQSDESRSEGTSDTNDENDNHEFAANKKGSFDQMLADGASAQNNPATVNYPTSIHGNPVTVPATNLNIGMDVWNASSAGPGAIQMQPNASGPVIGHEGRINDQWMQDERELKRQKRKQSNRESARRSRLRKQAECEELQRRVEALTNENHSLKDELQGLSEECEKLTSENNSIKEELTRWCGPDAVSKLESSGTNATHAQSNVEEAS*
165	Capsicum baccatum	CBAC_15	CB.CBv1.2.scaffold1372.24		S	Chr02	146985016-146985450	ATGACTTCTCCTGGCGGACCTTCTTCATCAGGGTCAGAGGATCTACAACAGCTAATGGATCAAAGGAAGCGCAAAAGAATGATATCGAACAGGGAATCAGCAAGAAGATCAAGAATGAAGAAGCAGACACATTTGAATGAATTAATGGCTCAAGTGAATCAACTCAAGGAACAAAACAACCAAACTGTCACAAACATAAATAGGGTCACACAGGTTTATTTGAACGTGGAGGCACAGAATTCTGTTCTCAGAGCACAAATGGCGGAGTTGAGTCATCGGCTTCAGTCTTTAAATGAGATTATAAATTGCATCAACTCAGCAAACTCAACAATTGATGAAACACAGGTTATTGGTGATGATGGTTTCTTCAATCCTTGGAATTTGCTTCATGTTAATCAG…	MTSPGGPSSSGSEDLQQLMDQRKRKRMISNRESARRSRMKKQTHLNELMAQVNQLKEQNNQTVTNINRVTQVYLNVEAQNSVLRAQMAELSHRLQSLNEIINCINSANSTIDETQVIGDDGFFNPWNLLHVNQPIMASADAFMY*
166	Capsicum baccatum	CBAC_16	CB.CBv1.2.scaffold1381.5		S	Chr02	151769055-151769720	ATGTTGTCCACTTTGTCGGCCACTACTCTGTCCTCCGATGGAGTTTTTTCTAATTCATTCCCGGCTTTTGATGGTGGTTTTACTCCTTGGGAATGTATCGAACCGGCTTTTCTATTTCCACGAGATGTGGAAGAAGAAGAAGAGCCGGTTCTTTCTCCCAAGCAATCCCCACCACCTGAACCGGTTATTTTGAACTCCGATTCAGGGTCTGATGACTCCAAACCGAATTCCATTCACTCTAGTTCCGGTTCAGATGAACCGAACCGGAATAATAACAACCACTCGAACCGCTGTCCTGACGAGAGAAAACGCCATCGTACGACATCGAACCGGGACATAGACGAGAGAAAGCGCCGTCGTATGGTATCGAACCGGGAATCAGCTAGGCGTTCCCGCATG…	MLSTLSATTLSSDGVFSNSFPAFDGGFTPWECIEPAFLFPRDVEEEEEPVLSPKQSPPPEPVILNSDSGSDDSKPNSIHSSSGSDEPNRNNNNHSNRCPDERKRHRTTSNRDIDERKRRRMVSNRESARRSRMRKQKHLENLRNQVNRLKIGNRELMNRLRLITHQYQIFQCDNERLKTESAILGQRLEDIREILRARQLQQQFNSYFAWPCSNYMEQRPH*
167	Capsicum baccatum	CBAC_17	CB.CBv1.2.scaffold616.9		S	Chr02	155050254-155050796	ATGCAACCCACTGATGTCACAGACTTCTACTACCTACTTCCTTCTAACTCAACTCAATTCCCATCTCAATCCTGTGCGAACTATAACACGTCCACATTTCAGCTAAATAGGCTCTTGAACCCTTTATGTCATCTTCAGATCACTCCCCAAGTTCAAGACCTCAATCCACAACTAACATGTTTCAACAGTAACTCTACATCAGACGAAGCTGATGAGCAACAGTTAACTCTAATAAATGAACGTAAACAGAGAAGAATGATATCTAATAGAGAGTCTGCAAGGAGATCACGAATGCGCAAGCAGAGGCACCTAGATGAGCTTTGGGCACAGGTTGTTTGGCTCCGAAATGAGAATCACCAGCTCCTGGACAAACTAAATCATGCTTCTGAGCGTCATGAT…	MQPTDVTDFYYLLPSNSTQFPSQSCANYNTSTFQLNRLLNPLCHLQITPQVQDLNPQLTCFNSNSTSDEADEQQLTLINERKQRRMISNRESARRSRMRKQRHLDELWAQVVWLRNENHQLLDKLNHASERHDQVLQENAQLKNEASELRQMITDMQLSSPCPISRALENEPCSGLPQNE*
168	Capsicum baccatum	CBAC_18	CB.CBv1.2.scaffold442.10		I	Chr03	12778450-12784134	ATGGACCCGAAGTTCGCCGGAAAGCCCATACCCGCTCCATTTCTAGCGGGTCGAACTGACCTTGACCAGATGCCCGATACTCCTACCCGTATTGCCCGTCACCGTCGAGCTCAATCGGAGACTTTCTTCCGGTTCCCGGACTTTGACGATGATATTCTACTGGACGACGTCGTTGCTGACTTCAACATCGACATTTCTGCGCCGTCGGCTGATACACATATGCAACAGCCGGCTAATTCGGCTGACTCGTCATCAACCGGACCCCTTTTTGCTGGACCGTCTGGTGGTGATCAAAACCCTAGACCGTTGAATCATTTCCGGAGTCTGTCAGTTGACGCTGACTTTTTTGATGGGTTGGAGTTTGGTGATGTTGGAGCAGCGACAACACCGGCGACGGCG…	MDPKFAGKPIPAPFLAGRTDLDQMPDTPTRIARHRRAQSETFFRFPDFDDDILLDDVVADFNIDISAPSADTHMQQPANSADSSSTGPLFAGPSGGDQNPRPLNHFRSLSVDADFFDGLEFGDVGAATTPATAKEEEKWVMGSGSGSGSRHRHSNSMDGSFSTASFEAESSVKKAMAPDRLAELALIDPKRAKRILANRQSAARSKERKIRYTNELERKVQTLQTEATNLSAQITVLQRDNSGLTTENKELKLRLQALEQQAHLRDALNEALREELQRLKIAAGQMTAANGTRGSRPHFPPQPQSFVQCGNLHSQQQQQPQSNTSSQNIGGQTQPGFMNFSNRG*
169	Capsicum baccatum	CBAC_19	CB.CBv1.2.scaffold14.1		E	Chr03	33614368-33619624	ATGGCACACTTACCACCAAGAGCGCCTAACATGACACCAAATTGGCCTGATTTTTCGCTTCATCAAAAAATTGAAAACTTAGCTCCGTCCCCCCATAATTTATGGGCGGACGAATTCCTCGACTCATCATCGAGGCGCGGGTCCCACCGGAGATCCATGAGCGACTCCATTGCATTCTTGGAGTCGCCCATGGTGGAAGAATGTCGTAGGCTATCCAGTACTACTCCAGGGTCCAGTGGGACAACTAACGGTCACGAGGAATTCGAGAGGTTTGATGACGAGCAACAAATCATGTCCATGTTCAACGACGACATAAACGACATGTCCTGCTCGAATCCATCATCACCTTCGGATTATATCAACGTTAATGAAGATAAAAAGATCAACGGCCCTGATCAG…	MAHLPPRAPNMTPNWPDFSLHQKIENLAPSPHNLWADEFLDSSSRRGSHRRSMSDSIAFLESPMVEECRRLSSTTPGSSGTTNGHEEFERFDDEQQIMSMFNDDINDMSCSNPSSPSDYINVNEDKKINGPDQLMQQLNSDQNEEIQSSCKTNEELAPANQNASTNNECSSERVVDPKRIKRILANRQSAQRSRVRKLQYVSELERSVTTLQAEVSVLSPRVAFLDHQRLLLNVDNSALRQKIAALAQDKLFKDAHQEALKVEIERLRQIYYQQQMDNTTTPVADSTTAPPEIKVQLRVN*
170	Capsicum baccatum	CBAC_20	CB.CBv1.2.scaffold1524.28		A	Chr03	60815182-60815673	ATGGAAGCTGTTGCTGGGAAGGTAATTGACCTTATAGAGAAGGCCGATAGAGCAGACGATATGAAGACACGGGTTGAGAATCAAGAGCGATCTGGGAGGAAGAAGAGGAAACAAGAAGTTGAATCTTGGCTTAATGAGGTTGAACAGCTCAAAGAAGAATTTCATCAGTTAAAAGAAGAAGCAACAAGAGGGAAGAAAAATATAGGTGATTTGGAGAAGATGGATGAAAGGGTCGGAGAACTTCTCGAGCAAAGTAGAGATTTTGGAGAGCTCGTGTGTGATGTTTATGAAAGCGAGTGTCCAATGCAGGTGCAACCAGTTCAGGAGGAGAAGTCAAAACAGAATTTAGACTTGACCTGCTTAGCTGCTTTGTGGACAATTTTCTGTCACGGACTACTT…	MEAVAGKVIDLIEKADRADDMKTRVENQERSGRKKRKQEVESWLNEVEQLKEEFHQLKEEATRGKKNIGDLEKMDERVGELLEQSRDFGELVCDVYESECPMQVQPVQEEKSKQNLDLTCLAALWTIFCHGLLL*
171	Capsicum baccatum	CBAC_21	CB.CBv1.2.scaffold1466.16		D	Chr03	288828205-288833068	ATGAATTCTTCAACATACACTCAGTTCGTTGCCTCAAGAAGGATGGGTATATGCGAGCCACTACATCAAATTGGCATGTGGGATGATTTCAATGCCAGTTGCCCGAGTACATCGGCAACAATGATTCTCGAAGTTGAGAAATGCCTAGAGGAGCAGATACCTATTATGGAGAAAAGATTAGACAATGAGATAGAAGATACTTCGCATGGAACAGTAGGGACTTCTAATAGATATGAAGCAGAAACAAGTAAACCCATCGAGAAGGTACTTAGACGTCTTGCACAAAACCGTGAGGCTGCTCGTAAAAGCCGTTTGCGGAAGAAGGCCTATGTTCAACAGTTAGAAAATAGTAAATTGAAGCTGATTCAATTGGAACAAGAACTAGAACGGGCCAGAAAA…	MNSSTYTQFVASRRMGICEPLHQIGMWDDFNASCPSTSATMILEVEKCLEEQIPIMEKRLDNEIEDTSHGTVGTSNRYEAETSKPIEKVLRRLAQNREAARKSRLRKKAYVQQLENSKLKLIQLEQELERARKQGLYVGGGLDASQLSYSGTASSGTAAFDTEYGQWVEEQNRQTNDLRNALYHSQISEADLRVIVDGCLNHYSNLFRIKATAAKDDVLYIMSGMWKTSAERFFMWIGGFRPSELLKVLTPHLQLLTEQQLREVCNLTQSCQQAEDALSQGMVKLHQILAEAIAAGRLGEGNYSLPQMGPAIEKLEALVRFVNQADHLRQETLQQMSRILNTHQAAQGFLALGEYFERLRVLSSQWATRLREPA*
172	Capsicum baccatum	CBAC_22	CB.CBv1.2.scaffold989.11		S	Chr04	23553550-23554050	ATGGCTTCTTTTAGTGGAACAACTTCAGGATCAAGCCAAGAAGATCTCCAACAACTAATGGACCAAAGGAAACGCAAAAGATTGATATCAAATAGGGAATCAGCAAGAAGATCAAGAATGAGGAAGCAAAAACATTCTGATGATTTAACAGCTCAAGTAAATCAACTCAAGGAACAAAAAAATCAAATTGCAACAAATATTAACATTGTCACATATCTTTTCTTGAATGTGAAAGCGGAAAATTCAATTCTCAGAGCTCAATTGGTTGAGTTAAGCCACAGGCTGCAGTCCCTTAATGAGATGATAAGTTGCCCACACTCTCCATACCTCGAAAAATGTACTACTGTTGAAGGACCTGAAACGTACCCTGCAACCGTTATACAGGGTCCGAGCAACATA…	MASFSGTTSGSSQEDLQQLMDQRKRKRLISNRESARRSRMRKQKHSDDLTAQVNQLKEQKNQIATNINIVTYLFLNVKAENSILRAQLVELSHRLQSLNEMISCPHSPYLEKCTTVEGPETYPATVIQGPSNIAFNYHHDLDDFLNPWNLLNVNQPIMASSDSFSY*
173	Capsicum baccatum	CBAC_23	CB.CBv1.2.scaffold9.12		E	Chr04	111416650-111418606	ATGGAAAGTTTAAATGGTTCATCAAGTTTGAAAAACTTCTCCTTTTCGAACAAGCAGTTAATCATGGACTCCACTTCTCTCTTTCTCCAGTCCTACGAAGATTCAAATATGGATGGATCAAATTTAAAAGCAAAGTCAACAGAGGGATCGAGTCACCATCATCGGTGTAACTCTGAGAGCTTTCTTATAGAGGAGCAACCTTCTTGGCTTGATGACCTTTTGAATGAACCTGCAGAGACAACGACAGTTGTACACAAAGGTCATCGACGTTCAGCAAGTGACACTTTTGCATACGTAGGAGCAGCTGCAGAGAGGTTAAACACGAGTGAAGAAGCTAAAAATAAGAATGTAAATATAGGAGCTTCTTGGGGTTCAGTCAGCTATGTGAGTTACAAGGAT…	MESLNGSSSLKNFSFSNKQLIMDSTSLFLQSYEDSNMDGSNLKAKSTEGSSHHHRCNSESFLIEEQPSWLDDLLNEPAETTTVVHKGHRRSASDTFAYVGAAAERLNTSEEAKNKNVNIGASWGSVSYVSYKDLSAVPYDRRPNSSHEQKFNKAVQELNGAPSVSNEKHNMREINNSQNQEGSSERSNNAQAKHFMSKADAKRAKQQSAHRSRVRKLQHIAGLERTVHALQAEGSELSAELEFLNQQNIILSMENRALRQRLDSLSQEQLIKHLEQEMLERELTRLQTLYQMQRQQLQQRHQQPQQQNYCKHRRNKSRDLEAQCANLSIKNNEASSSRIQVAGSVRM*
174	Capsicum baccatum	CBAC_24	CB.CBv1.2.scaffold671.24		D	Chr04	181725060-181728291	ATGATCATGACTTCTCCAACAACTCAATTTGCCCCCACAAGAAGGATGGGCATATATGAACCATTTCACCAGATGAGTGTGTGGGAAGACGCGTTTAGAGGTGACATTGTGCCTAGTGTTGATGCATCTATGATTTCACAGCCAAACGACAGGCCAGATGACAAGTCGGGGTATACATCCGGTGAACAACATATACCCTCTGGCTCTGGAGACAATCAAGCACCAAGGAGGAGTATTTCAGAGAAGGTACAGCGACGTTTAGCACAAAATCGTGAAGCTGCCCGTAAAAGCCGTATGCGGAAAAAGGCGTATGTTCAGCAGCTGGAAACCAGCCGTTTAAAGCTGGCCCAACTCGAATTGGAGCTTGAGAGAGCTAGACAGCAGGGATTATACATGTTA…	MIMTSPTTQFAPTRRMGIYEPFHQMSVWEDAFRGDIVPSVDASMISQPNDRPDDKSGYTSGEQHIPSGSGDNQAPRRSISEKVQRRLAQNREAARKSRMRKKAYVQQLETSRLKLAQLELELERARQQGLYMLGSNSNMGILGTINPGIAAFEIEYSHWVEEQQKKNAELRSILQSPVSDMELQLLVENVLSHYFNLFRMKADAAKADVFYLMSGMWRTSVERFFLWIGGFKPSELINVVMPQLEPLSDQQIIKVCNLRHCCQQAEDALTQGMDKLHQTLAQSILNMNTGAGNYASQMVSSMENLEALESFVNQADHLRQQTLQQMSIILTTRQAARGLLAFGEYLQRLRALSSLWAARPREPT*
175	Capsicum baccatum	CBAC_25	CB.CBv1.2.scaffold1226.26		S	Chr04	206979891-206980316	ATGATGTTTGAAGATCCGGTTCACTACCATCTCCCGGTTCATGAAGATGTTGTTCTTTCACCTAGTGATATCGATGAAATATTATCTCTTTTACAAACCGAGCTCCCGGTTCATGAGTCTACATCCGGTTCAGAAACAACCCGGTTGGTCTTTTCCTTAGAAGAACGTAAGCGACGTCGAAAGATATCGAACCGGGAGTCAGCACGCCGGTCCAGATTCCGTCAGAAAAAACACGTAGATAATCTTACGGAACAAGTAGACCGGCTTAAAGTCGAGAACCGGGAGTTAAAAAACCGGTTATGTGTAGTTACTCATCATTGTCAAGCGGCTCAAAGTGAAACGGACCGGCTTATTCTCGAGTCAATTGTACTTCAACAACAACTAGCCGGTTTATGTCAA…	MMFEDPVHYHLPVHEDVVLSPSDIDEILSLLQTELPVHESTSGSETTRLVFSLEERKRRRKISNRESARRSRFRQKKHVDNLTEQVDRLKVENRELKNRLCVVTHHCQAAQSETDRLILESIVLQQQLAGLCQILNPMQLQ*
176	Capsicum baccatum	CBAC_26	CB.CBv1.2.scaffold1911.15		I	Chr04	213387409-213390765	ATGTCTCAGTCTAATTCTAAGCCACCTATGAGTAGCCATAATTTTGGTTTGGGAGGTTCGCATGTGAGGTCTTTATCTCAACCAGGGATTTTTTCGAATAGCTGTTTGCCCCCATTGAGTCCTTTGCCGCCTCCCAGTGAGTCGTCGATGGCGTTGGTTCAGTCTAGCTTGAAGGATACATCTATGGAGGAAGTAGATGTGAATTCCAAAGGTGTAGGAGTTGTGTCTTCCTTTACAAGGGATGGTCTTCCTCCGAGGAAGGGGCATCGTCGATCTAATAGTGATGTTCCATTGGGATTTTCGGCTATGATTCAGTCTTCACCTCAGTTGATGCCTATAGGTGTCCAGAAAGTTTTTGGGAGAGCAGTGAGTCTTGGGGATAGCTTGGGGAGGGATAAA…	MSQSNSKPPMSSHNFGLGGSHVRSLSQPGIFSNSCLPPLSPLPPPSESSMALVQSSLKDTSMEEVDVNSKGVGVVSSFTRDGLPPRKGHRRSNSDVPLGFSAMIQSSPQLMPIGVQKVFGRAVSLGDSLGRDKFTSRNGKIDGEEFGERKPKGEITDELLFSYMNLDNIDALNSSGTEDRDKDSMVSGTKVSGCDSSNNEAESVLKGNTVSIQPTGLREGSKRSADANIAPAARHFRSLSMDSAIGNFHYGDESPNLPNSLVMRSGQLSPSNSGNESSSKHNFDFGNAEFSEAEMKKIMADERLAEIAVSDPKRAKRILANRLSAARSKERKLRYISELEHKVQKLQSEATTLSTQVTILQKDLVEISSLNSELKFRIQSMEQQAQLRDALHESLTAEV…
177	Capsicum baccatum	CBAC_27	CB.CBv1.2.scaffold1010.16		St	Chr05	242770-250517	ATGGCTTCCTGCAAGGATGGTAAGTCAGTGATGGATAATGGAAAGTATGTCCGGTATACACCTGAGCAGGTTGAAGCACTTGAGAGGCTTTACCATGATTGTCCTAAACCAAGTTCCATGCGCCGTCAGCAGCTTATTCGAGAATGTCCTATTCTTTCTAACATCGAACCTAAGCAAATCAAAGTTTGGTTTCAGAATCGAAGATGCAGGGAGAAACAGAGGAAAGAGGCCTCAAGGCTTCAGACAGTGAATAGGAAGCTGACGGCAATGAACAAGCTATTAATGGAAGAAAATGACAGATTACAGAAACAAGTTTCTCAATTGGTGTATGAAAATGGCTACTTTCGCAGGCAAACTCACAGTACACCGCTTGCTACAAAAGATACCAGTTGTGAATCA…	MASCKDGKSVMDNGKYVRYTPEQVEALERLYHDCPKPSSMRRQQLIRECPILSNIEPKQIKVWFQNRRCREKQRKEASRLQTVNRKLTAMNKLLMEENDRLQKQVSQLVYENGYFRRQTHSTPLATKDTSCESVVTSGQHHLTSQHPPRDASPAGLLSIAEETLTEFLSKATGTAVEWVQMPGMKPGPDSIGIIAISHGCTGVAARACGLVGLEPTRVSEILKDRPSWFRDCRTVDVINVLPTANGGTIELLYMQLYAPTTLAPARDFWLLRYTTVMDDGSLVVCERSLGNTQNGPSMPPVPNFVRADILPSGYLIRPCEGGGSIIHIVDHMNLEAWSVPEVLRPLYESSAVLAQKTTVAALRYLRQIAQEVSQTNVTNWGRRPAALRALGQRLSRGFN…
178	Capsicum baccatum	CBAC_28	CB.CBv1.2.scaffold183.10		G	Chr05	173154703-173159368	ATGGGAAATAACGAGGACGGGAAATTTTGTATGCCTGAGAAATCATTTTCGACTGCTCCAGATCAAAGCAATATCCACGTGTCTCCTGACTGGGCTGCGATGCAGGATCAAAGCAATATCCACGTGTATCCTGACTGGGCTGCGATGCAGGCATATTATGGTCCTCGGTTAGCTATACCTCCATATGTTAATTCTGCTGTTGTGCCTGGTCATGCTCCTCATCCTTACATTTGGGGACCGCTACAGCCCATGATGCCACCTTATGGCACACCATATCTAGGAGTCTATGCACATGGTGGTGTATATCCGCACCCTGGAGTTCCTATAGTGTCTCATCCTCAGGCTCATGGAATGACATCATCTTCTGCTGTTAGTCAGACCATGGATACTGCTTCTTTG…	MGNNEDGKFCMPEKSFSTAPDQSNIHVSPDWAAMQDQSNIHVYPDWAAMQAYYGPRLAIPPYVNSAVVPGHAPHPYIWGPLQPMMPPYGTPYLGVYAHGGVYPHPGVPIVSHPQAHGMTSSSAVSQTMDTASLSMDASAECSGNTDQGLTSQLKGFNSLGMSIGNCSVDNIDGTDHGLSQRTLLNPVKDNEYRLIVTFMPCCAQTEGSSDGSNIHTAEVGENTRRRSRETTPNNCGDGKSRTLSSPQRTREVNGDSVKGTSVAVNPGNTAEELAGTVFSSTTLDLRNSVGTLMKPSPANVSAVPGDAWLQNERELKQEKRKQSNRESARRSRLRKQGRLKNILGQAEDGTLGKIDDEKLKPVSTADRLARVDNNDSFNRTTEDGDVHENNNTTGEKLHQ…
179	Capsicum baccatum	CBAC_29	CB.CBv1.2.scaffold1351.43		S	Chr06	4989587-4990021	ATGACTTTGACTCCACAATCCGTGAGTTCTGGTTCGGATGCTGATCCGAGGTATGCAAAGTTTGATGAAAGGAAAAGGAAGAGAATGGAATCCAACCGCCAGTCGGCCAAGAGGTCACGGATGAGGAAGCAGCAGCGTTTGGAGGAGTTAAAGAGCGAAACAACTCAGCTGCAGAACCAGAACAGTATCTGCCGCGATAAGATTGATTCTGTCGAAAGGAAGTATCATTCCGTTGACGCTGAGAACAACGTGTTGAGGGCTCAACTCGCAGAACTGACTGAACGGTTGAATTCGCTGAACGAACTCGCTCAATTCTGGGCTGATACTACTGGATTTCCTGTCGACGTTGCTGAAATTCCCGACATTTTGCTGGAGCCGTGGCAACTGCCGTGCCCAACT…	MTLTPQSVSSGSDADPRYAKFDERKRKRMESNRQSAKRSRMRKQQRLEELKSETTQLQNQNSICRDKIDSVERKYHSVDAENNVLRAQLAELTERLNSLNELAQFWADTTGFPVDVAEIPDILLEPWQLPCPTQAIAASDMFQF*
180	Capsicum baccatum	CBAC_30	CB.CBv1.2.scaffold390.2		I	Chr06	95699460-95713279	ATGCAAGATCCGTCAAATCTAAATTCCGTCAAGTTACCGAATCAACCGACGTCATTTTCAGAAGCATTCCGTCCATCTCACCACCGCCGAGCTCACTCCGAGGTGAACTTCCGGTTGCCGGAGGATCTAGATCTGGTCTCCGACCCATTCGATGTGCCGGCAGGAAGTTTCGAGGAGATGGGATCGGAGGATGATTTCTTCTCTACCTACATGGACATTGAGAAGCTCACCGGTGGATCTAACCTCGGCGATGCTACTGGTCTCGACAATGCTGGCGCAGGAGGGAGTCAAGTGGGAGCTGAGACTAGTGATGGGGAGAAGAGCATGATGAGGCCACGTCATAGGCATAGTAATTCTGTAGATAGCTCAAGTTTATTGCTCAGTGAGAGTATTGAAGCT…	MQDPSNLNSVKLPNQPTSFSEAFRPSHHRRAHSEVNFRLPEDLDLVSDPFDVPAGSFEEMGSEDDFFSTYMDIEKLTGGSNLGDATGLDNAGAGGSQVGAETSDGEKSMMRPRHRHSNSVDSSSLLLSESIEAKKAMAPDKLTELWTIDPKRAKRILANRQSAARSKERKARYISELERKVQTLQTEATTLSAQLTLIQRDTTGLTNENTELKLRLQAMEQQAQLRDALNEALKQEVERLKIATGQISASSDAYNSGMQQIPYNRPAFFPHQPQPGPSESQNIQMPQFHHIQGGMSNPRHPLHAGHAQALADAMQQDPLSRFQGLDISSSRGSHLVKTEAPSISASQSSSAF*
181	Capsicum baccatum	CBAC_31	CB.CBv1.2.scaffold659.2		I	Chr06	108899067-108904364	ATGCAAGATCCGTCAAATCCAAACTCGATGCAACTGAATCAAACGCCGTCACTTTCCGCTACATTCAGGCCATCTCACCACCGCAGAGCTCACTCGGAGGTTAACTTCCGTCTGCCCGAGGATCTAGATCTGGTATCTGACCCATTCGATGCCTCCGCCGCAAGTTTTGAGGAGATCGGATCTGAGGATGATTTCTTCTCCACTTACATGGACATTGAAAAACTCGGCACTGGATCTAACCCTACTGATTTTCCAGGATTCAACAATGCTGCTGCTGGAAGTAGTGGTGGACTGGTGGTTGACTGTGGTGATGGAGAGAAGAGTTTTACTAGGCCTCGTCACAGGCATAGCAATTCCGTGGATAGTTCGAGCTTGTTGTTAAGTGAGAGTATTGAAGCT…	MQDPSNPNSMQLNQTPSLSATFRPSHHRRAHSEVNFRLPEDLDLVSDPFDASAASFEEIGSEDDFFSTYMDIEKLGTGSNPTDFPGFNNAAAGSSGGLVVDCGDGEKSFTRPRHRHSNSVDSSSLLLSESIEAKKAMAPDKLAELWTIDPKRAKRILANRQSASRSKERKARYITELERKVQTLQTEATTLSAQLTLFQRDTTQFTNENTELKLRLQAMAQQAQLRDALNEALKQEVERLKMATGELSSSDAYNLGMQHIPYNQSAFFSHQLQSGPNESQNIQMQQFHSLQDSLLAPHRRLPAGHVQALPDTIQQDPLGRFQGLEIGGRGMHLVKTEAPSISASESSSTL*
182	Capsicum baccatum	CBAC_32	CB.CBv1.2.scaffold986.3		I	Chr06	142074915-142086536	ATGGATAAGGATAAGTCTTCGTTGCCTCCATCGGGGAGATACTCATTATTTTCACATCCTGGTAGTAGTTCCAATGTAAAGTCGGAACCACCTGGATTAGTAAATTTACCTCCCTTAGGACCTGGAAATGCTTCAGAATCGGGTCACTGTGGTCATGGTTTGTCGGTGGAGTCAAGCCTATTTAGTAATGATATAAGCCGAATGTCTGATAACCCACCTAGAAAATTTGGTCACCGACGTGCCCACTCAGAAATTCTTACTCTTCCTGATGATATTAGCTTTGATAGTGATCTTGGTGTTGTTGGACTAGATGGACCGTCTCTGTCAGACGAGACTGAGGAAGACATCTTCTCAATGTACCTTGACATGGATAAGTTCAATTCTTCATCGTTGTCTTCT…	MDKDKSSLPPSGRYSLFSHPGSSSNVKSEPPGLVNLPPLGPGNASESGHCGHGLSVESSLFSNDISRMSDNPPRKFGHRRAHSEILTLPDDISFDSDLGVVGLDGPSLSDETEEDIFSMYLDMDKFNSSSLSSDFQVGESSSAAAASGSSQTQGMTSGTNKVAPTVSEKPRVRHQHSQSMDGSTTIKPEMLMSGVEEPSSAETKKAASAAKLAELALIDPKRAKRIWANRQSAARSKERKMRYIAELERKVQTLQTEATTLSAQLTLLQRDTSGLTAENSELKLRLQTMEQQVHLQDALNDALKEEIQHLKVLTGQGMANGGPMMNFPASFAGNQQFYSNNQAMHTLLAAQQLQQLQIHSHKQQHQFQQHQLHQFQQQQQQLQHQQQQPLIQQQEPLSQ…
183	Capsicum baccatum	CBAC_33	CB.CBv1.2.scaffold346.10		I	Chr06	193932041-193939033	ATGGACCCTAAGTTCGCCGGAAAGCCCATTCAGGCCCAATTCTATTCGGGTCAAACTGACCTGGACCAGATGCAAGACACTCCAACACGAGCCCGGCACCGCCGTGCCCAATCGGAAACCTTCTTCCGTTTCCCCAGCTTCGACGATGACATGCTTTTAGACGATGTCGTTTCCGACTTCAGCCTCGATGCTGTTCGAGCTCCTACACTCATGCAACCTGCGAATTCACCCGATTCTTCCTCCACTGGACCGGGTGATAACCCTAATAAACCGCTATCTCATTATCGGAGTTTATCTGTTGATGCTGATTTTTTTGACGGACTGGATTTTGGTCCTGCCTCAATTGAGAAGAAGATGGTGATGGGTTCTGGACCGCGTCATGGACATAGCAATTCCATG…	MDPKFAGKPIQAQFYSGQTDLDQMQDTPTRARHRRAQSETFFRFPSFDDDMLLDDVVSDFSLDAVRAPTLMQPANSPDSSSTGPGDNPNKPLSHYRSLSVDADFFDGLDFGPASIEKKMVMGSGPRHGHSNSMDGSFDTTSFESESVSVKKAMAPDKLAELSLIDPKRAKRILANRQSAARSKERKNRYTSELERKVQTLQTEATTLSAQITVLQRDTFGLNAENKELKLRLQALEQQAHLRDALNETLREELQRLKIEAGQIPAANGNRGTRPHLPPHPQSFAQCGNHHAQQQQIPRPTTSNQTVPGQSPNSFFNFNRA*
184	Capsicum baccatum	CBAC_34	CB.CBv1.2.scaffold1369.4		M	Chr06	251827468-251829549	ATGAAAGACGAACAAAAAAGATCTGATGAGCTCAACTTGAATTTGAGCCTCACAACTCCCGGAGAAGCTGAATCAGTTGATAAGATTCAAACTCTGAATGAAGCAATGGCTTTTGAACTCAAGCACCATGAAGACCTCAGTCTTGCTGATGAGAAGAAGTTGAGAAGGAGAATATCAAATAAATTGGCTGCTCGAAGAAGTAGGTTCAGGAAGCTCACTCACAAAAACAAATTGGAACAAAACTTCAAAGATCTTCAGGATGAAATAGCTCTGGTGGGATCAAAAATAGAAAATATGAAAAATTATAATGATAAGTTGCGGGTGGAGAATGAAATGTTGCGAGAACGATTAAATAACATCACTGACAAAGCCACTCAAGCAACTGCAAAAATTGAAGAA…	MKDEQKRSDELNLNLSLTTPGEAESVDKIQTLNEAMAFELKHHEDLSLADEKKLRRRISNKLAARRSRFRKLTHKNKLEQNFKDLQDEIALVGSKIENMKNYNDKLRVENEMLRERLNNITDKATQATAKIEEVKLELQLLKMNLAKAQEYQHYMKIGGESFDFYNHDELESAPEIDINQYLNLDDDM*
185	Capsicum baccatum	CBAC_35	CB.CBv1.2.scaffold1369.3		M	Chr06	251843132-251845603	ATGAAGAGAAAACAAAACAAATCTGAAGAACCTAATTTGGATTTGTGCCTTGCAACGCCAGCTGCAGTTGATCCAATTATCAAGATTCCTACCCTTGAAGAAGCAGTGAATTCTGAACTTTGCCAAGGTCATGGAGACCCCAATGTTGATGTGCAAAAGTTGAGAAGACTAGCTGCACAAAGATCCCGAGCCAAGAAGGTTGAATACACTGCTAATTTAGAAAAGAAGGTCAAAACTCTCCAGGCTCAAGAAGAAGAGCATATGAAGGGAGAAATTTTCAACTTCTATAATTATGATGAAGCAGAATCAGCTGAAGAGGTAGACATGAACAACAACATTAATACAGACCAGTATGTCAACTTTGATGACATGAACGTCGACCCACCCAAGAATGACATG…	MKRKQNKSEEPNLDLCLATPAAVDPIIKIPTLEEAVNSELCQGHGDPNVDVQKLRRLAAQRSRAKKVEYTANLEKKVKTLQAQEEEHMKGEIFNFYNYDEAESAEEVDMNNNINTDQYVNFDDMNVDPPKNDM*
186	Capsicum baccatum	CBAC_36	CBAC_bZIP.Chr06.1		M	Chr06	251872916-251875513	ATGAAGAGAAAACAAAACAAATCTGAAGAACCTAACTTGGATTTGTGCCTCATAACGCCAGCTGCAGTTGATCCAATTAACAAGATTTCTACACTTGAAGAAGCAGAAAAATCTGAACTTAGCCAAGGTCATGGAGACCCCAATGTTGATGTGAAGAAGTTGAGAAGAACTATAGCAAAAAAACTAGCTGGACAAAGATCCCGAGCCAAGAAGGTTGAATACATTGCTAATTTAGAAAAGAAGGTCAAAGCTCTCCAGAATAGGATAGATGTGAAGACAATAGAAGAAGTATATATGAAAGACTATAATGAACATTTGCAGATGGAGAATGAAATGTTGCGAAAACGAGTGGATAGCGTTACTGACTATATCAATCGACAATCTGTACAAACTGAAGAG…	MKRKQNKSEEPNLDLCLITPAAVDPINKISTLEEAEKSELSQGHGDPNVDVKKLRRTIAKKLAGQRSRAKKVEYIANLEKKVKALQNRIDVKTIEEVYMKDYNEHLQMENEMLRKRVDSVTDYINRQSVQTEELKLELKRLKLAKAQEE
187	Capsicum baccatum	CBAC_37	CBAC_bZIP.Chr06.2		M	Chr06	251981135-252052121	ATGAAGAGAAAACAAAACAAATCTGAAGAACCTAACTTGGATTTGTGCCTCAGAACGCCAACTGCAGTTGATCCAATTAACAAGACTTCTACCCTCGATGAAGCAGTGAATTCTGAACTTAGCCAAAGTCATGGAAACCCTAATGTTGATGTGAAGAAATTGAGAAGAACTATATCAAACAGACTATCGGCACGAAGATTCAAGACAAGACAGGTTGAACACACAATCGATTTAGAAAAGAAGGTTAAAGATCTTCAGAACACAATAGCTTTTGTGGTGCCAGAAATAGAATATATGAAAGACTATTCAATGAAGTTGCAAGAGGAGAATGAAATGTTGCAAAGACAATTGGATAGTGTCACTGACAACGCCAATCAACGATGTGCGCAAATTGAAGAG…	MKRKQNKSEEPNLDLCLRTPTAVDPINKTSTLDEAVNSELSQSHGNPNVDVKKLRRTISNRLSARRFKTRQVEHTIDLEKKVKDLQNTIAFVVPEIEYMKDYSMKLQEENEMLQRQLDSVTDNANQRCAQIEELKVELKRLEKLVNAQEE
188	Capsicum baccatum	CBAC_38	CB.CBv1.2.scaffold178.56		E	Chr07	230297097-230299953	ATGGCACATTTACCTCCTAGAGTGCCAATGCCACAAAATTGGCCTGATTTTTCAGCACACCAAAAAACCGAAACAATCACCACTGCTAGTCATCACCATAACCCGTCATGGGTAGACGAATTCCTCGACTTCTCCTCATCAAAACGAGGGTCTCATAGGAGATCCATAAGCGATTCCATCGCGTTCCTTGAAGCACCAATGGTCGAAGAATGCCGAATCAGGCTATCAAGTTCGGGCGCGCCTGAATTCGAGCGATTTGATGATGAACAACTTATGTCTATGTTTAACGATGATATTAATGCTGTAGAAAACAACTCTAATCCTTCGTCTCCTTCAGATCATAACAGCATTGTTCACGAAGATAAGAAAATGCAGTTGTCTACGGACGAGCAGCAGCAG…	MAHLPPRVPMPQNWPDFSAHQKTETITTASHHHNPSWVDEFLDFSSSKRGSHRRSISDSIAFLEAPMVEECRIRLSSSGAPEFERFDDEQLMSMFNDDINAVENNSNPSSPSDHNSIVHEDKKMQLSTDEQQQKQQLLKVEPEEVESSCKSDNEQTAADQHVNVDTSSEKIVDPKRIKRILANRQSAQRSRVRKLQYISELERSVTTLQAEVSVLSPRVAFLDHQRLVLNVDNSVLKQRIAALAQDKIFKDAHQEALKREIERLREIYYQQNLKKLENDDDDQPTKTQTAAAADANGSEKKEQLVN*
189	Capsicum baccatum	CBAC_39	CB.CBv1.2.scaffold307.80		E	Chr07	241644553-241647793	ATGGCTCAACTACCACCTAAAGTTCCCACCATGGCACATAATTGGCCATTCCAAAACATGCCCCCATTGCCTAATTCTACGACCATCACTATCAACCACCATACTAACAATAATTCCTGGGTCGATGATTTTCTAGATTTCTCGTCGGCCCGGAGGAATTCGCACCGTAGATCAGTTAGCGACCCGATTGCATTCGTGGAGGGTCCGTTTCTCCAACAATGCCGGGTCGCTGGATCGAATATCGGGTTCGATAAATTAGACGATGAACAACTTACTACAATGTTTTCTGATGAATTAGCCAACAATGCACCCACAAGTACGAATTCATCTACACCGTCAGATCAAGTAAGTGAAAATGACGATCAGAAATCAACGGTCCTACCAACAGTTGATGTTAAT…	MAQLPPKVPTMAHNWPFQNMPPLPNSTTITINHHTNNNSWVDDFLDFSSARRNSHRRSVSDPIAFVEGPFLQQCRVAGSNIGFDKLDDEQLTTMFSDELANNAPTSTNSSTPSDQVSENDDQKSTVLPTVDVNQVVVQPKDEPGEVDDSDNNNNQLSPSANKNAANDNSDNTNCIVDPKRIKRILANRQSAQRSRVRKLHYISELERSVTTLQTEVSALSPRVAFLDHQRLLLNVDNSALRQRIAALAQDKIFKDAHQEALKKEIERLRQIYHEQNMKKISTTATADAPPSAVAPMSCTEEA*
190	Capsicum baccatum	CBAC_40	CB.CBv1.2.scaffold436.17		C	Chr08	29664989-29673445	ATGGAGAAGAAAATGGCTAATTTTGCTAGTAGAAACATGAAGAAAAGTCCTTCTATATTGGCTATGGAAGAAATTTATGGACAAGATGCAAAAATTAGTGATGGTTTTGGAGCAAGTGATCATCATCAACAACAAAGTACCAATAATAATAATAACATTAATCATCATGACGAGAACAACAATAACAACAACAATGGTCATCATCATGCTCAACTTTTTGGTGATATTTGTTCTATTGATCCCTCATTTACTATGAGAAATCAGGACATATTAAATGGTTTCTCAAATTGTGGAATGACAGAAAGGCCCCTTTGGTCTCCAAATATTACTCCCAAGCAATCCACTATATCTGTTACTGTGGATTCACAATCTTCAATATGTGCTGGGAGTCCAACACCA…	MEKKMANFASRNMKKSPSILAMEEIYGQDAKISDGFGASDHHQQQSTNNNNNINHHDENNNNNNNGHHHAQLFGDICSIDPSFTMRNQDILNGFSNCGMTERPLWSPNITPKQSTISVTVDSQSSICAGSPTPTIIMPPKARDNQTMGANSGSYQSDDDDVDGEVGPCEQSTDPLDIKRIRRQASNRESARRSRRRKQAHMADLENQVDQFRGENESLFKQLADATQQYKDALTNNRVLKSDVEALRAKVKLAEDMVARGSLTSSLSHLLQNYLNTPQSLGTTTTTNNNNTMCRLDNVSPTITVPGEDSWGVISSQNSMIGVDNNNVNAFNQNGAMSDTVSCVSDVWSWE*
191	Capsicum baccatum	CBAC_41	CB.CBv1.2.scaffold55.6		H	Chr08	89771783-89786229	ATGCAAGAGCAAGCGACAAGTTCCATTGCGGCTAGTTCTTTACCTTCAAGTAGTGAGAGATCTTCTAGCTCAGCTCTCCATCTTGAACTCAAAGAAGGCATGGAGAGTGATGATGAGATCAGAAGAGTGCCGGAGATGGGTGGAGAAGCCACCGGAACCACCTCAGCTTCTGGCAGAGATGGAACTTCCGCCGCCGGTCAAGCTCAACCATCAGCTGGGACTCAAAGGAAGAGAGGAAGAAGCCCTGCTGACAAAGAAAACAAGAGGTTAAAAAGGTTGCTGAGAAATAGAGTATCGGCACAGCAAGCAAGGGAGAGGAAGAAAGCATACTTGATAGATCTGGAAGCAAGGGTGAAGGAATTGGAAACTAAGAATGCAGAACTTGAAGAGAGGTTGTCC…	MQEQATSSIAASSLPSSSERSSSSALHLELKEGMESDDEIRRVPEMGGEATGTTSASGRDGTSAAGQAQPSAGTQRKRGRSPADKENKRLKRLLRNRVSAQQARERKKAYLIDLEARVKELETKNAELEERLSTLQNENQMLRHILKNTTAGAQEGRK*
192	Capsicum baccatum	CBAC_42	CB.CBv1.2.scaffold726.19		G	Chr08	182078529-182082116	ATGGGAAACAGTGAGGATGGGAAATCCTGTAAGCTTGAGAAACCCTCTTCCCCTACACCGGACCAGAGCAATCTCCATGTCTATCCTGATTGGGCGGCCATGCAGGCATATTATGGTCCTCGAGTAGCTGTACCTGCATATTTCAATTCAGCTGTTGCACCTGGTCATACCCCCCATCCTTATATGTGGGGGCCACAGCCTATGATACCACCTTATGGCACCCCTTATGCAGCACTATATGCTCATGGTGGTGTTTATGCGCATCCTGGAGTCCCAATTGGATCTCATCCTCCTCCTAGTCATGGTATGGCAACATCTCCTGCTGTCAGCCAGGCCATGGATGGTGCTTCTTTGAGTTTAGATGCTTCTGCTAAGTCCTCAGGGAATTCTGAGCGAGGC…	MGNSEDGKSCKLEKPSSPTPDQSNLHVYPDWAAMQAYYGPRVAVPAYFNSAVAPGHTPHPYMWGPQPMIPPYGTPYAALYAHGGVYAHPGVPIGSHPPPSHGMATSPAVSQAMDGASLSLDASAKSSGNSERGLMKKLKEFEGLAMSLGNGSADNVEGGTDNGHSQSGETEGSTDGSNTNGVGVSERSKKRSCETTPDNSGDDKSHSRRCQPSGEVSNDAEKAIVAVSPGKVAEKVTGTVLSPSMTTLEMRNPASAHMKASPTNGSPLSPALPNEAWLQNERELKREKRKQSNRESARRSRLRKQAEAEELAVRVQSLTAENMTLKSEINKLIENSEKLKLDNAALMERLKNEQLGQTEEVSLGRIDDKRLQPVGTVNLLARVNNSGSSDRTNEEGEVY…
193	Capsicum baccatum	CBAC_43	CB.CBv1.2.scaffold108.55		C	Chr08	186019838-186027324	ATGGATAGGGTATTTTCAGTGGACGATGACATTGGCGACCATTTTTGGTCTACGCCGCCGTCGACGGCGGAGTTAGGCGTTGATTCACCTACCTCCGCCGCCGCCAACTCCTACTCTAAGATGATGAATCGGAGCTCCTCCGAATGGGCTTTCCAGCGCTTCTTACAAGAAGCCACCGCCGCTTCTCCTCCTCAGCCACCTACAATGGCGTCTTCATCATCATCGTCGCATCAAAACGACGTCGTCGAGATCAAGGATGAGAGTCTATCTTCTGCTGCTAATCGCAATTCCAGTACGGCGTTGAATTTGAAGCCGGCGACGTCGTTTGTATCTGGACCTCCGCAGAATATTCCTGTTGATTCTGAAGAGTATCAAGCTTTCCTCAAAAATCGCCTTGAT…	MDRVFSVDDDIGDHFWSTPPSTAELGVDSPTSAAANSYSKMMNRSSSEWAFQRFLQEATAASPPQPPTMASSSSSSHQNDVVEIKDESLSSAANRNSSTALNLKPATSFVSGPPQNIPVDSEEYQAFLKNRLDLACAAVALSRAKNLKPQNSSSTAPDKGSETAGASQSVSHIGIKGSGQELTNIQDKDSGGPVGIPSLPPVQKKPGVQVKSTTSGSSRDQSDDDEAEGEAETTQGTDPADVKRVRRMLSNRESARRSRRRKQAHLTELETQVSQLRVENSSLLKRLTDISQKYNESAVDNRVLKADVETLRAKVKMAEETVKRVTGLQPLFQAMSDVTSMAMPSFSGSPSDTSADAAVPVSNDPKHHYYQQPPNNHMPTHDPRIQNGMVDVPPIGNVQ…
194	Capsicum baccatum	CBAC_44	CB.CBv1.2.scaffold1021.27		A	Chr08	199281062-199285173	ATGGCGTCAAAGGTGATGTTGTCAGCATCAACAACAACGCCTAATTCGGATCCTTCTTCTTCTTCTCTTCATCCCCACCCTATTACTTCTTCTTCTTCTTCTTTACATCATCAACTTCACTCTCATCCTTCTACGAACTTCGGTTCTATGAACATGGATGAAATTCTTCATAACATGTATTCTGATTCTGACCCTTTTGCTTCTGACCCCACCGCCACCGATGCTGCCGCTGTTAATCCTGTTTCCGGTGGTGGGGATGTGGGGCCCAGTAAGACTGTGGATGAGGTGTGGAGGGAGATTGTAGCAGCGGGTGGGGGTGGGAGTAGGGAGCCGGAGATGACTCTGGAGGATTTCCTGACGAAAGCTGGTGCGGTTACAGAGGAGGATGTTAGAGTTCCG…	MASKVMLSASTTTPNSDPSSSSLHPHPITSSSSSLHHQLHSHPSTNFGSMNMDEILHNMYSDSDPFASDPTATDAAAVNPVSGGGDVGPSKTVDEVWREIVAAGGGGSREPEMTLEDFLTKAGAVTEEDVRVPVIAPHPPPPPPPPPPSSSTEVLAPAIGGGFVVDNMMGTGNCQFAVAMQQNGPGGYGMEPPPPPHMGYANGVVAAISGSGRGKRRSTVEELPADKATQQKQRRMIKNRESAARSRERKQAYTVELESLVTQLEEENARLLREEEEKNKERLKQIMENLIPVVEKRRPPRILRRVRSMSW*
195	Capsicum baccatum	CBAC_45	CB.CBv1.2.scaffold411.76		F	Chr08	205361131-205364234	ATGGCTGACGGGGAGCTGGAAATTTCTAACCAAGAAATGTTATCAAGTTCGAATTTTGGTGAATTTAGTAGCTCCATGGACAGCTTTTTCAATGAGATACTCAAGGATGCGCATGCTTGTACTCATGCTCACACTTGTAACCCGCCCGGTCCTGATAACTCCCATACCCATACTTGCTACCATGTTCACACCAAAATAGTGCCTACCTCGGAAGACGATAAGAACCCCAGCGATGATACTGCAGAGTCTGCGGAGAATAAAGGGAAGAAACGCCCGGCGGGTAATAAGGAAGCTGTTCGTAAGTATCGTGAGAAAAAGAAGGCTCGGGCTGCTTCATTAGAGGATGAAGTTGTGAGATTGAGAGCTATAAATCAACAGCTGTTGAAGAGGCTGCAGGGT…	MADGELEISNQEMLSSSNFGEFSSSMDSFFNEILKDAHACTHAHTCNPPGPDNSHTHTCYHVHTKIVPTSEDDKNPSDDTAESAENKGKKRPAGNKEAVRKYREKKKARAASLEDEVVRLRAINQQLLKRLQGQAVLEAEVARLKCLLVDIRGRIEGEIGSFPYQKPMKNGNAYQQIVNPSFPGAYVVNSCNLQCDDQLYCLHPGAEGKSSDGTVVNGQGFNNCEFETLQCFGNQTSELEEVPGCTVGSSTPTANTGRSKRRGGTRATTAS*
196	Capsicum baccatum	CBAC_46	CB.CBv1.2.scaffold353.102		A	Chr08	208318211-208320261	ATGGGATCTTACATGAACTTCAAGAACATTGCTGACACACCACAGCCAGAGAGCAACACGGGGAAGTCAATGGGTAATGGTGATCTCCCTTTGGCTAGGCAATCTTCCATATACTCGTTGACGTTTGATGAGCTTCAAACTACATTTAGTGGACTTGGAAAAGATTTTGGATCAATAAATATGGAGGACCTGTTGAAAAGCATTTGGTCAGCTGAAGAGTCTCAAGCTGTGGCATCGTCTAATGGTGGAGGAGATGATGGGAATGGGAATCTACAGAGGCAAGGTTCTTTCACACTACCTCGGCCACTTAGGCAGAAAAGTGTTGATGAAGTATGGAGAAACTTTCAGAAAGAAACCGTTGGTACCAAAGATGAAAGTGCCTCTGAGAAATCAAGCTTT…	MGSYMNFKNIADTPQPESNTGKSMGNGDLPLARQSSIYSLTFDELQTTFSGLGKDFGSINMEDLLKSIWSAEESQAVASSNGGGDDGNGNLQRQGSFTLPRPLRQKSVDEVWRNFQKETVGTKDESASEKSSFGQRQSTLGEMTLEEFLVKAGVVREDMQSNSNSIGITYNDGLSQQNNNSLNIAFQQPTQDTGLLINQMVANNMLNVVGATASQQQPQQQQRPLFPKQTTVAFASPMQLSNNGNLASPRTRAPAVGMSSPSVNTNNIAQGGVMGMGEFHSGVSPAKGGSPGNDFTSRSNVDTSSLSPSPYAFNEGGRGRRSGSSLEKVVERRRRRMIKNRESAARSRARKQAYTLELEAEVAKLKEINEELRKKQAEIIEKQKNQLLDKRSMPCGYKL…
197	Capsicum baccatum	CBAC_47	CB.CBv1.2.scaffold403.39		J	Chr09	701947-709008	ATGGACAAAGACTTTAAACCGCCATACAAGGAGGCTCAAGGTGGTGAAGATGAATTGGTTGAGTGTGAAATGGAAGCAGCACAAGCATTGGCTTGTTTGGCTCAACCACTTATTAGTAATAATAATAATAATGATGAGTTTTTAGTTGCTGGATCATCTGGTTGTTGTGAGGAGCAAGCAATCGAGGGACAGTCCGAGCAGGAATCTGAACCCAAAACAAACCCTCGACATACTCTTAACTGTCCACCAGCTACCAGCAGAAGATCGAGGCAGAATTTGACCGAGGAGGAGAAGGAACAACGAAGACTCAGTCGTGTGTTGGCAAATAGAGAGTCTGCTAGACAGACGATTCGCCGGAGACAGGCCATGTACGAAGAATTGACAAGAAAAGCAGCTGAT…	MDKDFKPPYKEAQGGEDELVECEMEAAQALACLAQPLISNNNNNDEFLVAGSSGCCEEQAIEGQSEQESEPKTNPRHTLNCPPATSRRSRQNLTEEEKEQRRLSRVLANRESARQTIRRRQAMYEELTRKAADLASENESLKKKKEMAAKEYDSLKNQNAGLRLQIAKAEKAEGEETDGASTSKPVHISTTRTGPAPYPTPTPAPMPPLFWPSLVQPFNSFVLQCNTPNVSGITSVLSSSTAGESNSITNPGNPFYVLPVPCLIPFNPQNSPVFPWSATLDKHPETSGVHHCDTSYPNMENNPAATAQERETDAPDSVQATQNRQPGTSRQSDTRHRQHNTPDINAAVSFTAGQVGDTSEKTTCQESITCPSDKSADAVAAAAEARRRRKELLHLKGHH…
198	Capsicum baccatum	CBAC_48	CB.CBv1.2.scaffold403.60		A	Chr09	1215317-1217454	ATGGGAGTAACAGAATCAGAGATGGTGTCACAAGGTGAAGTTCAATCACCATTGCAACAAGACCAAAACCAGCATAAGAATCAACTGTTTTCGTCGCTTGGTAGACAAGCGTCGATCTACTCCCTCACGCTGGACGAGTTCCAACACACCCTTTGTGAGAGTGGGAAGAATTTCGGGTCGATGAACATGGATGAGTTCCTTAATAGCATTTGGACTGCCGAAGAAAACCAAGCGCATGCTCACGCTCACGCCCATCCTCACAGCCAGAGTGTAAGTGCCGGGGAAGCCACTAGCGCGGCGCCACATTTTGCGTTGGGACAAGGCAATGTTTCGATGGATAAGGGTATTGTCAAGCAGCAGAGCTTGCCGAGACAGGGATCACTTTCTCTTCCTGAACCG…	MGVTESEMVSQGEVQSPLQQDQNQHKNQLFSSLGRQASIYSLTLDEFQHTLCESGKNFGSMNMDEFLNSIWTAEENQAHAHAHAHPHSQSVSAGEATSAAPHFALGQGNVSMDKGIVKQQSLPRQGSLSLPEPLCRKTVDEVWSEIHKNQQQQQQNNGGSLPNTSNSCSTQRQATFGEMTLEDFLVKAGVVREQGNAAAPVPTQQQSYTMYQNSTAPTMGAMARPVIGLSGVTAGVGVGVGIPGYPQLPQSGVVEAPLYPISMKRGSGFPQQPTPVYGGRIGNGSGVGYGQVQGVAGMGSPLSPVSSDGLCVNQLDSGGQYGLEMGMRGGRKRAIDGPVEKVVERRQRRMIKNRESAARSRARKQAYTVELEAELNQLKEENAHLKQALADLERKRKQQ…
199	Capsicum baccatum	CBAC_49	CB.CBv1.2.scaffold1857.3		S	Chr09	196751343-196751834	ATGGCTACTTCGAGTGGAAATTCATCTCAAATTCAGACTAATTCAGGTTCCGAAGAGGTGTTAATGGTGGTTGATGAGAGGAAGAGAAAGAGAATGCAATCGAATCGCGAATCAGCAAGGAGATCAAGAATGAGAAAACAAAAGCATCTTGATGATTTAAATGGTCAAGTAACACAACTCAAGAATGAAAACAGTAACATCCTCAACAGCATCAATGTTACAACACAACAGTATTCTAATGTTGAGGCTGAGAATTCTGTCTTAAGAGCACAAATGATGGAGTTAACTCAAAGGTTGCAATCTCTTAATGAAATCCTTAATTACATCGACAACAATAATAATAACAACAACAACATTAATAATAATAATAATAATAATGGGGGTTTTGAGATTAATAAT…	MATSSGNSSQIQTNSGSEEVLMVVDERKRKRMQSNRESARRSRMRKQKHLDDLNGQVTQLKNENSNILNSINVTTQQYSNVEAENSVLRAQMMELTQRLQSLNEILNYIDNNNNNNNNINNNNNNNGGFEINNYHQDDFQINPWNMMYVNQPIMASADMLYQY*
200	Capsicum baccatum	CBAC_50	CBAC_bZIP.Chr10.1		I	Chr10	34640935-34643000	ATGTTGTCCCTCATGCATGAAGTAAAGGGAAGGATTTTGGCGAATCGGCAGTCTGCTTCTCGCTCGAAAGAGAGGAAAGCCCGTTACATAACTGAACTTGAGAGAAAGGTTCAGACCCTTCAAACAGAAGCAACCACTCTTTCTGCTCAATTAACCCTTTTCCAGCGGGATACGACCCAGTTTACTAATGAGAATACAGAGCTTAAGCTACGTCTGCAAGCTATGGCACAACAAGCTCAGGTACGAGAAATTGACTTTCAAAGTGATCCATGGCCATCCATATCAAATAGTGCCAAGGACCTTATTCGGAAAATGCTAACACAAGAGCCAAAGAAGAGAATTACTTCAGTGCAAGTTCTTGGTATTTCTCCTGTTTCCCTTTGTAATCAAAAGTTACAG…	MLSLMHEVKGRILANRQSASRSKERKARYITELERKVQTLQTEATTLSAQLTLFQRDTTQFTNENTELKLRLQAMAQQAQVREIDFQSDPWPSISNSAKDLIRKMLTQEPKKRITSVQVLGISPVSLCNQKLQ*
201	Capsicum baccatum	CBAC_51	CB.CBv1.2.scaffold724.7		D	Chr10	222157253-222166975	ATGTCTGAATTTGGGGTGCTTGAGCAATATCTTGGATTCCGTATTGGAGATGGTTCTAATGCTAATCGAAGTCCCCTATTTAATTCAACATCTGCAACTAATCCAGCAGTGGGCTTTGACGTCTCTGGAACCATCAATAGGAATTTAGCTCCTTCAAATACAAGTTTGTCTGCTGCTGCTCCGGGATCTCAGATATTACAATTGCAATCAAGTGTAGTTCCTGTATCCTCTCATCCTGAGAATTGGGGTGAGTCCAACTTGGCCGATTCTGGTTCTCGCACTGATACTTCAACTGACATGGATGGAGATGATAGAAATCAACGGATTGAGACAGGTCAATCCAGGACTATTGCAGCTTCTGATTCCAGTGACAAATCAAAAGAAAAAGTGTTGGATCAG…	MSEFGVLEQYLGFRIGDGSNANRSPLFNSTSATNPAVGFDVSGTINRNLAPSNTSLSAAAPGSQILQLQSSVVPVSSHPENWGESNLADSGSRTDTSTDMDGDDRNQRIETGQSRTIAASDSSDKSKEKVLDQKTLRRLAQNREAARKSRLRKKAYVQQLENSRLKLSQLEQDLQRARQQGKYISNMGDQSNGVGASGTLAFDAEYSRWLEEHNKHINELRNAVNSHASDPELRSIVNNVTAHFDEVFRVKGNAAKADVFHVLSGMWKTPAERCFMWIGGFRPSELLKLLVTQLEPLTEQQLAGIYNLQQSSHQAEDALSQGMEQLQQSLAETLANGSPATE
202	Capsicum baccatum	CBAC_52	CB.CBv1.2.scaffold724.61		D	Chr10	223049501-223057414	ATGGATTCCACTAACAATAATATTTCTTTCATCAACCACCATCAGTTTTTTCATAATATTCCTCAGCAGCAGCAGCAGCAACAACAACAAATGGAAAATAATAATAATCATCATCATCAGATATCTTTTGGATTATTTCAACAGTCACCTTCTTCATCATCTGCTAATCCTGATGAAAACTTCATAAGCAAAGAGAATGGTGGAGCTTATGATTTAGGTGAACTAGATCAAGCACTTTTTCTTTATCTTGATGGACAAGATCATCCTTCTTCATCAATCCAAGATCAAAGACAGAATAATTATGGGATGAGGCCACCAACTCTCAACATTTTTCCATCACAGCCAATGCATATCGAGCCATCTTCAACTAAGGAAACTATTGGATTAGTTTCTCAATCT…	MDSTNNNISFINHHQFFHNIPQQQQQQQQQMENNNNHHHQISFGLFQQSPSSSSANPDENFISKENGGAYDLGELDQALFLYLDGQDHPSSSIQDQRQNNYGMRPPTLNIFPSQPMHIEPSSTKETIGLVSQSTTSGSKKTSQPSMDKTEPPPKVPKREGSGKSPTSSQEQDAPKTPDPKTLRRLAQNREAARKSRLRKKAYVQQLETSRIRLAQLEHEIQRARSQGFHVGGNVLHGGDQGFQINRTNISSDAAAFNLEYARWLEEHHKLLCELRNAIFEEQLQEDELRIYVENCVAHYDNMMNLKGILAKSDVFHLVSGLWKSPAERCFLWIGDFRPSELLKIIVNQIDALTENQVLGLCALQQSTQEAEDVLSQGLEALNQSVSDTIIASDALIMGN…
203	Capsicum baccatum	CBAC_53	CB.CBv1.2.scaffold1239.36		A	Chr10	225114921-225117151	ATGGTGGTGACTCGTGGGATGGGCTCTCAGGAGGGAGGTGGCGGTGTAATAGAAGCAAATCGAAATGCTTTGGATAGGCAAGGATCACTCTACAGCCTCACTCTTGACGAAGTTCGGAATCAATTGGGGAGTAGTGGAAAACCACTCAATAGCATGAATCTTGATGAGTTTGTTAAAACTGTACGGACTATTGAGGCTAATCAAGAAGTGGGCGGAAATGGTTACGGGGCAATGCAGCACGGGGCTTCTGTGCATCATCAATCGAGCATAACAATGACCAGGGATCTAAGCAAGAAGACTGTCGATGAGGTGTGGCAAGATATTCAGCAGGGGGGAAAAAGAGAGAGCGTTGAGAAGAGAAGCCCGGAGATGCAACTTACTTTAGGTGAGATAACTCTG…	MVVTRGMGSQEGGGGVIEANRNALDRQGSLYSLTLDEVRNQLGSSGKPLNSMNLDEFVKTVRTIEANQEVGGNGYGAMQHGASVHHQSSITMTRDLSKKTVDEVWQDIQQGGKRESVEKRSPEMQLTLGEITLEDFLVKAGVIAESNQGKRNSGLVSGVNSMALGQQAQWPHYRIPAMQQVPEHHHQQQQQQNRQPVFMPGHPIQQPLPVVANPIMDATNPETKVTMSPAHAVGTLSDTHTMGRKRAAPGDVIENSAERRQKRMIKNRESAARSRARKQAYTHELENKVSRLEEENERLKRQKEIENILPSVPPPEPKYQLRRTSSGPI*
204	Capsicum baccatum	CBAC_54	CB.CBv1.2.scaffold699.5		S	Chr11	8291555-8292211	ATGCTCTCCTACAATCTCACCATTATCTGCAAATTGAAGTTTCTTCATATAAATTTAACTATGATTCCATCAGAGGCTACTGCAACTCACTACTTTGCGTCCGAAAATCCTTCACCTTTGCCTCTTGACTTCAACTTCATGCACAACAGTTTACCATCAATCCAGTTTAGCAGATACTTAACAAATGTACCAAATTATCCAACTTCACTTCATGTTCATGACTTTAACAATCTGCCACTATCTTGCATCAGTAGTAACTCTACCTCTGATGAAGCGGACGAGCAGCAACTTAGGATCAACGATGAGAGAAAGCAAAGGAGGATGATATCTAACCGAGAATCAGCAAGAAGATCCAGGATGAGGAAACAAAGACATCTTGATGAGTTATGGTCACAAGTT…	MLSYNLTIICKLKFLHINLTMIPSEATATHYFASENPSPLPLDFNFMHNSLPSIQFSRYLTNVPNYPTSLHVHDFNNLPLSCISSNSTSDEADEQQLRINDERKQRRMISNRESARRSRMRKQRHLDELWSQVLRLRTENNNLIDKLNHVSECHEKVLQENVQLKEEASDLRQMLTDLQFNSPFPDLCDLDDDVPCTTAHLKAESSNLSITYSTNLLH*
205	Capsicum baccatum	CBAC_55	CB.CBv1.2.scaffold828.18		K	Chr11	11452081-11454199	ATGGTAGATAACATCGATGATATCGCTGCGCACATCAACTGGGACGATGTAGATCACATCTTCCACAACGTTCTACACAATGATCTCTTCACTGTTCATGATCCCGATCCCGATCCCGATCCCGATCCCGATCCCTCTGCACCCAATTTCCAGGATATCGAGCAGCTTCTCATGAACGACGACGATGTTGAAGATCAAGCTGATACTCAATTTGCGGCCGAATTTCTCTCTGATGTGCTGGTTGATTCACCTGCTCAGTCCCATCAATCTCCCTCTGCTGAAGAAGAAGCCTTTGGATTCCCCGATTCCAAGGTTTCTAGTGGATCCGAGGACAACAAGGACAAGGTCTCTCACTCGCCCTCTGACGCTGACGAACTGAACAACGATGACCCCATAGAT…	MVDNIDDIAAHINWDDVDHIFHNVLHNDLFTVHDPDPDPDPDPDPSAPNFQDIEQLLMNDDDVEDQADTQFAAEFLSDVLVDSPAQSHQSPSAEEEAFGFPDSKVSSGSEDNKDKVSHSPSDADELNNDDPIDKKRKSMIIFFQVKFVNTDFVKAHDGSTFPLVCDRELSQDTLQRLPGLLQLRNRDAAVRSRERRKLYVRDLELKSKYFESECKRLGFVLQCCLAENQALRFSLQNSSANGVSMTKQESAVLLLESLLLGSLLWFLGITCLLILPSQTWSIPEENQGSRNPGLLVPIKRGKKTSRSLAFLSFMMGKRCKASRSRMKFNPHSLGIVM*
206	Capsicum baccatum	CBAC_56	CB.CBv1.2.scaffold17.14		A	Chr11	100436873-100444056	ATGAATCAGCTGTTAGAAGAAATCAAAACATCTCCTCCAACAGATGGTCCATTTGTCATAATAGATAATCCATATGTTGCAACAGATGTCTCATCTGTTGCAACATACAGACCATCTATTGCGATAGATGATATGCCTGATCCTGTTTGGGACATTTCTATTCTGCGCGACATTGTGCGAGAACTTCAAAGGAAGATTTTCCTTGTCATAACCATGGGATCTTACCTGAACTTCAAGAACTTTGCTGACACATCACAATCAGAGAGCAGCGGGACTAATAATTTTTCATTGGCCAGACAATCTACCATATACTCCTTTACCTTTGATGAGCTGCAAAGTACATGTGGACTTGGAAAAGATTTTGGATCGATGAATATGGATGACTTCTTAAAGAATATT…	MNQLLEEIKTSPPTDGPFVIIDNPYVATDVSSVATYRPSIAIDDMPDPVWDISILRDIVRELQRKIFLVITMGSYLNFKNFADTSQSESSGTNNFSLARQSTIYSFTFDELQSTCGLGKDFGSMNMDDFLKNIEGENLQRQGSLTLPRTLSQKTIDEVWKDFQKESVNANDVSETGGSNFGQRESTLGEMTLEEFLVRAGAVREDMQPTGYSNDVTLTTTSGFIQPSSNVTIKFLQATQNPGHQIAGTNIFNVVSTTSLPQQPLFPKQTTVEFASPMPLGTRAPMPNPSANSNSIMQGGVMSMPVKGVSPGNLDTSSLSLSPYACGEGGRGRRSCTSIEKVVERRRKRMIKNRESAARSRDRKQAYTLELEAEVAKLKEIKQQLQKNQAEFIEKQKNQL…
207	Capsicum baccatum	CBAC_57	CB.CBv1.2.scaffold182.12		D	Chr11	187144222-187156852	ATGGTTGATATCAGTCCTAGTACGTCAACAGATGCCGATACTGAAGATAAGAACAGGTTCCTAAATCAACAACTGGCCATAGCTTCTGATGGAAGTGACAGACCGAAAGATCAAAAGACACTCCGTAGACTTGCTCAAAATCGCGAAGCCGCTCGAAAAAGCCGTCTAAGGAAAAAGGCATATGTTCAACAGTTAGAGAGCAGCAGGATGAAGTTGACACAACTAGAACAGGAGCTTCAACGGGCCCGGCAACAGGGAATATTTATTTCAGGTTCAGGAGATCAATCACAGTCGATGAGTGGAAATGGAGCTTTGGCATTTGATGTAGAATATGCCCGATGGTTGGAAGAGCAGAATCGACGAATTAATGAATTACGGGGAGCTGTTAATTCTCATGCT…	MVDISPSTSTDADTEDKNRFLNQQLAIASDGSDRPKDQKTLRRLAQNREAARKSRLRKKAYVQQLESSRMKLTQLEQELQRARQQGIFISGSGDQSQSMSGNGALAFDVEYARWLEEQNRRINELRGAVNSHAGDAELRIIVDGISAHYDDIFRIKGDAAKADVFHILSGMWKTPAERCFLWLGGFRSSELLKLLINQLEPLTEQQLLAINNLQQSSQQAEDALSQGMEALQQSLAETLAGSLGPSGSSGNVANYMGQMAMAMGKLGTLEGFIRQADNLRQQTLQQMHRILTTRQSARALLAISDYFSRLRALSSLWLARPRE*
208	Capsicum baccatum	CBAC_58	CB.CBv1.2.scaffold929.2		S	Chr11	227373513-227379160	ATGATGATGCCCGGTGAAGCTGGAGGAAATATTGATACTATGATGATTCCCAGTGAATTCGGAGGAAATATTGATACTATGATAATGCCTGGTGAATTTGGAGGACATATTGATACTATGATGATGCCCGGTGAATTCGGAGGAAATATTGATACTATGATGATGATGCCCAATGAATCCAAAGGAAATATTGATACTATGATGATGCCCAATGAATCCAGAGGAAATATTGATACTATAATGATGCCCGATAAATCCGAAGGAAATATTGATACTATGATGATGTCCAGTGAATCCAGAGGAAATGTTAATGTTATGATGATGCCCGGTGAATCTGGAAGAGGTAATGATGTTATGATGATATCCGGAGAATCCAGAATAGGTAATGATGTTATGATG…	MMMPGEAGGNIDTMMIPSEFGGNIDTMIMPGEFGGHIDTMMMPGEFGGNIDTMMMMPNESKGNIDTMMMPNESRGNIDTIMMPDKSEGNIDTMMMSSESRGNVNVMMMPGESGRGNDVMMISGESRIGNDVMMIRSESERGNYVMMMPSESERAPRYAKFDERKRKRMESNRQSAKRSRMRKPQRLEELKNETTQLQNQNSICRDKIDSV*
209	Capsicum baccatum	CBAC_59	CB.CBv1.2.scaffold539.50		D	Chr11	252816285-252830809	ATGGAGAATCAAAGAGGCACAGCAAGTACTTTGTCAGCTGATCATCATAACATGCCTTATAACACAAGCCTCATGTATCATTCCACAATAAATAGTAATCAAGAACCATCATCAACTTTTGATTTTGGGGAGTTGGAAGAAGCAATTGTTCTACAAGGAGTTAAGATGAGCAATGATGAGTCTATTAAATCATCTTTATATGAAGCAGCCACAAACAGACCTGCAGCAACTTTGGAGATGTTCCCTTCTTGGCCTACTAGAGTCCATCACACCCCAAGAGGAAGCTCAAAATCAAGAGGAGAACAAAGTAGTGATTCAGGTTCAGCACTAAACACAACAATTTCAAGTAAAGGTGAAGCAAATTTGGAGCCAGAATCTCCTATTAGTCAACAACAACAA…	MENQRGTASTLSADHHNMPYNTSLMYHSTINSNQEPSSTFDFGELEEAIVLQGVKMSNDESIKSSLYEAATNRPAATLEMFPSWPTRVHHTPRGSSKSRGEQSSDSGSALNTTISSKGEANLEPESPISQQQQFQEMASDSPTTGVSHTEKRKGAGSTSDRVTDAKTLRRLAQNREAARKSRLRKKAYVQQLETSRMRLAQLEQELQRARSQGLFMGGGAAGPNISSGGAMFDMEYSRWLDDDQRQISELRTALQSHLGDVELRIIIDDYIAHYDDLFRLKGIAAKSDVFHLITGVWVTPAERCFLWIGGFRPSDLIKMLIAKLDPLTQQQVVGIYSLQQSSQQAEEALSQGLEQLQQSLIETIATGPANDGMHHMAIALAKLENLEVFLHQADNLRQQ…
210	Capsicum baccatum	CBAC_60	CB.CBv1.2.scaffold352.49		St	Chr11	256609029-256614560	ATGGCTATGGTGGCACAGCAGCATAGGGAGAGTAGTAGTGGTAGTATTACAAAACATCTTGATAGTAGTGGAAAGTATGTTAGATACACAGCTGAGCAAGTTGAAGCTTTGGAGAGGGTTTATGCTGAGTGTCCTAAGCCTAGTTCGTTGCGCCGGCAGCAATTGATCCGTGAATGTCCTATTCTGTCGAATATCGAGCCTAAGCAGATCAAAGTTTGGTTTCAGAACAGAAGGTGTCGAGAGAAGCAAAGGAAAGAATCTTCTCGACTACAGACCGTAAATAGAAAATTGTCTGCCATGAATAAACTGTTGATGGAGGAGAATGACCGCTTGCAGAAACAAGTGTCGCAGCTTGTATGTGAAAATGGCTATATGCGGCAACAATTGCAAAATGCATCG…	MAMVAQQHRESSSGSITKHLDSSGKYVRYTAEQVEALERVYAECPKPSSLRRQQLIRECPILSNIEPKQIKVWFQNRRCREKQRKESSRLQTVNRKLSAMNKLLMEENDRLQKQVSQLVCENGYMRQQLQNASAATTDVSCESVVTTPQHSLRDASNPAGLLSIAEETLAEFLSKATGTAVDWVPMPGMKPGPDSVGIFAISHSCSGVAARACGLVSLEPTKIAEILKDRPSWFRDCRNVEVFTMFSAGNGGTIEILYTQIYAPTTLAPARDFWTLRYTTTLDTGSLVVCERSLSGTGAGPNAAAASQFVRAQMLPSGYLIRPCDGGGSIIHIVDHLNLEAWSAPEILRPLYESSKVVAQKMTIAALRYARQLAQETSGEVVYGLGRQPAVLRTFSQRL…
211	Capsicum baccatum	CBAC_61	CB.CBv1.2.scaffold967.18		E	Chr12	39578025-39581968	ATGTCAAGGCAAGCTCATCTTCCACCTCGCTGTCCGTTTCAGAAGAAACCGTTAACTTGCCCGGTTCAAGGTCCTTTTAGCCCACCATCACAGCAACAGAACCCGTTGCCTCCTCGACATCAAAAATCTGTTTCCGAAAGCTCCATTCTAGAAGAGCAGCCTGTATGGCTTGATGAGCTTCTGAGCGATTCGGGCTCAAATTCTAGTGGCATAATGCATAGGAGATCAGCTAGTGATTCTTTGACACTTTTGGATGGTCTTGGTTCATTGGAAGGCTTTGATAAGTTTGACGAAACTGAATCCAATGCTTCTTGTGAATCGGATAGTAGTTCAAAGACTAATTGTATCTATGGTCCTAATTCACCCCGTGGAAAGAGCAACATAACCTTTGCAGACAAT…	MSRQAHLPPRCPFQKKPLTCPVQGPFSPPSQQQNPLPPRHQKSVSESSILEEQPVWLDELLSDSGSNSSGIMHRRSASDSLTLLDGLGSLEGFDKFDETESNASCESDSSSKTNCIYGPNSPRGKSNITFADNAIVSALSEYVSPNPLQYLDRCISVSGAAQSESVGNASGAADDVSAEAKPMKRHPGQRSRVRKLQYIAELERTVNTYEAIESDLTAKVASLLQRRVTLSMENRELKQQMLRLQQEKVIVDAQCRSLRKELERLKQLARSRNGKLSTNFRVNFAAEMTGSDAAWQMLDFGKLDLN*
212	Capsicum baccatum	CBAC_62	CB.CBv1.2.scaffold1611.1		D	Chr12	143956496-143960469	ATGAATTCTTCAACCTATACTCAATTTGTTGCCTCAAAAAGGATGGGTATATGTGACCCGATCCATCAGATTGGCATGTGGGGAGATTTCAAAGGTAGCAGTTTCCCAGACACCTTGATTCTTGAAGTCGAGAATTGCCTAGAGAGCGAGATGCCTATTATGGAGAAAAGATTAGATAATGAGACAGAGGAACCTTCACATGTAACAGTTGGAAGGTCTAATATATATGAACCAGAAACAAGTAAACGCATTGACAAGCTTTATATACAGATGAATAGACGCCTCGCACAAAACCGTGAGGCTGCTCGTAAAAGTCGTTTACGGAAGAAGGCCTATGTCCAGCAGTTGGAAAATAGTAAACTGAAGCTGCTTCAGTTGGAACAAGAATTAGAACGTGCT…	MNSSTYTQFVASKRMGICDPIHQIGMWGDFKGSSFPDTLILEVENCLESEMPIMEKRLDNETEEPSHVTVGRSNIYEPETSKRIDKLYIQMNRRLAQNREAARKSRLRKKAYVQQLENSKLKLLQLEQELERARQQGLYVGGGGLDASQIGCSGTANSEIATFEMEYGHWVEEQDRQTDDLKSALNSQIGEIEMRILVEGCLNHYFDLFRLKATAANTDVLYLMSGTWKASAERFFLWIGGFRPSELLKVLTPHVEPLTEQQVQEVCNLTQSCQQAEDALSQGLVKLHQILAEAVAAGTLGDGIILPQMTATIEKLEALVRFVNQADHLRQETLLQMSCILSVQQSAQGLLALGDYFKRLRSLSSLWSSRTSEPA*
213	Capsicum baccatum	CBAC_63	CBAC_bZIP.Chr12.1		A	Chr12	151630811-151631017	ATGGAACCACTAAAACCATCACCACCCCACATAGGATATCAAAATAGGGTTGTAGTGGTGACTATTACAGAGAGTGAAAGTGGAAGTGTAAGAGATAAGAGAAGGTCAACTGTGGAGGAATTGCCGGCTAACAATGCTACACAACAGAAACAACGACGTATGATTAAGAACAGAGAGTCTTCTGCCAGTTCTAGAGAGCGAAAATAG	MEPLKPSPPHIGYQNRVVVVTITESESGSVRDKRRSTVEELPANNATQQKQRRMIKNRESSASSRERK*
214	Capsicum baccatum	CBAC_64	CB.CBv1.2.scaffold244.3		St	Chr12	163000502-163009697	ATGTCCTGCAAGGATGGTAGATCAGTTGAAGATAACGGCAAGTATGTCCGTTATACACCTGAGCAGGTTGAAGCTCTTGAAAGGCTATATCATGAATGTCCAAAACCCAGTTCAATGCGTCGTCAGCAGCTTATTCGTGAATGTCCTATTCTCTCCCACATTGAGCCTAGGCAAATCAAAGTTTGGTTTCAAAATAGAAGATGCCGGGAAAAACAGAGGAAAGAGTCATCAAGGCTTCAGGGTGTGAATAGAAAGCTGTCAGCAATGAACAAGCTATTAGTGGAAGAGAATGATAGATTGCAGAAGCAAGTTTCTCAACTGGTATATGAAAATGGATACTTCCGCAAGCAAACTCAAACTACAAAGCTTGCTTCAAAAGACTCCAGTTGTGAATCAGTG…	MSCKDGRSVEDNGKYVRYTPEQVEALERLYHECPKPSSMRRQQLIRECPILSHIEPRQIKVWFQNRRCREKQRKESSRLQGVNRKLSAMNKLLVEENDRLQKQVSQLVYENGYFRKQTQTTKLASKDSSCESVVTSGQHHLTPQHPPRDASPAGLLSIAEETLTEFLSKATGTAVEWVQMPGMKPGPDSIGIIAISHGCTGMAARACGLVGLDPTRVAEILKDRPSWYRDCRAVEVLNMLPTANGGTIELLYMQLYAPTTLAPPRDFWLLRYTTVTDDGSFVVCERSLRNTQNGPSMPPVQNFVRAEILPSGYLIRPCEGSGSIVHIVDHMNLEAWSVPEVLRPLYESSAVLAQKTTMAALRQLRQLTLEFLQPNVTNWGRRPAALRALSKRLSRGFNE…
215	Capsicum baccatum	CBAC_65	CB.CBv1.2.scaffold146.3		D	Chr12	167636788-167639596	ATGAACATGAGTTCTCCATCAACTCAATTTGCCCCCACAAGAAGGATGGGCATATTTGAACCTTTCCACCATATGAGTGTGTGGGAAGACACATTTAGAGGTGACATTATGCCCAGCACTGGTGCGTGTATGGTCACACCGACAAATGACAGGGCAGATGACAAGATACAACGGCGTCTTGCACAGAATCGTGAAGCTGCCCGAAAAAGCCGTATGAGGAAAAAGGCTTATGTTCAGCAGCTTGAAAAAAGCAATTTAAAGTTAGCACAACTTGAAATGGAACTTGAGAGAGCTCGACAGCAGGGACTGTACATTTTAGGTTCAAATGGCAATATGGGGCTAAGTTCAACAATTAATCCAGGAATAGCTGCATTTGAAATGGAATATAGCCTCTGGGTT…	MNMSSPSTQFAPTRRMGIFEPFHHMSVWEDTFRGDIMPSTGACMVTPTNDRADDKIQRRLAQNREAARKSRMRKKAYVQQLEKSNLKLAQLEMELERARQQGLYILGSNGNMGLSSTINPGIAAFEMEYSLWVEEQQKKNVELRNILQSHVTEMELQLLVETVLNHYYNLFRMKADAAKADVFYLMSGMWRCSVERFFLWIGGFKPSELINIVMPQLEPLSDQQIVKICNLRHCCQQAEDALTQGMDKLQQTLAQGILTMTTGMGSYSSQMVSSMEKLEALESFVNQADHLRQQTLQQMSLILTTRQSARGLLAFGEYLQRLRALSSLWAARPCEPT*
216	Capsicum baccatum	CBAC_66	CB.CBv1.2.scaffold515.48		A	CBv1.2.scaffold515	1258328-1262202	ATGGGGAGTAATTATAATTTCAAGAACTTTGGAAATGAGCCACCAGGGGAGGGTGGAAGTGGTGGTTGTGGAAAGCAGCCAGGGAACTTTCAGTTGCCGCGGCAGTCATCTATCTATTCGTTGACGTTTGACGAGTTTTTGAGCTCAACGGGAGGGATTGGAAAGGATTTTGGGTCAATGAACATGGATGAGTTGCTGAAGAATATATGGAGTGCTGAGGAGAGTCAAACTATGGGAGGTACTGGGATAGGTGGGCAAGAGGTTGGTGTTTCAGGTGGGCATTTGCAGAGGCAAGGCTCTTTGACTTTACCTAGGACACTGAGTCAGAAGACTGTTGATGAAGTTTGGAGGGATATGTCAAAGGAGCATGGTGGTGGTGGTGGTGGTGGTGGTGGAAAG…	MGSNYNFKNFGNEPPGEGGSGGCGKQPGNFQLPRQSSIYSLTFDEFLSSTGGIGKDFGSMNMDELLKNIWSAEESQTMGGTGIGGQEVGVSGGHLQRQGSLTLPRTLSQKTVDEVWRDMSKEHGGGGGGGGGKDGNSIGVPPNMPQRQQTLGEITLEEFLVRAGVVREDAQLAAKSNNAGGIFADLSYAGNNTGLAFGYQQPNRNTGLMAGSIPNKNGESVIQSANLPLNVNGVRSTQQQLRPQQLQQNQQPQPQPQPQPQQQPIFPKQPALPYGAPMAVPNSVQLGSPGLRAGMAGIADPALNSNFIQGANLMGGGMNMVGLGAGGVTVATASPGVSSDGLGKSNGDTPSVSPVPYVFNGGLRGRKYSTVEKVVERRQRRMIKNRESAARSRARKQAY…
217	Capsicum baccatum	CBAC_67	CB.CBv1.2.scaffold769.22		B	CBv1.2.scaffold769	1222442-1225144	ATGGGCGATTCAGTTGTGGCCGATCCACCACCGTTGACGTCGGGGGAAGTGGCGGCGAATCCTGCCGGAGAATTTGACGGTCTTCCAGTTCCACCTTTTGATGGTAATTTTTTCGCTCAACAAATGACGTCAGCAGATCACGATGATTTTCCGATTGAATTCCAGCTTGATGATATCGATTTCGATCTGTCGTTCGATGATTTTTTTCAGAATCCTTGTGATGGTAATTTGCCTGATTTTCTCGGGCCGGATCCGGGTCTGATTGACCCGAATAGCTTCGGTCAAATCGGGGATTTTGATTCCTCCTTCGATGATTGTCTTAAGGAACCTCCGGGTTCGAATTTGGGGCACATGGACCCTAATTGCTTTGGCCAAATTGGGGATTTTGACAATATTGAT…	MGDSVVADPPPLTSGEVAANPAGEFDGLPVPPFDGNFFAQQMTSADHDDFPIEFQLDDIDFDLSFDDFFQNPCDGNLPDFLGPDPGLIDPNSFGQIGDFDSSFDDCLKEPPGSNLGHMDPNCFGQIGDFDNIDESSGNVKLTSTDTSSPELYQSSSSSGVLNEQGSTDVFGYLNVSSPESNGSNNKDLSDVKVKALNCRSPESQGSGNCGSNLSEGLNYQSDSNKSVHSSPNLGNNSMKGVVVEQKFKVERVNAGISKCSSILKRKKCSEDSNNINKIQKSNTFSLSDNVNSEEDEKRLARLIRNRESAHLSRQRKKHYVEELEDKIRMMHSTIQDLNAKVSYVMAENVTLRTQLGGAGVPPPVPPPPGMYPHPPVMYPWMGYTPPYMMKPQGSQVPLV…
218	Capsicum baccatum	CBAC_68	CBAC_bZIP.CBv1.2.scaffold775.1		D	CBv1.2.scaffold775	939707-945963	ATGGCTAGTCAAGGAATAGGAGGGACTGGTTTGACAGACTCTGGACCATCATCACATTCACACCATAACCACAATATGCCATATGCTGTTTATAGGGGGATAAATCCTGCTAGCACAAGTTTCATTAATCAAGAAAGTTCTGGTTTTGACTTTGGAGAGCTAGAAGAAGCTTTTGTACTACAAGGATTTAAGATTAGTAATGATGAAGCTAAAGCATCTTTATATGCAGCAGCAGCAGCCACAGGGAAACCTGCTGCAACTCTGGAGATGTTCCCTTCTTGGCCTATGAGATTCCAACAGACCCCAAGAGAGAAGTCAAAATCAAGAGAAGAGAGTACTGATTCTGGTTCACTTTCAAGTAGAGTTCAACCCCATTTAGAGCCAGAATCACCCATCAGT…	MASQGIGGTGLTDSGPSSHSHHNHNMPYAVYRGINPASTSFINQESSGFDFGELEEAFVLQGFKISNDEAKASLYAAAAATGKPAATLEMFPSWPMRFQQTPREKSKSREESTDSGSLSSRVQPHLEPESPISRKASSDHQQNTQEQQQQLQNMASNNPRTGGLQTELAASKSNSEKKKGAASTSERVLDPKTLRRLAQNREAAKKSRIRKKAYVQQLETSRMRLSQLEQELQRASSQGIFLGGGTTAGSNISSGAAIFDMEYSRWLDDDQRHMSELRTALQAHLSDGDLRLIVDGYIAHYDEIFCLKGVAAKSDVFHLITGMWTTPAERCFLWMGGFRPSELIKMLIGQLDPLTEQQVVGIYSLQQSSQQAEDALSQGLEQLQQSLIDTIATASLHDG…
219	Capsicum baccatum	CBAC_69	CB.CBv1.2.scaffold994.3		D	CBv1.2.scaffold994	87987-92651	ATGAGGCCAAGCAATGTTGGTGTAGTTTCTTGCAACAATAATAACTTACATTTTGGCGAACTTAATACGAGTATTGGTTCAACAGAAATTGGTTCATCAGAGACAGGAGTGGATACAGGGAGGTTCATGTTGCAGAAGGCACAAACAGCAATGTTGGGGGCTGGTTTGGTAGGTGGTGTTGCTGGTAGTGTGGCATTGGGAAATGTGCAGCATTTTGAGAATTGGGGTGATTCTGGTATTGCAGACCATAGCCAGCAGACTGACACTTCCACAGATGGCCAAGGGATTCAGCATGGTGCATTAATAGCTGTGGACTCCATGGATCAGTCCAAAATAAAGCTTGGAGACCAGAAGACACTTCGCAGGCTGGCTCAGAATCGAGAAGCTGCTAGGAAAAGC…	MRPSNVGVVSCNNNNLHFGELNTSIGSTEIGSSETGVDTGRFMLQKAQTAMLGAGLVGGVAGSVALGNVQHFENWGDSGIADHSQQTDTSTDGQGIQHGALIAVDSMDQSKIKLGDQKTLRRLAQNREAARKSRLRKKAYVQQLENSRLRLSQLEQELKRARQQGIFIANGYTGDQSLSAGGNGALAFDMDYARWLEEHQRLISDLRSAVNSHRGDNELRHLVDGVMSHYDEKFKLKSVAAKSDVFHMLSGMWKTPAERCFMWLGGFRSSELLKILGNHLEPLTEQQLMGICNLQQSSQQAEDALSQGMEALQQSLVDTLSSTSLGPTGTGNVADYMGQMAIAMGKLATLENFLYQADLLRQQTLQQLHRILTTRQAARALLVISDYMSRLRALSSLWL…
220	Capsicum baccatum	CBAC_70	CB.CBv1.2.scaffold1810.3		S	CBv1.2.scaffold1810	22489-22905	ATGTCAGCTTTAAGGCAGAGTGTTAGTTCATCTGCATCAGAAGATGATCAAAGGTATGCAGGAATGGATGAAAAGAAGAGGAAAAGGATGATATCCAACAGGGAATCGGCGAGGCGTTCGAGGATGAAGAAGCAGAAGCTTCTGCAAGATTTGACAGGTGAAGTGAGCAGATTACAGGGTGCAAACAAGAATATTGTGACTAAGATTGAAGAGACAACGGAGAGATATACAATTTGTGCTGCACAGAATAATGTGTTGAAGGCACAAGTAATGGAATTGACTGATAGGCTCAGGTATTTAAATGATGTTATTGAGAGTACTGGTTTGGCTGCTGATGTTGCTGATCCTTTGTTGAAGCCATTGCAGACTCCTTGTCCAATGCAGCCCATTGCTTCTTCG…	MSALRQSVSSSASEDDQRYAGMDEKKRKRMISNRESARRSRMKKQKLLQDLTGEVSRLQGANKNIVTKIEETTERYTICAAQNNVLKAQVMELTDRLRYLNDVIESTGLAADVADPLLKPLQTPCPMQPIASSGLFKF*
221	Capsicum baccatum	CBAC_71	CB.CBv1.2.scaffold2114.2		A	CBv1.2.scaffold2114	59186-68936	ATGGGATCTCAAGGGGGTGGTGGGGTTAATAGTGTTGGTGCAACACAAGCTCAAGACCCGAAAACGAATGCTTTGGCTAGGCAAGGATCATTATATAGTCTCACTCTTGATGAGGTTCAGAATCAATTAGGGGATTTGGGGAAGCCGTTGAGTAGTATGAATCTTGATGAGCTTCTTAAGACTGTATGGACTGCTGAGGCTAGTCAAGGAATGGAGGGAACGGATTACGGGGCGTTGCAGCATGGTCAGGTTGCTTCGGGGAGTTCTTTGCATCGACAATCGAGCATTACATTGACTAGTGATTTGAGCAAGAAGACTGTTGATCAGGTGTGGCAGGATATTCAACAGGGGCATAAAAGGGATAATATCGATAGGAAAGCTCAGGAGAGGAAGCCTACT…	MGSQGGGGVNSVGATQAQDPKTNALARQGSLYSLTLDEVQNQLGDLGKPLSSMNLDELLKTVWTAEASQGMEGTDYGALQHGQVASGSSLHRQSSITLTSDLSKKTVDQVWQDIQQGHKRDNIDRKAQERKPTLGEITLEDFLVKAGVVAESNPGKKSSGSVLGVDSMALAQQSVQQQAQWSQYQIQAMHQIPPQQQPQQQNMLPVFMPSHPVQQPLTIVPNPTIDAVYPESQMTMSPTALLGTLSDTQTLGRKRVAPEDVVEKTVERRQKRMIKNRESAARSRARKQAYTHELENKVSRLEEENERLKRQKEIEKVLPSVPPPEPMYQLRRTSSAPF*
222	Capsicum baccatum	CBAC_72	CB.CBv1.2.scaffold2349.1		S	CBv1.2.scaffold2349	52739-53317	ATGATTTCATCAGAGGCTGCAACAATCCACTACTTAGCACAAGAAAACCCTTCATCAATTCCTATTGATTACAGCTTCATGCACAAAGCCTTACCAGCATTCCAGTTCAGCACATTCTTGACCAATAACAACATACAAAATTATCAGGCCTCTTTTCCTTTTCAAGATTTCAGTACACAGCCATCATGCATCAGCAGTAACTCGACCTCTGATGAGTCAGAGGAACACCAGCATAGAATCATCGATGAACGAAAGCAGAGGAGAATGATTTCTAACAGGGAATCAGCTAGAAGATCAAGGATGAGGAAACTGAGGCACCTTGATGAACTCTGGTCCCAAGTGCTTCGTCTTCGAACAGAGAACCACAATCTGATCAATAAGTTAAATCAAGTCGCAGAA…	MISSEAATIHYLAQENPSSIPIDYSFMHKALPAFQFSTFLTNNNIQNYQASFPFQDFSTQPSCISSNSTSDESEEHQHRIIDERKQRRMISNRESARRSRMRKLRHLDELWSQVLRLRTENHNLINKLNQVAESHEKVVEENMQLKEEASDLRRLLTDIQLSSSFDAFSELDEVPCNTADHLKAESSNQSTT*
223	Capsicum baccatum	CBAC_73	CB.CBv1.2.scaffold2735.2		A	CBv1.2.scaffold2735	60082-69680	ATGGCGTCAATGAAGCTGATGTCATCATCGGCGTCGCGGAATTCCGATCGAAGGAAATCGTCTGCTGCGTCGTCGTCTTCGTCGTCGACAATTCCGAATGATATGCAGAATCAGCAGTACTCGAATAACGGGAGTAACAACAGTAGTAATTTGGAGGCGACTTCGATGACGGCTGATGGAATTTTCCCTAATGCGTATGTAGAGAGTCAGGGGATTACGTTACTCGATGCTGCCGGAGCGATAACTCCGATCAGTGATTCCGAGACAGTGCCAGTGATGGCTCCGGTTAGGAGGACGGTGGATGATGTGTGGAGGGAGATTGTGGAAGGGAAGAGGGAACAGCGAAGGGCAGCAATTGCGGGCTGTAAGGAAGAGGCAGTGGATGGAATCATGACGCTG…	MASMKLMSSSASRNSDRRKSSAASSSSSSTIPNDMQNQQYSNNGSNNSSNLEATSMTADGIFPNAYVESQGITLLDAAGAITPISDSETVPVMAPVRRTVDDVWREIVEGKREQRRAAIAGCKEEAVDGIMTLEDFLVKAGAVEEESVAMQGPVQGEVKVELGTERLSGGIFAYDAPYMATPQQSVQGFGNGMEVIGGGRGKRKAILEPLDKAALQRQRRMIKNRESAARSRERKQAYQVELESIAVRLEEENEQLLKEKEERTRAHYKQLIEKVIPIVEKRKPPRVLRRVCSMQW*
224	Capsicum baccatum	CBAC_74	CB.CBv1.2.scaffold8196.1		A	CBv1.2.scaffold8196	13-524	ATGGATGCTGTTGCTGGGAAGGTAATTGACCTTATAGAGAAGGCCGGTACATATTTCATAAGGAAGATTAAAAGTTGCATAAACTTTGGTAAGAATTTGAAAACTCTGGAAAGAAATGTAAAGCGATTATCAGATAGAGCAGACAATATGAAGACACGGGTTGAAAATCAAGAGCGATCTGGGAGGAAGAAGAGGAAACAAGAAGTTGAATCTTGGCTTAATGAGGTTGAACAGCTCAAAGAAGAATTTCATCAGTTAAAAGAAGAAGCAACAAGAGGGAAGAAAAATATAGGTGTTTTGGAGAAGATGGATGGAAGGGTCGGAGAACTTCTCGAGCAAAGTAGAGATTTTGGAGAGCTCGTGTATGATGTTTATGAAAGCGAGGAGTGTCCAGTGCAG…	MDAVAGKVIDLIEKAGTYFIRKIKSCINFGKNLKTLERNVKRLSDRADNMKTRVENQERSGRKKRKQEVESWLNEVEQLKEEFHQLKEEATRGKKNIGVLEKMDGRVGELLEQSRDFGELVYDVYESEECPVQHRNIWYGRGG*
225	Capsicum chinense	CCHI_1	CC.CCv1.2.scaffold412.10		G	Chr01	21608821-21616374	ATGGGGAGCAGTGATATTGACAAATCCTCTAAGGAGGCAAAGGAGGCAAAGACTCCCAATTCACAGGAGCAGGCTTCATCTGCCGCCACTGGTACAGTAAATCCAGATTGGTCCGCTTTTCAGGGTTATTCTCCGATGCCTCCACATGGGTTCATGGCTTCAAGTCCTCAAGCACACCCTTACATGTGGGGAGTTCAGCATCTTATGCCACCCTATGGTACTCCACCACATCCTTATGTCGCAATGTATCCCCATGGTGGAATATATGCTCATCCATCTATTCCTCCGGGATCTTACCCCTTTAGCCCCTTTGCGATGCCTTCTCCAAACGGCATTGCCGAAGTTGCAGTCAACACCTCTGGCAATGCTGAGGTAGATGGTAAATCATCTGAGGGAAAG…	MGSSDIDKSSKEAKEAKTPNSQEQASSAATGTVNPDWSAFQGYSPMPPHGFMASSPQAHPYMWGVQHLMPPYGTPPHPYVAMYPHGGIYAHPSIPPGSYPFSPFAMPSPNGIAEVAVNTSGNAEVDGKSSEGKEKLPIKRSKGSLGSLNMITGKNNEHVKTSGASANGGYSKSAESRSGEGSSEGSDANSQNESPMKSAGGQDSAEEASQNGNSAHSSQNGGISAPHSLVNQTMAIMPMSAVGAGGVPGPTTNLNIGMDYWNAAASPIAGGMVTAGSRDIVQSQMWIQDERELKRQRRKQSNRESARRSRLRKQAECDELAQRAEVLKEENASLRAELSRLRSEHDQLAAQNASLKERLGEVPGRDDPRPSRNDIPLNNGNQHSSQTESTQGGQ*
226	Capsicum chinense	CCHI_2	CCHI_bZIP.Chr01.1		D	Chr01	64882445-64894580	ATGATGGCAGGCATCAGTGCTGTGACTGATACGTCAACGGATGCTGATACAGATGATAAAACCTTGGGGTTTCATAACTCTCAAGCACTGGGTGCTGTTTCTGATGGAAGTGACAAAACAAGAGATCAAAAGACGCTTCGTAGGCTTGCCCAAAATCGTGAAGCCGCACGAAAGAGTCGTCTAAGGAAAAAGGCATATGTTCAACAGTTAGAGAGTAGTAGAATGAAGCTGACACAGCTTGAGCAAGAGCTTCAACGAGCTCGTCAACAGGGCATATATGTTTCAAGTTCAGGAGATCAATCACAGTCAATGAGTGGAAATGGAGCTTTGGCATTTGATGTTGAATATGCACGATGGCTGGAAGAGCACAACCGGCGTGTAATTGAGCTGAGAGGAGCT…	MMAGISAVTDTSTDADTDDKTLGFHNSQALGAVSDGSDKTRDQKTLRRLAQNREAARKSRLRKKAYVQQLESSRMKLTQLEQELQRARQQGIYVSSSGDQSQSMSGNGALAFDVEYARWLEEHNRRVIELRGAVSSHAGDGELRIIVDGILVHYDDLFRIKGNAAKADVFHILSGMWSTPAERCFLWLGGFRSSELLKLLINQLEPLTEQQLLAINNLQQSSQQGEDALSQGIEALQESLAETLAVSLGPSGSSGNVAYYMGQMAMAMGKLGTLEGFIRQADNLRQQSLQQMHKILTTRQSARALLAISDYFARLRALSSLWFARPRE*
227	Capsicum chinense	CCHI_3	CC.CCv1.2.scaffold218.33		A	Chr01	67901512-67917331	ATGAACAATCAGGAGAGAGAACCAACTCTTGGCGAGACAACTTTGGAGGACTACTTGGTGAAAGCTGGGCTTTTTGTTGCTGATGCATCTTTAGGACATACGATGTCACTGGATAATCCTGCGGCAATGCAAAATTATGTGCCTCCGACAGGCTTGTCACCATCCCCTTCGCTGTCTGATACACCGATTTCTGGTCGGAAGAGGGGTGCTAGGGACATTGATAAGACTATTGATCGGAGACTAAGGAGAAAGATTAAGAACAGAGAGTCAGCTGCACGTTCCCGAGCCAGAAAACAGGCTTACCACAATGAGCTGGTGAACAAGGTTTCACATCTGGAAGAGGAAAACATGAAGCTTAAGAAAGAGAAGGAGCTGGAGAAGCTGTTATCCGAGCTGTCG…	MNNQEREPTLGETTLEDYLVKAGLFVADASLGHTMSLDNPAAMQNYVPPTGLSPSPSLSDTPISGRKRGARDIDKTIDRRLRRKIKNRESAARSRARKQAYHNELVNKVSHLEEENMKLKKEKELEKLLSELSSEPRYQLRRTTSF*
228	Capsicum chinense	CCHI_4	CC.CCv1.2.scaffold270.36		S	Chr01	208349989-208350423	ATGGCTTCGGCTCAGCAACCAGCTAGTTCGGGCTCTGATGGCCAGAGATATGCTAATTATGATGAGAGAAAACGAAAGAGAATGGAGTCCAACCGTGAATCTGCAAGGCGGTCACGGATGAGGAAACAGCAGCATTTGGAGGAGTTGATGAGTGAATTGACGCAGCTGCAAAATCAGAACACTATTTGGAGTGAGAGGATTGATGCTGTTGGAAAAAACTATCACACAGTCGAAGCAGAGAACAATGTCTTGAGGGCTCAAATTGCTGAACTGACTGAACGCTTGGATTCCCTTAATTCACTCACTCGTTTCTGGGCTGATGCTAATGGACTTGCTGTGGACATCCCTGAAATTCCAGACGCTTTGCTTGAGCCCTGGCAGCTCCCTTGCCCAATTCAA…	MASAQQPASSGSDGQRYANYDERKRKRMESNRESARRSRMRKQQHLEELMSELTQLQNQNTIWSERIDAVGKNYHTVEAENNVLRAQIAELTERLDSLNSLTRFWADANGLAVDIPEIPDALLEPWQLPCPIQPITASADMLQF*
229	Capsicum chinense	CCHI_5	CC.CCv1.2.scaffold62.7		A	Chr02	1685943-1686677	ATGCGGTCGTCAAGTAGTGAAGAACACCAACAACAACTCAAAGGTCTAGACAAGAACCTTGCAACTTATTCTTCAAAATCATCATCACCATCATCATCCACATCTTCTAGCAATAATTACCCAATTAATCCTGTACTAATAAATAGTAAAACCATGGAAGAAGTTTGGAAAGACATAAATCTTTCTTCTCTCAATGACCACACTTGTTCTAGAGCTCACATGGATCCACAAAGTACTACTGCTAGCACAATCAATTTTGGTGGCATGATTTTGCAAGATTTATTGGCAAAACCATTTGCTAGTGACCCTCCAACAGCAACAACAGCCTATGGTTCCCCTGTTCCCCCCCCTCCACCTGTTACCATGTTGACATTGAATTCTGGCCCTGAACTTCATTTC…	MRSSSSEEHQQQLKGLDKNLATYSSKSSSPSSSTSSSNNYPINPVLINSKTMEEVWKDINLSSLNDHTCSRAHMDPQSTTASTINFGGMILQDLLAKPFASDPPTATTAYGSPVPPPPPVTMLTLNSGPELHFFSSLNPLRKTSICLPKNISNSSTFEALASPAAGRNANGKKRHPESDNHSGDQKNKRMIKNRESAARSRARKQESFASLCMPFKIECVMFLRCYRLRAAPPKCVSYRPSTLN*
230	Capsicum chinense	CCHI_6	CC.CCv1.2.scaffold122.10		G	Chr02	41093585-41100384	ATGGGGACTGGGGAAGAGAGCACCCCTACAAAGCCTTCGAAAGCTACTTCAACTCAGGAGGCACAATCTACACCTTCATATCCTGATTGGTCTTCTATGCAGGCTTATTATGGTGCTGGAGCTGCACCTCCCTTCTTTCCCTCAACTGTTGCTTCTCCTACTCCTCACCCATACATGTGGGGAAGCCAGCATCCGCTTATGCCTCCTTATGGAGCTCCAGTCCCATATCCTGCTTTATATCCTCCTGCTGGAGTTTATGCTCATCCTAATATGCCCATGACTCCAAACACACTGCAGACAAATCCAGAATCAGATAATAAGGCACCTGATGGTAAGGACCAGAATACAAGCAAAAAATTGAAGGGAAGTTCAGGCGGCAAGACAGGAGAGAGTGGGAAA…	MGTGEESTPTKPSKATSTQEAQSTPSYPDWSSMQAYYGAGAAPPFFPSTVASPTPHPYMWGSQHPLMPPYGAPVPYPALYPPAGVYAHPNMPMTPNTLQTNPESDNKAPDGKDQNTSKKLKGSSGGKTGESGKAASGSGNDGARRSAESGSEGSSDDNDENDNHEFSADKSRSFDLMLANGNPVAMPATNLNIGMDLWNAPSAGPGMIKMRSNQPGFSPASGLGREWIQDERELKRQKRKQSNRESARRSRLRKQAECEELQHKVETLSNENHGLKEELRKLSEECEKLTSENNSIKDELTRLCGPEAVSKLENSSNAMHLQSNVEEANS*
231	Capsicum chinense	CCHI_7	CC.CCv1.2.scaffold222.33		St	Chr02	129314151-129320934	ATGGATACTAGCAAGTATGTGAGGTATACACCAGAACAAGTGGAGGCTTTGGAGAGGGTTTATGCAGAATGTCCAAAGCCAACTTCTATTAAGAGGCATCAGCTCATTAGGGAGTGCTCCATTCTTTCAAATGTTGACCCTAAACAGATCAAAGTATGGTTTCAGAACAGAAGATGTCGCGAGAAACAGAGAAAGGAGGCATCTCATCTCCAAACTGTTAATAGGAAGCTGACTGCTATGAACAAACTGTTGATGGAAGAGAATGACAGATTGCAGAAGCAAGTTTCGCACCTTGTGTATGATAATGGATATATGCGTCAACAGCTACATACTGTTAACAGTACGACCACGGATACGTGCTGTGAGACTGTGGTCGTGAGTGGTCAGCAGCAGCAACAG…	MDTSKYVRYTPEQVEALERVYAECPKPTSIKRHQLIRECSILSNVDPKQIKVWFQNRRCREKQRKEASHLQTVNRKLTAMNKLLMEENDRLQKQVSHLVYDNGYMRQQLHTVNSTTTDTCCETVVVSGQQQQQNPMAQHPQRDVNSPTGLLAIAEETLAEFLSKATGTAVDWVQMIGMKPGPESIGIVAVSRNCDGVAARACGLVSLEPMKVAEILKDRPSWYHDCRCLDILSVIPTGKGGTIELIYLQTYAPTTLASARDFWTLRYTTSLEDGSLVICERSLTPTTGGPPATSSVRATMLPSGYLIRPFEGGGSIIHIVDHIDLDACSVPEVLRPLYESSKILAQKMTMAAFRYVRQIAQETNGEIQYVGGRQPAALRAFSQRLCRGFNNAVSGFIDD…
232	Capsicum chinense	CCHI_8	CC.CCv1.2.scaffold1045.1		B	Chr02	148334297-148336868	ATGGCGAATTCAAATCCTCCATCAGACCAAGTCATTCTTGACGACCTCGAACTCGACCTCGATCTCGACTTATCATTCGACGACATCATCCCTCCATCCGAAGCTGATGCTGCAGCTTTTCTCAACCCGAATCCTCTCACTTTTCCCCATTCATGTTTGGAACCCGATCGGGTTGACCCGAATCCGAATCCAGTGGGTCAACCCGGGAGCCAACTGATCCAAACCCGAGCATTCAAATCCTCGCCGGAACTACGTCATGTTTCCGTCGACCTGTCGGAGGCAGATCATAGCTTCGGTAATCAAAGTTCCAGTGGATCCCATGTTTTGAGCCCCGCAGCCGATGTCTCTGAATACCTCAATGTGTCATCGCTGTCGCCGGAATCGGAGTCGTCTAATCAC…	MANSNPPSDQVILDDLELDLDLDLSFDDIIPPSEADAAAFLNPNPLTFPHSCLEPDRVDPNPNPVGQPGSQLIQTRAFKSSPELRHVSVDLSEADHSFGNQSSSGSHVLSPAADVSEYLNVSSLSPESESSNHEDLNCSSPESLGSGNCGSNIVNNSVTSSLNFVDSSIKCGLVEHKVKLEEVNVKYSKCSSSILKRKKVSGDCLDLKDVSKYQKSDFVVECSNVNSGGDDDKKKARLMRNRESAQLSRQRKKHYVEELEDKVRTMHSTIQDLNVKISYIMSENASLRSQMGCSSVALQMPPPPPGMYPHPGVMYPWMHCAPPYMVKPQGSQVPLVPIPRLKPQAAAPPSKSSKKVENKKTEVKTKRVASVSFLGLLFFMLLFGGLVPIVNLRYSGLKE…
233	Capsicum chinense	CCHI_9	CC.CCv1.2.scaffold494.116		A	Chr02	153979327-153979896	ATGTGGTCATCAAGCAGTGACAATAGGGGGCTATCAGCTTCTTCTAAATCAACATCATCATCTGCTTCTTCTTCATCTCATTCCCCATTTTCTCCAAGACTTAAAACCATGGAAGAAGTGTGGAAAGACATTAATCTTTCTTCTCTTCAAGACCATACTACTAATATTTACTCTACAGATCATGATCATCATCAAGGTGCTAATTTTGGTGGAACCATTTTACAAGATTTCTTGGCTAGACCTTTTGCTAATGAACCTTCACCACCAGCAGCTGCTGCAGCAACAGCCTCTCCTGTACCAGCTTCAACTATGCTGAATTTGAACTCTGTTCCGGAGTTTCACTTCTTTGATAACCCTTTAATGCAAAACTCAATCTTGCACCCATCAACTGATAGTTGT…	MWSSSSDNRGLSASSKSTSSSASSSSHSPFSPRLKTMEEVWKDINLSSLQDHTTNIYSTDHDHHQGANFGGTILQDFLARPFANEPSPPAAAAATASPVPASTMLNLNSVPEFHFFDNPLMQNSILHPSTDSCQVVPNVSGRKRVVPETDNNSGGDRKNQRMIKNRESAARSRARKQESAIHFFIFIVL*
234	Capsicum chinense	CCHI_10	CC.CCv1.2.scaffold271.34		G	Chr02	155274284-155282065	ATGAGAGAAGAGAGCACTCCTACAAAGCCTTCAAAGCCAGCTTCAACTCAGGAGACACCAACTGCACCTTCGTATCCTGATTGGTCAAGCTCTATGCAGGCTTATTATAGTGCTGGAGCTACTCCTCCCTTCTTTGCCTCACCCGTTGCTTCTCCTGCTCCCCACCCGTACTTGTGGGGAGGTCAGCATCCTCTTATGCCTCCTTATGGGACTCCAGTCCCATATCCAGCTTTATATCCTCCTGCCGGAGTTTATGCTCATCCTAACATGGCCACGCCATCTCCAAATACTGCGCAGGCAAATCCAGAATCAGATGGGAAGGGTACGGAAGGGAAGGATCGGAATTCTAGCAAAAAGTTAAAGGCCTCTTCTAGTAGCAAGGCAGGGGACAACGGGAAA…	MREESTPTKPSKPASTQETPTAPSYPDWSSSMQAYYSAGATPPFFASPVASPAPHPYLWGGQHPLMPPYGTPVPYPALYPPAGVYAHPNMATPSPNTAQANPESDGKGTEGKDRNSSKKLKASSSSKAGDNGKVTSGSGNDGATQSDESRSEGTSDTNDENDNHEFAANKKGSFDQMLADGASAQNNPATVNYPTSIHGNPVTVPATNLNIGMDVWNASSAGPGAIQMRPNASGPVIGHEGRINDQWMQDERELKRQKRKQSNRESARRSRLRKQAECEELQRRVEALTNENHSLKDELQGLSEECEKLTSENNSIKEELARWCGPDAVSKLESSGTNATHAQSNVEEAS*
235	Capsicum chinense	CCHI_11	CC.CCv1.2.scaffold271.125		S	Chr02	156578210-156578644	ATGACTTCTCCTGGCGGACCTTCTTCATCAGGGTCAGAGGATCTACAACAACTAATGGATCAAAGGAAGCGCAAAAGAATGATATCGAACAGGGAATCAGCAAGAAGATCAAGAATGAAGAAGCAGACACATTTGAATGAATTAATGGCTCAAGTGAATCAACTCAAGGAACAAAATAACCAAACTGTCACAAACATAAATACGGTCACACAGGTTTATTTGAACGTGGAGGCACAGAATTCTGTTCTCAGAGCACAAATGGCGGAGTTGAGTCATAGGCTTCAGTCTTTAAATGAGATTATAAATTGCATCAACTCAGCAAACTCAACAATTGATGAAACACAGGTTATTGGTGATGATGGTTTCTTGAATCCTTGGAATTTGCTTCATGTTAATCAG…	MTSPGGPSSSGSEDLQQLMDQRKRKRMISNRESARRSRMKKQTHLNELMAQVNQLKEQNNQTVTNINTVTQVYLNVEAQNSVLRAQMAELSHRLQSLNEIINCINSANSTIDETQVIGDDGFLNPWNLLHVNQPIMASADAFMY*
236	Capsicum chinense	CCHI_12	CC.CCv1.2.scaffold734.62		S	Chr02	160751411-160752076	ATGTTGTCCACTTTGTCGGCCACTACTCTGTCCTCCGATGGACTTTTTTCTAATTCATTCGCGGCTTTTGATGGTGGTTTTACTCCTTGGGAATGTATCGAACCGGCTTTTCTATTTCCACGAGATGTGGAAGAAGAAGAAGAGCCGGTTCTTTCTCCCAAGCAATCCCCACCACCTGAACCGGTTTATTTGAACTCCGATTCAGGGTCTGATGACTCCAAACCGAATTCCATTCACTCTAGTTCCGGTTCAGATGAACCGAACCGGAATAATAACAACAACTCGAACCGCTGTCCTGACGAGAGAAAACGCCAGCGTACGACATCGAACCGGGACATAGACGAGAGAAAGCGCCGTCGTATGGTATCGAACCGGGAATCAGCTAGGCGTTCCCGCATG…	MLSTLSATTLSSDGLFSNSFAAFDGGFTPWECIEPAFLFPRDVEEEEEPVLSPKQSPPPEPVYLNSDSGSDDSKPNSIHSSSGSDEPNRNNNNNSNRCPDERKRQRTTSNRDIDERKRRRMVSNRESARRSRMRKQKHLENLRNQVNRLKIGNRELMNRLRLITHQYQIFQCDNERLKTESAILGQRLEDIREILRARQLQQQFNSYFAWPCSNYMEQRPH*
237	Capsicum chinense	CCHI_13	CC.CCv1.2.scaffold559.4		S	Chr02	162922873-162923415	ATGCAACCCACTGATGTCACAGACTTCTACTACCTACTTCCTTCTAACTCAACTCAATTCCCATCTCAATCCTGTGCGAACTATAACACGTCCACATTTCAGCTAAATAGGCTCTTGAACCCTTTATGTCATCTTCAGATCACTCCCCAAGTTCAAGACCTCAATCCACAACTAACATGTTTCAACAGTAACTCTACATCAGACGAAGCTGATGAGCAACAGTTAACTCTAATAAATGAACGTAAACAGAGAAGAATGATATCTAATAGAGAGTCTGCAAGGAGATCACGAATGCGCAAGCAGAGGCACCTAGATGAGCTTTGGGCACAGGTTGTTTGGCTCCGAAATGAGAATCACCAGCTCCTGGACAAACTAAATCATGCTTCTGAGCGTCATGAT…	MQPTDVTDFYYLLPSNSTQFPSQSCANYNTSTFQLNRLLNPLCHLQITPQVQDLNPQLTCFNSNSTSDEADEQQLTLINERKQRRMISNRESARRSRMRKQRHLDELWAQVVWLRNENHQLLDKLNHASERHDQVLQENAQLKNEASELRQMITDMQLSSPCPISRALENEPCSGLPQNE*
238	Capsicum chinense	CCHI_14	CC.CCv1.2.scaffold1160.3		H	Chr03	178389699-178403411	ATGCAAGAGCAAGCGACAAGTTCCATTGCGGCTAGTTCTTTACCTTCAAGTAGTGAGAGATCTTCTAGCTCAGCTCTCCATCTTGAACTCAAAGAAGGCATGGAGAGTGATGATGAGATCAGAAGAGTGCCGGAGATGGGTGGAGAAGCCACCGGAACCACCTCAGCTTCTGGCAGAGATGGAACTTCCGCCGCCGGTCAAGCTCAACCATCAGCTGGGACTCAAAGGAAGAGAGGTAGAAGCCCAGCTGACAAAGAAAACAAGAGGTTAAAAAGGTTGCTGAGAAATAGAGTATCGGCACAGCAAGCAAGGGAGAGGAAGAAAGCATACTTGATAGATCTGGAAGCAAGGGTGAAGGAATTGGAAACAAAGAATGCAGAACTTGAAGAGAGGTTGTCC…	MQEQATSSIAASSLPSSSERSSSSALHLELKEGMESDDEIRRVPEMGGEATGTTSASGRDGTSAAGQAQPSAGTQRKRGRSPADKENKRLKRLLRNRVSAQQARERKKAYLIDLEARVKELETKNAELEERLSTLQNENQMLRHILKNTTAGAQEGRK*
239	Capsicum chinense	CCHI_15	CC.CCv1.2.scaffold857.4		St	Chr03	259016077-259023747	ATGGCTTCCTGCAAGGATGGTAAGTCAGTGATGGATAATGGAAAGTATGTCCGGTATACACCTGAGCAGGTTGAAGCACTTGAGAGGCTTTACCATGATTGTCCTAAACCAAGTTCCATGCGCCGTCAGCAGCTTATTCGAGAATGTCCTATTCTTTCTAACATCGAACCTAAGCAAATCAAAGTTTGGTTTCAGAATCGAAGATGCAGGGAGAAACAGAGGAAAGAGGCCTCAAGGCTTCAGACAGTGAATAGGAAGCTGACGGCAATGAACAAGCTATTAATGGAAGAAAATGACAGATTACAGAAACAAGTTTCTCAATTGGTGTATGAAAATGGCTACTTTCGCAGGCAAACTCACAGTACACCGCTTGCTACAAAAGATACCAGTTGTGAATCA…	MASCKDGKSVMDNGKYVRYTPEQVEALERLYHDCPKPSSMRRQQLIRECPILSNIEPKQIKVWFQNRRCREKQRKEASRLQTVNRKLTAMNKLLMEENDRLQKQVSQLVYENGYFRRQTHSTPLATKDTSCESVVTSGQHHLTSQHPPRDASPAGLLSTAEETLTEFLSKATGTAVEWVQMPGMKPGPDSIGIIAISHGCTGVAARACGLVGLEPTRVSEILKDRPSWFRDCRTVDVINVLPTANGGTIELLYMQLYAPTTLAPARDFWLLRYTTVMDDGSLVVCERSLGNTQNGPSMPPVPNFVRAEILPSGYLIRPCEGGGSIIHIVDHMNLEAWCVPEVLRPLYESSAVLAQKTTVAALRYLRQIAQEVSQTNVTNWGRRPAALRALGQRLSRGFN…
240	Capsicum chinense	CCHI_16	CC.CCv1.2.scaffold145.6		S	Chr04	36948402-36948902	ATGGCTTCTTTTAGTGGAACAACTTCAAGATCAAGCCAAGAAGATCTCCAACAACTAATGGACCAAAGGAAACGCAAAAGATTGATATCAAATAGGGAATCAGCAAGAAGATCAAGAATGAGGAAGCAAAAACATTCTGATGATTTAACAGCTCAAATAAATCAACTTAAGGAACAAAAAAATCAAATTGCAACAAATATTAACATGCTCACATATCTTTTCTTGAATGTGAAAGCGGAAAATTCAATTCTCAGAGCTCAATTGGTTGAGTTAAGCCACAGGCTGCAGTCCCTTAATGAGATGATAAGTTGCCCACACTCTCCATACCTCGAAAAATGTACTACTTTTGAAGGACCTGAAACGTACCCTGCAACCGTTATACAGGGTCCGAGCAACATA…	MASFSGTTSRSSQEDLQQLMDQRKRKRLISNRESARRSRMRKQKHSDDLTAQINQLKEQKNQIATNINMLTYLFLNVKAENSILRAQLVELSHRLQSLNEMISCPHSPYLEKCTTFEGPETYPATVIQGPSNIAFNYHHDLDDFLNPWNLLTVNQPIMASSDSFIY*
241	Capsicum chinense	CCHI_17	CC.CCv1.2.scaffold596.1		S	Chr04	54810279-54812802	ATGAATCATTCGAGCCCGAATTTAGGCTCGGATGATTTGGCTGTAAGTGAGAAAAAGCGAAAGTGTATGATTTTGAACCGCGAATCAGCCAGGCAATCTCGCAAGAGAAAGCAAACACATCTAGTTAACTTGAGGAACCAATCGAACCGGCTTAAAGTCAAAAATCGGGATTTAACGAATCGGGTTCTTATGATAACCGGTCACTGCCAACTTGTCCGGAGAGAGAACGAGATGTTACGAACCGAATCGATTTTACTCCGCCAGAGACTTGAGGGTATACGTGAAATCTTACTCACAAGGGATAGAGAAGATATTGATCCGAGGTCCAAATATGTGATTCCTAAACTAATAGAGAAATTAAGTGAGCTTGAGAGTTTAGTTGAGCCTTCTCAATATATT…	MNHSSPNLGSDDLAVSEKKRKCMILNRESARQSRKRKQTHLVNLRNQSNRLKVKNRDLTNRVLMITGHCQLVRRENEMLRTESILLRQRLEGIREILLTRDREDIDPRSKYVIPKLIEKLSELESLVEPSQYIDNHTSVNEVEKVKLNKFVEEPSHEVDKPKESKDDNYIDMKLEKLEEERIWVCDVQDVSSLWRSS*
242	Capsicum chinense	CCHI_18	CC.CCv1.2.scaffold154.13		E	Chr04	145230088-145232045	ATGGAAAGTTTAAATGGTTCATCAAGCTTGAAAAACTTCTCCTTTTCGAACAAGCAGTTAATCATGGACTCCACTTCTCCCTTCCTCCAGTCCTACGAAGATTCAAATATGGATGGATCAAATTTAAAAGAAAAGTCAACAGAGGGATCGAGTCACCATCATCGGTGTAACTCTGAGAGCTTTCTTATAGAGGAGCAACCTTCTTGGCTTGATGACCTTTTGAATGAACCTGCAGAGACAACGACAGTTGTACACAAAGGTCATCGACGTTCAGCAAGTGACACTTTTGCATACGTAGGAGCAGCTGCAGAGAGGTTAAACACGAGGGAAGAAGCTAAAAATAAGAATGTAAATATAGGAGCTTCTTGGGGTTCAGTCAGCTATGTGAGTTGCAAGGAT…	MESLNGSSSLKNFSFSNKQLIMDSTSPFLQSYEDSNMDGSNLKEKSTEGSSHHHRCNSESFLIEEQPSWLDDLLNEPAETTTVVHKGHRRSASDTFAYVGAAAERLNTREEAKNKNVNIGASWGSVSYVSCKDLSAVPYDTRPNSSHEQKFNKAVQELNGAPSVSNEKHNMREINNSQNQEGSSERSNNAQAKHSMSKADAKRAKQQSAHRSRVRKLQHIAELERTVQALQAEGSELSAELEFLDQQNIILSMENRALRQRLDSLSQEQLIKHLEQEMLERELTRLQTLYQMQRQQLQQQHQQPQQQNHCKHRRNKSRDLEAQCANLSIKNNEASSSRIQVAGSVRM*
243	Capsicum chinense	CCHI_19	CC.CCv1.2.scaffold735.2		I	Chr04	179179806-179185489	ATGGACCCGAAGTTCGCCGGAAAGCCCATACCCGCTCCATTTCTAGCGGGTCGAACTGACCTTGACCAGATGCCCGATACTCCTACCCGTATTGCCCGTCACCGTCGAGCTCAATCGGAGACTTTCTTCCGGTTCCCGGACTTTGACGATGATATTCTACTGGACGACGTCGTTGCTGACTTCAACATCGACATTTCTGCGCCATCGGCTGATACACATATGCAGCAGCCGGCTAATTCGGCTGACTCGTCATCAACCGGACCCCTTTTTGCTGGACCGTCTGGTGGTGATCAAAACCCTAGACCGTTGAATCATTTCCGGAGTCTGTCAGTTGACGCTGACTTTTTTGATGGGTTGGAGTTTGGTGATGTTGGAGCAGCGACAACACCGGCGGCGGCG…	MDPKFAGKPIPAPFLAGRTDLDQMPDTPTRIARHRRAQSETFFRFPDFDDDILLDDVVADFNIDISAPSADTHMQQPANSADSSSTGPLFAGPSGGDQNPRPLNHFRSLSVDADFFDGLEFGDVGAATTPAAAKEEEKWVMGSGSGSGSRHRHSNSMDGSFSTASFEAESSVKKAMAPDRLAELALIDPKRAKRILANRQSAARSKERKIRYTNELERKVQTLQTEATNLSAQITVLQRDNSGLTTENKELKLRLQALEQQAHLRDALNEALREELQRLKIAAGQMTAANGTRGPRPHFPPQPQSFVQCGNLHSQQQQQPQSNTSSQNIGGQTQPSFMNFSNRG*
244	Capsicum chinense	CCHI_20	CC.CCv1.2.scaffold61.39		A	Chr04	185521135-185530811	ATGGCGTCAATGAAGCTGATGTCATCATCGGCGTCGCGGAATTCCGATCGAAGGAAATCGTCTGCTGCGTCGTCGTCTTCGTCGTCGACAATTCCGAATGATATGCAGAATCAGCAGTACTCGAATAACGGGAGTAACAACAGTAGTAATTTGGAGGCGACTTCGATGACGGTTGATGGAATTTTCCCTAATGCGTATGTAGAGAGTCAGGGGATTACGTTACTCGATGCTGCCGGAGCGATAACTGCGATCAGTGATTCCGAGACAGTGCCAGTGACGGCTCCGGTTAGGAGGACGGTGGATGATGTGTGGAGGGAGATTGTGGAAGGTAAGAGGGAACAGCGAAGGGCAGCAATTGCGGGCTGTAAGGAAGAGGCAGTGGATGAAATCATGACGCTG…	MASMKLMSSSASRNSDRRKSSAASSSSSSTIPNDMQNQQYSNNGSNNSSNLEATSMTVDGIFPNAYVESQGITLLDAAGAITAISDSETVPVTAPVRRTVDDVWREIVEGKREQRRAAIAGCKEEAVDEIMTLEDFLVKAGAVEEESVAMQGPVQGEVKVELGTERLSGGIFAYDAPYMATPQQSVQGFGNGMEVIGGGRGKRKAILEPLDKAALQRQRRMIKNRESAARSRERKQAYQVELESIAVRLEEENEQLLKEKEERTRAHYKQLIEKVIPIVEKRKPPRVLRRVCSMQW*
245	Capsicum chinense	CCHI_21	CC.CCv1.2.scaffold188.25		D	Chr04	199559441-199562666	ATGATCATGACTTCTCCAACAACTCAATTTGCCCCCACAAGAAGGATGAGCATATATGAACCATTTCACCAGATGAGTGTGTGGGAAGACGCGTTTAGAGGTGACATTGTGCCTAGCGTTGATGCATCTATGATTTCACAGCCAAACGACAGGCCAGATGACAAGTCAGGGTATACATCCGGTGAACAACATATACCCTTTGGCTCTGGAGACAATCAAGCACTGAGGAGGAGTGAGAAGGTACAGCGACGTTTAGCACAAAATCGTGAAGCTGCCCGTAAAAGCCGTATGCGGAAAAAGGCGTATGTTCAGCAGCTGGAAACCAGCCGTTTAAAGCTGGCCCAACTCGAATTGGAGCTTGAGAGAGCTAGACAGCAGGGATTATACATGTTAGGTTCA…	MIMTSPTTQFAPTRRMSIYEPFHQMSVWEDAFRGDIVPSVDASMISQPNDRPDDKSGYTSGEQHIPFGSGDNQALRRSEKVQRRLAQNREAARKSRMRKKAYVQQLETSRLKLAQLELELERARQQGLYMLGSNSNMGILGTINPGIAAFEIEYSHWVEEQQKKNAELRSILQSPVSDMELQLLVENVLSHYFNLFRMKADAAKADVFYLMSGMWRTSVERFFLWIGGFKPSELINVVMPQLEPLTDEQIIKVCKLRHCCQQAEDALTQGMDKLHQTLAQSILNMNTGAGNYASQMVSSMENLEALESFVNQADHLRQQTLQQMSIILTTRQAARGLLAFGEYLQRLRALSSLWAARPREPT*
246	Capsicum chinense	CCHI_22	CC.CCv1.2.scaffold1231.17		S	Chr04	221979456-221979881	ATGATGTTTGAAGATCCGGTTCACTACCATCTCCCGGTTCATGAAGATGTTGTTCTTTCACCTAGTGATATCGATGAAATATTATCTCTTTTACAACCCGAGCTCCCGGTTCATGAGTCTACATCCGGTTCAGAAACAACCCGGTTGGTCTTTTCCTTAGAAGAACGTAAGCGACGTCGAAAGATATCGAACCGGGAGTCAGCACGCCGGTCCAGATTCCGTCAGAAAAAACACGTAGATAATCTTACGGAACAAGTAGACCGGCTTAAAGTCGAGAACCGGGAGTTAAAAAACCGGTTATGTGTAGTTACTCATCATTGTCAAGCGGCTCAAAGTGAAACGGACCGGCTTATTCTCGAGTCAATTGTACTTCAACAACAACTAGCCGGTTTATGTCAA…	MMFEDPVHYHLPVHEDVVLSPSDIDEILSLLQPELPVHESTSGSETTRLVFSLEERKRRRKISNRESARRSRFRQKKHVDNLTEQVDRLKVENRELKNRLCVVTHHCQAAQSETDRLILESIVLQQQLAGLCQILNPMQLQ*
247	Capsicum chinense	CCHI_23	CC.CCv1.2.scaffold622.67		A	Chr04	225712804-225716676	ATGGGGAGTAATTATAATTTCAAGAACTTTGGAAATGAGCCACCAGGGGAGGGTGGAAGTGGTGGTTGTGGAAAGCAGCCGGGGAACTTTCAGTTGCCGCGGCAGTCATCTATCTATTCGTTGACGTTTGACGAGTTTTTGAGCTCAACAGGAGGAATTGGAAAGGATTTTGGGTCAATGAACATGGATGAGTTGCTGAAGAATATATGGAGTGCTGAGGAGAGTCAAACTATGGGAGGTACTGGGATTGGTGGGCAAGAGGTTGGTGTTTCAGGTGGGCATTTGCAGAGGCAAGGCTCTTTGACTTTACCTAGGACACTGAGTCAGAAGACTGTTGATGAAGTTTGGAGGGATATGTCAAAGGAGCATGGTGGTGGTGGTGGTGGTGGAAAGGATGGA…	MGSNYNFKNFGNEPPGEGGSGGCGKQPGNFQLPRQSSIYSLTFDEFLSSTGGIGKDFGSMNMDELLKNIWSAEESQTMGGTGIGGQEVGVSGGHLQRQGSLTLPRTLSQKTVDEVWRDMSKEHGGGGGGGKDGNSIGVPPNMPQRQQTLGEITLEEFLVRAGVVREDAQLAAKSNNAGGIFADLSYAGNNTGLAFGYQQPNRNTGLMAGSIPNKNGESVIQSANLPLNVNGVRSTQQQLRPQQLQQNQQPQPQPQPQPQQQPIFPKQPALPYGAAMAVPNSVQMGSPGLRAGMAGIADPALNSNFIQGANLMGGGMNMVGLGAGGVTVATASPGVSSDGLGKSNGDTPSVSPVPYVFNGGLRGRKYSTVEKVVERRQRRMIKNRESAARSRARKQAYTM…
248	Capsicum chinense	CCHI_24	CC.CCv1.2.scaffold1445.17		K	Chr04	229710583-229712687	ATGGTAGATAACATCGATGATATCGTTGCGCACATCAACTGGGACGATGTAGATCACATCTTCCACAACGTTCTACACGATGATCTCTTCACTGTTCATGATCCCGATCCCGATCCCTCTGCACCCAATTTCCAGGATATCGAGCAGCTTCTCATGAACGACGACGATGTTGAAGATCAAGCTGATACTCAATTTGCGGCCGAATTTCTCTCTGATGTGCTGGTTGATTCACCTGCTCAGTCCCATCAATCTCCCTCTGCTGAAGAAGAAGCCTTTGGATTCCCCGATTCCAAGGTTTCTAGTGGATCCGAGGACGACAAGGACAAGGTCTCTCACTCGCCCTCTGACGCTGACGAACTGAACAACGATGACCCCATAGATAAGAAGCGAAAGAGGCAA…	MVDNIDDIVAHINWDDVDHIFHNVLHDDLFTVHDPDPDPSAPNFQDIEQLLMNDDDVEDQADTQFAAEFLSDVLVDSPAQSHQSPSAEEEAFGFPDSKVSSGSEDDKDKVSHSPSDADELNNDDPIDKKRKRQLRNRDAAVRSRERRKLYVRDLELKSKYFESECKRLGFVLQCCLAENQALRFSLQNSSANGVSMTKQESAVLLLESLLLGSLLWFLGITCLLILPSQTWSIPEENQGSRNPGLLVPIKRGKKTSRSLAFLSFMMGKRCKASRSRMKFNPHSLGIVM*
249	Capsicum chinense	CCHI_25	CC.CCv1.2.scaffold922.8		I	Chr04	231530225-231533588	ATGGCTCAGTCTAATTCTAAGCCACCTATGAGTAGCCATAATTTTGGTGTGGGAGGTTCGCATGTGAGGTCTTTATCTCAACCAGGGATTTTTTCGAATAGCTGTTTGCCCCCATTGAGTCCTTTGCCGCCTCCCAGTGAGTCTTCGATGGCGTTGGTTCAGTCTAGCTTGAAGGATACATCTATGGAGCAAGTAGATGTGAATTCCAAAGGTGTAGGAGTTGTGTCTTCCTTTACAAGGGATGGTCTTCCTCCGAGGAAGGGGCATCGTCGATCTAATAGTGATGTTCCATTGGGATTTTCGGCTATGATTCAGTCTTCACCTCAGTTGATGCCTATAGGTGTCCAGAAAGTTTTTGGGAGAGCAGTGAGTCTTGGGGATAGCTTGGGGAGGGATAAA…	MAQSNSKPPMSSHNFGVGGSHVRSLSQPGIFSNSCLPPLSPLPPPSESSMALVQSSLKDTSMEQVDVNSKGVGVVSSFTRDGLPPRKGHRRSNSDVPLGFSAMIQSSPQLMPIGVQKVFGRAVSLGDSLGRDKFTSRNGKIDGEEIGERKPKGEITDELLFSYMNLDNIDALNSSGTEDRDKDSMVSGTKVSGCDSSNNEAESVLKGNTVSIQPTGLREGSKRSADANIAPAARHFRSLSMDSAIGIFHYGDESPNLPNSLVMRSGQLSPSNSGNESSSKHNFDFGNAEFSEAEMKKIMADERLAEIAVSDPKRAKRILANRLSAARSKERKLRYISELEHKVQKLQSEATTLSTQVTILQKDLVEISSLNSELKFRIQSMEQQAQLRDALHESLTAEV…
250	Capsicum chinense	CCHI_26	CC.CCv1.2.scaffold403.60		D	Chr05	8753902-8758790	ATGAATTCTTCAACATACACTCAGTTCGTTGCCTCAAGAAGGATGGGTATATGCGAGCCACTACATCAAATTGGCATGTGGGATGATTTCAATGCCAGTTGCCCGAGTACATCGGCAACAATGATTCTCGAAGTTGAGAAATGCCTAGAGGAGCAGATACCTATTATGGAGAAAAGATTAGACAATGAGATAGAAGATACTTCGCATGGAACAGTAGGGGCTTCTAATAGATATGAAGCAGAAACAAGTAAACCCATCGAGAAGGTACTTCGACGTCTTGCACAAAACCGTGAGGCTGCTCGTAAAAGCCGTTTGCGGAAGAAGGCCTATGTTCAACAGTTAGAAAATAGTAAATTGAAGCTGATTCAATTGGAACAAGAACTAGAACGGGCCAGAAAA…	MNSSTYTQFVASRRMGICEPLHQIGMWDDFNASCPSTSATMILEVEKCLEEQIPIMEKRLDNEIEDTSHGTVGASNRYEAETSKPIEKVLRRLAQNREAARKSRLRKKAYVQQLENSKLKLIQLEQELERARKQGLYVGGGLDASQLSYSGTASSGTAAFDTEYGQWVEEQNRQTNDLRNALYHSQISEADLRVIVDGCLNHYSNLFRIKATAAKDDVLYIMSGMWKTSAERFFMWIGGFRPSELLKVLTPHLQLLTEQQLREVCNLTQSCQQAEDALSQGMVKLHQILAEAIAAGRLGEGNYSLPQMGPAIEKLEALVRFVNQADHLRQETLQQMSRILNTHQAAQGFLALGEYFERLRVLSSQWATRLREPA*
251	Capsicum chinense	CCHI_27	CC.CCv1.2.scaffold17.4		S	Chr05	60223748-60224353	ATGATTTCATCAGAGGCTGCAAAAATCCACTACTTAGCACAAGAAAACCCCTCATCAATTCCTATTGATTACAGCTTCATGCACAAAACCTTACCAGCATTCCAGTTCAGCAGCACATTCTTGACCAATAACAACATACAAAATTATCAGGCCTCTTTTCCTTTTCAAGATTTCAGTACACAGCCATCATGCATCAGCAGTAACTCGACCTCTGATGAGTCAGAGGAACACCAGCATAGAATCATCGATGAACGAAAGCAGAGGAGAATGATTTCTAACAGGGAATCAGCTAGAAGATCAAGGATGAGGAAGCTGAGGCACCTTGATGAACTCTGGTCCCAAGTGCTTCGTCTTCGAACAGAGAACCACAATCTGATCAATAAGTTAAATCAAGTCGCA…	MISSEAAKIHYLAQENPSSIPIDYSFMHKTLPAFQFSSTFLTNNNIQNYQASFPFQDFSTQPSCISSNSTSDESEEHQHRIIDERKQRRMISNRESARRSRMRKLRHLDELWSQVLRLRTENHNLINKLNQVAESHEKVVEENMQLKEEASDLRRLLTDIQLASSFDAFSELDEVPCNTADHLKATNPPHRNFYSSASLKL*
252	Capsicum chinense	CCHI_28	CC.CCv1.2.scaffold1019.18		S	Chr06	121522-121956	ATGACTTTGACTCCACAATCCGTGAGTTCTGGTTCGGATGCTGATCCGAGGTATGTAAAGTTTGATGAAAGGAAAAGGAAGAGAATGGAATCCAACCGCCAGTCGGCCAAGAGGTCACGGATGAGGAAGCAGCAGCGTTTGGAGGAGTTAAAGAGCGAAACAACTCAGCTGCAGAACCAGAACAGTATCTGCCGCGATAAGATTGATTCTGTCGAAAGGAAGTATCATTCCGTTGACACTGAGAACAACGTGTTGAGGGCTCAACTCGCAGAACTGACTGAACGGTTGAATTCGCTGAACGAACTCACTCAATTCTGGGCTGATACTACTGGATTTCCTGTCGACGTTGCTGAAATTCCCGACATTTTGCTGGAGCCGTGGCAACTGCCGTGCCCAACT…	MTLTPQSVSSGSDADPRYVKFDERKRKRMESNRQSAKRSRMRKQQRLEELKSETTQLQNQNSICRDKIDSVERKYHSVDTENNVLRAQLAELTERLNSLNELTQFWADTTGFPVDVAEIPDILLEPWQLPCPTHAIAASDMFQF*
253	Capsicum chinense	CCHI_29	CC.CCv1.2.scaffold1.53		I	Chr06	61895063-61900421	ATGCAAGATCCGTCAAATCCAAACTCGATGCAACTGAATCAAACGCCGTCACTTTCCGCCACATTCAGGCCATCTCACCACCGCAGAGCTCACTCGGAGGTTAACTTCCGTCTGCCCGAGGATCTAGATCTGGTATCTGACCCATTCGATGCCTCCGCCGCAAGTTTTGAGGAGATCGGATCTGAGGATGATTTCTTCTCCACTTACATGGACATTGAAAAGCTCGGCACTGGATCTAACCCTACTGATGTTCCAGGATTCAACAATGCTGCTGCTGGAAGTAGTGGTGGACTGGTAGTTGACTGTGGTGATGGAGAGAAGAGTTTTACTAGGCCTCGTCACAGGCATAGCAATTCCGTGGATAGTTCGAGCTTGTTGTTAAGTGAGAGTATTGAAGCT…	MQDPSNPNSMQLNQTPSLSATFRPSHHRRAHSEVNFRLPEDLDLVSDPFDASAASFEEIGSEDDFFSTYMDIEKLGTGSNPTDVPGFNNAAAGSSGGLVVDCGDGEKSFTRPRHRHSNSVDSSSLLLSESIEAKKAMAPDKLAELWTIDPKRAKRILANRQSASRSKERKARYITELERKVQTLQTEATTLSAQLTLFQRDTTQFTNENTELKLRLQAMAQQAQLRDALNEALKQEVERLKMATGELSSSDAYNLGMQHIPYNQSAFFSHQLQSGPNESQNIQMQQFHSLQDSLLAPHRRLPAGHVQALPDTMQQDPLGRFQGLEIGGRGMHLVKTEAPSISASESSSTL*
254	Capsicum chinense	CCHI_30	CC.CCv1.2.scaffold45.2		I	Chr06	63399553-63414738	ATGCAAGGTCCGTCAAATCTAAATTCCGTCAAGTTACCGAATCAACCGACGTCATTTTCAGAAGCATTCCGTCCATCTCACCACCGCCGAGCTCACTCCGAGGTGAACTTCCGGTTGCCGGAGGATCTAGATCTGGTCTCCGACCCATTCGATGTGCCGGCAGGAAGTTTCGAGGAGATGGGATCGGAGGATGATTTCTTCTCTACCTACATGGACATTGAGAAGCACACCGGTGGATCTAACCTCGGCGATGCTACTGGTCTCGACAATGCTGGCGCAGGAGGGAGTCAAGTGGGAGCTGAGACTAGTGACGGGGAGAAGAGCATGATGAGGCCACGTCATAGGCATAGTAATTCTGTAGATATCTCAAGTTTATTGCTCAGTGAGAGTATTGAAGCT…	MQGPSNLNSVKLPNQPTSFSEAFRPSHHRRAHSEVNFRLPEDLDLVSDPFDVPAGSFEEMGSEDDFFSTYMDIEKHTGGSNLGDATGLDNAGAGGSQVGAETSDGEKSMMRPRHRHSNSVDISSLLLSESIEAKKAMAPDKLTELWTIDPKRAKRILANRQSAARSKERKARYISELERKVQTLQTEATTLSAQLTLIQRDTAGLTNENTELKLRLQAMEKQAQLRDALNEALKQEVERLKIATGQISASSDAYNSGMQQIPYNRPAFFPHQPQPGPSESQNIQMPQFHHIQGSMSNPRHPLHAGHAQALANAMQQDPLSRFQGLDISSRGSHLVKTEAPSISASQSSSTF*
255	Capsicum chinense	CCHI_31	CC.CCv1.2.scaffold2.10		I	Chr06	135813194-135823538	ATGGATAAGGATAAGTCTTCGTTGCCTCCATCGGGGAGATACTCATTATTTTCACATCCTGGTAGTAGTTCCAATGTAAAGTCGGAACAACCTGGATTAGTAAATTTACCTCCCTTAGGACCTGGAAATGCTTCAGAATCGGGTCATTGTGGTCATGGTTTGTCGGTGGAGTCAAGCCTATTTAGTAATGATATAAGCCGAATGTCTGATAACCCACCTAGAAAATTTGGTCACCGACGTGCCCACTCAGAAATTCTTACTCTTCCTGATGATATTAGCTTTGATAGTGATCTTGGTGTTGTTGGACTAGATGGACCGTCTCTGTCAGACGAGACTGAGGAAGACATCTTCTCAATGTACCTTGACATGGATAAGCTCAATTCTTCATCGTTGTCTTCT…	MDKDKSSLPPSGRYSLFSHPGSSSNVKSEQPGLVNLPPLGPGNASESGHCGHGLSVESSLFSNDISRMSDNPPRKFGHRRAHSEILTLPDDISFDSDLGVVGLDGPSLSDETEEDIFSMYLDMDKLNSSSLSSDFQVGESSSAAAASGSSQTQGMTSGTNKVAPTVSEKPRVRHQHSQSMDGSTTIKPEMLMSGVEEPSSAETKKATSAAKLAELALIDPKRAKRIWANRQSAARSKERKMRYIAELERKVQTLQTEATTLSAQLTLLQRDTSGLTAENSELKLRLQTMEQQVHLQDALNDALKEEIQHLKVLTGQGMANGGPMMNFPASFGGNQQFYSNNQAMHTLLAAQQLQQLQIHSHKQQHQFQQHQLHQFQQQQQQLQHQQQQPLIQQQEPLSQ…
256	Capsicum chinense	CCHI_32	CC.CCv1.2.scaffold215.38		I	Chr06	186518425-186525095	ATGGACCCTAAGTTCGCCGGAAAGCCCATTCAGGCCCAATTCTATTCGGGTCAAACTGACCTGGACCAGATGCAAGACACTCCAACACGAGCCCGGCACCGCCGTACCCAATCGGAAACCTTCTTCCGTTTCCCCAGCTTCGACGATGACATGCTTTTAGACGATGTCGTTTCCGACTTCAGCCTCGATGCTGTTCGAGCTCCTACACTCATGCAACCTGCGAATTCACCCGATTCTTCCTCCACTGGACCGGGTGATAACCCTAATAAACCGCTATCTCATTATCGGAGTTTATCTGTTGATGCTGATTTTTTTGACGGACTGGATTTTGGTCCTGCCTCAATTGAGAAGAAGATGGTGATGGGTTCTGGACCGCGTCATGGACATAGCAATTCCATG…	MDPKFAGKPIQAQFYSGQTDLDQMQDTPTRARHRRTQSETFFRFPSFDDDMLLDDVVSDFSLDAVRAPTLMQPANSPDSSSTGPGDNPNKPLSHYRSLSVDADFFDGLDFGPASIEKKMVMGSGPRHGHSNSMDGSFDTTSFESESVSVKKAMAPDKLAELSLIDPKRAKRILANRQSAARSKERKNRYTSELERKVQTLQTEATTLSAQITVLQRDTFGLNAENKELKLRLQALEQQAHLRDALNETLREELQRLKIEAGQIPAANGNRGTRPHLPPHPQSFAQCGNHHAQQQQIPRPTTSNQTVPGQSPNSFFNFNRA*
257	Capsicum chinense	CCHI_33	CC.CCv1.2.scaffold31.2		D	Chr06	228670447-228675871	ATGGCTAGTCAAGGAATAGGAGGGACTGGTTTGACAGACTCTGGACCATCATCACATTCACACCATAACCACAATATGCCATATGCTGTTTATAGGGGGATAAATCCTGCTAGCGCAAGTTTCATTAATCAAGAAAGTTCTGGTTTTGATTTTGGAGAGCTAGAAGAAGCTTTTGTACTACAAGGATTTAAGATTAGTAATGATGAAGCTAAAGCATCTTTATATGCAGCAGCAGCAGCCACAGGGAAACCTGCTGCAACTCTGGAGATGTTCCCTTCTTGGCCTATGAGATTCCAACAGACCCCAAGAGAGAAGTCAAAATCAAGAGAAGAGAGTACTGATTCTGGTTCACTTTCAAGTAGAGTTCAACCCCATTTAGAGCCAGAATCACCCATCAGT…	MASQGIGGTGLTDSGPSSHSHHNHNMPYAVYRGINPASASFINQESSGFDFGELEEAFVLQGFKISNDEAKASLYAAAAATGKPAATLEMFPSWPMRFQQTPREKSKSREESTDSGSLSSRVQPHLEPESPISRKASLDHQQNQLHITHKSQEQQQQLQNMASNNPRTGGLQTEQAASKSNSEKKKGAASTSERVLDPKTLRRLAQNREAAKKSRIRKKAYVQQLETSRMRLSQLEQELQRASSQGIFLGGGTTAGSNISSGAAIFDMEYSRWLDDDQRHMSELRTALQAHLSDGDLRLIVDGYIAHYDEIFCLKGVAAKSDVFHLITGMWTTPAERCFLWMGGFRPSELIKMLIGQLDPLTEQQVVGIYSLQQSSQQAEDALSQGLEQLQQSLIDTIA…
258	Capsicum chinense	CCHI_34	CC.CCv1.2.scaffold806.12		M	Chr06	244852918-244855004	ATGAAAGACGAACAAAAAAGATCTGATGAGCTCAACTTGAATTTGAGCCTCACAACTCCCGGAGAAGCTGAATCAGTTGATAAGATTCAAACTCTGGATGAAGCAATGGCTTTTGAACTCAAGCACCATGAAGACCTCAGTCTTGCTGATGAGAAGAAGTTGAGAAGGAGAATATCAAATAAATTGGCTGCTCGAAGAAGTAGGTTCAGGAAGCTCACTCACAAAAACAAATTGGAACAAAACTTCAAAGATCTTCAGGATGAAATAGCTCTGGTGGGATCAAAAATAAAAAATATGAAAAATTATAATGATAAGTTGCGGGTGGAGAATGAAATGTTGCGAGAACGATTAAATAACATCACTGACAAAGCCACTCAAGCAACTGCAAAAATTGAAGAA…	MKDEQKRSDELNLNLSLTTPGEAESVDKIQTLDEAMAFELKHHEDLSLADEKKLRRRISNKLAARRSRFRKLTHKNKLEQNFKDLQDEIALVGSKIKNMKNYNDKLRVENEMLRERLNNITDKATQATAKIEEVKLELQMLKMNLAKAQEYQHYMKIGGESFDFYNHDELESAPEIDINQYLNLDDDM*
259	Capsicum chinense	CCHI_35	CC.CCv1.2.scaffold806.13		M	Chr06	244911044-244913717	ATGAAGAGAAAACAAAACAAATCTGAAGAACCTAACTTGGATTTGTGCCTCATAACGCCAGTTGCAGTTGATCCAATTAACAAGATTTCTACCCTTGAAGACGCAGCGAAATCTGAACTTAGCCAAGGTCATGGAGACCCCAATGTTGATGTGAAGAAGTTGAGAAGAACTATAGCAAAAAAACTAGCTGGACAAAGATCCCGAGCCAAGAAGGTTGAATACATTGCTAATTTAGAAAAGAAGGTCAAAGCTCTCCAGAATAGGATAGCTGTGGAGACAATAGAAGAAGTATATATGAAAGACTATAAAGAACATTTGCAGATGGAGAATGAAATGTTGCGCAAACGAGTGGATAGCGTTATTGACTATATCAATCGACAATCTGCACAAACTGAAGAG…	MKRKQNKSEEPNLDLCLITPVAVDPINKISTLEDAAKSELSQGHGDPNVDVKKLRRTIAKKLAGQRSRAKKVEYIANLEKKVKALQNRIAVETIEEVYMKDYKEHLQMENEMLRKRVDSVIDYINRQSAQTEELKFELKRQKLAKAQEEHMKGESFNFYDYDKAKLAQEIDMNNDINTDQYVNYDDMNVDRPKNDM*
260	Capsicum chinense	CCHI_36	CC.CCv1.2.scaffold806.15		M	Chr06	244955386-244957517	ATGAAGAGAAAACAAAACAAATCTGAAGAACCTAACTTGGATTTGTGCCTCAGAACGCCAACTGCAGTTGATCAAATTAACACGACTTCTACCCTCGACGAAGCAGTGAATTATGAACTTAGCCAAAGTCATGGAAACCCTAATGTTGATGTGAAGAAATTGAGAAGAACTATAACAAATAGACTCTCTGCACAAAGATCCAGGACCAAGCAGGTTGAATACATTGCTGATTTAGAAAAGAAGGTCAAAGATCTCCAGAATAGGATAGTTGTGGAGGGACCAGAAAAAAAATATATGGAAGACTATAAAGAACAGTTGCAAATGGAGAATGAAATGTTACAAAAACGAATGGATAGCGTCACTGACTATATGAATCGACAATCTGCACAAATTGAAGAG…	MKRKQNKSEEPNLDLCLRTPTAVDQINTTSTLDEAVNYELSQSHGNPNVDVKKLRRTITNRLSAQRSRTKQVEYIADLEKKVKDLQNRIVVEGPEKKYMEDYKEQLQMENEMLQKRMDSVTDYMNRQSAQIEELELELKKLKLAKAQKESI*
261	Capsicum chinense	CCHI_37	CC.CCv1.2.scaffold861.5		E	Chr07	210791618-210794353	ATGGCACATTTACCTCCTAGAGTGCCAATGCCACAAAATTGGCCTGATTTTTCAGCACACCAAAAAACCGAAACAATCACCACTGCTAGTCATCACCATAACCCGTCATGGGTAGATGAATTCCTCGACTTCTCCTCATCAAAACGAGGGTCTCATAGGAGATCCATAAGCGATTCCATCGCGTTCCTTGAAGCACCAATGGTCGAAGAATGCCGAATCAGGCTATCAAGTTCGGGCGCGCCTGAATTCGAACGATTTGATGATGAACAACTTATGTCTATGTTTAACGATGATATTAATGCTGTAGAAAACAACTCTAATCCTTCGTCGCCTTCAGATCATAACAGCATTGTTCACGAAGATAAGAAAATGCAGTTGTCTACGGACGAGCAGCAGCAG…	MAHLPPRVPMPQNWPDFSAHQKTETITTASHHHNPSWVDEFLDFSSSKRGSHRRSISDSIAFLEAPMVEECRIRLSSSGAPEFERFDDEQLMSMFNDDINAVENNSNPSSPSDHNSIVHEDKKMQLSTDEQQQKQQLLKVEPEEVESSCKSDNEQTAADQHVNVDTSSEKIVDPKRIKRILANRQSAQRSRVRKLQYISELERSVTTLQAEVSVLSPRVAFLDHQRLVLNVDNSVLKQRIAALAQDKIFKDAHQEALKREIERLREIYYQQNLKKLENDDDDQPTKTQTAAAADANGSEKKEQLVN*
262	Capsicum chinense	CCHI_38	CC.CCv1.2.scaffold157.49		E	Chr07	219969973-219973297	ATGGCTCAACTACCACCTAAAGTTCCCACCATGGCACATAATTGGCCATTCCAAAACATGCCCCCATTGCCTAATTCTACGACCATCACTATCAACCACCATACTAACAATAATTCCTGGGTCGATGATTTCCTAGATTTCTCGTCGGCCCGGAGAAATTCGCACCGTAGATCAGTTAGCGACCCGATTGCATTCGTGGAGGGTCCGTTTCTCCAACAATGCCCGGTCGCTGGATCGAATATCGGGTTCGATAAATTAGACGATGAACAACTTACTACAATGTTTTCTGATGAATTAGCCAACAACGCACCCACAAGTACGAATTCATCTACACCGTCTGATCAAGTAAGTGAAAATGACGATCAGAAATCAACGGTCCTACCAACAGTTGATGTTAAT…	MAQLPPKVPTMAHNWPFQNMPPLPNSTTITINHHTNNNSWVDDFLDFSSARRNSHRRSVSDPIAFVEGPFLQQCPVAGSNIGFDKLDDEQLTTMFSDELANNAPTSTNSSTPSDQVSENDDQKSTVLPTVDVNQVVVQPKDEPGEVDDSDNNNNQLSPSANKNAANDNSDNTNCIVDPKRIKRILANRQSAQRSRVRKLHYISELERSVTTLQTEVSALSPRVAFLDHQRLLLNVDNSALRQRIAALAQDKIFKDAHQEALKKEIERLRQIYHEQNMKKISNTATADAPPSAVAPMSCTEEE*
263	Capsicum chinense	CCHI_39	CC.CCv1.2.scaffold607.10		G	Chr08	13258219-13270677	ATGGGTAGCGGTGAGATGGATAAATCCTCAAAAGAGGCGAAGGAAGCAAAAGAGTCGAAGACTCCCAATTCGCAGGAGCAGACTTCTACTCCTACCGCTGGCCCAGTCAATCCAGATTGGTCTGGCTTTCAGGCATATTCTCCTATGCCTCCACATGGGTTTATGACATCAAGTCCTCAAGCACCACACCCCTATATGTGGGGAGTCCAGCAATTTATGCCACCCTATGGTACTCCACCACATCCATACGTTGCAATGTATCCCCATGGTGGTATATATGCTCATCCATCTATGCCTCCGGGATCTTACCCTTTCAGTCCTTTTGCAATGCCTTCTCCAAATGGCGTTGCTGAAGCTTCAGTTAGCAACCCTGGTAATGTCGAAGTGGACGGTAAGTCG…	MGSGEMDKSSKEAKEAKESKTPNSQEQTSTPTAGPVNPDWSGFQAYSPMPPHGFMTSSPQAPHPYMWGVQQFMPPYGTPPHPYVAMYPHGGIYAHPSMPPGSYPFSPFAMPSPNGVAEASVSNPGNVEVDGKSSEGKEKLPIKRSRGSLGSLNMITGKNNGPGKTSGASANGVHSKSAESGSEGSSEGSDAHSQNESPMNSGGRQDSADTSQNGNAAHGSQNGGTAATHSTINQTMAIVSAPGAGGITGPATNLNIGMDYWGAATSSPIPAMHGRVPVSVAGGLVTAGSRDSVQSQMWIQDERELKRQKRKQSNRESARRSRLRKQAECDELAQRAEVLKEENAALRAEVNHIRSDYEHLLAQNASLKERLGEVPGEEVPRTGQDDHHSSQTESHQGDQ*
264	Capsicum chinense	CCHI_40	CC.CCv1.2.scaffold1536.3		C	Chr08	18864717-18873690	ATGGAAAAGAAAATGGCTAATTTTGCTAGTAGAAACATGAAGAAAAGTCCTTCTATATTGGCTATGGAAGAATTTTATGGACAAGATGCAAAAATTAGTGATGGTTTTGGAGCAAGTGATCATCATCATCAACAACAAAGTACCAATAATAATAATAACATTAATCATCATGACAACAACAACAATAACAACAACAATGGTCATCATCATGCTCAACTTTTTGGTGATATTTGTTCTATTGATCCCTCATTTACTATGAGAAATCAGGACATATTAAATGGTTTCTCATATTGTGGAATGACAGAAAGGCCCCTTTGGTCTCCAAATATTACTCCCAAGCAATCCAGTATATCTGTTACTGTGGATTCACAATCTTCAATATGTGCTGGGAGTCCAACA…	MEKKMANFASRNMKKSPSILAMEEFYGQDAKISDGFGASDHHHQQQSTNNNNNINHHDNNNNNNNNGHHHAQLFGDICSIDPSFTMRNQDILNGFSYCGMTERPLWSPNITPKQSSISVTVDSQSSICAGSPTPTIIMPPKARDNQTMGANSGSYQSDDDDVDGEVGPCEQSTDPLDIKRIRRQASNRESARRSRRRKQAHMADLENQVDQFRGENESLFKQLADATQQYKDALTNNRVLKSDVEALRAKVKLAEDMVARGSLTSSLSHLLQNYLNTPQSLGATTTTTNNNNTMCRLDNVSPTITVPGEDSWGVISSQNSMIGVDNNNNVNAFNQNGAMSDTVSCVSDVWSWE*
265	Capsicum chinense	CCHI_41	CCHI_bZIP.Chr08.1		St	Chr08	110089580-110091443	ATGGCGGTGACATCAAGCTGTAAAGACAAACTGGGGATGGATAGTGGTAAATATGTGAGGTACACCCCTGAGCAAGTAGAGGCTTTGGAGAGGTTATATCATGAATGTCCAAAACCCAGTTCCCTTCGTCGTCAGCAGCTCATTCGGGAGTGTCCAATTCTGTCCAACATCGAGCCAAAACAGATCAAAGTTTGGTTCCAGAACAGAAGGTGTAGAGAGAAGCAACGTAAAGAATCATCGCGCCTTCAAGCTGTGAATAGAAAATTGACAGCAATGAATAAGCTGTTGATGGAAGAGAATGATAGGCTGCAGAAGCAAGTTTCACAGTTGGTGTATGAGAATAGCTTTTTCCGCCAACAGACTCAAACTGCAGCCCTTCCTGCCACAGACAACAATAGT…	MAVTSSCKDKLGMDSGKYVRYTPEQVEALERLYHECPKPSSLRRQQLIRECPILSNIEPKQIKVWFQNRRCREKQRKESSRLQAVNRKLTAMNKLLMEENDRLQKQVSQLVYENSFFRQQTQTAALPATDNNSCESVVTSGQHNLTPQRPPRDASPAGLLSLAEETLTEFLSKATGTAVEWVQMPGMKPGPDSIGIIAISHGCSGVASRACGLVGLEPTRVSFT*
266	Capsicum chinense	CCHI_42	CCHI_bZIP.Chr08.2		C	Chr08	123802218-123828148	ATGGATAGCGTGTTTTCGGTGGACGACATTGCCGATCAATTATGGTCATCGCCGCCGCCGATGCGTTTATCTCATGACTTGGATTCTTCTACCTCTGCCACTTCGTCGTCGAAGATGATGAACAGGAGCTCGTCGGAGTGGGCTTTTCAGCGTTTCCTTGAGGAAGCCGATACTACTTCTCAGCAGATCAAGGATCATAATTTAATTGCTGATCAATCCGAGCCTGTGTCTAATACCGCATCGTTTGCCTCTGAACCTCCTTCCAATATTCCGATTGATTCCGATGAGTACCAGGCTTTCCTCAAAAGACGTCTTGATTTGGCGTGTGCTGTCTTTGCTTTGACTCGTGCAAACTATGTAAGATCTCAAGATTCGGCTTCTTTGCCACCCGAAAAAGGA…	MDSVFSVDDIADQLWSSPPPMRLSHDLDSSTSATSSSKMMNRSSSEWAFQRFLEEADTTSQQIKDHNLIADQSEPVSNTASFASEPPSNIPIDSDEYQAFLKRRLDLACAVFALTRANYVRSQDSASLPPEKGSLAANASVSASQVPPRGFGQELTKVQDKDAAEPVGIPPLPAVRKKPGMQVRSTTSGSSGEQSDDDEAEGEAETIQSTDPTDVKRVRRMLSNRESARRSRRRKQAHLTELETQACFWVMLSVIENSSLLKRLTDISQKHNEAAVDNRVLKADVETLRAKVKMAEETVKRVTGLNPLFQAMTEISTIMLPSFTGSPFDSSADAGVPEQDDLKCHYYPAPDNSHMPNHDSRMQNAMLDI
267	Capsicum chinense	CCHI_43	CC.CCv1.2.scaffold1082.7		G	Chr08	167630106-167633691	ATGGGAAACAGTGAGGATGGGAAATCCTGTAAGCTTGAGAAACCCTCTTCCCCTGCACCGGACCAGAGCAATCTCCATGTCTATCCTGATTGGGCGGCCATGCAGGCATATTATGGTCCTCGAGTAGCTGTACCTGCATATTTCAATTCAGCTGTTGCACCTGGTCATACCCCCCATCCTTATATGTGGGGGCCACAGCCTATGATACCACCTTATGGCACCCCTTATGCAGCACTATATGCCCATGGTGGTGTTTATGCGCATCCTGGAGTCCCAATTGGATCTCATCCTCCTAGTCATGGTATGGCAACATCTCCTGCTGTCAGCCAGGCCATGGATGGTGCTTCTTTGAGTTTAGATGCTTCTGCTAAGTCCTCAGGGAATTCTGAGCGAGGCTTG…	MGNSEDGKSCKLEKPSSPAPDQSNLHVYPDWAAMQAYYGPRVAVPAYFNSAVAPGHTPHPYMWGPQPMIPPYGTPYAALYAHGGVYAHPGVPIGSHPPSHGMATSPAVSQAMDGASLSLDASAKSSGNSERGLMKKLKEFEGLAMSLGNGSADNVEGGTDNGHSQSGETEGSTDGSNTNGVGVSERSKKRSCETTPDNSGDDKSHSRRCQPSGEVSNDAEKAIVAVSPGKVAEKVTGTVLSPSMTTLEMRNPASAHMKAGPTNGSPLSPALPSEAWLQNERELKREKRKQSNRESARRSRLRKQAEAEELAVRVQSLTAENMTLKSEINKLIENSEKLKLDNAALMERLKNEQLGQTEEVSLGRIDDKRLQPVGTVNLLARVNNSGSSDRTNEEGEVYE…
268	Capsicum chinense	CCHI_44	CC.CCv1.2.scaffold424.124		C	Chr08	179085275-179092882	ATGGATAGGGTATTTTCAGTGGACGATGACATTGGCGACCATTTTTGGTCTACGCCGCCGTCGACGGCGGAGTTAGGCGTTGATTCACCTACCTCCGCCGCCGCCAACTCCTACTCTAAGATGATGAATCGGAGCTCCTCCGAATGGGCTTTCCAGCGCTTCTTACAAGAAGCCACCGCCGCTTCTCCTCCTCAGCCACCTACAATGGCGTCTTCATCATCATCGTCGCATCAAAACGACGTCGTCGAGATCAAGGATGAGAGTCTATCTTCTGCTGCTAATCGCAATTCCAGTACGGCGTTGAATTTGAAGCCGGCGACGTCGTTTGTATCTGGACCTCCGCAGAATATTCCTGTTGATTCTGAAGAGTATCAAGCTTTCCTCAAAAATCGCCTTGAT…	MDRVFSVDDDIGDHFWSTPPSTAELGVDSPTSAAANSYSKMMNRSSSEWAFQRFLQEATAASPPQPPTMASSSSSSHQNDVVEIKDESLSSAANRNSSTALNLKPATSFVSGPPQNIPVDSEEYQAFLKNRLDLACAAVALSRAKNLKPQNSSSTVPDKGSETAGASQSVSHIGIKGSGQELTNIQDKDSGGPVGIPSLPPVQKKPGVQVKSTTSGSSRDQSDDDEAEGEAETTQGTDPADVKRVRRMLSNRESARRSRRRKQAHLTELETQVSQLRVENSSLLKRLTDISQKYNESAVDNRVLKADVETLRAKVKMAEETVKRVTGLQPLFQAMSDVTSMAMPSFSGSPSDTSADAAVPVSNDPKHHYYQQPPNNHMPTHDPRIQNGMVDVPPIGNVQ…
269	Capsicum chinense	CCHI_45	CC.CCv1.2.scaffold562.11		A	Chr08	186135381-186137431	ATGGGATCTTACATGAACTTCAAGAACATTGCTGACACACCACAGCCAGAGAGCAACACGGGGAAGTCAATGGGTAATGGTGATCTCCCTTTGGCTAGGCAATCTTCCATATACTCGTTGACGTTTGATGAGCTTCAAACTACATTTAGTGGACTTGGAAAAGATTTTGGATCAATAAATATGGAGGACCTGTTGAAAAGCATTTGGTCAGCTGAAGAGTCTCAAGCTGTGGCATCGTCTAATGGTGGAGGAGATGATGGGAATGGGAATCTACAGAGGCAAGGTTCTTTCACACTACCTCGGCCACTTAGGCAGAAAAGTGTTGATGAAGTATGGAGAAACTTTCAGAAAGAAACTGTTGGTACCAAAGATGAAAGTGTCTCTGAGAAATCAAGCTTT…	MGSYMNFKNIADTPQPESNTGKSMGNGDLPLARQSSIYSLTFDELQTTFSGLGKDFGSINMEDLLKSIWSAEESQAVASSNGGGDDGNGNLQRQGSFTLPRPLRQKSVDEVWRNFQKETVGTKDESVSEKSSFGQRQSTLGEMTLEEFLVKAGVVREDMQSNSNSIGITYNDGLSQQNNNSLNIAFQQPTQDTGLLINQMAANNMLNVVGATASQQQPQQQQRPLFPKQTTVAFASPMQLSNNGNLASPRTRAPAVGMSSPSVNTNNIAQGGVIGMGEFHSGVSPAKGGSPGNDFTSRSNVDTSSLSPSPYAFNEGGRGRRSGSSLEKVVERRRRRMIKNRESAARSRARKQAYTLELEAEVAKLKEINEELRKKQAEIIEKQKNQLLDKRSMPCGYKL…
270	Capsicum chinense	CCHI_46	CC.CCv1.2.scaffold1322.15		S	Chr08	192001704-192002207	ATGGCTTCTTCAAGTGGTACATCATCAGGTTCATCATTTCTTCAGAACTCAGGGTCAGAAGAAGATCTTCAGCTGTTAATGGATCAGAGGAAGAGAAAAAGAATGATATCAAACAGGGAATCAGCAAGAAGATCAAGAATGAGAAAGCAAAAACACTTGGATGATTTGATGGCCCAAGTATCAACACTAAGAAAAGAGAATGACCAGATATTGACAAGTATGAATGTCACAACACAACATTATCTTAATGTTGAGGCTGAAAATTCAATCTTGAGAGCTCAATTAAGTGAACTTAGCCATAGGCTTGAGTCACTTAATGAAATCATTGCATATATGGATGCCAACAACAGTTGTAGTAATGGTCTTGCTATGGACCACAATGAGCCATCTAGCTTCAAT…	MASSSGTSSGSSFLQNSGSEEDLQLLMDQRKRKRMISNRESARRSRMRKQKHLDDLMAQVSTLRKENDQILTSMNVTTQHYLNVEAENSILRAQLSELSHRLESLNEIIAYMDANNSCSNGLAMDHNEPSSFNFAQSDTVVDGFNMTNSWNYFCSNQPIMTAHVLQY*
271	Capsicum chinense	CCHI_47	CC.CCv1.2.scaffold832.14		I	Chr08	192282496-192285105	ATGGCTAGTGACAATGATGAAGGTAGTAGTGATATGGTACAAAGACTGCAATCGTCATTTGGTACATCATCTTCTTCACTACCTAAACAGTTACAGCCTATTTCAGTGAACCAATTGGACATACCACAGTTGACTACTTCCCAATTTAGGGGTCAAATGAGGCAGTTTTCTCCAAATTTTGGGGTTGATAATAGTAAGAGAGTAGGTATACCACCTTCTCACCCGCAAATGCCTCCTATTTCGCCATATTCTCAGATCCCTTTAACCAGGCCAGGGAATCAGCAAATGGGTATGCAGAATTTTAGTCCAGGGGCATCACATTCGCGATCTTTATCACAACCAGCATTTTTCTCACTTGATTCCTTGCCACCCTTGAGCCCTTCACCGTATAGGGAATCC…	MASDNDEGSSDMVQRLQSSFGTSSSSLPKQLQPISVNQLDIPQLTTSQFRGQMRQFSPNFGVDNSKRVGIPPSHPQMPPISPYSQIPLTRPGNQQMGMQNFSPGASHSRSLSQPAFFSLDSLPPLSPSPYRESPSTSMSDPMSADVSMCDQDGNSHSLLPPPPFSRCNSSRAGERESLPPRKAHRRSNSDIPFGFSAIMQSSPPLAPLRSVPSRDNSGGKPAQLVKRETMWDRGNENNNVEGMGERKSEGEVVDDLFSAYMNLDNIDAFNSSGTDEKQGNENREDLDSRASGTKTNGGDSSDNEATSSVNDSGGSMQKLGMSSSVEKREGIKRSAVGDIAPTTRHYRSVSMDSFMGKLNFIDDSPKLPPSPGPRPGQLSPTNSLDGNSNSFSLEFGNGE…
272	Capsicum chinense	CCHI_48	CC.CCv1.2.scaffold705.27		A	Chr09	404503-406624	ATGGGAGTAACAGAATCAGAGATGGTGTCACAAGGTGAAGTTCAATCACCATTGCAACAAGACCAAAACCAGCACAAGAATCAACTGTTTTCGTCGCTTGGTAGACAAGCGTCGATCTACTCCCTCACACTCGACGAGTTCCAACACACCCTTTGTGAGAGTGGGAAGAATTTCGGGTCGATGAACATGGATGAGTTCCTTAATAGCATTTGGACTGCCGAAGAAAACCAAGCGCATGCTCACGCTCACGCCCATGTGCACGCGCATGCGCATGGGCATGAGCATTCTCATGCTCAGCCTCACAGCCAGAGTGTAAGTGCCGGGGAAGCCACTAGCGCGGCGCCACATTTTGCGTTGGGACAAGGCAATAGCTTGCCGAGACAGGGATCACTTTCGCTT…	MGVTESEMVSQGEVQSPLQQDQNQHKNQLFSSLGRQASIYSLTLDEFQHTLCESGKNFGSMNMDEFLNSIWTAEENQAHAHAHAHVHAHAHGHEHSHAQPHSQSVSAGEATSAAPHFALGQGNSLPRQGSLSLPEPLCRKTVDEVWSEIHKNQQQQQQNNGGSVPNTSNSSSTQRQATFGEMTLEDFLVKAGVVREQGNAAAPVPTQQQSYTMYQNSTAPTMGAMARPVIGLSGVTAGVGVGVGIPGYPQLPQSGVVEAPLYPISMKRGSGFPQQPTPVYGGRIGNGSGVGYGQVQGVAGMGSPLSPVSSDGLCVNQLDSGGQYGLEMGMRGGRKRVLDGPVEKVVERRQRRMIKNRESAARSRARKQAYTVELEAELNQLKEENAHLKQALADLERKR…
273	Capsicum chinense	CCHI_49	CC.CCv1.2.scaffold705.55		J	Chr09	903442-907338	ATGGGGATAAAAGAAAAACCAATAAATAGAGGTTTCTCTCATTGTTGTCGTCGTCTCTTTATAGGAGGCAAACATCGTCACAAGCGTTGGATGAATCGTGAAGATCCAACTCGGACACTACAGTTTCGTGAGCAAGCAATCGAGGGACAGTCCGAGCAGGAATCTGAACCCAAAACAAACCCTCGACATGCTCTTAACTGTCCACCAGCTACCAGCAGAAGATCGAGGCAGAATTTGACCGAGGAGGAGAAGGAACAACGAAGACTCAGTCGTGTGTTGGCAAATAGAGAGTCTGCTAGACAGACGATTCGCCGGAGACAGGCCATGTATGAAGAATTGACAAGAAAAGCAGTTGATCTTGCATCGGAGAACGAAAGTTTAAAGAAGAAAAAGGAGATG…	MGIKEKPINRGFSHCCRRLFIGGKHRHKRWMNREDPTRTLQFREQAIEGQSEQESEPKTNPRHALNCPPATSRRSRQNLTEEEKEQRRLSRVLANRESARQTIRRRQAMYEELTRKAVDLASENESLKKKKEMAAKEYDSLKNQNASLRLQIAKAEKAEGEETDGASTSKPVHISTTRTGPAPPPAPYPTPTPSPMPPLFWPSIVQPFNSFVLQCNTPNVSGITSVLSSSTAGESNSITNPGNPFYVLPVPCLIPFNPQNSPVFPWSATLDKHPETSGVHHCDTSYPNMENNPAATAQERETDAPDSVQATQNRQPGTSRQSDRRHRQHNTPDINATVSFTAGQVGDTSEKTTCQESITCSSDKSADAVAAAAEARRRRKELLHLKGHHSDTPNH*
274	Capsicum chinense	CCHI_50	CC.CCv1.2.scaffold308.5		E	Chr09	226007870-226013229	ATGGCACACTTACCACCAAGAGCGCCTAACATGACACCAAATTGGCCTGATTTTTCGCTTCATCAAAAAATTGAAAACTTAGCTCCGTCCCCCCATAATTTATGGGCGGACGAATTCCTCGACTCATCATCGAGGCGCGGGTCCCACCGGAGATCCATGAGCGACTCCATTGCATTCTTGGAGTCGCCCATGGTGGAAGAATGTCGTAGGCTATCCAGTACTACTCCAGGGTCCAGTGGGACAACTAACGGTCACGAGGACTTCGAGAGGTTTGATGACGAGCAACAAATCATGTCCATGTTCAACGACGACATAAACGACATGTCCTGCTCGAATCCATCATCACCTTCAGATTATATCAACGTTAATGAAGATAAAAAGATCAACGGCCCTGATCAG…	MAHLPPRAPNMTPNWPDFSLHQKIENLAPSPHNLWADEFLDSSSRRGSHRRSMSDSIAFLESPMVEECRRLSSTTPGSSGTTNGHEDFERFDDEQQIMSMFNDDINDMSCSNPSSPSDYINVNEDKKINGPDQLMQQLKSDQNEEIQSSCKTNEELAPANQNTSTNNECSSERVVDPKRIKRILANRQSAQRSRVRKLQYVSELERSVTTLQAEVSVLSPRVAFLDHQRLLLNVDNSALRQKIAALAQDKLFKDAHQEALKVEIERLRQIYYQQQMDNTTTPVADSTTAPPEIKVQLRVN*
275	Capsicum chinense	CCHI_51	CC.CCv1.2.scaffold512.11		I	Chr10	152886466-152888480	ATGTTGTCCCTCATGCATGAAGTAAAGGGAAGGATTTTGGCGAATCGGCAGTCTGCTTCTCGCTCGAAAGAGAGGAATGCCCGTTACATAACTGAACTTGAGAGAAAGGTTCAGACCCTTCAAACAGAAGCAACCACTCTTTCTGCTCAATTAACCCTTTTCCAGCGGGATACGACCCAGTTTACTAATGAGAATACAGAGCTTAAGCTACGTCTGCAAGCTACGGCACAACAAGCTCAGGTACGAGAAATTGACTTTCAAAGTGATCCATGGCCATCCATATCAAATAGTGCCAAGGACCTTATTCGGAAAATGCTAACACAAGAGCCAAAGAAGAGAATTACTCCAGTGCAAGTTCTTGGTATTTCTCCTGTTTCCCTTTGTAATCAAAAGTTACAG…	MLSLMHEVKGRILANRQSASRSKERNARYITELERKVQTLQTEATTLSAQLTLFQRDTTQFTNENTELKLRLQATAQQAQVREIDFQSDPWPSISNSAKDLIRKMLTQEPKKRITPVQVLGISPVSLCNQKLQ*
276	Capsicum chinense	CCHI_52	CC.CCv1.2.scaffold366.4		A	Chr10	217481363-217488370	ATGGGATCTCAAGGGAGTGGTGGGGTTAATAGTGTTGGTGCAACACAAGCTCAAGACCCGAAAACGAATGCTTTGGCTAGGCAAGGATCATTATATAGTCTCACTCTTGATGAGGTTCAGAATCAATTAGGGGATTTGGGGAAGCCGTTGAGTAGTATGAATCTTGATGAGCTTCTTAAGACTGTATGGACTGCTGAGGCTAGTCAAGGAATGGAGGGAACGGATTACGGGGCGTTGCAGCATGGTCAGGTTGCTTCGGGGAGTTCTTTGCATCGACAATCGAGCATTACATTGACTAGTGATTTGAGCAAGAAGACTGTTGATCAGGTGTGGCAGGATATTCAACAGGGACATAAAAGGGATAATATCGATAGGAAAGCTCAGGAGAGGAAGCCTACT…	MGSQGSGGVNSVGATQAQDPKTNALARQGSLYSLTLDEVQNQLGDLGKPLSSMNLDELLKTVWTAEASQGMEGTDYGALQHGQVASGSSLHRQSSITLTSDLSKKTVDQVWQDIQQGHKRDNIDRKAQERKPTLGEITLEDFLVKAGVVAESNPGKKSLGSVLGVDSMTLPQQSVQQQAQWSQYQIQAMHQIPPQQQPQQQNMLPVFMPSHPVQQPLTIVPNPTIDAAYPESQMTMSPTALLGTLSDTQTLGRKRVAPEDVVEKTVERRQKRMIKNRESAARSRARKQAYTHELENKVSRLEEENERLKRQKEIEKVLPSVPPPEPKYQLRRTSSAPF*
277	Capsicum chinense	CCHI_53	CC.CCv1.2.scaffold398.13		D	Chr10	220306753-220315900	ATGCCAAGTTTCATTTCTCAGATACCAGTTTCAAATCACATGGGCACCGAAGGGAACAATACAAATACTTCTCGAATGTCTGAATTTGGGGTGCTTGAGCAATATCTTGGATTCCGTATTGGAGATGGTTCTAATGCTAATCGAAGTCCCCTATTTAATTCAACATCTGCAACTAATCCAGCAGTGGGCTTTGACGTCTCTGGAACCATCAATAGGAATTTAGCTCCTTCAAATACAAGTTTGTCTGCTGCTGCTCCGGGATCTCAGATATTACAATTGCAATCAAGTGTAGTTCCTGTATCCTCTCATCCTGAGAATTGGGGCGAGTCCAACTTGGCCGATTCTGGTTCTCGCACTGATACTTCAACTGACATGGATGGAGATGATAGAAATCAACGG…	MPSFISQIPVSNHMGTEGNNTNTSRMSEFGVLEQYLGFRIGDGSNANRSPLFNSTSATNPAVGFDVSGTINRNLAPSNTSLSAAAPGSQILQLQSSVVPVSSHPENWGESNLADSGSRTDTSTDMDGDDRNQRIETGQSRTIAASDSSDKSKEKVLDQKTLRRLAQNREAARKSRLRKKAYVQQLENSRLKLSQLEQDLQRARQQGKYISNMGDQSNGVGASGTLAFDAEYSRWLEEHNKHINELRKAVNSHASDPELRSIVNNVTAHFDEVFRVKGNAAKADVFHVLSGMWKTPAERCFMWIGGFRPSELLKLLVTQLEPLTEQQLAGIYNLQQSSHQAEDALSQGMEQLQQSLAETLANGSPATEGSSGDVANYMGQMAMAMGKLGTLDGFLRQADS…
278	Capsicum chinense	CCHI_54	CCHI_bZIP.Chr10.1		D	Chr10	221059285-221067394	ATGGATTCCACTAACAATAATATTTCTTTCATCAACCACCATCAGTTTTTTCATAATATTCCGCAGCAGCAGCAACAACAACAACAAATGGAAAATAATAATAATCATCATCATCAGATATCTTTTGGATTATTTCAACAGTCACCTTCTTCATCATCTGCTAATCCTGATGAAAACTTCATAAGCAAAGAGAATGGTGGAGCTTATGATTTAGGTGAACTAGATCAAGCACTTTTTCTTTATCTTGATGGACAAGATCATCCTTCTTCATCAATCCAAGATCAAAGACAGAATAATTATGGGATGAGGCCGCCAACTCTCAACATTTTTCCATCACAGCCAATGCATATCGAGCCATCTTCAACTAAGGAAACTATTGGATTAGTTTCTCAATCTACA…	MDSTNNNISFINHHQFFHNIPQQQQQQQQMENNNNHHHQISFGLFQQSPSSSSANPDENFISKENGGAYDLGELDQALFLYLDGQDHPSSSIQDQRQNNYGMRPPTLNIFPSQPMHIEPSSTKETIGLVSQSTTSGSKKTSQPSMDKTEPPPKVPKSEGSGKSPTSSQEQDAPKTPDPKTLRRLAQNREAARKSRLRKKAYVQQLETSRIRLAQLEHEIQRARSQGFHVGGNVLHGGDQGFQINRTNVSSDAAAFNLEYARWLEEHHKLLCELRNAIFEEQLQEDELRIYVENCVAHYDNMMNFKGILAKSDVFHLVSGLWKSPAERCFLWIGDFRPSELLKIIVNQIDALTENQVLGLCALQQSTQEAEDVLSQGLEALNQSVSDTIIASDALIMGNN…
279	Capsicum chinense	CCHI_55	CC.CCv1.2.scaffold902.35		D	Chr10	225742957-225747820	ATGGGGCTTCAAAGTCATGATAATCAAATTTCTTTTGGAAGTCATGATCATCACCAGTACCATCAACAACCTCAGCAACATCAGCACCAGCACCAACACCAACACCTATTATTCCATGATCAGCAGAATAACGCTGATCAGATTACTTTTGGAATGTTACATCAGTCATCTTCTGTCATACCAGAAAACTTCGTAAGCAAAGAGAGTAGCAGTACTGGAGGTTATGATATAGGTGAACTAGATGATCAAGCTCTTTTCCTTTATCTTGATGCTCAAGATCCTTCTTCAAATCATGACCAAATACAAAATAATTCAGAGATGATGAGACCACCAACTCTCAATATTTTTCCATCACAACCTATGCATGTTGAGCCATCATTCACAAAGGGAAATGCTGGA…	MGLQSHDNQISFGSHDHHQYHQQPQQHQHQHQHQHLLFHDQQNNADQITFGMLHQSSSVIPENFVSKESSSTGGYDIGELDDQALFLYLDAQDPSSNHDQIQNNSEMMRPPTLNIFPSQPMHVEPSFTKGNAGFISSGSEKSSEPSMMELSKTKNNALSTSSGPEPKVPKREWNRKGQNSGTEQNASKATDHKTLRRLAQNREAARKSRIRKKAYIQQLESSRIRLAQLEQELQRARSQGFHFAGSALLGGEQGLSGNIGNISSDAAVFDMEYSRWLEEHHRLMCELRNALTEHFPENELRMYVDNCVSHYDEIMNLKAMLLKSDVFHLVSGTWKTPAERCFIWMGDFRPSEIIKIILSQIEPLTEQQFVGICGLQQSTQEAEEALSQGLESLNQSVSD…
280	Capsicum chinense	CCHI_56	CC.CCv1.2.scaffold685.36		A	Chr10	232589872-232592103	ATGGTGGTGACTTGTGGGATGGGATCTCAGGAGGGAGGTGGCGGTGTAATAGAAGCAAATCCAAATGCTTTGGATAGGCAAGGATCACTCTACAGCCTCACTCTTGACGAAGTTCGGAATCAATTGGGGAGTAGTGGAAAACCACTCAATAGCATGAATCTTGATGAGTTTGTTAAAACTGTACGGACTATTGAGGCTAATCAAGAAGTGGGCGGAAATGGTTACGGGGCAATGCAGCACGGGGCTTCTGTGCATCATCAATCGAGCATAACAATGACCAGGGATCTAAGCAAGAAGACTGTCGATGAGGTGTGGCAAGATATTCAGCAGGGGGGGAAAAGAGAGAGCGTTGAGAAGAGAAGCCCGGAGATGCAACTTACTTTAGGTGAGATAACTCTG…	MVVTCGMGSQEGGGGVIEANPNALDRQGSLYSLTLDEVRNQLGSSGKPLNSMNLDEFVKTVRTIEANQEVGGNGYGAMQHGASVHHQSSITMTRDLSKKTVDEVWQDIQQGGKRESVEKRSPEMQLTLGEITLEDFLVKAGVIAESNQGKRNSGLVSGVNSMALGQQAQWPHYQIPAMQQVPEHHHQQQQQQNRQPVFMPGHPIQQPLPVVANPIMDATNPETKVTMSPAHAVGTLSDTHTMGRKRAAPGDVIENSAERRQKRMIKNRESAARSRARKQAYTHELENKVSRLEEENERLKRQKEIENILPSVPPPEPKYQLRRTSSGPI*
281	Capsicum chinense	CCHI_57	CC.CCv1.2.scaffold1512.6		B	Chr10	233389660-233392362	ATGGGCGATTCAGTTGTGGCCGATCCACCACCGTTGACGTCGGGGGAAGTGGCGGCGAATCCTGCCGGAGAATTTGACGGTCTTCCAGTTCCACCTTTTGATGGTAATTTTTTCGCTCAACAAATGACGTCAGCAGATCACGATGATTTTCCGATTGAATTCCAGCTTGATGATATCGATTTCGATCTGTCGTTCGATGATTTTTTTCAGAATCCTTGTGATGGTAATTTGCCTGATGTTCTCGGGTCGGATCCCGGTCTGATTGACCCGAATAGCTTCGGTAAAATCGGGGATTTTGATTCCTCCTTCGATGACTGTCTTAAGGAACCTCCGGGTTCGAATTTGGGGCACATGGACCCTTATTGCTTTGGCCAAATTGGGGATTTTGACAATATTGAT…	MGDSVVADPPPLTSGEVAANPAGEFDGLPVPPFDGNFFAQQMTSADHDDFPIEFQLDDIDFDLSFDDFFQNPCDGNLPDVLGSDPGLIDPNSFGKIGDFDSSFDDCLKEPPGSNLGHMDPYCFGQIGDFDNIDESSGNVKLTSTDTSSPELYQSSSSSGVLNEQGSTDVFGYLNVSSPVSNGSNNKDLSDVKVKALNCHSPESQGSGHCGSNLSEGLNYQSDSNKSVHSSPNLGNNSMKGVVVEQKFKVERGNAGISKCSSILKRKKCSEDSNNINKIQKSNTFSLSDNVNSEEDEKRLARLIRNRESAHLSRQRKKHYVEELEDKIRMMHSTIQDLNAKVSYVMAENVTLRTQLGGAGVPPPVPPPPGMYPHPPVMYPWMGYTPPYMMKPQGSQVPLV…
282	Capsicum chinense	CCHI_58	CC.CCv1.2.scaffold1012.12		D	Chr11	6306237-6308597	ATGGATCAGTCCAAAATAAAGCTTGGAGACCAGAAGACACTTCGCAGGCTGGCTCAGAATCGAGAAGCTGCTAGGAAAAGCCGATTGAGGAAAAAAGCATATGTTCAACAGCTGGAGAATAGTAGGCTCAGATTGTCGCAGTTAGAGCAAGAGCTAAAACGAGCTCGACAACAGGGCATATTTATTGCTAATGGATACACTGGAGATCAGAGCCTTTCTGCTGGTGGAAATGGGGCTTTGGCATTCGACATGGATTATGCACGTTGGCTAGAAGAACATCAACGGCTTATCAGTGATCTCCGATCAGCTGTAAATTCTCACAGGGGAGATAACGAACTGCGCCATCTTGTTGATGGAGTTATGTCACATTACGACGAGAAATTCAAGTTAAAGAGTGTA…	MDQSKIKLGDQKTLRRLAQNREAARKSRLRKKAYVQQLENSRLRLSQLEQELKRARQQGIFIANGYTGDQSLSAGGNGALAFDMDYARWLEEHQRLISDLRSAVNSHRGDNELRHLVDGVMSHYDEKFKLKSVAAKSDVFHMLSGMWKTPAERCFMWLGGFRSSELLKILGNHLEPLTEQQLMGICNLQQSSQQAEDALSQGMEALQQSLVDTLSSTSLGPTGTGNVADYMGQMAIAMGKLATLENFLYQADLLRQQTLQQLHRILTTRQAARALLVISDYMSRLRALSSLWLARPKDQL*
283	Capsicum chinense	CCHI_59	CC.CCv1.2.scaffold824.4		S	Chr11	10025771-10026427	ATGCTCTCCTACAATCTCACCATTATCTGCAAATTGAAGTTTCTTCATATAAATTTAACTATGATTCCATCAGAGGCTACTGCAACTCACTACTTTGCGTCCGAAAATCCTTCACCTTTGCCTCTTGACTTCAACTTCATGCACAACAGTTTACCATCAATCCAGTTTAGCAGATACTTAACAAATGTACCAAATTATCCAACTTCACTTCATGTTCATGACTTTAACAATCTGCCACTATCTTGCATCAGTAGTAACTCTACCTCTGATGAAGCGGACGAGCAGCAACTTAGGATCAACGATGAGAGAAAGCAAAGGAGGATGATATCTAACCGAGAATCAGCAAGAAGATCCAGGATGAGGAAACAAAGACATCTTGATGAGTTATGGTCACAAGTT…	MLSYNLTIICKLKFLHINLTMIPSEATATHYFASENPSPLPLDFNFMHNSLPSIQFSRYLTNVPNYPTSLHVHDFNNLPLSCISSNSTSDEADEQQLRINDERKQRRMISNRESARRSRMRKQRHLDELWSQVLRLRTENNNLIDKLNHVSECHEKVLQENVQLKEEASDLRQMLTDLQFNSPFPDLCDLDDDVPCTTAHLKAESSNLSITYSTNLLH*
284	Capsicum chinense	CCHI_60	CC.CCv1.2.scaffold131.8		A	Chr11	121050380-121069857	ATGAATCAAATTCCCCATCTGTCACAACTAATGAATCAGCTATTAGAAGAAATCAAAATATCTCCTCCAACAGATGGTCCATTTGTCATAACAGATAATCCATATGTTGCAACAGATGTCTTATCTATTACAACATACAGACCATCTATTATGATAGATGATATGTCTGATCCTGTTTGGGACATTGCTATTCTGCGCGACATCGTGCGAGAACTTCAAAGGAAGATTTTCCTTGTCATAACCATGGGATCTTACCTGAACTTCAAGAACTTCGCTGACACATCACAACCAGAGAGCAGTGGGACTAATAATTTTTCATTGGCCAGACAATCTACCATATACTCCTTTACCTTTGATGAGCTGCAAAGTACATGTGGACTTGGAAAAGATTTTGGATCG…	MNQIPHLSQLMNQLLEEIKISPPTDGPFVITDNPYVATDVLSITTYRPSIMIDDMSDPVWDIAILRDIVRELQRKIFLVITMGSYLNFKNFADTSQPESSGTNNFSLARQSTIYSFTFDELQSTCGLGKDFGSMNMDDFLKNVEGENLQRQGSLTLPRTLSQKTIDEVWKDFQKESVNANDVSETGGSNFGQRESTLGEMTLEEFLVRAGAVREDMQPTGYSNDVTLTTTSGFIQTSSNVTIKFLQATQNPGHQIAGTNIFNVVSTTSLPQQPLFPKQTTVEFASPMQLGTRAPMPNPSANTNSIMQGGVMSIPVKGVTPGNLDTSSLSLSPYACGEGGRGRRSCTSIEKVVERRRKRMIKNRESAARSRDRKQAYTLELEAEVAKLKEIKQQLQKNQA…
285	Capsicum chinense	CCHI_61	CC.CCv1.2.scaffold9.14		D	Chr11	163980059-163993001	ATGGCTGATATCAGTCCTAGTACGTCGACAGATGCCGATACTGAAGATAAGAACAGGTTCCTAAATCAACAACTGGCCATGGCTTCTGATGGAAGTGACAGACCGAAAGATCAAAAGACACTCCGTAGACTTGCTCAAAATCGCGAAGCCGCTCGAAAAAGCCGTCTAAGGAAAAAGGCATATGTTCAACAGTTAGAGAGCAGCAGGATGAAGTTGACACAACTAGAACAGGAGCTTCAACGGGCCCGGCAACAGGGAATATTTATTTCAGGTTCAGGAGATCAATCACAGTCGATGAGTGGAAATGGAGCTTTGGCATTTGATGTAGAATATGCCCGATGGTTGGAAGAGCAGAATCGACGAATTAATGAATTACGGGGAGCTGTTAATTCTCATGCT…	MADISPSTSTDADTEDKNRFLNQQLAMASDGSDRPKDQKTLRRLAQNREAARKSRLRKKAYVQQLESSRMKLTQLEQELQRARQQGIFISGSGDQSQSMSGNGALAFDVEYARWLEEQNRRINELRGAVNSHAGDAELRIIVDGISAHYDDIFRIKGDAAKADVFHILSGMWKTPAERCFLWLGGFRSSELLKLLINQLEPLTEQQLLAINNLQQSSQQAEDALSQGMEALQQSLAETLAGSLGPSGSSGNVANYMGQMAMAMGKLGTLEGFIRQADNLRQQTLQQMHRILTTRQSARALLAISDYFSRLRALSSLWLARPRE*
286	Capsicum chinense	CCHI_62	CC.CCv1.2.scaffold1304.1		S	Chr11	211194378-211202156	ATGATTATGCCCGGTGAAGCCGGAGAAAATATTGATACTATGATGATTCCCAGTGAATTCGGAGGAAATATTGATACTATAATGATGCCCAGTGAATTTGGAGGACATATTAATACTATGATGATGCTCGGTGAATTCGGAGGAAATATTGATACTATGATGATGCCCAATGAATTCGAAGGAAATATTGATACTATGATTATGCCCGATGAATCCAGAGAAAACATTGATACTATGATGATGCCCGATAAATTCAAAGGAAATATTGATACTATGATGATGTCCAGTGAATTCGGAGGAAATGTTAATGTTATGATGATGCCCGGTGAATCTGGAAGAGGTAATAATGTTATGATGATACCCGGAGAATCCGGAAGAGGTAATGATGTTATGATGATA…	MIMPGEAGENIDTMMIPSEFGGNIDTIMMPSEFGGHINTMMMLGEFGGNIDTMMMPNEFEGNIDTMIMPDESRENIDTMMMPDKFKGNIDTMMMSSEFGGNVNVMMMPGESGRGNNVMMIPGESGRGNDVMMIRSESERDPRYAKFDERKRKRMESNRQSAKRSRMRKQQRLEELKNETTQLQDQNSNCRDKIDSV*
287	Capsicum chinense	CCHI_63	CC.CCv1.2.scaffold200.34		D	Chr11	241172299-241186938	ATGGAGAATCAAAGAGGCACAGCAAGTACTTTGTCAGCTGATCATCATAACATGCCTTATAACACAAGCCTCATGTATCATTCCACAATAAATAGTAATCAAGAACCATCATCAACTTTTGATTTTGGAGAGTTGGAAGAAGCAATTGTTCTACAAGGAGTTAAGATGAGCAATGATGAGTCTATTAAATCATCTTTATATGAAGCAGCCACAAACAGACCTGCAGCAACTTTGGAGATGTTCCCTTCTTGGCCTACTAGAGTCCATCACACCCCAAGAGGAAGCTCAAAATCAAGAGGAGAACAAAGTAGTGATTCAGGTTCAGCACTAAACACAACAATTTCAAGTAAAGGTGAAGCAAATTTGGAGCCAGAATCTCCTATTAGTCAACAACAACAA…	MENQRGTASTLSADHHNMPYNTSLMYHSTINSNQEPSSTFDFGELEEAIVLQGVKMSNDESIKSSLYEAATNRPAATLEMFPSWPTRVHHTPRGSSKSRGEQSSDSGSALNTTISSKGEANLEPESPISQQQQFQEMASDSPTTGVSHTEKRKGAGSTSDRVTDAKTLRRLAQNREAARKSRLRKKAYVQQLETSRMRLAQLEQELQRARSQGLFMGGGAAGPNISSGGAMFDMEYSRWLDDDQRQISELRTALQSHLGDVELRIIVDDYIAHYDDIFRLKGIAAKSDVFHLITGVWVTPAERCFLWIGGFRPSDLIKMLIAKLDPLTQQQVVGIYSLQQSSQQAEEALSQGLEQLQQSLIETIATGPANDGMHHMAIALAKLANLEVFLHQADNLRQQ…
288	Capsicum chinense	CCHI_64	CC.CCv1.2.scaffold809.4		St	Chr11	248586134-248591691	ATGGCTATGGTGGCACAGCAGCATAGGGAGAGTAGTAGTGGTAGTATTACAAAACATCTTGATAGTAGTGGAAAGTATGTTAGATACACGGCTGAGCAAGTTGAAGCTTTGGAGAGGGTTTATGCTGAGTGTCCTAAGCCTAGTTCGTTGCGCCGGCAGCAATTGATCCGTGAATGTCCTATTCTGTCGAATATCGAGCCTAAGCAGATCAAAGTTTGGTTTCAGAACAGAAGGTGTCGAGAGAAGCAAAGGAAAGAGTCTTCTCGACTACAGACCGTAAATAGAAAATTGTCTGCCATGAATAAACTGTTGATGGAGGAGAATGACCGCTTGCAGAAACAAGTGTCGCAGCTTGTATGTGAAAATGGCTATATGCGGCAACAATTGCAAAATGCATCG…	MAMVAQQHRESSSGSITKHLDSSGKYVRYTAEQVEALERVYAECPKPSSLRRQQLIRECPILSNIEPKQIKVWFQNRRCREKQRKESSRLQTVNRKLSAMNKLLMEENDRLQKQVSQLVCENGYMRQQLQNASAATTDVSCESVVTTPQHSLRDASNPAGLLSIAEETLAEFLSKATGTAVDWVPMPGMKPGPDSVGIFAISHSCSGVAARACGLVSLEPTKIAEILKDRPSWFRDCRNVEVFTMFSAGNGGTIELLYTQIYAPTTLAPARDFWTLRYTTTLDTGSLVVCERSLSGTGAGPNAAAASQFVRAQMLPSGYLIRPCDGGGSIIHIVDHLNLEAWSAPEILRPLYESSKVVAQKMTIAALRYARQLAQETSGEVVYGLGRQPAVLRTFSQRL…
289	Capsicum chinense	CCHI_65	CC.CCv1.2.scaffold336.5		E	Chr12	33373140-33377779	ATGTCAAGGCAAGCTCATCTTCCACCTCGCTGTCCGTTTCAGAAGAAACCGTTAACTTGCCCGGTTCAAGGTCCTTTTAGCCCACCATCACACCAACAGAACCCGTTGCCTCCTCGACATCAAAAATCTGTTTCCGAAAGCTCCATTCTAGAAGAGCAGCCTGTATGGCTTGATGAGCTTCTGAGCGATTCGAGCTCAAATTCTAGTGGCATAATGCATAGGAGATCAGCTAGTGATTCTTTGACACTTTTGGATGGTCTTGGTTCATTGGAAGGCTTTGATAAGTTTGACGAAACTGAATCCAATGCTTCTTGTGAATCGGATAGTAGTTCAAAGACTAATTGTATCTATGGTCCTAATTCACCCCGTGGAAAGAGCAACATAACCTTTGCAGACAAT…	MSRQAHLPPRCPFQKKPLTCPVQGPFSPPSHQQNPLPPRHQKSVSESSILEEQPVWLDELLSDSSSNSSGIMHRRSASDSLTLLDGLGSLEGFDKFDETESNASCESDSSSKTNCIYGPNSPRGKSNITFADNAIVSALSEYVSPNPLQYLDRCISVSGAAQSESVGNASGAADDVSAEAKPMKRHPGQRSRVRKLQYIAELERTVNTYEAIESDLTAKVASLLQRRVTLSMENRELKQQMLRLQQEKVIVDAQYRSLRKELERLKQLARSRNGKLSTNFRVNSAAEMTGSDAAWQMLDFGKLDLN*
290	Capsicum chinense	CCHI_66	CC.CCv1.2.scaffold70.33		D	Chr12	66385041-66389215	ATGAATTCTTCAACCTATACTCAATTTGTTGCCTCAAAAAGGATGGATATATGTGACCCGATCCAGCAGATTGGCATGTGGGGAGATTTCAAAGGTAGCAGTTTCCCAGACACCTTGATTCTTGAAGTTGAGAATTGCCTAGAGAGCGAGATGCCTATTATGGAGAAAAGATTAGATAATGAGACAGAGGAACCTTCACATGTAACAGTTGGAAGGTCTAATATATATGAACCAGAAACAAGTAAACGCATTGACAAGATGAATAGACGCCTCGCACAAAACCGTGAGGCTGCTCGTAAAAGTCGTTTACGGAAGAAGGCCTATGTCCAGCAGTTGGAAAATAGTAAACTGAAGCTGCTTCAGTTGGAACAAGAACTAGAACGTGCTAGACAACAGGGT…	MNSSTYTQFVASKRMDICDPIQQIGMWGDFKGSSFPDTLILEVENCLESEMPIMEKRLDNETEEPSHVTVGRSNIYEPETSKRIDKMNRRLAQNREAARKSRLRKKAYVQQLENSKLKLLQLEQELERARQQGLYVGGGLDTSQIGCSGTANSEIATFEMEYGHWVEEQDRQTDDLKSALNSQIGEIEMRILVEGCLNHYFDLFRLKATAANTDVLYLMSGTWKASAERFFLWIGGFRPSELLKVLTPHVEPLTEQQVQEVCNLTQSCQQAEDALSQGLVKLHQILAEAVAAGTLGDGIILPQMTATIEKLEALVRFVNQADHLRQETLLQMSCILSVQQSAQGLLALGDYFKRLRSLSSLWSSRTSEPA*
291	Capsicum chinense	CCHI_67	CC.CCv1.2.scaffold1006.1		St	Chr12	149253196-149262365	ATGTCCTGCAAGGATGGTAGATCAGTTGAAGATAACGGCAAGTATGTCCGTTATACACCTGAGCAGGTTGAAGCTCTTGAAAGGCTATATCATGAATGTCCAAAACCCAGTTCAATGCGTCGTCAGCAGCTTATTCGTGAATGTCCTATTCTCTCCCACATTGAGCCTAGGCAAATCAAAGTTTGGTTTCAAAATAGAAGATGCCGGGAAAAACAGAGGAAAGAGTCATCAAGGCTTCAGGGTGTGAATAGAAAGCTGTCAGCAATGAACAAGCTATTAGTGGAAGAGAATGATAGATTGCAGAAGCAAGTTTCTCAACTGGTATATGAAAATGGATACTTCCGCAAGCAAACTCAAACTACAAAGCTTGCTTCAAAAGACTCCAGTTGTGAATCAGTG…	MSCKDGRSVEDNGKYVRYTPEQVEALERLYHECPKPSSMRRQQLIRECPILSHIEPRQIKVWFQNRRCREKQRKESSRLQGVNRKLSAMNKLLVEENDRLQKQVSQLVYENGYFRKQTQTTKLASKDSSCESVVTSAQHHLTPQHPPRDASPAGLLSIAEETLTEFLSKATGTAVEWVQMPGMKPGPDSIGIIAISHGCTGMAARACGLVGLDPTRVAEILKDRPSWYRDCRAVEVLNMLPTANGGTIELLYMQLYAPTTLAPPRDFWLLRYTTVMDDDSFVVCERSLRNTQNGPSMPPVQNFVRAEILPSGYLIRPCEGSGSIVRIVDHMNLEAWSVPEVLRPLYESSAVLAQKTTMAALRQLRQLTLEFLQPNVTNWGRRPAALRALSKRLSRGFNE…
292	Capsicum chinense	CCHI_68	CC.CCv1.2.scaffold58.34		D	Chr12	160285304-160288110	ATGAACATGAGTTCTCCATCAACTCAATTTGCCCCCACAAGAAGGATGGGCATATTTGAACCTTTCCACCATATGAGTGTGTGGGAAGACACATTTAGAGGTGACATTATGCCCAGCACTGCTGCGTGTATGGTCACACCGACAAATGACAGGGCAGATGATAAGTCTGGATATACTTCTAGTGAACAACTAATACCATCTGGATCTGAGGATAATCAGGCAGGAAAGAGTATTTCAGACAAGATACAACGGCGTCTTGCACAGAATCGTGAAGCTGCCCGAAAAAGCCGTATGAGGAAAAAGGCTTATGTTCAGCAGCTTGAAAAAAGCAATTTAAAGTTAGCACAACTTGAAATGGAACTTGAGAGAGCTCGACAGCAGGGACTGTACATTTTAGGT…	MNMSSPSTQFAPTRRMGIFEPFHHMSVWEDTFRGDIMPSTAACMVTPTNDRADDKSGYTSSEQLIPSGSEDNQAGKSISDKIQRRLAQNREAARKSRMRKKAYVQQLEKSNLKLAQLEMELERARQQGLYILGSNGNMGLSSTINPGIAAFEMEYSLWVEEQQKKNVELRNILQSHVTEMELQLLVETVLNHYYNLFRMKADAAKADVFYLMSGMWRSSVERFFLWIGGFKPSELINIVMPQLEPLSDQQIVKICNLRHCCQQAEYALTQGMDKLQQTLAQGILTMTTGMGSYSSQMVSSIEKLEALESFVNQADHLRQQTLQQMSLILTTRQSARGLLAFGEYLQRLRALSSLWAARPREPT*
293	Capsicum chinense	CCHI_69	CC.CCv1.2.scaffold687.72		S	CCv1.2.scaffold687	1017209-1017694	ATGGCTACTTCGAGTGGAAATTCATCTCAAATTCAGACTAATTCAGGTTCCGAAGAGGTGTTAATGGTGGTTGATGAGAGGAAGAGAAAGAGAATGCAATCGAATCGCGAATCAGCAAGGAGATCAAGAATGAGAAAACAAAAGCATCTTGATGATTTAAATGGTCAAGTAACACAACTGAAGAATGAAAACAGTAACATCCTCAACAGCATCAATGTTACAACACAACAGTATTCTAATGTTGAGGCTGAGAATTCTGTCTTAAGAGCACAAATGATGGAGTTAACTCAAAGGTTGCAATCTCTTAATGAAATCCTTAATTACATCGACAACAATAATAATAACAACAACAACATTAATAATAATAATAATGGGGGTTTTGAGATTAATAATTATCAT…	MATSSGNSSQIQTNSGSEEVLMVVDERKRKRMQSNRESARRSRMRKQKHLDDLNGQVTQLKNENSNILNSINVTTQQYSNVEAENSVLRAQMMELTQRLQSLNEILNYIDNNNNNNNNINNNNNGGFEINNYHQDDFQINPWNMMYVNQPIMASADMLYQY*
294	Capsicum chinense	CCHI_70	CC.CCv1.2.scaffold704.25		S	CCv1.2.scaffold704	426249-426665	ATGTCAGCTTTAAGGCAGAGTGTTAGTTCATCTGCATCAGAAGATGATCAAAGGTATGCAGGAATGGATGAAAAGAAGAGGAAAAGGATGATATCCAACAGGGAATCGGCGAGGCGTTCGAGGATGAAGAAGCAGAAGCTTCTGCAAGATTTGACAGGTGAAGTGAGCAGATTACAGGGTGCAAACAAGAATATTGTGACTAAGATTGAAGAGACAACGGAGAGATATACAATTTGTGCTGCACAGAATAATGTGTTGAAGGCACAAGTAATGGAATTGACTGATAGGCTCAGGTATTTAAATGATGTTATTGAGAGTACTGGTTTGGCTGCTGATGTTGCTGATCCTTTGTTGAAGCCATTGCAGACTCCTTGTCCAATGCAGCCCATTGCTTCTTCA…	MSALRQSVSSSASEDDQRYAGMDEKKRKRMISNRESARRSRMKKQKLLQDLTGEVSRLQGANKNIVTKIEETTERYTICAAQNNVLKAQVMELTDRLRYLNDVIESTGLAADVADPLLKPLQTPCPMQPIASSGLFKF*
295	Capsicum chinense	CCHI_71	CC.CCv1.2.scaffold794.37		A	CCv1.2.scaffold794	524420-528496	ATGGCGTCAAAGGTGATGTTGTCAGCATCAACAACAACGCCTAATTCGGATCCTTCTTCTTCTTCTCTTCATCCCCACCCTATTACTTCTTCTTCTTCTTCTTCTTTACATCATCAACTTCACTCTCATCCTTCTACGAACTTCGGTTCTATGAACATGGATGAAATTCTTCATAACATGTATTCTGATTCTAACCCTTTTGCTTCTGACCCCACCGCCACCGATGCTGCCGCTGTTAATCCTGTTTCCGGTGGTGGGGATGTGGGGCCCAGTAAGACTGTGGATGAGGTGTGGAGGGAGATTGTAGCAGCGGGTGGGGGTGGGAGTAGGGAGCCGGAGATGACTCTGGAGGATTTCCTGACGAAAGCTGGTGCGGTTACAGAGGAGGATGTTAGAGTT…	MASKVMLSASTTTPNSDPSSSSLHPHPITSSSSSSLHHQLHSHPSTNFGSMNMDEILHNMYSDSNPFASDPTATDAAAVNPVSGGGDVGPSKTVDEVWREIVAAGGGGSREPEMTLEDFLTKAGAVTEEDVRVPVIAPPPPPPPPPPPPSSSTEVLAPAVGGGFVVDNMMGTGNCQFAVAMQQNGPGGYGMEPPPPPHMGYANGVVAAISGSGRGKRRSTVEELPADKATQQKQRRMIKNRESAARSRERKQAYTVELESLVTQLEEENARLLREEEEKNKERLKQIMENLIPVVEKRRPPRILRRVRSMSW*
296	Capsicum chinense	CCHI_72	CC.CCv1.2.scaffold1194.28		F	CCv1.2.scaffold1194	377269-380380	ATGGCTGACGGGGAGCTGGAAATTTCTAACCAAGAAATGTTATCAAGTTCGAATTTTGGTGAATTTAGTAGCTCCATGGACAGCTTTTTCAATGAGATACTCAAGGATGCGCATGCTTGTACTCATGCTCACACTTGTAACCCGCCCGGTCCTGATAACTCCCATACCCATACTTGCTACCATGTTCACACCAAAATAGTGCCTACCTCGGAAGACGATAAGAACCCCAGCGATGATACTGCAGAGTCTGCGGAAAATAAAGGGAAGAAACGCCCGGCGGGTAATAAGGAAGCTGTTCGTAAGTATCGTGAGAAAAAGAAGGCTCGGGCTGCTTCATTAGAGGATGAAGTTGTGAGATTGAGAGCTATAAATCAACAGCTGTTGAAGAGGCTGCAGGGT…	MADGELEISNQEMLSSSNFGEFSSSMDSFFNEILKDAHACTHAHTCNPPGPDNSHTHTCYHVHTKIVPTSEDDKNPSDDTAESAENKGKKRPAGNKEAVRKYREKKKARAASLEDEVVRLRAINQQLLKRLQGQAVLEAEVARLKCLLVDIRGRIEGEIGSFPYQKPMKNGNAYQQIVNPSFPGAYVVNSCNLQCDDQLYCLHPGAEGKSSDGTVVNGQGFNNCEFETLQCFGNQTSELEEVPGCTVGSSTPTANTGRSKRRGGTRATTAS*
297	Capsicum chinense	CCHI_73	CCHI_bZIP.CCv1.2.scaffold11838.1		F	CCv1.2.scaffold11838	290-1150	ATGGTGCACCAGTCAGTTGAATCTAAAATGGAAATGACTTTTTATGAAGAACAACCTTTTCCTCAGCCTCAGAGAATGCCTCATGGGGATATGAATGTTTTGAAACGTACGTTAACTTTGGATCTTAACAAAGCCAACAATGGAGGTAAAAGACAGAAGTTACTTACAAACCAATCAGTTCTTTCATCTCCTGACATAAAGAAGCTCAAATTCAGTGATGGCGAGTTGGAAAAGTTTATCATATCTCAAGCATCCCTCACTGGCTCAAATACATTAATTACTCCCACACCAACTACGACCGCTATCTTGTGCACTCGAGGTACGGAGGAGCAAGAAATGTACGTTCAAGGTTTCCAAGAAGCTCTCAACGCCTTACGTAATAGTGACTCCAATCAAAGT…	MVHQSVESKMEMTFYEEQPFPQPQRMPHGDMNVLKRTLTLDLNKANNGGKRQKLLTNQSVLSSPDIKKLKFSDGELEKFIISQASLTGSNTLITPTPTTTAILCTRGTEEQEMYVQGFQEALNALRNSDSNQSADTQMVELPRSSSNSSSSSSSNLYMALDSSYNPLTSSASNFPPNFSNVVIKDEPQMVPSLGSTPPHSPIDMESQEKIKLERKRQRNRLAASKCRRRKLERIAKLEDKVKLLKGENSELSTMVNRLKDRITHLKKELIVHMQHGCWKDEYISIK*
298	Nicotiana benthamiana	NBEN_1	Niben101Scf00032g02001.1		S	Niben101Scf00032	279352-279645	ATGGTGTGTTCTGGTCGTTTGGCGGACAGCAGCACTGGTGGAGATTGCTGCGTCACTGGTCCGTTGCTGGAGGTTGACGACGGGCTGGTGATGTTGCTGCTCGACGGAGGAAGACGCAGCAGCGTTTCAGGTGAGGGTCGTTTGGACAGGGCTCGGAGGTCACGAATGAGGAAGCAACAGCGATTGAGGGAGTTTATGAGCGAAACAACACAGCTACATAAACAGAACAGTATCTTCCGTGAGAGGATTGATTCTGTCGAGAGAAATCGTAAGAGCACAATTATACGTGATTAA	MVCSGRLADSSTGGDCCVTGPLLEVDDGLVMLLLDGGRRSSVSGEGRLDRARRSRMRKQQRLREFMSETTQLHKQNSIFRERIDSVERNRKSTIIRD*
299	Nicotiana benthamiana	NBEN_2	Niben101Scf00043g03010.1		S	Niben101Scf00043	309082-309675	ATGATTCCATCAGAGGCTGCAGCAATTCACTACTTTGCTTCTGAAAATACTTCACCTCTTCCTCTTGATTTCAACTTCATGCACAACAATTTACCATCACTCCAGTTCAGTAGATACTTAACCAATTTACCAAATTATCCAACCACTTTTCCTGTTCATGATTTCAATAATCTTCCACCGTCTTGCATCAGTGGTAACTCTACGTCTGATGAAGCGGACGAGCAGCAACTTAGGATCATCGACGAGAGAAAGAAAAGGAGGATGATATCTAATAGGGAATCGGCTAGAAGATCAAGGATGAGGAAACAAAAACACCTTGATGAACTATGGTCACAAGTTCTTCGTCTTAGGACGGAGAATCATAATTTGATCGATAAGTTGAATCAAGTCTCGGATTGT…	MIPSEAAAIHYFASENTSPLPLDFNFMHNNLPSLQFSRYLTNLPNYPTTFPVHDFNNLPPSCISGNSTSDEADEQQLRIIDERKKRRMISNRESARRSRMRKQKHLDELWSQVLRLRTENHNLIDKLNQVSDCHERVLQENAELKQEASDLRQMLTHLQINSPFPDLIDLEDIPCTTAHLKAESSNLSITPCTNLLH*
300	Nicotiana benthamiana	NBEN_3	Niben101Scf00077g08013.1		B	Niben101Scf00077	854681-858431	ATGGCTGGGCCGATTTTGGCCGATCCACCGCCGTCTGAAGCGGCAAATCCCACCGGTGAATTTGACGGTCTTCCAATTCCACCGCTTGACCCTACCTATTTTGCCCAACACATCACTGCAGCAGATCAAGGAAAAATCGACGGTTTTCCAATGGAATTACCGGAGGGTGATGAATTCATGCTTGATGACCTAGATTTCGATTTATCCTTCGATGATATCTTCCTTAATAACAGTGATGCCGTTATCAACCCTGATTTCCTAGCCGATTGTCTCGGGTCGGATCCGAATCGAGTTGACCCGAGTTGTTATGGTCTACCTGGGAATCAACTGATGGGGAATTTTGACAATTCTTCTGGAGAGGAACCTCCGGGTGCGAAATTTGTTCCAGCTGACCTGAAT…	MAGPILADPPPSEAANPTGEFDGLPIPPLDPTYFAQHITAADQGKIDGFPMELPEGDEFMLDDLDFDLSFDDIFLNNSDAVINPDFLADCLGSDPNRVDPSCYGLPGNQLMGNFDNSSGEEPPGAKFVPADLNCFGQPGSQLVRDFDDSSRYFKSTSAEFGNFSGNQAAGGVMVIDTSSPELRQSSSGSDVLNATSSTSSHQVSGDVAGYLNVPSPESNGSNHEGSRESANDNKGLGDARVLNCHSPESQDSGNFCSNVSEGLNYPSDSNKSVHSSPNFGNNSIKNGAVEEIIKLDGVNANTSNCSSLLKRKKSREDSNSISIHQKLTTVALSENLNNDEDEKKRARLIRNRESAQLSRQRKKHYVEELEDKVRIMHSTIQDLNAKISYIIVENATLKT…
301	Nicotiana benthamiana	NBEN_4	Niben101Scf00085g03006.1		A	Niben101Scf00085	290547-299238	ATGGAAGTCTCTGAGAATGACAGTGTTGACTATTGTTATAAAGTCAATTTAGAAACATCACCAAAAATGCAAGCAGAACCTTCAGAATACCATGCAATTTCTTCATCAAGTAGGCAAAATAATTCTGCATTTTCACTAACCTTGAATGAATTTCAAAGCAAGAAGGGAAGAAATTATGGGTCTATGAATTTAGATGACCTACTCAATAATTTTTGGGACAATGAAGGAAATCAAGTTACTCCTAATTCAAATCAAGATGTTCCTACAAAAGAAGGACAACATTCAAGGTATAACAACTCAAAGTGTGCTGAAAATGGCAAAGGATGTGCTGATTCTTCTTCAAAACATCGTCAAATCTTTGAACAAGTTAATGGTGGTTTCATTAAGGGCCACCAGAAT…	MEVSENDSVDYCYKVNLETSPKMQAEPSEYHAISSSSRQNNSAFSLTLNEFQSKKGRNYGSMNLDDLLNNFWDNEGNQVTPNSNQDVPTKEGQHSRYNNSKCAENGKGCADSSSKHRQIFEQVNGGFIKGHQNSDQMNTTNIENIENSNSASDVSEPINNSRRRSSSVSLEATVMDKRQRRMIKNRESAARSRARKQEETKKQPTKAQWIANKLRRLRRMSSVSW*
302	Nicotiana benthamiana	NBEN_5	Niben101Scf00090g02002.1		A	Niben101Scf00090	189266-192690	ATGGGAGGGTCTGGAATTAATGGGCAAGAAGTTGGTAGTGTTCAAGGTGGGAATTTACAGAGACAATGCTCTATGACTTTACCGAGGACACTGAGTCATAAGACTGTTGATGAAGTTTGGAGGGATATGTCAAAGGAATATGGTGGTGGAAAAGATGGAAATAGTGTTGGGGTGCCAACAAATTTGCCTCAGAGGCAACAAACTTTAGGGGAGATTACACTTGAGGAGTTCTTAGTTAGAGCTGGTGTTGTGAGAGAAGATGCACAGTTAGCTGCGAAATCGAATAATGTTGGAGGAATCTTTGCTGATTTGTCCTATGCTGGAAATAATACAGGAGTTGGATTTGGATACCAAGAAGTTAATAGGAACACAGGTGAAGCTGGTATTCAGGCTGCTAAT…	MGGSGINGQEVGSVQGGNLQRQCSMTLPRTLSHKTVDEVWRDMSKEYGGGKDGNSVGVPTNLPQRQQTLGEITLEEFLVRAGVVREDAQLAAKSNNVGGIFADLSYAGNNTGVGFGYQEVNRNTGEAGIQAANLPLNVNGLRSTQQQLRAQQLQQQQLQPQPQQQQPQQQPLFPKQPALAYAAPISIPNNGQLGSPGMRGGMVGISDPALNSNFVQGAALTSGGMGMVGLGAGAVTVATASPAVSSDGLGKSSGDTPFVSPLPYVFNGSIRGRKYSTVEKVVERRQRRMIKNRESAARSRARKQAYTMELEAEVAKLKEENEELQKKQEEMLEMQKNEVMEMMNLQRGAKRRCLRRTETGPW*
303	Nicotiana benthamiana	NBEN_6	Niben101Scf00107g00007.1		A	Niben101Scf00107	26143-30991	ATGGGATCTTACATGAACTTTAAGAACTTTTCTGACACGCCACAGACAGAGAGCAATGGTGGGATGTTAATGGGAAGTGGTAATTTTCCTTTGGCAAGACAATCTTCTGTATACTCGCTAACTTTTGATGAGCTCCATAGTACTTGTGGACTTGGAAAAGATCTTGGATCAATGAATTTGGAGGACTTATTGAAGAACATTTGGACAGCTGAAGAATCTAATGTTGTAGCATCTGCTGCTGGCGTTGGAAATGCGAATACGGCTGGAGGGTATTTGCAAAGACAAGGTTCTTTTACATTGCCTCGGACGCTTAGTCAGAAAACTGTAGATGAATTATGGAGAGAATTCCAGAAAGAAACAGCAGTTAGTGCTAAAGATAGAAGTGGTACGGAATGGCCA…	MGSYMNFKNFSDTPQTESNGGMLMGSGNFPLARQSSVYSLTFDELHSTCGLGKDLGSMNLEDLLKNIWTAEESNVVASAAGVGNANTAGGYLQRQGSFTLPRTLSQKTVDELWREFQKETAVSAKDRSGTEWPNLGQRQSTLGEMTLEEFLVRAGVVREDMQPTGSSNNVRFTGGLSQPSTNNNGLNIAFQQPTQNPGLFSNQFEEKNMLNVVSATSSQQKPNVAFASPMQLGTNVQLANTGAREPAVSMSSPSVNTSTIVQGSVMQGGVRGLTGLRNGVTPAKRGSPGNQLSPDMMSKKELDRSSLSPSPYAFIEGGKGRRPCNSLEKVVERRRKRMIKNRESAARSRARKQAYTLELEAEVEKLKEINEDLQKKQAEFIEMQKDQLMEKMNMPWVNK…
304	Nicotiana benthamiana	NBEN_7	Niben101Scf00113g06011.1		S	Niben101Scf00113	658581-658874	ATGGTGTGTTCTGGTCGTTTGGCGGACAGCAGCACTGGTGGAGATTGCTGCGTCACTGGTCCGTTGCTGGAGGTTGACGACGGGCTGGTGATGTTGCTGCTCGACGGAGGAAGACGCAGCAGCGTTTCAGGTGAGGGTCGTTTGGACAGGGCTCGGAGGTCACGAATGAGGAAGCAACAGCGATTGAGGGAGTTTATGAGCGAAACAACACAGCTACATAAACAGAACAGTATCTTCCGTGAGAGGATTGATTCTGTCGAGAGAAATCGTAAGAGCACAATTATACGTGATTAA	MVCSGRLADSSTGGDCCVTGPLLEVDDGLVMLLLDGGRRSSVSGEGRLDRARRSRMRKQQRLREFMSETTQLHKQNSIFRERIDSVERNRKSTIIRD*
305	Nicotiana benthamiana	NBEN_8	Niben101Scf00141g02008.1		S	Niben101Scf00141	238539-238917	ATGGCAGCGAATGTAAAAAAAAAAGCAGTGGTTGCTTCTGATGCAGACCAGCAGTATGCAAAGTTTGACGAAAGGATAAAGGAAGATGGTGTGTTCTGGTCGTTTGGCGGACAGCAGCACTGGTGGAGATTGCTGCGTCACTGGTCCGTTGCTGGAGGTGAGGGTCGTTTGGACAGGGCTCGGAGGTCACGAATGAGGAAGCAACAGCGATTGAGGGAGTTTATGAGCGAAACAACACAGCTACATAAACAGAACAGTATCTTCCGTGAGAGGATTGATTCTGTCGAGAGAAATCGTAAGAGCACAATTATACGTGATTAA	MAANVKKKAVVASDADQQYAKFDERIKEDGVFWSFGGQQHWWRLLRHWSVAGGEGRLDRARRSRMRKQQRLREFMSETTQLHKQNSIFRERIDSVERNRKSTIIRD*
306	Nicotiana benthamiana	NBEN_9	Niben101Scf00152g18002.1		I	Niben101Scf00152	1824083-1828467	ATGGCTCAGTCTAATTCTAAGCCACCTATGAGTCACAATTTTGGTGTGGGAGCTTGTCATGTGAGGTCTTTATCTCAACCAAGCAGTTTTTTGAATAATTGCTTGCCCCCTTTGAGCCCTTTACCTCCTAGCGAGCCGTCGATGGTGTCGGCTAATGCTAATTTGAAGGACACATCCATGGAGGAAGTAGATGTGAATTGTCAAGTTCCAAAAGTTGTGTCCAACTTTGTAAGGGAAAATGCGTTGCGGGGTAGTGACAGTCTTCCTCCTCGGAAAGGACATCGTCGATCTAATAGTGATGTTCCATTAGGATTCTCGGATATGATTCAGACTTCGCCTCAGTTGATGCCCATAAGCGGGCAGAGAATTTCAGGGAGACCAGTGAATCTTGGGGATATC…	MAQSNSKPPMSHNFGVGACHVRSLSQPSSFLNNCLPPLSPLPPSEPSMVSANANLKDTSMEEVDVNCQVPKVVSNFVRENALRGSDSLPPRKGHRRSNSDVPLGFSDMIQTSPQLMPISGQRISGRPVNLGDISGREKTIDLQKQPMCLSNNGRIDVEGIGERKSRGEVTDELLFSCMNLENIEALNSSGTEDRDKGSMVSGTKVSGNESSNNEAESLSKGNNVSSQLTSLREGIKRSADADIAPTMRHFRSLSMDSAIGGFHYGDESPKLPASLVNHSGQLSPSNSGNESSSQRNFDFGNAEFSEAEMKKIIADERLAEIAVADPKRAKRILANRQSAARSKERKLRYISELEYKVQKLQTETTTLLTQVTILQKDFTELSSLNSELKFHVQAMEQQA…
307	Nicotiana benthamiana	NBEN_10	Niben101Scf00202g07004.1		S	Niben101Scf00202	724741-725253	ATGGCTTCATCAAGTGGAACATCATCAGGGTCATCATTATTTCTTCAAAACTCAGGCTCAGAAGAAGATCTTCAGCAATTAATGGATCAAAGGAAGAGAAAAAGAATGATATCAAACAGAGAATCAGCTCGAAGATCAAGGATGAGAAAACAGAAACATTTGGATGATTTAATGGCTCAAGTTGCAACACTAAGAAAAGAAAATAACCAGATTTTGACAAGTATGAATGTTACCACACAACATTATCTTAATGTTGAGGCTGAAAATTCAATCTTGAGAGCTCAATTAGCTGAATTAAATCACAGGCTTGAGTCACTCAATGAAATTATTGCTTTCGTGGATGCCAACAACAATTGTAATGGTTTTGGTAATATGGACCATAATCAAGAAGAGCCTTAT…	MASSSGTSSGSSLFLQNSGSEEDLQQLMDQRKRKRMISNRESARRSRMRKQKHLDDLMAQVATLRKENNQILTSMNVTTQHYLNVEAENSILRAQLAELNHRLESLNEIIAFVDANNNCNGFGNMDHNQEEPYSFNFAQNEPMVDGFNMTNSWNYLCANHPIMTADVLQY*
308	Nicotiana benthamiana	NBEN_11	Niben101Scf00245g05008.1		M	Niben101Scf00245	522893-528532	ATGGAAGATAAACGTAAAAGATCTGAGCCTGAATTAGCTTTGTCTCTTAAAAGTCCAACTGATAATCAAGATGAATTATCAGTTAATAGGCGTAAGGTTCCTCTGACTCTTGATCAAGCAATTGATTTTGAACTGAACAAGCTTGGTCGAAATGTTGATTCTGACGTGGATTTGAAGAAGCTTAGAAGGACTGTATCAAATCGATTATCTGCGCAAAGATCTAGGATTAAGAAGACTGAATACATCACTGAGTTGGAAAAGAAGGTGAAAGACCTCCAGAAAATGGAAGATAAACGTAAAAGATCTGAGCCTGAATTAGCTTTGTCTCTTAAAAGTCCAACTGATAATCAAGATGAATTATCAGCTAATAGGCGTAAGGTTCCTCTGACTCTTGATCAA…	MEDKRKRSEPELALSLKSPTDNQDELSVNRRKVPLTLDQAIDFELNKLGRNVDSDVDLKKLRRTVSNRLSAQRSRIKKTEYITELEKKVKDLQKMEDKRKRSEPELALSLKSPTDNQDELSANRRKVPLTLDQAIDFELNKLGRNVDSDVDLKKLRRTVSNRLSAQRSRIKKTEYITELEKKVKDLQDTIAFLSPEIENHKEKQSTLRM
309	Nicotiana benthamiana	NBEN_12	Niben101Scf00301g03001.1		D	Niben101Scf00301	364542-370318	ATGGGATCTTATTCAACAGAAGAAGAAGATAAGCTTTTTATTGGAGTTGGTGTTGGAGTTCATTTCATGGCTTCCTCAAACAAAAACAATGACGACCTTTTACTAAATAATAATAGTCAAATTTCATTTGGAAGCCAACAACAGTTTTTTCATAGTTCTCAGCAGCAACATGATCAGCACCAACTTCTAAATAATAGTAATCAGATTTCTTTTGGTCTGTTACAACAGCAGTCATCTTCTTCATCAAATCCTGGAAATTTCATAAACAAAGATAATAGTGGAGCTTATGATTTGGGAGAACTAGATCAAGCACTTTTTCTTTATCTTGATGGACAAGAGCCTTCTTCAATCCAAGATCAAAGACAGAATTCTGGGTTGAGGCCACCAACTCTCAACATT…	MGSYSTEEEDKLFIGVGVGVHFMASSNKNNDDLLLNNNSQISFGSQQQFFHSSQQQHDQHQLLNNSNQISFGLLQQQSSSSSNPGNFINKDNSGAYDLGELDQALFLYLDGQEPSSIQDQRQNSGLRPPTLNIFPSQPMHIEPSSTKVNNGLVSQETSGSKKSSQPSIAKTDVVPSASGPEPPKTAKREGIRKGPTSSSEQDAPKTPDPKTLRRLAQNREAARKSRLRKKAYVQQLESSRIRLAQLEQEIQRARSQGFYVGGNALQAGEQGLAVNMANISSDAAIFDLEYARWLEEHHRLMCELRDAVQEHLQENELRIYVENCITHYDEIMNLKCMLAKSDVFHLVSGLWKTPAERCFLWMGDFRPSELLKIILSQIEPLTENQLMGICGLQQSTQEA…
310	Nicotiana benthamiana	NBEN_13	Niben101Scf00332g08008.1		S	Niben101Scf00332	796425-796841	ATGTCAGCTTTAAGGCAGAGTGCTTGTTCATCTACATCAGAAGATGATCAAAGGTATGCAGGAATAGATGAAAAGAAGAGGAAAAGGATGATTTCTAACAGGGAATCCGCGAGGCGCTTGAGGATGAAGAAGCAAAAGCTTCTGCAAGATTTGACTGGGGAAGTGAGCAGATTACAGGTTGCAAACAAGAACATTGTGGCTAAGATTGAAGAAACCACAGAGAGGTATACAGTTTGCACTGCAGAGAATAATGTGCTGAGGGCACAGGCAAGGGAATTGGATGATAGGCTGAGGTATTTAAATGATGTTATTGATGACACTGGTTTGGCTGTGGATGCAGCTGATCCTTTGCTGAAGCCATTGCAGATTCCTTGTTCAATGCAGCCCATTGCTTCTTCA…	MSALRQSACSSTSEDDQRYAGIDEKKRKRMISNRESARRLRMKKQKLLQDLTGEVSRLQVANKNIVAKIEETTERYTVCTAENNVLRAQARELDDRLRYLNDVIDDTGLAVDAADPLLKPLQIPCSMQPIASSGLFKF*
311	Nicotiana benthamiana	NBEN_14	Niben101Scf00383g04002.1		S	Niben101Scf00383	440385-440819	ATGGCTTCTTCTCCTAGTGGAACATCTTCAGGGTCAGAGGATATTCAGCAACTAATGGACCAAAGAAAACGCAAAAGAATGATATCAAACAGGGAATCAGCAAGAAGATCAAGAATGAAGAAGCAAAAGCATTTGTGTGATCTAATGGTTCAAGTGAATCAACTCAAGGATCAAAATAATCAAATTGTAACAAACATAAACATGGTGACTCAGGTTTGTTTGAATGTGGAAGCAGAAAACTCTGTTCTTAGAGCACAAATGGCAGAATTAAGCCACAGGCTTCAGTCCCTAAACGAGATCATAAACTGCATAAACTCAGCAGCAACAATAATTGACGACACAGAGGTTAATGGTGAAGATGATTTCTTGAATCCTTGGAATTTGCTACATGTGAATCAG…	MASSPSGTSSGSEDIQQLMDQRKRKRMISNRESARRSRMKKQKHLCDLMVQVNQLKDQNNQIVTNINMVTQVCLNVEAENSVLRAQMAELSHRLQSLNEIINCINSAATIIDDTEVNGEDDFLNPWNLLHVNQPIMASADVLMY*
312	Nicotiana benthamiana	NBEN_15	Niben101Scf00393g02001.1		A	Niben101Scf00393	188703-198209	ATGGGATCTCAGGGTGGTGGTAGTACTAGTATGGGTGCAACTCAAGCACAAGACCCAAAGCCAAATGCTTTGGCTAGGCAAGGATCGTTATATAGCCTCACACTTGATGAGGTTCAGAATCAATTGGGGGATTTGGGGAAACCACTAAGCAGTATGAATCTTGATGAGCTTCTTAAGACTGTATGGACTGTTGAGGCTAGTCAAGGAATGGGGGGAACGGATTACGGGGCGCTGCAGCATAGCCAGGTTGCTTCGGGGAGTTCTTTGCATCGACAGTCGAGCATTACACTAACCGGTGATCTATGTAAGAAGACTGTTGATCAGGTTTGGCAGGATATTCAGCAGGGGCAGAAAAGGGATAATAGTGATAGGAAAACTCAGGAGCGGCAGCGTACTCTT…	MGSQGGGSTSMGATQAQDPKPNALARQGSLYSLTLDEVQNQLGDLGKPLSSMNLDELLKTVWTVEASQGMGGTDYGALQHSQVASGSSLHRQSSITLTGDLCKKTVDQVWQDIQQGQKRDNSDRKTQERQRTLGEMTLEDFLVKAGVDIQQGQKRDNSDRKTQERQRTLGEMTLEDFLVKAGVVAEPTPGKRSSSGSGLGADSMALPQQQAQWSHYAIPQIPPQQPQQQNMLPVFMPGHPVQQPLAVVADPIMDAAYPESQMTMSPTALLGTLSDTQTLGRKRVAPEDMVEKTVERRQKRMIKNRESAARSRARKQAYTHELENKVSRLEEENERLKRRKEIEKVLPSVPPPEPKYQLRRTSSAPF*
313	Nicotiana benthamiana	NBEN_16	Niben101Scf00447g03001.1		G	Niben101Scf00447	415024-424622	ATGGGAAACAGTGAGGACGGGAAACCTTCTAAGCCTGAGAAATCGTCTTCGCCTACACCGGACCAGAGCAATCTCCATGTCTATCCTGATTGGGCGGCCATGCAGGCGTATTATGGTCCTCGAGTAGCTGTACCTACATATTTCAATTCAGCCGTTGCACCTGGTCATGCCCCTCACCCTTATATGTGGGGGCCACAGCCTATGATACCACCTTATGGTGCACCATATGCAGCAATATATGCTCATGGTGGCGTTTATGCACATCCTGGAGTTCCAATTGGATCTCACCCTCCAGGTCATGGGATGGTAACATCTCCTGCTGTCAGCCAACCCATGGATGGTGCTTCTTTGAGTTTGGATGCATCTGCTAAGTCTTCAGAGAATTCTGATCGAGGCTTG…	MGNSEDGKPSKPEKSSSPTPDQSNLHVYPDWAAMQAYYGPRVAVPTYFNSAVAPGHAPHPYMWGPQPMIPPYGAPYAAIYAHGGVYAHPGVPIGSHPPGHGMVTSPAVSQPMDGASLSLDASAKSSENSDRGLLAMSLGNGSADNIEGGADHGNSQSGDTEGSTDGSDTNGAGVSERSKKRSRETTPDNSGDSKSHLRRCQPTGEVNDDSEKTIVAVRHGKVGAKVMGTVLSPSMTTTLDMRNPASTHLKASPTNVSQLSPALPNEAWLQNERELKREKRKQSNRESARRSRLRKQAEAEELAIRVQSLTAENMTLKSEINKLMENSEKLKLENAALMERLKNEQPGQTEEVSLGKIDDKRLQPVGTANLLARVNNSGSLDRANNESEVYENNSSGAKL…
314	Nicotiana benthamiana	NBEN_17	Niben101Scf00466g04027.1		I	Niben101Scf00466	410683-415167	ATGGGTGGTGACAATGAGGAAGGAAATAGCGATATGGTGCAAAGACTTCAATCATCATTTGGTACATCATCTTCTTCACTCCCTAAACAACATCAATCTTTATTATCAATGAACCAATTGGACATACCTCAATTGACTAGTAGTTCCCAATTTCGTGGTCAAATGAAGCAGTTTTCCCCCAATTTTAGTGTTGAAAATAGTACTTCTAAAAGAGTAGGCATACCGCCTTCTCACCCTCAAATGCCCCCTATTTCACCTTACTCTCAGATCCCTGTGACAAGGCCTGTGAATCAGCAAATGGGAATGCAGAATTTTACTAGTCCAGGGCCATCTCATTCACGACCTTTATCACAACCGTCGTTTTTCTCATTGGATTCTTTGCCACCCTTGAGCCCTTCA…	MGGDNEEGNSDMVQRLQSSFGTSSSSLPKQHQSLLSMNQLDIPQLTSSSQFRGQMKQFSPNFSVENSTSKRVGIPPSHPQMPPISPYSQIPVTRPVNQQMGMQNFTSPGPSHSRPLSQPSFFSLDSLPPLSPSPYRESSSTSMSDPISADVSMGDQDGNSHSLLPPSPFTRCNSSRAGESLPPRKAHRRSNSDIPFGFSAMMQSSPPLVPLRSPGSLERSVPSREKPIQLVKREAMWDKGNDSNAEGMGERKSEGEVVDDLFSAYMNLDNIDALNSSGTDDKLGNENREDLDSRASGTKTNGGDSSDNEATSSVNDSGSSMQRLGISSSVEKKEGIKRSAVGDIAPTTRHYRSVSMDSFMGKLNFVDDSPKLPPSPGPRPGQLSPTSSLDANSNSFSLE…
315	Nicotiana benthamiana	NBEN_18	Niben101Scf00478g02010.1		C	Niben101Scf00478	238788-247723	ATGGAGAAAAAAATGGCTAACTTTGCAAATATTAGAGACATGAAGAAAAGTCCTTCTTTATTGGCTTTAGAAGAGTATTTCAAAACTGGTGATGGTTTCGGAGGTATTGATCATCATCAATATATCAATAATAATAATAATAATAATATTAATGACGACGACAACAACAATAATGCTCATGCTGATATTTTTGGTGATATTTGTTCTGTTGCTCCTTCATTTACTATGAGTAATCAGGAGATGGTAAATGGTTTCTCAAATTGCGCACTGACAGACAAGCCCCTTTGGTCTCCAAACCTTACTCCCAAGTCCTGCATTTCTGCAACTGTGGATTCACAATCTTCAATATGTGCTGGGAGTCCAACGCCAACTATAATGCCTAAGATGAGGGACAGTCCA…	MEKKMANFANIRDMKKSPSLLALEEYFKTGDGFGGIDHHQYINNNNNNNINDDDNNNNAHADIFGDICSVAPSFTMSNQEMVNGFSNCALTDKPLWSPNLTPKSCISATVDSQSSICAGSPTPTIMPKMRDSPVMGATSGSYSDDDDLDGEVGPCEQSTDPLDIKRIRRQASNRESARRSRRRKQAHLADLENQVDQFRGENESLFKQLADATQQYKDALTNNRVLKSDVEALRAKVKLAEDMVARGPLTSTSLSHLLQNYLNTPQPLGTNNNNLYRLNNVSPTITVPGEDAWSAISGQNPVIGVENVNAFNRNFKNGGAMSDAVSCVSDVWSWESHVPSISK*
316	Nicotiana benthamiana	NBEN_19	Niben101Scf00481g03002.1		D	Niben101Scf00481	291170-299404	ATGGCTAGTAAGATTGGTACAGCAGGCAATAGAAGTGGTACTACTGGAATGCCAAGTTTCATTTCTCAGATACCTGTTTCTAATCCCATGGGCACAGAAGCGAACAATACAAATACTTCTAGAATGTCTGATTTTGGGGTGCTCGAGCAATATCTTGGATTCCGTATTGGAGATGGCGCTAATGTTAATCGAAGTCCGCTATTTAATTCAACATCTGCAACTAATCCAGCCGTGGGTTTTGAAGTCTCTGGAACCATCAATAGGACTTTAGCTCCTTCAAATACAAGTTTGCCTACTGCTCCTCCGAGATCTCAGACAATGTTATTGCAATCAAACCTGGTTTCAGCATCAGGCACTCATCATGAGAATTGGGGAGAGTCAAACATGGCAGATTCTGGT…	MASKIGTAGNRSGTTGMPSFISQIPVSNPMGTEANNTNTSRMSDFGVLEQYLGFRIGDGANVNRSPLFNSTSATNPAVGFEVSGTINRTLAPSNTSLPTAPPRSQTMLLQSNLVSASGTHHENWGESNMADSGSRTDTSTDMDGDDKNQLIEAGQSSDKSKEKVLDQKTLRRLAQNREAARKSRLRKKAYVQQLENSRLKLSQLEQDLQRARQQGKYISNIADQSNGVGANGPLAFDAEYSRWLEEHNKHINELRTAVNAHASDPELRSIVNNVTAHFEEVFRVKGNAAKADVFHVLSGMWKTPAERCFMWIGGFRPSELLKLLVNQLEPLTEQQLAGIYNLQQSSHQAEDALSQGMEALQQSLAETLANGSPTPEGSSGDVANYMGQMAMAMGKLGTL…
317	Nicotiana benthamiana	NBEN_20	Niben101Scf00503g08009.1		G	Niben101Scf00503	846308-854250	ATGGGAAACAGTGAGGACGGAAAACCTTCTAAGTCTGAGAAATCATCTTCGCCTACACCGGACCAGAGCAATCTCCATGTCTATCCTGATTGGGCGACCATGCAGGCATATTATGGTCCTCGAGTAGCTGTACCTACATATTTCAATTCAGCCGTTGCACCTGGCCATACCCCTCACCCTTTTATGTGGGGGCCACAGCCTATGATACCACCTTATGGTGCACCATATGCAGCAATATATGCTCATGGTGGCGTTTATGCACATCCTGGAGTTCCAATTGGAACTCACCCTCCAGGTCATGGGATGGCAACGTCTCCTGCTGTCAGCCAAGCCATGGATGGTGCTTCTTTGAGTTTGGATGCATCTGCTAAGTCTTCAGAGAATTCTGATCGAGGCTTG…	MGNSEDGKPSKSEKSSSPTPDQSNLHVYPDWATMQAYYGPRVAVPTYFNSAVAPGHTPHPFMWGPQPMIPPYGAPYAAIYAHGGVYAHPGVPIGTHPPGHGMATSPAVSQAMDGASLSLDASAKSSENSDRGLLAMSLGNGSADNIEGGTDHGNSQSGDTEGSTDGSDTNGAGVSERSKKRSRETSPDTSGDSKTHLRRCQPTGEVNDDSEKTTVAVRPGKVGEKVMGXNDDSEKTIVAVRHGKVGEKVMGTVLSPSMTTTLDMRNPASTHLKASPTNVSQLSPALPNEAWLQNERELKREKRKQSNRESARRSRLRKQNERELKREKRKQSNRESARRSRLRKQAEAEELAIRVQSLTVENMTVKSEINKLMDNLEKLKLENAALMERLKNEQLGQTE…
318	Nicotiana benthamiana	NBEN_21	Niben101Scf00508g09012.1		I	Niben101Scf00508	954708-958993	ATGTATTACCTGATTCTGATGGCTCAGCCTAATTCTAAGCCAAATATCAGCCATAATTTTGGTGGGGGAGCTTCTCATACAAGGTCTTTATCTCAACCGAGTATTTTCTCAAACAATGGCCTTCCCCCATTGAGCCCGTTTCCTCATAGTGAGTCATCTATGGCATCAGCCAACTCTAGTTTGAAGGACACATCGATGGAGGAAGTTGATGTTAGTTCCCGAGGACCACCATTTGTCTCCTCTTCAACAAGGGAAAACACATTTCAATGTAGTGATAGTCTTCCTCCTAAGAAAGGACATCGTCGCTCTAATAGTGATGTTCCGTTGGGATTCTCAGCTATGATTCAGTCTTCACTGCAGTTGATGCCCATAAGTGGCCAGGGAGTTCTGGGTGGAGCA…	MYYLILMAQPNSKPNISHNFGGGASHTRSLSQPSIFSNNGLPPLSPFPHSESSMASANSSLKDTSMEEVDVSSRGPPFVSSSTRENTFQCSDSLPPKKGHRRSNSDVPLGFSAMIQSSLQLMPISGQGVLGGATLLGDPLRKKSGGEVVDKLSSYMNLENMEALNSSITEDKVKDSIASRTKLTGGNSSNRKAESVSKGTSIKRSADADITRSTRHFRSLSMDSAVGSFHYGDESPKLPTSLVNCPGKLSSSSSGNDNSDKINFDLGNGEFSEAEMRKIMADERLAEIVVSDLKRAKRILANRKSAARSKERKLRYISELEHKVQTLQTEATTLSAQVTVLQKDFTELTSLNNELRFRLQAMEQQAQLRDCIYPSLPRGERLYDPSTMVAFTLHEALTA…
319	Nicotiana benthamiana	NBEN_22	NBEN_bZIP.Niben101Scf00579.1		S	Niben101Scf00579	269743-271429	ATGGTGTGTTCTGGTCGTTTGGCGGACAGCAGCACTGGTGGAGATTGCTGCGTCACTGGTCCGTTGCTGGAGGTTGACGACGGGCTGGTGATGTTGCTGCTCGACGGAGGAAGACGCAGCAGCGTTTCAGGTGAGGGTCGTTTGGACAGGGCTCGGAGGTCACGAATGAGGAAGCAACAGCGATTGAGGGAGTTTATGAGCGAAACAACACAGCTACATAAACAGAACAGTATCTTCCGTGAGAGGATTGATTCTGTCGAGAGAAATCGTAAGAGCACAATTATACGTTATATCGGATTGAGCACCCTTCATGTTGATAATGATTTCAGCCACCACGACGAAAATAATAACATAGCGCCAGGGAACGACGTACCTCCAGTCTATCTCGATGGAGTTCCG…	MVCSGRLADSSTGGDCCVTGPLLEVDDGLVMLLLDGGRRSSVSGEGRLDRARRSRMRKQQRLREFMSETTQLHKQNSIFRERIDSVERNRKSTIIRYIGLSTLHVDNDFSHHDENNNIAPGNDVPPVYLDGVPAADPIDVSQM*
320	Nicotiana benthamiana	NBEN_23	Niben101Scf00592g06001.1		A	Niben101Scf00592	621453-623598	ATGTCATCATCCACATCTTCATCTCTTACACCTACTAGCAATAACTATAGACTTAATAATAAAACCATGGAAGAAGTTTGGAAAGACATAAATCTGTCTTCTCTAAATGACCACACTACTACTTCTGGAGATCATATTGATCCACAACAAAATACTAGTAATTCTACCAATTTTGGCGGCATGATTTTACAAGATTTCTTGGCCAGCCCATTTGCTAATAACCCTAAAACAGCAGCAAAAGGCTATGTCTCCCCTATTATTCTTCCTCCTCCTCCTGCTGCTGTTACTGTGTTGACATTAAACTCTGGCCCTGGACTTCATTTCTTTGGTAACTTAAGGCAAAACTCAACTTCTCAGCAGGAAAAATCTATTTCTAATAGGTCATTTGAGGCTTTGGCT…	MSSSTSSSLTPTSNNYRLNNKTMEEVWKDINLSSLNDHTTTSGDHIDPQQNTSNSTNFGGMILQDFLASPFANNPKTAAKGYVSPIILPPPPAAVTVLTLNSGPGLHFFGNLRQNSTSQQEKSISNRSFEALASPVGGNTNGRKRCSESDNNSSDQKNKRMIKNRESAARSRARKQESCFPVYNLQAYTNELELKVAHLMEENVRLKKQQQQLCLATAAQLPKKMSLYRTSTAPF*
321	Nicotiana benthamiana	NBEN_24	Niben101Scf00595g05010.1		S	Niben101Scf00595	489997-490290	ATGGTGTGTTCTGGTCGTTTGGCGGACAGCAGCACTGGTGGAGATTGCTGCGTCACTGGTCCGTTGCTGGAGGTTGACGACGGGCTGGTGATGTTGCTGCTCGACGGAGGAAGACGCAGCAGCGTTTCAGGTGAGGGTCGTTTGGACAGGGCTCGGAGGTCACGAATGAGGAAGCAACAGCGATTGAGGGAGTTTATGAGCGAAACAACACAGCTACATAAACAGAACAGTATCTTCCGTGAGAGGATTGATTCTGTCGAGAGAAATCGTAAGAGCACAATTATACGTGATTAA	MVCSGRLADSSTGGDCCVTGPLLEVDDGLVMLLLDGGRRSSVSGEGRLDRARRSRMRKQQRLREFMSETTQLHKQNSIFRERIDSVERNRKSTIIRD*
322	Nicotiana benthamiana	NBEN_25	Niben101Scf00596g01005.1		D	Niben101Scf00596	120530-132075	ATGATGGCAGAGATCAGTCCTAGCACGTCAACAGATGCTGATACAGATGATAAAAACTTGAGGTTGATGAACTCTCAACCCGTGGCCAGCGTGACTTCTGATGGAAGTGACAAACCAAGAGATCAAAAGACGCTTCGCAGGCTTGCTCAGAATCGTGAAGCTGCACGAAAGAGTCGCCTAAGGAAAAAGGCATATGTTCAACAGTTAGAGAGTAGTAGAATGAAGCTGACACAGCTAGAGCAGGAGCTTCAACGAGCTCGGCAACAGGGCATATTTATTTCAAGTTCAGGAGATCAATCACAGTCAAAGACTGGAAATGGAGCTTTGGCGTTTGATGTAGAATATGCACGGTGGCTGGAAGAGCACAACCGGCGTATTACTGAGCTTAGGGGAGCTGTA…	MMAEISPSTSTDADTDDKNLRLMNSQPVASVTSDGSDKPRDQKTLRRLAQNREAARKSRLRKKAYVQQLESSRMKLTQLEQELQRARQQGIFISSSGDQSQSKTGNGALAFDVEYARWLEEHNRRITELRGAVSSHSGDGELRIIVDGILAHYDDIFRIKGDAAKADVFHILSGMWKTPAERCFLWLGGFRSSELLKLEPLTEQQLLAINNLQESSQQAEDALSQGMEALQQSLAETLAGSLGPSGSSGNVANYMGQMAMAMGKLGTLEGFIRQADNLRQQTLQQMHRVLTTRQSARALLAISDYFSRLRALSSLWLARPRE*
323	Nicotiana benthamiana	NBEN_26	NBEN_bZIP.Niben101Scf00637.1		D	Niben101Scf00637	134491-141383	ATGGGATTTGAGAGAGCTTTTGTTGAGAGTTCACCTGAGCAAGAAAATAAGCTTTTTGTTGGTGTTGGTGTTTCTTATATGGATTCTTCAAACAAAAACCGCGACCCATTAGAGAGTAATAATCAGATTTCTTTTGGAGGTCAGCATCCACATCATCAACAACAGCTTTTTTATAATCGTCATCAGCAACAGCAGTTGCAAAATAATAATCAGATATGTTTTGGGATGATGCAACAGTCATCTTCATCATCTTCTGCTATTCCTGGAAGTCTCGTAAGCAAAGACAGTGCCAGAGCTTATGATTTAGGTGAACTAGATCAAGCACTTTTTCAGTATTTTGATGGCCAAGACCCTTCATCAATCCAAGAACAAAGACGTATGAGACCACCAACTCTGAAC…	MGFERAFVESSPEQENKLFVGVGVSYMDSSNKNRDPLESNNQISFGGQHPHHQQQLFYNRHQQQQLQNNNQICFGMMQQSSSSSSAIPGSLVSKDSARAYDLGELDQALFQYFDGQDPSSIQEQRRMRPPTLNIFPSQPMHVEPSTTNKMNTGLVSTAISGSKRSSHPSKELSDNLKNNDAPSASGPEPPKAAKREGNRKGPTSSSEQDGPKTPDPKTLRRLAQNREAARKSRIRKKAYVQQLESSRIRLTQLEQELQRARAQGYYFGGNSLLGGEQNLPVNMANMSSDAAVFDMEYARWLEEHHRLMCELRNAVQEHFPENELRIYVDNCVTHYDEIMNLKSMLTKSDVFHLVSGMWKTPAARCFMWMGGFRPSELLKIILSQIEPLTEQQLMGICGL…
324	Nicotiana benthamiana	NBEN_27	Niben101Scf00646g06011.1		A	Niben101Scf00646	635315-640516	ATGGCCGTGATGTGGGACCCAGTAAGACTGTGGATGAGGTGTGGAGGGAAATTGTATCAGGGGGTGGGGTTGGAGGTGTGGAGGGAAATTGTATCAGGGGGTTCGGGTGGGGGTGGAGGTGGAGGAGGGAGTGGTAGGGAGCCAGAGATGACTTTAGAGGATTTTCTGACCAAAGCTGGGGCGGTTACAGAGGAGGACGTTAGAGTCCCGGCGATCTCTCCGCCGCCAGCCACGGCGGCGCCAGCTGCTGGAGGGTTTGTGGTGGATAACATGGGGAATTGTCAGTTTCCGATGGGCATGCAGAATGGACCCCACATGGGATTTGGAAATGGGTTTGTGGCTATTGCTGGGAGTGGGAGCGGGAGTGGTGGTAGTGGGAGAGGGAAGAGGAGGTCAACT…	MAVMWDPVRLWMRCGGKLYQGVGLEVWREIVSGGSGGGGGGGGSGREPEMTLEDFLTKAGAVTEEDVRVPAISPPPATAAPAAGGFVVDNMGNCQFPMGMQNGPHMGFGNGFVAIAGSGSGSGGSGRGKRRSTVEELPLDKATQQKQRRMIKNRESAARSRERKQAYTVELESLVTQLEEENAKLLKEEAEKNKERLKQVADSGNVKQFMND*
325	Nicotiana benthamiana	NBEN_28	Niben101Scf00687g08008.1		S	Niben101Scf00687	934510-936775	ATGGCTTCCACCCAGCAAGCGGTGAGTTCTGCTTCTGATGCAGACCAGCAGTATGCAAAGCTTGACGAAAGGAAAAGGAAGAGAATGGAATCCAATCGTGAGTCTGCTCGTAGGTCACGGATGAGGAAGCAACAACTATTGGGAGAGTTGATGAGCGAAACAACACAACTACATAAACAGAACAGTATCTGCCGTGAGAGGATTGATTCTGTCGAGAGAAATTATCGTGCGATGGATGCAGAGAACAATGTGTTGAGAGCTCAGATTGCTGAATTAACTGAACGTTTGAATTCATTGAACTCGCTCACTCAATTTTGGGCTGATGCTAATGGATTTCCTGTGGAACTCCCTGAAATTCCCGACACATTGCTTGAGCCATGGAAGTTGCCTTGCCCTATT…	MASTQQAVSSASDADQQYAKLDERKRKRMESNRESARRSRMRKQQLLGELMSETTQLHKQNSICRERIDSVERNYRAMDAENNVLRAQIAELTERLNSLNSLTQFWADANGFPVELPEIPDTLLEPWKLPCPIQPIDASSGMLLF*
326	Nicotiana benthamiana	NBEN_29	Niben101Scf00773g06006.1		I	Niben101Scf00773	590791-596592	ATGCAAGATCCGTCAAATCCAAACTCCAAGAACCAAACGCCGTCAATTTCAGCTACATTCAGGCCATCTCACCACCGGCGAGCTCATTCTGAAGTGAACTTCCGGCTACCTGAGGATCTAGATCTAGTATCCGACCCATTCGATGCGTCCGCTGGGAGTTTCGAGGAGATCGGATCCGAGGACGATTTCTTCTCCACTTACATGGACATTGAGAAACTCGGCACCGGATCCAACCCTACCGTTGGATTCAACAATGCTCCCGGAAGTAGTAGTGGACTACTGGTAGCTGACGGAGAGAAGACTTTCAGTAGGCCACGTCATAGGCATAGTAATTCTGTGGATAGTTCAAGTTTGTTGCTAAGTGAGAGTATTGAAGCTAAGAAAGCTATGGCTCCAGAT…	MQDPSNPNSKNQTPSISATFRPSHHRRAHSEVNFRLPEDLDLVSDPFDASAGSFEEIGSEDDFFSTYMDIEKLGTGSNPTVGFNNAPGSSSGLLVADGEKTFSRPRHRHSNSVDSSSLLLSESIEAKKAMAPDKLAELWTIDPKRAKRILANRQSASRSKERKARYITELERKVQTLQTEATTLSAQLTLFQRDTTQFTNENTELKIRLQAMAQQAQLRDALNEALKQEVERLKMATGEMSSSSDAYNLGMQHIPYNQSAFFSHQTQSGPSESQNIQMQQFHSLQDSLLTPHRRLLAGHGQALPDTMQQDPLGRFQGLDIGGRGMHHVKTETPSISASESSSTL*
327	Nicotiana benthamiana	NBEN_30	NBEN_bZIP.Niben101Scf00862.1		A	Niben101Scf00862	355924-381132	ATGAATGATCAAGAGAGAAAGCCAACTCTTGGCGAGACAACTTTGGAGGACTACTTGGTGAAAGCTGGGCTTTTCGGTGCGGATGCTTCTTTAGGACATACAATGTCATTGGATAATCCTACGGCAGCGCAAAATTTTGTGCCGTCGATAGGCTTGTCACCATCTCCTTCGATTGATGCGCTGTCTGATACGCCGGTCTCTGGTCGAAAGAGGGATGCTACGGATTTTGATAAGACTCTTGATAGGAGACTAAGGAGAAAGATCAAGAATAGAGAGTCAGCTGCACGCTCTCGAGCCAGAAAACAGGCTTACCAGAATGAGCTCGTGAACAAGGTCTCACTTCTGGAAGAGGAGAACATGAAGCTTAAGAAAGAGAAGGAGCTAGAGAAGATGTTATCC…	MNDQERKPTLGETTLEDYLVKAGLFGADASLGHTMSLDNPTAAQNFVPSIGLSPSPSIDALSDTPVSGRKRDATDFDKTLDRRLRRKIKNRESAARSRARKQAYQNELVNKVSLLEEENMKLKKEKELEKMLSELSSEPRYQLRRTSSI*
328	Nicotiana benthamiana	NBEN_31	Niben101Scf00941g04005.1		D	Niben101Scf00941	400580-405926	ATGAACATGACTTCTCCAACAACTCAATTTGCCCCCGCAAGAAGGATGGGTATATATGAACCATTTAACCAGATGAGCGTGTGGGAAGACGCGTTTAGAGGTGACATTATGCCTAGCTCTGATCCATGTATGGTTTCACAGCCAAACGACAGGCCAGATGACAAGTCGGGATATACGTCTGGTGAACAACATATGCCCTCTGGCTCCGGGGATAATCAAGCACCGAGGAGTACTTCAGAAAAGGTACAACGGCGTTTAGCACAAAATCGTGAAGCTGCCCGGAAAAGCCGTATGCGGAAAAAGGCTTATGTTCAGCAGCTGGAAACAAGCCGTTTGAAGTTGGCCCAACTTGAGTTAGAGCTCGAGAGAGCTAGACAGCAGGGACTGTACATGCTAGGT…	MNMTSPTTQFAPARRMGIYEPFNQMSVWEDAFRGDIMPSSDPCMVSQPNDRPDDKSGYTSGEQHMPSGSGDNQAPRSTSEKVQRRLAQNREAARKSRMRKKAYVQQLETSRLKLAQLELELERARQQGLYMLGSNVNIGLLGTINPGIAAFEMEYSHWVEEQQKKNAELRSILQSPVSEMELQLLVENVLSHYFNLFRMKADTAKADVFYLMSGMWRTSVERFFLWIGGFKPSDLINVVMPQLEPLTDQQIIKVCNLRHCCQQAEDALTQGMDKLQQTLAQSILNMTTGAGNYSSQMVSSMESLEALESFVNQADHLRQQTLQQMSIILTTHQAARGLLAFGEYLQRLRALSSLWAARPREPT*
329	Nicotiana benthamiana	NBEN_32	Niben101Scf00959g00017.1		S	Niben101Scf00959	139823-140365	ATGCAACCCACTGATGTCACAGACTTCTATTGCCTACTTCCTTCAAACTCAACTCAATACCCATCTCAATCCACCACTAACTACAACGCATCCACATTTCAACTTAACAGGCTCTTGAACCCTTTGTATCATCTTCAGATCACCCCTCAAGTTCAAGAGTTCAATCCACAACTAACATGCTTCAACAGTAACTCTACATCCGACGAAGCTGATGAACAACAGTTGAATCTAATAAATGAACGGAAACAGAGAAGAATGATATCTAATAGAGAGTCCGCACGGAGATCACGCATGCGCAAGCAGAGGCACCTAGACGAGCTTTGGGCACAGGTTGTCTGGCTCCGAAATGAGAATCACCAGCTCCTGGACAAACTAAATCATGCTTCTGAGCGCCAGGAT…	MQPTDVTDFYCLLPSNSTQYPSQSTTNYNASTFQLNRLLNPLYHLQITPQVQEFNPQLTCFNSNSTSDEADEQQLNLINERKQRRMISNRESARRSRMRKQRHLDELWAQVVWLRNENHQLLDKLNHASERQDQVIEENAQLKKEASELRQMITDMQLSSPCPSLRALENEPCSGLSRNE*
330	Nicotiana benthamiana	NBEN_33	Niben101Scf00960g04009.1		D	Niben101Scf00960	421692-426878	ATGAACATGAGTTCTCCATCAACTCAATTTGCCCCCACAACAAGGATGGGCATATTCGAACCTTTCCACCATATGAGTATGTGGGAAGACGCATTTAAAGGTGAGTTTATGCCCGGCACTGGTGCGTGTATGGTTGCACAGCCAAATGACAGGGTAGATGACAAGTCTGGGTATACTTCAAGCGAACAACTTATTCCCTCGGGCTCTGAGGATAATCAAGCTGGAAAGAGTGTTTCAGAAAAGGTACAACGGCGTCTAGCACAGAATCGTGAAGCTGCCCGTAAAAGCCGTATGAGGAAAAAGGCTTATGTTCAGCAGCTTGAAACAAGCCGCATGAAACTAGCACAACTTGAAATGGAGCTTGAGAGAGCTCGACAGCAGGGACTATATGTTTTAGGT…	MNMSSPSTQFAPTTRMGIFEPFHHMSMWEDAFKGEFMPGTGACMVAQPNDRVDDKSGYTSSEQLIPSGSEDNQAGKSVSEKVQRRLAQNREAARKSRMRKKAYVQQLETSRMKLAQLEMELERARQQGLYVLGSNGNMGLSATINPGIAAFEIEYGLWVEEQQKKNVELRNVLQSHVSEMELQLLVESVLSHYYNLFRMKADAAKADVFYLMSGMWRTSVERFFLWIGGFKPSELINSMNMSSPSTQFAPTTRMGIFEPFHHMSMWEDAFKGEFMPGTGACMVAQPNDRVDDKSGYTSSEQLIPSGSEDNQAGKSVSEKVQRRLAQNREAARKSRMRKKAYVQQLETSRMKLAQLEMELERARQQGLYVLGSNGNMGLSATINPGIAAFEIEYGLWVEE…
331	Nicotiana benthamiana	NBEN_34	Niben101Scf01001g02005.1		D	Niben101Scf01001	254997-267937	ATGATGGCAGATATCAGTCCTAGCACGTCAACAGATGCTGATACAGATGATAAAAACTTGAGGTTTCTAAACTCTCAGCCAGTGGCCAGTGTGACTTCTGATGGAAGTGACAAACCAAGAGATCAAAAGACGCTTCGCAGGCTTGCTCAGAATCGTGAAGCTGCACGAAAGAGTCGTCTAAGGAAAAAGGCATATGTTCAACAGTTAGAAGAGTAG	MMADISPSTSTDADTDDKNLRFLNSQPVASVTSDGSDKPRDQKTLRRLAQNREAARKSRLRKKAYVQQLEE*
332	Nicotiana benthamiana	NBEN_35	NBEN_bZIP.Niben101Scf01002.1		E	Niben101Scf01002	121628-123765	ATGGCTCAACTACCACCAAAAGTTCCTACAATGGCACACAATTGGCCTTTTCAAACTATGCCCCCATTGCATAATAATAATAATAATAATTCTTGGGTTGATGATTTTCTTGATTTCTCATCAGCTAGGAGAAATTCTCACCGGAGATCAGTGAGCGACCCAATTGCGTTCGTGGAGGCCGCTCCGTTTCTGCAGCAATGCCACGGCGGCGCTAATTCTAATATTGGGTTTGATAAGTTAGATGATGAACAGCTTATTACTATGTTTTCTGATGATAGCGGCGGTGCTGCTGCATTTGCTGTTACTACAGCGCCGTCTTCTAATCCGTCTAGTACGAATCCTTCTACACCGTCTGATCAAATCAGCGAAAATGAAGATCAGAAGTTGGTCCCACAGGTC…	MAQLPPKVPTMAHNWPFQTMPPLHNNNNNNSWVDDFLDFSSARRNSHRRSVSDPIAFVEAAPFLQQCHGGANSNIGFDKLDDEQLITMFSDDSGGAAAFAVTTAPSSNPSSTNPSTPSDQISENEDQKLVPQVDVNQVIQPKNEPGEVDSSCDTQPPPLPASDSSDNNPIVDPKRIKRILANRQSAQRSRVRKLQYISELERSVTSLQTEVSALSPRVAFLDHQRLLLNVDNSALRQRIAALAQDKIFKDAHQEALKKEIERLRQIYHEQNMKKMGNNGTTDAPPSAAAPPSTFNKMSCTEEA*
333	Nicotiana benthamiana	NBEN_36	NBEN_bZIP.Niben101Scf01072.1		S	Niben101Scf01072	60359-60652	ATGGTGTGTTCTGGTCGTTTGGCGGACAGCAGCACTGGTGGAGATTGCTGCGTCACTGGTCCGTTGCTGGAGGTTGACGACGGGCTGGTGATGTTGCTGCTCGACGGAGGAAGACGCAGCAGCGTTTCAGGTGAGGGTCGTTTGGACAGGGCTCGGAGGTCACGAATGAGGAAGCAACAGCGATTGAGGGAGTTTATGAGCGAAACAACACAGCTACATAAACAGAACAGTATCTTCCGTGAGAGGATTGATTCTGTCGAGAGAAATCGTAAGAGCACAATTATACGTGATTAA	MVCSGRLADSSTGGDCCVTGPLLEVDDGLVMLLLDGGRRSSVSGEGRLDRARRSRMRKQQRLREFMSETTQLHKQNSIFRERIDSVERNRKSTIIRD*
334	Nicotiana benthamiana	NBEN_37	Niben101Scf01150g00005.1		I	Niben101Scf01150	19777-25444	ATGGACCCGAAATTCAGCGGAAAGCCTATACCCATCCCATTTCTAGCGGGTCGGACCGACCTTGACCAGATGCCGGATACTCCGACCCGTATAGCACGTCATCGGCGGGCGCAATCGGAGACTTTCTTTCGGTTCCCGGACTTCGACGATGATATCCTCTTAGACGACGTCGTAGCCGACTTTAATCTGGATATTTCAGCGCCGTCGCTACCCCCTTCTGCTGATACTCATATGCAACCGGCCAATTCTGCTGACTCGTCGTCGACCGGTGGACCGGGCTTAATGTCCGGACCGGGCGCTAATAATAACACTAGACCGTTGAATCATTTTCGGAGTTTATCAGTTGACGCCGACTTTTTTGATGGTTTGGAGTTTGGAGCGACCACGCCGGGGGCGGCG…	MDPKFSGKPIPIPFLAGRTDLDQMPDTPTRIARHRRAQSETFFRFPDFDDDILLDDVVADFNLDISAPSLPPSADTHMQPANSADSSSTGGPGLMSGPGANNNTRPLNHFRSLSVDADFFDGLEFGATTPGAAEEEEKKVFGSGSVSGSGTRHRHSNSMDGSFSTPSFEAECSSSVKKAMAPDRLAELALIDPKRAKRILANRQSAARSKERKIRYTSELERKVQTLQTEATTLSAQITVLQRDNSGLTTENKELKLRLQALEQQAHLRDALNEALREELQRLKIAAGQIPGTNGNRGPRPHFPPQPQSFVQCGSHHAQQQQQKHLPHSTTTTQNVGGQAQPSFMNFNNRG*
335	Nicotiana benthamiana	NBEN_38	Niben101Scf01180g02009.1		I	Niben101Scf01180	254627-261567	ATGGACCCGAAGTTCGCCGGAAAGCCCATTCAGGCCCTATTCCTTTCAGGTCAAAATGACCTTGACCAGATGGAGGATACTCCGACCCGTGGGTCACGTCATCGCCGGGCCCAATCGGAAACCTTTTTCCGGTTTCCAAACTTCGACGATGACATCCTCTTAGACGACGCCGTTCCTGACTTCAACCTCGATGTTCAGGCGCCGTCCCTCATGCAGCAGCCTGCAAATTCGGCTGATTCTTCGTCAACTGGGCCGGCGCTATCAGCTGGGCCTTCCGATAATAACCCTAAGCCGCTGGCCCACTACCGTAGTCTCTCTGTGGATGCTGATTTTTTCGATGGACTGGACTTTGGTGCTGCGGCTGCGGAGAATAAGATGATGGGTGGTGGCCCGCGTCAT…	MDPKFAGKPIQALFLSGQNDLDQMEDTPTRGSRHRRAQSETFFRFPNFDDDILLDDAVPDFNLDVQAPSLMQQPANSADSSSTGPALSAGPSDNNPKPLAHYRSLSVDADFFDGLDFGAAAAENKMMGGGPRHRHSNSMDRSFDFESESLSVKKAMAPDKLAELSLIDPKRAKRILANRQSAARSKERKTRYTGELERKVQTLQTEATTLSAQITVLQRDTSGIAAENKELKFRLQALEQQAHLRDALNETLREEVQRLKLEAGQIPAANGNRGTHFHLPPQPQPFVQCGNHHPQHQQQHIPRSTASNQTVPGQSQSGIFNFNNRA*
336	Nicotiana benthamiana	NBEN_39	Niben101Scf01202g00001.1		G	Niben101Scf01202	3628-7553	ATGTGCTCATCCATCTATTCCTCCGGGATCTTACCCTTCAGCCCCTTTGCGATGCCTTCTCCAAACGGCGTTGCTGAAGCTGCAGTTAACACCTCTGGCAATGCTGAAGTAGATGGTAAATCATCGGATGGAAAGGAGAAACTGCCTATTAAAAGATCTAAGGGAAGCTTGGGTAGTTTGAATATGATTTCAGGGAAGAATAATGAACCTGGTAAAACGTCTGGAGCATCTGCAAACGGAGCCTATTCTAAAAGTGCCGAGAGTGGAAGTGACGGCTCAAGCGAAGGGAGTGATGCAAATTCTCAAAATGTGGGAGTCACCAATGAAGGCAAGATTCAGTATGACGTTTCTGCTACAGCTGAAGCATTTCAAAATGGCAATTCTGCTCATAGCTCTCAC…	MCSSIYSSGILPFSPFAMPSPNGVAEAAVNTSGNAEVDGKSSDGKEKLPIKRSKGSLGSLNMISGKNNEPGKTSGASANGAYSKSAESGSDGSSEGSDANSQNVGVTNEGKIQYDVSATAEAFQNGNSAHSSHNGGASAPHSLINQTMPIMPMCILKTQFKIVYFSYMGAAECDELAQRAEALKEENASLRAELSRLRSEHDQLAAQNASLKERLGEVPEQEDLRPSRNDIHLSKDTQNSSQTEPTQGGQ*
337	Nicotiana benthamiana	NBEN_40	Niben101Scf01202g01013.1		G	Niben101Scf01202	68510-86668	ATGGGGAGCAGTGATATTGTCAAATCCTCTAAGGAGGCAAAGGAGGCGAAGACTCCCAACTCTCAGGAGCAGGCTTCATCAACTGCCACTGGTACAGTAAATCCGGAATGGTCCGGCTTTCAGGGATATTCTCCAATGCCTCCACATGGATTCTTGGCGTCAGGTCCTCAAGCACACCCTTACATGTGGGGAGTTCAGTGTAGACTGAAGAGCCCCAAAGTCATCATGATATTTGCGAATGTTTCTAGCGGTTGCACCATCCGGCATCGTATGCCACCCTATGGTACTCCACCACATCCTTATGTTGCAATGTATCCCCATGGTGGAATATATGCTCATCCATCTATTCCTCCGGGATCTTACCCCTTCAGCCCCTTTGCGATGCCTTCTCCAAACGGC…	MGSSDIVKSSKEAKEAKTPNSQEQASSTATGTVNPEWSGFQGYSPMPPHGFLASGPQAHPYMWGVQCRLKSPKVIMIFANVSSGCTIRHRMPPYGTPPHPYVAMYPHGGIYAHPSIPPGSYPFSPFAMPSPNGVAEAAVNTSGNAEVDGKSSEGKEKLPIKRSKGSLGSLNMITGKNNEPGKTSGASANGAYSKSAESGSEGSSEGSDANSQNVAEAFQNGNSAHSSHNGGTSAPHSLINQTMPIMPMSSAGGIPGPTTNLNIGMDYWSAAASPSMPAIHGKVPSASVAGGMVTAGSRDIVQPQMWIQDERELKRQRRKQSNRESARRSRLRKQAECDELAQRAEALKEENASLRAELSRLRSEHDQLAAQNASLKERLGEVPEQEDLRPSRNDIHLSK…
338	Nicotiana benthamiana	NBEN_41	Niben101Scf01350g05009.1		S	Niben101Scf01350	548651-548944	ATGGTGTGTTCTGGTCGTTTGGCGGACAGCAGCACTGGTGGAGATTGCTGCGTCACTGGTCCGTTGCTGGAGGTTGACGACGGGCTGGTGATGTTGCTGCTCGACGGAGGAAGACGCAGCAGCGTTTCAGGTGAGGGTCGTTTGGACAGGGCTCGGAGGTCACGAATGAGGAAGCAACAGCGATTGAGGGAGTTTATGAGCGAAACAACACAGCTACATAAACAGAACAGTATCTTCCGTGAGAGGATTGATTCTGTCGAGAGAAATCGTAAGAGCACAATTATACGTGATTAA	MVCSGRLADSSTGGDCCVTGPLLEVDDGLVMLLLDGGRRSSVSGEGRLDRARRSRMRKQQRLREFMSETTQLHKQNSIFRERIDSVERNRKSTIIRD*
339	Nicotiana benthamiana	NBEN_42	Niben101Scf01442g01009.1		J	Niben101Scf01442	116836-122106	ATGAACTACGAAGAGATACACAAAACGGCGCTGTGCGCGGCGGACGGTAGGTTTTCCGATGATGAACTGGTGGAATGTGAGTGGGAAGCGGCGGAGGCGTTGGCTTGTTTGTCTCATCCGGTGACTGGTGATGTTCACCTCTGCATGGACGCTTGGGATGCAGCTGGCTTATATTCCACAACTTCAGCGATGCTCTTGTTTATACAGGAGCAAGAAATAGCCATTCGATCTGAGGATGAATCTGAACTCGATACAAGTCCTCTATGTGCTTCAAATTATCCACCAGTTACAAGCGGCAAATCGAGGCAGGATTTGACTGAGGCGGAGAAGGAAGGACGGAGGCTGCGCCGTGTATCTGCAAATAGAGAATCTGCGAGGCAGACAATTCGCCGAAGACAG…	MNYEEIHKTALCAADGRFSDDELVECEWEAAEALACLSHPVTGDVHLCMDAWDAAGLYSTTSAMLLFIQEQEIAIRSEDESELDTSPLCASNYPPVTSGKSRQDLTEAEKEGRRLRRVSANRESARQTIRRRQAMQEELRRKAADLALENKNLKKNKELAAAEYSSLRNKNNSLKTQMDKIVKAEVQETDDESKLTPVGTPSTSTTFPTFLHNQTQATLFFWSFQSVDDLPLQSGSQSISGIAQQLHTPLGEFKTSDKLESPTMMSKPETPLYILAFPCPMPFHAQSNSFYPPSTNHNDQHETSVVHECSSTSTPRTTVNMENHLTTAPLKVEVETTDSIDAIHGDILREAESGYLLNVGASEGSGKLLGVRSKRMFQMTVTSSPSIQPVIARQSDYPQ…
340	Nicotiana benthamiana	NBEN_43	Niben101Scf01607g03007.1		E	Niben101Scf01607	370042-373717	ATGGCACACTTACCTCCAAGAATTCCAAACACGAGACCAAATTGGCCTGATTTTTCACTTCAAAAATTGGACAACTTATCTCCCAATGCAACTGCTGCTCACAATAACCCTTTATGGGCAGACGAATTCCTCGATTTCTCATCGAAACGTGGGTCCCACCGGAGATCGATGAGCGACTCCATTGCTTTCTTGGAGACACCCATGGTTGAAGAATGCAGAAGGCTATCATCAACTCCAGGTTCGGGTGGGACCAGTACTGGTAACCAGGAATTTGAGAGGTTTGATGATGAGCAGCAAATCATGTCCATGTTTAATGACGACGAACACGACAATATATCGTGTTCGACCCCTCAATCGCCGTCTGATTACATCAACGTTAATGAAGATAATAAAAGGATG…	MAHLPPRIPNTRPNWPDFSLQKLDNLSPNATAAHNNPLWADEFLDFSSKRGSHRRSMSDSIAFLETPMVEECRRLSSTPGSGGTSTGNQEFERFDDEQQIMSMFNDDEHDNISCSTPQSPSDYINVNEDNKRMNVAGGYRDGQMQQLNEEVQSSCKTNEEPAATHASIEYSCEKVVDPKRIKRILANRQSAQRSRVRKLQYVSELERSVSTLQAEVSVLSPRVAFLDHQRLVLNADNSALRQRIAALAQDKLFKDAHQEALKREIERLRQIYYQQNLKQIENGTQSKSQPPVADSSAAEMKVQLVN*
341	Nicotiana benthamiana	NBEN_44	Niben101Scf01611g00004.1		St	Niben101Scf01611	52577-61169	ATGATGGCGGTGACATTGGCCTATAAAGACAGTAAAATGGGGATGGACAATGGGAAATATGTGAGGTACACTCCAGAGCAGGTTGAGGCTTTGGAGAGATTATATCATGAATGTCCAAAGCCCAGTTCACTCCGTCGTCAGCAGCTGATTCGGGAGTGTCCAATTCTATCCAACATCGAGCCAAAACAGATCAAAGTTTGGTTTCAGAATAGAAGATGTAGAGAGAAGCAACGTAAAGAATCGTCGCGCCTTCAAGCTGTGAACAGAAAATTGACAGCAATGAATAAGCTGTTGATGGAGGAAAATGATAGGCTGCAGAAGCAAGTTTCACAGTTGGTGTATGAGAATAGCTTTTTCCGGCAACAGACTCAAACTGCTGCCCTTACCACCACAGACAAC…	MMAVTLAYKDSKMGMDNGKYVRYTPEQVEALERLYHECPKPSSLRRQQLIRECPILSNIEPKQIKVWFQNRRCREKQRKESSRLQAVNRKLTAMNKLLMEENDRLQKQVSQLVYENSFFRQQTQTAALTTTDNNSCESVVTSGQQNLSAQRPPRDASPAGLLSLAEETLTEFLSKATGTAVEWVQMPGMKPGPDSIGITAISHSCSGVASRACGLVGLEPTRVAEILKDRPSWFRDCRAVDVLNVMSTGSGGTIELLYMQLYAPTTLAPARDFWLMRYTSVMEDGSLVVCERSLNNTQNGPSMPPVQNFVRAELLPSGYLIRPCEGGGSIIHIVDHMDLEPWSVPEVLRPLYESSTVLSQRTTMAALRHLRQISQEISHPTVTGWGRRPAALRALGQRL…
342	Nicotiana benthamiana	NBEN_45	NBEN_bZIP.Niben101Scf01664.1		A	Niben101Scf01664	611203-617652	ATGTGGTCATCAACCAGTAGCAGAGGCATTTCATCATCTTCTTCTTCTTCCAAATCATCATCTTCTACTTCTTCTTCTTCATCTCGTTCCCCATTTTCTCCTTCAAATCATCACCTAAATCCAAGACATAAAACTATGGAAGAAGTTTGGAAAGACATTAATCTTTCTTCACTTCAAGACCATACCACTACTTACTCTAGAGATCATGATCATCATCAAACTGCTAATTTTGGTGGTATGATTTTACAAGATTTCTTGGCGCGGCCTTTTGCTACTGACCTTCAACCACCGGCTGCAGCCTCTCCTATTCCGGCTACTACTATGCTGAATTTGAACTCAGTTCCAGAGCTTCATTTCTTTGGTCAAAACTCAACGTTGCACCCACCAACACCTATTTCT…	MWSSTSSRGISSSSSSSKSSSSTSSSSSRSPFSPSNHHLNPRHKTMEEVWKDINLSSLQDHTTTYSRDHDHHQTANFGGMILQDFLARPFATDLQPPAAASPIPATTMLNLNSVPELHFFGQNSTLHPPTPISRLPFEGLASSAANGRKRSPEIENNSAGDSRNKRMIKNRESAARSRARKQESLYKRVGARSCPFVRRKCQAQEAAATGLDNLLRPSKGNEDVDPGVERDDAEILEGDVWGMDEEGDESEV*
343	Nicotiana benthamiana	NBEN_46	Niben101Scf01685g04006.1		S	Niben101Scf01685	446065-446358	ATGGTGTGTTCTGGTCGTTTGGCGGACAGCAGCACTGGTGGAGATTGCTGCGTCACTGGTCCGTTGCTGGAGGTTGACGACGGGCTGGTGATGTTGCTGCTCGACGGAGGAAGACGCAGCAGCGTTTCAGGTGAGGGTCGTTTGGACAGGGCTCGGAGGTCACGAATGAGGAAGCAACAGCGATTGAGGGAGTTTATGAGCGAAACAACACAGCTACATAAACAGAACAGTATCTTCCGTGAGAGGATTGATTCTGTCGAGAGAAATCGTAAGAGCACAATTATACGTGATTAA	MVCSGRLADSSTGGDCCVTGPLLEVDDGLVMLLLDGGRRSSVSGEGRLDRARRSRMRKQQRLREFMSETTQLHKQNSIFRERIDSVERNRKSTIIRD*
344	Nicotiana benthamiana	NBEN_47	Niben101Scf01689g07011.1		C	Niben101Scf01689	717701-719540	ATGGCAAGTTTATCTGGTTATAATCCTAATATCTTGTGCCAACACATTGACAGAATGCTATCCAACAGAGAATCAGCTAGACGCTCCAGAAGAAGAAAGCAGGCCCATCTGACAGAATTAGAGACCCAGAAATACAATGAAGCAGCAGTTGATAATAGAGTATTGAAAGCAGATGTGGAGACATTGAGAGCAAAGGTGAAGATGGCTGAAGAAACTGTTAAAAGAGTTACTGGGTTAAACCCGCTATTCCAAGCTATGTCTGAGATATCCACAATGATGATGCCATCTTTCACTGGCAGTCCTTTTGACTCATCAGCAGACGCTGCTGTTCCTGAACAAGATGACCCCAGACATCACTACTATCAAGCACCAGAAAATAGTCATATGCCCAGCCATACT…	MASLSGYNPNILCQHIDRMLSNRESARRSRRRKQAHLTELETQKYNEAAVDNRVLKADVETLRAKVKMAEETVKRVTGLNPLFQAMSEISTMMMPSFTGSPFDSSADAAVPEQDDPRHHYYQAPENSHMPSHTPRMQNGMIDIPSMENAHQSSAAEAIGGNKIGRTSSMQRVASLEHLQKRMRGEASTCGTQRRKEQ*
345	Nicotiana benthamiana	NBEN_48	Niben101Scf01696g06033.1		C	Niben101Scf01696	613839-620585	ATGTATATAATCAAAACTCAATCCTGTCTCTTCTTTCTCCTTAATTTTCTTCCCATAATAAAAAAAAGTCTCAGCTGTTTTTTTCCGGAGAGAGAGAGATACAAAGAAAGAGAGAGAAATATGGATAGGGTGTTTTCAGTGGAGGATGACATTGGCGACCACTTCTGGTCGACGCCGCCGACGGCGGACTTAGGCGTTGATTCACCAACCGCTGCCACCGCCGCCTCCTACTCAAAGATGATGAATCGCAGCTCTTCCGAGTGGGCTTTTCAGCGCTTCCTCCAAGAAGCCACCGCCGCCGGTACCTCCACTTCATCTCACCCTCAGCCACCTACAATGACGGCGTCTTCCTCGTCATCTTCGCACCAAAACGACGTCGTGGAGATCAAGGATGAGAAT…	MYIIKTQSCLFFLLNFLPIIKKSLSCFFPERERYKERERNMDRVFSVEDDIGDHFWSTPPTADLGVDSPTAATAASYSKMMNRSSSEWAFQRFLQEATAAGTSTSSHPQPPTMTASSSSSSHQNDVVEIKDENLSTPNLNPSTALNSKPASSFGLTAPPNIAVDSEEYQAFLKSQLHLACAAVALTRGKSLNPQDSGSTAHDKGSETASAAQSGSHVSTLGSGQEVAKIQDKDAGGPVGIPSLPPVQKKPVVQVRSTTSGSSREQSDDDEAEGEAETTQGMDPADAKRVRRMLSNRESARRSRRRKQAHLTELETQVSQLRVENSSLLKRLTDISQKYNEAAVDNRVLKADVETLRAKVKMAEETVKRVTGLNPLFQAMSEISSMVMPSYSGSPSDTSA…
346	Nicotiana benthamiana	NBEN_49	Niben101Scf01774g04007.1		S	Niben101Scf01774	479782-480201	ATGATGTTTGAAGATCTGGTTCACTATCATCTCCCGGTTCTTGAAGATGTTCTTTCACCTAATGATATCCATGAAATTTTATCTTTTTTACAAACAGAACTTCCGGCTCCGTCTACGTCCGGTTCGGAAACAAACCGGTCGGTCTTTTCCCTTGAAGAAAGGAAGCGACGCAGAAAAGTATCAAACCGCGAATCCGCCCGGCGGTCCAGATTTCGAAAGAAAAAGCACTTAGATAACCTCACGGACCAAGTGGACCAGCTCAAAGTCGAAAACCGAGAATTAAAGAACCGATTGTACGTTGCTACGCACCAGTGTCAAGCAGCTCAAAGTGAAACGGACCGGCTTATACTTGAGTCTACTGTCCTTCAACAAAAATTAGCCGGTTTATGCCAAATCTTG…	MMFEDLVHYHLPVLEDVLSPNDIHEILSFLQTELPAPSTSGSETNRSVFSLEERKRRRKVSNRESARRSRFRKKKHLDNLTDQVDQLKVENRELKNRLYVATHQCQAAQSETDRLILESTVLQQKLAGLCQILHNMQRQ*
347	Nicotiana benthamiana	NBEN_50	Niben101Scf01774g10014.1		S	Niben101Scf01774	1081252-1081545	ATGGTGTGTTCTGGTCGTTTGGCGGACAGCAGCACTGGTGGAGATTGCTGCGTCACTGGTCCGTTGCTGGAGGTTGACGACGGGCTGGTGATGTTGCTGCTCGACGGAGGAAGACGCAGCAGCGTTTCAGGTGAGGGTCGTTTGGACAGGGCTCGGAGGTCACGAATGAGGAAGCAACAGCGATTGAGGGAGTTTATGAGCGAAACAACACAGCTACATAAACAGAACAGTATCTTCCGTGAGAGGATTGATTCTGTCGAGAGAAATCGTAAGAGCACAATTATACGTGATTAA	MVCSGRLADSSTGGDCCVTGPLLEVDDGLVMLLLDGGRRSSVSGEGRLDRARRSRMRKQQRLREFMSETTQLHKQNSIFRERIDSVERNRKSTIIRD*
348	Nicotiana benthamiana	NBEN_51	Niben101Scf01784g03001.1		A	Niben101Scf01784	297711-298871	ATGGGGAGTAATTTGAATATAAAGAACCGTGGAAATGAGCCACCGGGGGAGAGTGGAAGTGGTGGTGCTGGTGTTCCATTGGTGCGGCAGTCGTCTGTTTATTCACTGACTTTTGATGAGTTTCTGAGAGGGAGTGGAAAGGATTTTGGGTCAATGAACATGGATGAGTTGTTAAAGAACATATGGAGTGCAGAAGAGAGTCAGAACATGGGAACTTCTGGGGTTGGTGGACAAGAAGTGGGTGTTCCAGGTGGGAATTTACAGAGGCAAGGGTCTTTAACTTTACCGAGGACACTGAGTCAGAAGACTGTTGATGAAGTGTGGAAGGATATGTCAAAAGAGTATTGTGGTGGAAAGGATGGAAATGGTGATCTGGGGCTATCGAACATGCCTCGTAGG…	MGSNLNIKNRGNEPPGESGSGGAGVPLVRQSSVYSLTFDEFLRGSGKDFGSMNMDELLKNIWSAEESQNMGTSGVGGQEVGVPGGNLQRQGSLTLPRTLSQKTVDEVWKDMSKEYCGGKDGNGDLGLSNMPRRQQTLGEMTLEDFLVRAGVVREDAQLDAKASNVGVFGDMSHAGTSLGVGFGYQQSNGNTAMVASRNIDNNSGIGVRSGNLPLNVNGIISVQQQQGTMQLQQQPQQQQQQQQQPLFPKQLGLAYGAPMAIPTSGQLGSPGIRGGIVGISDPALGSSLVQSAALTGGGMNMVGFGAGGVTSATGSPAVSSDGLGKSNGDTSSISPVPYVFSGGLRGRKGGAVEKVVERRQRRMIKNRESAARSRARKQVISLESYR*
349	Nicotiana benthamiana	NBEN_52	Niben101Scf01812g04009.1		A	Niben101Scf01812	445210-451652	ATGGTAACTCATGGGATGGGATCTCAGGGGGGAGTTGGTGGTGGAAAAGAAGCAAAGCCGAATGCTTTGGCTAGGCAAGGATCACTCTACAGCCTCACTCTTGATGAGGTTCAGAATCAATTGGGAAATTTCGGGAAACCACTAAACAGCATGAATCTTGATGAGCTTGTTAAAACTGTATGGACTATTGAGGCTTGTCAAGAATTGGGGGGAAATGATTATGGGGGAGCTCAGCACGGGACTAATTCCCTGCATCGACAATCATCGGGCATTACAATGTCCAGAGATCTCAGCAAGAAGACTGTTGATGAGGTGTGGCAGGATATTCAACAGGGGCAAAAAAGGGATAGTAGTATTGGTAAGAGAAGTCAGGAGAGACAACTTACTTTTGGCGAGATA…	MVTHGMGSQGGVGGGKEAKPNALARQGSLYSLTLDEVQNQLGNFGKPLNSMNLDELVKTVWTIEACQELGGNDYGGAQHGTNSLHRQSSGITMSRDLSKKTVDEVWQDIQQGQKRDSSIGKRSQERQLTFGEITLEDFLVKAGVIAESTQGRRISGLVLGVDSMSLAQQAQWPHYQIPTMHQAPEQQLQQQQNIVPVFMPGHPVQQPLPVVANPIVDPETQMTMSPSHLMGTLSDTQTSGRKRIAPEDVIEKSVERRQKRMIKNRESAARSRARKQAYTHELENKVSRLEEENERLKRQKLEGLXVVANPIVDPETQMTMSPSHLMGTLSDTQTSGRKRIAPEDVIEKSVERRQKRMIKNRESAARSRARKQAYTHELENKVSRLEEENERLKRQKEME…
350	Nicotiana benthamiana	NBEN_53	Niben101Scf01852g04031.1		I	Niben101Scf01852	539435-543385	ATGGGGGGTGAAAGTGATGAAGCTAATACTGAGATGATGCGGAGACTTCAATGGTCATTTGGGACATCATCTTCTTCCCTACAGAAACCCCAATATATTTCGACGAACCAACTTGAGATACCCCAGTTGTCTACTTCCCAGTTTCATGGTCAAATGCGGCAGTTTTCTCCTAATTTTGGTGTTGAAAATAGTTCCAAACGGGTTGGCTTATCGCCTTCTCATCCGCAAATGCCCCCTATTTCGCCATATTCTCATATCCCAGTTAGTAGGCCGATAAGTCAGCAACACGGTATGCAGAATTTTACTACTCAAGGGCCCTCACATTCGCGTTCTTTATCACAACCGTCATTTTTCTCACTTGATTCATTGCCACCCCTGAGCCCTTCGCCATATAAGGAA…	MGGESDEANTEMMRRLQWSFGTSSSSLQKPQYISTNQLEIPQLSTSQFHGQMRQFSPNFGVENSSKRVGLSPSHPQMPPISPYSHIPVSRPISQQHGMQNFTTQGPSHSRSLSQPSFFSLDSLPPLSPSPYKESLSTFISDPVAADVSMEDRDGNSHSSLPPSPFSRCNSSRVGESLPPRKAHRRSNSDIPFGFSSIMQSSPPLVPSRSPAQLVKRESYSDKSNKNAEGMGERKSEGEVVDDLFSAYMNLDNIGLLNSSGIDEKQGNENREDLDSRASGTKTNGCDSSDNEATSSVNDSGSSMHTLGVSSSTEKREGIKRSAEGDIAPTVRHYRSISMDSFMGKLNFGDESPKLPPSPGPLHGQLSPTNSLDANSESFSLEFGNGEFNGAELKKIMANE…
351	Nicotiana benthamiana	NBEN_54	NBEN_bZIP.Niben101Scf01970.1		E	Niben101Scf01970	712886-716232	ATGGCGAACACCAAGGGGCCATCTAGTATGAGAAGTATGATGTACAATGGAAAGTGCTCTTTACTGCCTCCTAAAAGTCCATTTCCTAGCATGGCCCCATCTTATCTCGATTATGTTCCCAATTCTGCTGTCAACCAAAAGGGCATCCTGAAACCCAGAGATGGAAATTCACACCATCAGCGTACTTCCTCTGAAAGCTGTCTGATAGAGGAGCAACCCTCTTGGTTGGACGATCTTCTTAATGAGCCAGAAACTCCTGTACGCAGAGGCAGCCATCGACGCTCCTCAAGTGACTCCTTTGCATATTTTGATGCTGCTAACATTGCAGGCTTAGATTACATAGCTCAAGTCGATAACAAGTTCGGAAATATGACTTGTATCCCTTCCTGGGGGTCACAA…	MANTKGPSSMRSMMYNGKCSLLPPKSPFPSMAPSYLDYVPNSAVNQKGILKPRDGNSHHQRTSSESCLIEEQPSWLDDLLNEPETPVRRGSHRRSSSDSFAYFDAANIAGLDYIAQVDNKFGNMTCIPSWGSQDFDYYKDARHAVSYVDQNSSVQRENRTKGASSNTVLHLRNLSSPREDLRVQSSGSSCFPQDGDRPKSAGSDKQDLAKSGKGSAEKKDSSQSKSSSSETDTKRAKQQFAQRSRVRKLQYIAELERNVQVLQAESSEVSAELEFLNQQNLILSMENKALKQRLESLAQEQLIKYLEHEVLERERGRLRALYQQQQQPQQLSSSHRRNTSRDLDQQFANLSLRQKEADRDPFSGQLQI*
352	Nicotiana benthamiana	NBEN_55	Niben101Scf01990g00010.1		G	Niben101Scf01990	120262-124311	ATGGGAAATAGTGAGGAAGGAAAATCTTGTAAGCCTGAGAAATCATCTTCAACCGCACCAGCATATTATGGTCCTCGAGTAGCTGTACCTCCATATGCTAATTCTCCTGTTGCACCTGGTTATGCTCCTCATCCTTGTATGTGGGGACCGCTACAGCCTATGATGCCACCTTATGTTGCACCATATGCAGGAATCTATGCACATGGTGGTGTTTATGCGCATCCTGGAGTTCCTATCGTGTCTCGTCCTCAGGCTCATGGAATGACATCATCTCCTGCTGTCAGCCAAACTGTGGATGCTGCTTCTTTGAGCGTGGACATTTCTGCTAAGTCTTCGGAGAATACTGTTCAACGCTTGATGAGTAAGTCAAAAGGATCTAATGGGCTTGGTATGTCAATA…	MGNSEEGKSCKPEKSSSTAPAYYGPRVAVPPYANSPVAPGYAPHPCMWGPLQPMMPPYVAPYAGIYAHGGVYAHPGVPIVSRPQAHGMTSSPAVSQTVDAASLSVDISAKSSENTVQRLMSKSKGSNGLGMSIQNCSVDNGVGTDHGPSQSGQTEGSSDGSNIHTAEVGENSKKRSHETIPNNSGEGKSQTRSSPQPREVNGATKKETSIAVSPGNIAEKVAGTVFSPTMTTPLELRNPVGTLAKASPTNVSRISPAVPGEVWLQNEREIKREKRKQSNRESARRSRLRKQAEAEDLAIRVQSLTSENVGLKSEINKFTENSVKLKLENAALIERLKNKRRGQAEEVTLGKIDDKRLQPVSTADLLARVNNSGPLDRTNDDSEIRENNTSGTKLHQLLD…
353	Nicotiana benthamiana	NBEN_56	Niben101Scf02025g04001.1		F	Niben101Scf02025	394422-400572	ATGGATGACGGTGAGCTGGAATTTTCTAATCAAGAAATGTTGTCAAGTTCAAATTTTGGTGAATTTCCAGACAGTGGTTCAATGGACAGTTTCTTCAATGAAATTCTCAAGGATACACATGCTTGCACTCATACGCACACCTGCAATCCACCTGGTCCTGATAACACCCACACCCATACATGTTATCATGTTCATACCAAAATTGTCCCTCCCCTGATTGAGAATAAGACAGCCAGTGATGATACTGCTGAATCCGCAGAGGATAAAAGAAAGAAACGTCCTTTGGGTAATAGAGAAGCGGTTCGTAAGTACCGTGAGAAGAAGAAGGCTCGAGCTGCCTCATTAGAAGATGAAGTTGTCAGATTAAGGGCTATAAATCAGCAACTCATGAAAAGGCTG…	MDDGELEFSNQEMLSSSNFGEFPDSGSMDSFFNEILKDTHACTHTHTCNPPGPDNTHTHTCYHVHTKIVPPLIENKTASDDTAESAEDKRKKRPLGNREAVRKYREKKKARAASLEDEVVRLRAINQQLMKRLQGQAVLEAEIARLKCLLVDIRGRIEGEIGSFPYQKPMKSGDVYQNLVNPNLPGAYVMNLCNLQCDDRVYCLHPGSEGKNLDNTALDGQGFDNCEFETLQCLGNQISELKEGSGCALGNGVPAGNPSGGSKRKGTRAAIAS*
354	Nicotiana benthamiana	NBEN_57	NBEN_bZIP.Niben101Scf02155.1		S	Niben101Scf02155	347870-348145	ATGATTTCAAATACGGAATCCGTAAGGCGATCTAGGATGAAGAAACGAAATCTTGTGCAAGAATTGACAAAGGAAGTCAGGAAATTACAAGCTGCCAACAGAACCATTGTGGTTAAAATTGAAGAGATTACAGAGAGGTTGACATTTTGCACTGCTCAGAATAATGTGTTGAGGGCACATGAAATAGAGTTAAGAGATAGGTTAAAGTCTCTGAACGATTTGATTAATCATAGTGGTTGGGGAGAGAGAAAAGCGGGAGGGATAGGATATACGATA	MISNTESVRRSRMKKRNLVQELTKEVRKLQAANRTIVVKIEEITERLTFCTAQNNVLRAHEIELRDRLKSLNDLINHSGWGERKAGGIGYTI
355	Nicotiana benthamiana	NBEN_58	NBEN_bZIP.Niben101Scf02191.1		I	Niben101Scf02191	5021-18264	ATGGACCCGAAGTTCACCGGAAAGCCTATACCCATCCCATTTCGAGCGGGTCGGACCGACCTTGACCAGATGCCGGATACTCCGACCCGTATAGCACGTCATCGACGGGCTCAATCGGAGACTTTCTTCCGGTTCCCGGACTTCGACGATGATATCCTCTTAGACGACGTCGTAGCCGACTTTAATCTGGACATTTCAGCGCCGTCGCTCTCCCCCTCTGGTGATACTCATATGCAACCGGCCAATTCTGCTGACTCGTCGTCGACCGGTGGACCGGCCTTAATGTCCGGACCGGGCGCTAATAATAACCCTAGACCGTTGAATCATTTTCGGAGTTTATCAGTTGACGCCGACTTTTTTGATGGTTTGGAGTTTGGAGCGACTACGCCGGGAGCGGCG…	MDPKFTGKPIPIPFRAGRTDLDQMPDTPTRIARHRRAQSETFFRFPDFDDDILLDDVVADFNLDISAPSLSPSGDTHMQPANSADSSSTGGPALMSGPGANNNPRPLNHFRSLSVDADFFDGLEFGATTPGAAEEEEKKVFGSGSGSVSGSGTRHRHSNSMDGSFSTASFEAECSSSVKKAMAPDRLAELALIDPKRAKRILANRQSAARSKERKIRYTSELERKVQTLQTEATTLSAQITVLQRDNSGLTTENKELKLRLQALEQQAHLRDALNEALREELQRLKIAAGQIPGANGNRGPCPHFPPQPQSFVQCGSHHAQQHMPHSTTSTQNIGGQTQPSFMNFNNRG*
356	Nicotiana benthamiana	NBEN_59	Niben101Scf02275g01001.1		D	Niben101Scf02275	86285-95459	ATGGCTAGTAAGATTGGTACAGCAGGCAATAGAAGTGGTACTACTGGAATGCCAAGTTTCATTTCTCAGATATCTGTTTCTAATCCCATGGGCACAGAAGCGAACAATACAAATACTTCTAGAATGTCTGATTTTGGGGTGCTCGAGCAATATCTTGGATTCCGTATTGGAGATGGCGCTAATGTTAATCGAAGTCCGCTATTTAATTCAACATCTGCAACTAATCCAGCAGTGGGTTTTGAAGTCTCTGGAACCATCAATAGGACTTTAGCTCCTTCAAATACAAGTTTGCCTACTGCTACTCCGAGATCTCAGACAATGTTGTTGCAATCAAACCTGGTTTCAGCATCAGGCAATCATCATGAGAATTGGGGAGAGTCAAACATGGCAGATTCTGGT…	MASKIGTAGNRSGTTGMPSFISQISVSNPMGTEANNTNTSRMSDFGVLEQYLGFRIGDGANVNRSPLFNSTSATNPAVGFEVSGTINRTLAPSNTSLPTATPRSQTMLLQSNLVSASGNHHENWGESNMADSGSRTDTSTDMDGDDKNQRIEAGQSSDKSKEKVLDQKTLRRLAQNREAARKSRLRKKAYVQQLENSRLKLSQLEQDLQRARQQGKYISNIADQPNGVGANGPLAFDAEYSRWLEEHNKHINELRTAVNAHASDPELRSIVNNVTTHFDEVFRVKGNAAKADVFHVLSGMWKTPAERCFMWIGGFRPSELLKLLVNQLEPLTEQQLAGIFNLQQSSHQAEDALSQGMEALQQSLAETLANGSPAPEGSSGDVANYMGQMAMAMGKLGTL…
357	Nicotiana benthamiana	NBEN_60	NBEN_bZIP.Niben101Scf02360.1		E	Niben101Scf02360	149247-153317	ATGGCAAATTCCAAGGGGCCATCTAGCATGAGACATATGATGTACAATGGAAAGAGCTCTTTACTGCCTCCTAAAAGTCCGTTTCCTAGCACATGTCCCTCGTATGTTGATTATCCCCCTAGTTCTGCGGTCACCCAAAAGGGCATTTCGAAATGCAGAGATGGTTCACACCATCAGCGTACTTCTTCTGAAAGCTGTCTTATAGAGGAGCAACCATCTTGGTTAGATGATCTTCTTAATGAACCGGAAACTCCTGTACGCAGAGGTGGCCACCGGCGTTCATCTAGTGACTCCTTTACATATTTTGATGCTGCTAATATTGCAAACTTAGATTACATAGCGCAAGATGATAATAAATTCCGAAATATAACTCCTGTCGCTTCTTGGGGATCCCAAGAC…	MANSKGPSSMRHMMYNGKSSLLPPKSPFPSTCPSYVDYPPSSAVTQKGISKCRDGSHHQRTSSESCLIEEQPSWLDDLLNEPETPVRRGGHRRSSSDSFTYFDAANIANLDYIAQDDNKFRNITPVASWGSQDFDYYKDARHATYHVDQNSSNQQKSRSRDASPNAKPHLRGFPPSRENVKTQSLRSSFLPQEGERPKSAGSDKQDLLESVATDPKGSGEKKDSSHSKSSASENDTKRAKQQFAQRSRVRKLQYISELERNVQVLQACSEVSAELEFLNQQSLILSMENKALKQRLENLAQEQMIKYLEHEVLERERGRLRALYQQQQLPQSQQQQQSSSSHRRSTSRDLDQQFANISLKHKDSS
358	Nicotiana benthamiana	NBEN_61	Niben101Scf02390g02005.1		X	Niben101Scf02390	309379-310260	ATGGCTGATGAGAATGTTGCCAACGGGGAGGTTTTTGATGATGCAGTGGAGATGGAAGGAGAGGAGGATTCTGAGGGTGCATTGAAAACCTCTCCTTTGACGCAGAAAATAGCTGCCTTAGAGCAAGAGAACAATCAACTTTTTCACGAGAACCAAGTCGTCAAAGAAAGGATTGAGAAATTGAAGCACTCGATTGAGGAAATGGAGAACGAGAAGGTCGAGTTACAGAAGAAGGCAGAGAAGTTTGAGTCAGAGAATAAGGCTTTAGGATCAGTAGCTGCCCGAGCAGCAGAGCTCGAGGGCGAACACTCGCGACTGCAGCACGATCTCATAACTGCGATGAACGATCTAGAAGAATCGAATTCGGAGTTATCAAAACTGAAGTTGGCTCTGGGGGGG…	MADENVANGEVFDDAVEMEGEEDSEGALKTSPLTQKIAALEQENNQLFHENQVVKERIEKLKHSIEEMENEKVELQKKAEKFESENKALGSVAARAAELEGEHSRLQHDLITAMNDLEESNSELSKLKLALGGLKSSADEKSGKLSATESERNLLLLKIEKLEASGNDQRAEVEMKEKEIRGLKKKIEDLEAAVMSNEAWKKEKEVLHMVKDELEKRITEMMGKVAELEKKLEEKETLINERDVDSNVNGIPGAENKVGSSDVKVDLTVVAVSSVAAVAIVGILCYLRYARKP*
359	Nicotiana benthamiana	NBEN_62	NBEN_bZIP.Niben101Scf02413.1		S	Niben101Scf02413	143845-150094	ATGGTGTGTTCTGGTCGTTTGGCGGACAGCAGCACTGGTGGAGATTGCTGCGTCACTGGTCCGTTGCTGGAGGTTGACGACGGGCTGGTGATGTTGCTGCTCGACGGAGGAAGACGCAGCAGCGTTTCAGGTGAGGGTCGTTTGGACAGGGCTCGGAGGTCACGAATGAGGAAGCAACAGCGATTGAGGGAGTTTATGAGCGAAACAACACAGCTACATAAACAGAACAGTATCTTCCGTGAGAGGATTGATTCTGTCGAGAGAAATCGTAAGAGCACAATTATACTTCACAACTCTGAGAGCCGAAGACGAAGCGAGGAAGACAGACACAGAACAGCAGTGAAAAGGAACTTAATATGGATATTGCAGCTGTGTACACTGTATTTGCAGCACAATCAG…	MVCSGRLADSSTGGDCCVTGPLLEVDDGLVMLLLDGGRRSSVSGEGRLDRARRSRMRKQQRLREFMSETTQLHKQNSIFRERIDSVERNRKSTIILHNSESRRRSEEDRHRTAVKRNLIWILQLCTLYLQHNQQQLKHQQ*
360	Nicotiana benthamiana	NBEN_63	Niben101Scf02468g11017.1		E	Niben101Scf02468	1103698-1108762	ATGTCAAGACAAGCTCATCTTCCGCCTCGCTGCCCGTTTCAGAAGAAACCAATAATTAGTCCAGTTCAAGACCCTTTTAACCCAACATCACAGCAACATAACCCGTTACCTCCTCGACACCATAAGTCTATTTCACAAAGCTATATCTTAGAGGAGCAACCCGCATGGCTTGATGAGCTGCTGAATGAATCGAACTCAAATTCCGATGACATAATGCATAGGAGATCAGCTAGTGATTCTTTTACGCTTTTGGATGGTCTTGTTTCGTTGGAAGGTTTCGATAAGTTTGACGAAACTGAATCCAATGCATCTTGTGAATCAGATAGTAGTTTGAAGACTAATTGCGTCTATGGTCCTAATTCGCCCCGTGGAAAGAGCAATGTAACCTTTGCTGAGAAT…	MSRQAHLPPRCPFQKKPIISPVQDPFNPTSQQHNPLPPRHHKSISQSYILEEQPAWLDELLNESNSNSDDIMHRRSASDSFTLLDGLVSLEGFDKFDETESNASCESDSSLKTNCVYGPNSPRGKSNVTFAENAIVSALSEYVSPNPLQYLDRCISESGAAQAELAVAGNVSGAADDVNAEAKAMKRHPGQRSRVRKLQYIAELERTVNTYEALESELAAKVASLLQQRVALSMENRELKQQMLRLQQEKVIVDAQYRSLRKELERLRYLAHSLNFKKHSYAAEIGSEAAWQMLDFGKLDLN*
361	Nicotiana benthamiana	NBEN_64	Niben101Scf02510g02007.1		D	Niben101Scf02510	238247-248925	ATGGAGAGTCAAAGAATAGGAGACAGTGTTAGTTTGTCAGCTGAATCAGGACCTTCACACCACCATCACAATATGTCTTATGCACTTTTTCGTGGCCTAAATCCTCCTAATACAAGTTTCATGTGTCATTCCACTCCAAATAATCAAGAACAGCCAGCTTTTGATTTTGGGGCGTTAGAAGAAGCTATTGTGTTACAAGGAGTTAAGATGAGCGATGATGAAGCAGCTAAAGCATCTTTATATGCAGCTACAAACAGACCTGCTGCAACACTGGAGATGTTCCCTTCTTGGCCTACGAGATTCCATCACACTCACACCCCAAGGGGAAGCTCAAAATCAGGAGGAGAAGAGAGCAGTGAATCAGGTTCAGCACTAAACACTTATTCAAGCAGAGGTGAA…	MESQRIGDSVSLSAESGPSHHHHNMSYALFRGLNPPNTSFMCHSTPNNQEQPAFDFGALEEAIVLQGVKMSDDEAAKASLYAATNRPAATLEMFPSWPTRFHHTHTPRGSSKSGGEESSESGSALNTYSSRGEPHLEPESPISGKPSSGYQSLEQNQQQQLQPPQQQLQEMASDSPRTGVSHTEPASKSNYEKRKGVGSTSDRVVDAKTLRRLAQNREAARKSRLRKKAYVQQLETSRIRLAQLEQELQRARSQGLFMGGGAAAGANISSGAAMFDMEYSRWLDDDQRHISELRTALQAHLGDGDLRIIVDGYIAHYDEIFQLKGVAAKSDIFHLITGMWTTPAERCFLWMGGFRPSELIKMLIAQLDPLTQQQVVGIYSLQQSSQQAEEALSQGLEQL…
362	Nicotiana benthamiana	NBEN_65	Niben101Scf02621g04024.1		F	Niben101Scf02621	453685-457771	ATGATGGCTGACGGAGAGCTGGAATTTTCTAACCAAGAAATGTTATCTAGTTCGAATTTTGGTGAATTTAGTAGTTCCATGGACAGCTTTTTCAATGAGATTCTCAAGGATACGCATGCCTGCACTCATGCCCACACTTGCAACCCGCCTGGCCCTGATAATTCTCATACACACACTTGTTACCATGTTCACACCAAATTCGTGCCTCCCTCAGAGGAGGATGAGGATAAGAACCCCAGTGATGATACTGCAGAGTCTTCAGAGAAGAAAGGAAAGAAACGACCCGTGGGTAATAAGGAAGCCGTTCGCAAGTATCGTGAGAAAAAGAAAGCTCGGGCTGCTTCGTTGGAGGATGAAGTTATCAGATTGAGGGCTATAAATCAGCAACTATTCAAGAGG…	MMADGELEFSNQEMLSSSNFGEFSSSMDSFFNEILKDTHACTHAHTCNPPGPDNSHTHTCYHVHTKFVPPSEEDEDKNPSDDTAESSEKKGKKRPVGNKEAVRKYREKKKARAASLEDEVIRLRAINQQLFKRLQGQAVLEAEVARLKCLLVDIRGRIEGEIGSFPYQKPMKSGNVYQNVVNPNIPGSYVVNSCNLQCDDQVYCLHPGAEVKSSDGTVLNGQGFNNCEFETLQCLGNQTSGMEEVSCPMDNGTPTPTANTSGRSKRTGGARTTTTG*
363	Nicotiana benthamiana	NBEN_66	Niben101Scf02694g03002.1		I	Niben101Scf02694	308415-317211	ATGGATAAAGAGATGTGTGTAGGGGGTTTATTGCCTCCTTCAGGAAACTTTTCGCTCTTTTCGCCTTCTGGGAGTAGTTATAGTGTAAAGTCAGAGCCATCTGGATCATCAAATTTACCTCCTTTAGGGCCTGTACCTGCTTCAGAACCAAAAGCAAACCAATTTAGTCATGATATTAGTCGAATGCCAGATAACCCACCTAAGAATTTGGGTCATCGACGTGCCCATTCGGAGATTCTTACACTTCCTGATGATATAAGTTTCGATAGTGATCTTGGTGTTGTTGGTGGACTGGATGGACCGTCTTTGTCTGATGAGACCGAGGAGGATTTCCTCTCTATGTATCTTGATATGGATAAGTTTAATTCTTCATCTGCTACTTCTTCATTCCAAGTGGGT…	MDKEMCVGGLLPPSGNFSLFSPSGSSYSVKSEPSGSSNLPPLGPVPASEPKANQFSHDISRMPDNPPKNLGHRRAHSEILTLPDDISFDSDLGVVGGLDGPSLSDETEEDFLSMYLDMDKFNSSSATSSFQVGESSSGSLQAPAMGFTASRTDNVTAAVSEKPRVRHQHSQSMDGSTIIKPEMLMSGGEDPSSAETKKAMSAAKLAELALIDPKRAKRIWANRQSAARSKERKMRYIAELERRVQALQTEATSLSAQLTLLQRDTNGLCAENSELKLRLQTMEQQVHLQDALNDALKEEIQHLKVLTGQGITNAGPMMNFPASNNGGNQQFYSNNHAIHASLMAQQLQQLQIHSHKQQHRFQHHQLHQQEQQLQQAGDMKLRSSSSSAQNDHASDNRMD*
364	Nicotiana benthamiana	NBEN_67	Niben101Scf02738g05002.1		S	Niben101Scf02738	510381-510923	ATGCAACCCACTGATGTCACAGACTTCTATTGTTTACTTCCTTCAAACTCAACTCAATACCCATCCCAATCCAGCACTAACTACAACGCATCCACATTTCAACTTAACAGGCTCTTGAACCCTTTGTATCATCTTCAGATCACCCCTCAAGTTCAAGAGTTCAATCCACAACTAACATGCTTCAACAGTAACTCTACATCCGACGAAGCTGATGAACAACAGTTGAATCTAATAAATGAACGGAAACAGAGAAGAATGATATCTAATAGAGAGTCCGCACGGAGATCACGCATGCGCAAGCAGAGGCACCTAGACGAGCTTTGGGCACAGGTTGTCTGGCTCCGAAATGAGAATCACCAGCTCCTGGACAAACTAAATCATGCTTCTGAGCGCCAGGAT…	MQPTDVTDFYCLLPSNSTQYPSQSSTNYNASTFQLNRLLNPLYHLQITPQVQEFNPQLTCFNSNSTSDEADEQQLNLINERKQRRMISNRESARRSRMRKQRHLDELWAQVVWLRNENHQLLDKLNHASERQDQVLEENAQLKKEASELRQMITDMQLSSPCPSLRALEDEPCSGLSQNE*
365	Nicotiana benthamiana	NBEN_68	Niben101Scf02835g00012.1		A	Niben101Scf02835	8039-16083	ATGGCGTCAATGAAGCTGATGAGTTCATCGGCATCGCGAAATTCCGATCGAAGGAAATCGTCAGCGTCGTCGTCGTCTTCGTCGTCAACGATGCCGCACGATTTGCAATTTTCAAACAACGGGAGTAATAATAGTAGTTGTAATTTGGAAGCGACTTCTGTGACGCCTGATGTAATTTTCCGGAATGTGTACGGAGAGAGTCATAATAATGCTTTACTGAACACGGAGATTACGTTACTCGATGCTGCCGGAGCAATAACGCCGATTAGTGATTCCGAGACACCGACGGCCACGGCGGTGACGGCTAGTGAGTTGACACCGGCTAGGAGGACGGTGGATGATGTGTGGAGGGAAATTGTGGAAGGGAAGAGGGAAAAGCAAAGGGCGGCAGTAGTTGCG…	MASMKLMSSSASRNSDRRKSSASSSSSSSTMPHDLQFSNNGSNNSSCNLEATSVTPDVIFRNVYGESHNNALLNTEITLLDAAGAITPISDSETPTATAVTASELTPARRTVDDVWREIVEGKREKQRAAVVAGCKEEMMTLEDFLVKAGAVEEEAVAPVLGPEVKVELGTERLSGGIFAFDNSAPYMATPQQSAPGFGRGRRKAVLEPLDKAVMQRQRRMIKNRESAARSRERKQAYQVELESMAVKLEEENELLLKEKEERTKAHYKQLIEKVIPVVDKQKPRRVLRRVCSMQW*
366	Nicotiana benthamiana	NBEN_69	NBEN_bZIP.Niben101Scf02864.1		S	Niben101Scf02864	220498-221013	ATGGCTTCTTGTAGTGGAGGAACATCTTCAAGGTCAGTAATCCAATTGAGGAACTATGGTTCAAAAAATGATGATCATCTCCAACAAGTAATAAATCAAAGGAAACGCAAAAGGTTGATATCCAACAGGGAATCAGCTAGAAGATCAAGAATGAGGAAACAGAAGTATTTGGATGACCTAATGGCTGAAATGAGTCAACTCAAGGAGGAAAACAACCAAATTGTGACAAACATAAACATGGTGGATCAGCTTTACTTGAATGTGGAAGCAGAGAATTCTGTTCTCAAAGCTCAAATGGCTGAGTTAAGCCACATGCTGCAGTCTCTAAAGGAGATCATTGACTACAAAACTTCAGTAAATGCTGCAACGACAACTAAAGAAACTGAGGATTTATGGAAT…	MASCSGGTSSRSVIQLRNYGSKNDDHLQQVINQRKRKRLISNRESARRSRMRKQKYLDDLMAEMSQLKEENNQIVTNINMVDQLYLNVEAENSVLKAQMAELSHMLQSLKEIIDYKTSVNAATTTKETEDLWNYYGENMNNVDINGGYDLNLLHVNQLIMASNDEQIIWSL*
367	Nicotiana benthamiana	NBEN_70	Niben101Scf02915g06006.1		S	Niben101Scf02915	681326-681619	ATGGTGTGTTCTGGTCGTTTGGCGGACAGCAGCACTGGTGGAGATTGCTGCGTCACTGGTCCGTTGCTGGAGGTTGACGACGGGCTGGTGATGTTGCTGCTCGACGGAGGAAGACGCAGCAGCGTTTCAGGTGAGGGTCGTTTGGACAGGGCTCGGAGGTCACGAATGAGGAAGCAACAGCGATTGAGGGAGTTTATGAGCGAAACAACACAGCTACATAAACAGAACAGTATCTTCCGTGAGAGGATTGATTCTGTCGAGAGAAATCGTAAGAGCACAATTATACGTGATTAA	MVCSGRLADSSTGGDCCVTGPLLEVDDGLVMLLLDGGRRSSVSGEGRLDRARRSRMRKQQRLREFMSETTQLHKQNSIFRERIDSVERNRKSTIIRD*
368	Nicotiana benthamiana	NBEN_71	Niben101Scf02917g00002.1		A	Niben101Scf02917	54746-56936	ATGGGCGTACCAGAGTCGGAGATGGTGTCACAAGGTGAGGTTGAATCACCAATGCAACCAGATCAAAACCAGCACAAGAACCATCAGTTCCCGTCCCTCGGTAGACAAGCATCGATCTACTCCCTCACTCTCGATGAATTCCAACACACCCTATGTGAAAGTGGCAAGAATTTCGGGTCGATGAATATGGATGAATTCCTTAACAGCATTTGGACTGCTGAAGAAAATCAAGCCCACGCACACGCCCATGCCCATGCCGCGCATAGGCACGCGCATTCTCATGCTCATAGCCAGGCACCAAGTACAGGGGAAGCCACTAGCACACCACATTTTGCGATAGGACAGAGCAATGTTCCAATGGAGAAAGCTATTGCCAAGCAGCCAAGCTTGCCAAGGCAG…	MGVPESEMVSQGEVESPMQPDQNQHKNHQFPSLGRQASIYSLTLDEFQHTLCESGKNFGSMNMDEFLNSIWTAEENQAHAHAHAHAAHRHAHSHAHSQAPSTGEATSTPHFAIGQSNVPMEKAIAKQPSLPRQGSLTLPEPLCRKTVDEVWSEIHKSQKEQHQNNGSSVQDTGNSAQRQVTFGEMTLEDFLVKAGVVREQENAAAPAPPQQQSYMIYQNRNNPAMANMTRPVIGLGGVTGSVGVGIPGYLPLPQTGVVEAPVYPVSMKRGGVFPQQPTAVYGGRMGNGGGVGYGQVQGVAGMGSPLSPVSSDGVCVNQVDSGGQYGLEMGMTGGRKRIIDGPVEKVVERRQRRMIKNRESAARSRARKQAYTVELEAELNQLKEENAHLKQALAELERK…
369	Nicotiana benthamiana	NBEN_72	Niben101Scf03038g13022.1		F	Niben101Scf03038	1360816-1373727	ATGTCGCAGAGGACAGTTCCGGCGCCGTTTCTGACGAAGACGTACCAATTGGTAGATGATGCGACCACCGACGACGTCGTATCTTGGAACGAGAGTGGCACTACTTTTGTGGTTTGGAAAACTGCTGAATTTGCAAAGGATTTACTGCCCACTTACTTCAAGCACAACAATTTCTCCAGCTTCGTTCGTCAGCTTAACACCTATGGCTTTCGAAAGATTGTGCCAGACAAATGGGAATTTGCCAACGAGAACTTCAAAAGAGGACAGAAGGAGCTCCTCACAGCAATACGCCGTCGTAAAACCGTGACACCGACCCCAGCCGGTGGAAAGTCCGTGGCACCAGGCACATCAGCATCTCTGGACAATTCGGGGGAAGACTTAGGTTCAAGTTCAACCTCA…	MSQRTVPAPFLTKTYQLVDDATTDDVVSWNESGTTFVVWKTAEFAKDLLPTYFKHNNFSSFVRQLNTYGFRKIVPDKWEFANENFKRGQKELLTAIRRRKTVTPTPAGGKSVAPGTSASLDNSGEDLGSSSTSSPDSKNPGSVYTPGKSQFADLSDENEKLKKENQMLSSELTQAKKQCDELVAFLNQYVKVAPDMISRIMSQGTSGSSHGELVKEVIGGVKDLEAQGSDDDQDDDEKGDTLKLFGVLLKENKRKRGPDDNADISGSRGKMMKTVDYNLPWMKMSSASGESNKVCN*
370	Nicotiana benthamiana	NBEN_73	NBEN_bZIP.Niben101Scf03072.1		G	Niben101Scf03072	305616-310705	ATGGGAGCTGGGGAAGAGAGCACCCCTACAAAGCCTTCAAAACCGGCTTCAACTCAGGAGACACAAACTACACCCTCATATCCTGATTGGTCAAGCTCTATGCAGGCTTATTATAGCGCTGGAGCTACTCCTCCCTTCTTTGCCTCACCTGTTGCTTCTCCTGCTTCCCACCCATACTTGTGGGGAGGCCAGCATCCTCTTATGCCTCCTTATGGGGCTCCAGTCCCGTATCCAACTTTATATCCTCCTGCTGGGGTTTATGCGCATCCTAACATGGCCACGCACGCTCCAAACGCTGTGCAGGCAAATCTTGAATCAAACAGGAAGGATCTTGAAGGAAAGGATCGGAGTATGAACACAAAGTTAAAGGCCAGTTCTGGTGGCAAGGCAGGCGACAGC…	MGAGEESTPTKPSKPASTQETQTTPSYPDWSSSMQAYYSAGATPPFFASPVASPASHPYLWGGQHPLMPPYGAPVPYPTLYPPAGVYAHPNMATHAPNAVQANLESNRKDLEGKDRSMNTKLKASSGGKAGDSWKVASGSGNDGATQSDETRSEGTSDTNDENDNQEFAASKKGSFDQMLADGASAQNNPTTSNYQISMHANPVTVPATNLNIGMDAWNASSAGPGAIIIAARRVEALSGENHSLKDELQRLSEECEKLTSENSSIKEELMRLCGPDAVSKLESNGNARHLQSNVEEAS*
371	Nicotiana benthamiana	NBEN_74	Niben101Scf03224g05020.1		S	Niben101Scf03224	581243-581536	ATGGTGTGTTCTGGTCGTTTGGCGGACAGCAGCACTGGTGGAGATTGCTGCGTCACTGGTCCGTTGCTGGAGGTTGACGACGGGCTGGTGATGTTGCTGCTCGACGGAGGAAGACGCAGCAGCGTTTCAGGTGAGGGTCGTTTGGACAGGGCTCGGAGGTCACGAATGAGGAAGCAACAGCGATTGAGGGAGTTTATGAGCGAAACAACACAGCTACATAAACAGAACAGTATCTTCCGTGAGAGGATTGATTCTGTCGAGAGAAATCGTAAGAGCACAATTATACGTGATTAA	MVCSGRLADSSTGGDCCVTGPLLEVDDGLVMLLLDGGRRSSVSGEGRLDRARRSRMRKQQRLREFMSETTQLHKQNSIFRERIDSVERNRKSTIIRD*
372	Nicotiana benthamiana	NBEN_75	NBEN_bZIP.Niben101Scf03282.1		S	Niben101Scf03282	466486-469569	ATGGTGTGTTCTGGTCGTTTGGCGGACAGCAGCACTGGTGGAGATTGCTGCGTCACTGGTCCGTTGCTGGAGGTTGACGACGGGCTGGTGATGTTGCTGCTCGACGGAGGAAGACGCAGCAGCGTTTCAGGTGAGGGTCGTTTGGACAGGGCTCGGAGGTCACGAATGAGGAAGCAACAGCGATTGAGGGAGTTTATGAGCGAAACAACACAGCTACATAAACAGAACAGTATCTTCCGTGAGAGGATTGATTCTGTCGAGAGAAATCGTAAGAGCACAATTATACGAGAGTTTCCAGTTCGTTATTTCCAGCCAAGGCAGCAATCAGCTGTTCATCCGTCTCTTTCAGCTCAGCCGCTCACTTCTCCAAAAGAGACTGTGATTTCTCAAGGCCCTCAC…	MVCSGRLADSSTGGDCCVTGPLLEVDDGLVMLLLDGGRRSSVSGEGRLDRARRSRMRKQQRLREFMSETTQLHKQNSIFRERIDSVERNRKSTIIREFPVRYFQPRQQSAVHPSLSAQPLTSPKETVISQGPHETSGTGGTT*
373	Nicotiana benthamiana	NBEN_76	NBEN_bZIP.Niben101Scf03282.2		St	Niben101Scf03282	488750-491956	ATGGCGTTGTGTTTGCATAACAAGAATCAGATAATGGATAACAGCAAGTATGTGAGGTACACACCAGAACAAGTGGAAGCTCTAGAGAGAGTGTATGCAGAATGTCCAAAGCCTACTTCTTTGAGGAGGCAACAGCTCATTAGAGAGTGTCCCATTCTCTCTAATATTGAACCTAAACAGATCAAAGTCTGGTTTCAGAACCGAAGATGCCGTGAAAAACAGAGGAAGGAAGCATCCCGTCTCACAACTGTTAACAGGAAGCTAAGTGCTATGAACAAGCTGTTGATGGAAGAAAATGACCGGTTGCAGAAGCAAGTCTCACAGCTTGTGTATGAGAATGGCTACATGAAACAACAAATCAATACTGTTAGCAGCACGACCACAGATACAAGCTGTGAA…	MALCLHNKNQIMDNSKYVRYTPEQVEALERVYAECPKPTSLRRQQLIRECPILSNIEPKQIKVWFQNRRCREKQRKEASRLTTVNRKLSAMNKLLMEENDRLQKQVSQLVYENGYMKQQINTVSSTTTDTSCESVVVNGQQQRKNPTPQHPERDANNPAGLLAIAEETLAEFLGKATGTAVDWVQMIGMKPGPDSIGIVAVSRNCSGVAARACGLVSLEPTKVAEILKDRPSWYRYCRCLNILSVIPTGNGGTIELIYLQTYAPTTLASARDFWTLRYTTSLEDGSLVICERSLTTATGGPTGPPATSFVRAEMLPSGYLIRPCEGGGSMIHIVDHIDLDAWSVPEVLRPLYESSKILAQKMTVAVRKLESVELSNLQHDIVIC*
374	Nicotiana benthamiana	NBEN_77	Niben101Scf03307g04012.1		S	Niben101Scf03307	465111-465404	ATGGTGTGTTCTGGTCGTTTGGCGGACAGCAGCACTGGTGGAGATTGCTGCGTCACTGGTCCGTTGCTGGAGGTTGACGACGGGCTGGTGATGTTGCTGCTCGACGGAGGAAGACGCAGCAGCGTTTCAGGTGAGGGTCGTTTGGACAGGGCTCGGAGGTCACGAATGAGGAAGCAACAGCGATTGAGGGAGTTTATGAGCGAAACAACACAGCTACATAAACAGAACAGTATCTTCCGTGAGAGGATTGATTCTGTCGAGAGAAATCGTAAGAGCACAATTATACGTGATTAA	MVCSGRLADSSTGGDCCVTGPLLEVDDGLVMLLLDGGRRSSVSGEGRLDRARRSRMRKQQRLREFMSETTQLHKQNSIFRERIDSVERNRKSTIIRD*
375	Nicotiana benthamiana	NBEN_78	Niben101Scf03374g06024.1		S	Niben101Scf03374	624266-624559	ATGGTGTGTTCTGGTCGTTTGGCGGACAGCAGCACTGGTGGAGATTGCTGCGTCACTGGTCCGTTGCTGGAGGTTGACGACGGGCTGGTGATGTTGCTGCTCGACGGAGGAAGACGCAGCAGCGTTTCAGGTGAGGGTCGTTTGGACAGGGCTCGGAGGTCACGAATGAGGAAGCAACAGCGATTGAGGGAGTTTATGAGCGAAACAACACAGCTACATAAACAGAACAGTATCTTCCGTGAGAGGATTGATTCTGTCGAGAGAAATCGTAAGAGCACAATTATACGTGATTAA	MVCSGRLADSSTGGDCCVTGPLLEVDDGLVMLLLDGGRRSSVSGEGRLDRARRSRMRKQQRLREFMSETTQLHKQNSIFRERIDSVERNRKSTIIRD*
376	Nicotiana benthamiana	NBEN_79	Niben101Scf03419g13003.1		S	Niben101Scf03419	1335925-1336344	ATGATGTTCGATGAGCCGGTTCACTATCATCTCCCGGTTCTTGAAGATGTTCTTTCACCTAGTGATATCCATGAAATTTTATCTTTTTTACAAACAGAACTTCCGGTACAGTCTACGTCCGGTTCAGAAACAACCAGGTCTGTCTTTACCGTAGAAGAAAGGAAGCGACGCAGAAAAGTATCTAACCGTGAATCCGCCCGGCGGTCCAGATTTCGAAAGAAAAAGCACTTAGATAACCTCACGGACCAAGTGGACCAGCTCAAAATCGAAAACCGGGAGCTAAAGAACCGATTGTACGTTGCTACGCACCAGTGTCAAGTAGCTCAAAGTGAAACGGACCGGCTTATCCTTGAGTCTATTGTCCTTCAACAAAAATTAGCCGGTTTATGCCAAATCTTG…	MMFDEPVHYHLPVLEDVLSPSDIHEILSFLQTELPVQSTSGSETTRSVFTVEERKRRRKVSNRESARRSRFRKKKHLDNLTDQVDQLKIENRELKNRLYVATHQCQVAQSETDRLILESIVLQQKLAGLCQILHPMQLQ*
377	Nicotiana benthamiana	NBEN_80	Niben101Scf03494g05002.1		D	Niben101Scf03494	532352-541832	ATGGGATTTGAGAGAGCTTTTGTTGAGAGTTCACCTGAGCAAGAAAATAAGCTTTTTTTTGGTGTTGATGTTTCTTATATGGATTCTTCTAACAAAAGCTACGACGCGTTAGAAAGTAATAATCAGATATCATTTGGAGGTCAGCATCAACATCATCAACAACAGTTTTTTTATAATCATCATCAACAACAGCAGCTGCAAAATAATAATCAGATATCTTTTAGGATGATGCAACAGTCATCTTCTGCTATTCCTGGAAGTCTCATCAGAAGCAAAGACAGTGCTGGCGCTTATGATTTAGGTGAACTAGATCAAGCACTTTTTCAATATCTTGATGGCCAAGAACCTTCATCAATCCAAGAACAAAGACAAAATTCAGGTATGAGACCACCAACTCTG…	MGFERAFVESSPEQENKLFFGVDVSYMDSSNKSYDALESNNQISFGGQHQHHQQQFFYNHHQQQQLQNNNQISFRMMQQSSSAIPGSLIRSKDSAGAYDLGELDQALFQYLDGQEPSSIQEQRQNSGMRPPTLNIFPSQPMHVEPSTANKMNTGLVSPAISGSKRSSQPSMELSNNLKNNDAPSASGPEPPKAAKREANRKGPTSSSEQDGPKTPDPKTLRRLAQNREAARKSRLRKKAYVQQLESSRIRLTQLEQELQRARAQGYYFGGNSHLGGEQNLPVNMANMSSDAAVFDMEYARWLEEHHRLMCELRNAVQEHFPENELRIYVDNCVTHYDEIMNLKSMLTKSDVFHLVSGMWKTPAERCFMWMGGFRPSELLKVHAAVFDMEYARWLEEHHR…
378	Nicotiana benthamiana	NBEN_81	NBEN_bZIP.Niben101Scf03520.1		A	Niben101Scf03520	212311-214193	ATGTGCAATCCAAAAGGTGCCTCTTCCGTTTCCCATTCACACCCTTTAAATAAAACACAACACATGCCAATGCCTATCCGATTTTATTCAGATATTGATTTTGAGAATCATCAGTCTATATATGGATGTTGTAATAAGAAGATAACAAATATGGCATTGACAACAGCACCAACAACGTCGAATGACAGTCATTTAAGTGGCGAAAGGAAGAGAACTTTTGCAGATGAGAAAAAGGAGAAAAGTATTGAAAGGAGGCAGAGAAGGATGATCAAGAATAGGGAATCAGCTGCTAGGTCAAGAGCAAGGAAACAGGCTTACACAAAACAATTGGAGCAAAAGGTGTTAGAGTTGAGGAACAGTAACAATTGGCTGAAAAGGCAAAAGGACTTGGAGAAATTT…	MCNPKGASSVSHSHPLNKTQHMPMPIRFYSDIDFENHQSIYGCCNKKITNMALTTAPTTSNDSHLSGERKRTFADEKKEKSIERRQRRMIKNRESAARSRARKQAYTKQLEQKVLELRNSNNWLKRQKDLEKFMSSNVADSEPRYQLRRTSSRPSEPQFSH*
379	Nicotiana benthamiana	NBEN_82	Niben101Scf03570g01006.1		I	Niben101Scf03570	123410-130570	ATGGATAAGGATAAGTCTTCAAGCCATACAGTAGGTTCATTGCCTCCATTCGGGAGATACTCATTGTTTTCACCTCCTGGGGGTAGTTCCAATGCAAAGTTGGAACAATCTGGATTAGCTAATTTACCTCCCTTAGGACCTGGAAATGCTTCAGAATCAGGTCATTTTGGTCATGGTTTGTCGGCTGATTCTAGCCGATTTAGTCATGATATAAGCCGAATGCCTGATAACCCGCCTAAGAAATTTGGTCATCGGCGTGCCCACTCGGAGATTCTTACTCTTCCTGATGATATTAGCTTTGATAGTGATCTTGGTGTTGTTGGTGGACTGGATGGACCATCTCTGTCGGATGAGACTGAGGAGGACTTCCTCTCAATGTACCTTGACATGGATAAGTTT…	MDKDKSSSHTVGSLPPFGRYSLFSPPGGSSNAKLEQSGLANLPPLGPGNASESGHFGHGLSADSSRFSHDISRMPDNPPKKFGHRRAHSEILTLPDDISFDSDLGVVGGLDGPSLSDETEEDFLSMYLDMDKFNSSSVSSDFQEGESSSSAAAASGSLQIPAMASAASGSDNVGPTASAKSRVRHQHSQSMDGSTTIKPEMLMSGIDEASPLETKKATSAAKLAELALVDPKRAKRIWANRQSAARSKERKMRYIAELERKVQTLQTETTTLCAQLTLLQRDTNGLTAENSELKLRLQTMEQQVHLQDALNDALKEEIQHLKVLTGQGIANGGPMMNFPTSFGHNQQFYSNNHAMHTLLAAQQLQQLQIHSHKQQHQFQQHQLHQFQQQQQLQHQQQLQ…
380	Nicotiana benthamiana	NBEN_83	NBEN_bZIP.Niben101Scf03584.1		I	Niben101Scf03584	29955-35631	ATGATCCTTAGAGACACGGTGCAGCGAGGAGGTGCCAATAAGGTTACATTAGATGCTGATGGAGCCTTGAGATTGCGGGGGCGAGTTTGTGTGCCCAATATGGATGGACTTCGAGAATTGATCATAGAAGAGGCCCATAGTTCCCGATACTTTATTCATCTGGGTGCTGCAAAGATGTACCAGGATTTGCGGCAGTATTACTGGTGGCGTAGAATGAAGAAGGATATTGTGGCATATGTGGCGCTTTTCTTTCCTTTAGCAGAGTTTGCCTACAACAACAGCTACCAGTCGACCATTCAGATGGCTCCATATGAGGCTTTATATGACAGCCAGGTTCGACACTTGAGGTCAAAGAGTTTTCTTGGTGCGTGTGCAGTGGAGAGTTCAGCCTCCCGAGGC…	MILRDTVQRGGANKVTLDADGALRLRGRVCVPNMDGLRELIIEEAHSSRYFIHLGAAKMYQDLRQYYWWRRMKKDIVAYVALFFPLAEFAYNNSYQSTIQMAPYEALYDSQVRHLRSKSFLGACAVESSASRGIELGVRILANRQSVARPKERKTRYTGELGREVQTLQTEATTLSAQ*
381	Nicotiana benthamiana	NBEN_84	Niben101Scf03624g06004.1		S	Niben101Scf03624	594913-595206	ATGGTGTGTTCTGGTCGTTTGGCGGACAGCAGCACTGGTGGAGATTGCTGCGTCACTGGTCCGTTGCTGGAGGTTGACGACGGGCTGGTGATGTTGCTGCTCGACGGAGGAAGACGCAGCAGCGTTTCAGGTGAGGGTCGTTTGGACAGGGCTCGGAGGTCACGAAGGAGGAAGCAACAGCGATTGAGGGAGTTTATGAGCGAAACAACACAGCTACATAAACAGAACAGTATCTTCCGTGAGAGGATTGATTCTGTCGAGAGAAATCGTAAGAGCACAATTATACGTGATTAA	MVCSGRLADSSTGGDCCVTGPLLEVDDGLVMLLLDGGRRSSVSGEGRLDRARRSRRRKQQRLREFMSETTQLHKQNSIFRERIDSVERNRKSTIIRD*
382	Nicotiana benthamiana	NBEN_85	Niben101Scf03647g01004.1		B	Niben101Scf03647	91062-94484	ATGGCTGGCCCGATTTTGGCCGATCCACCGCCGTCTGCAGTGGCGAATCCCACCGGTGAATTCGACGGTCTTCCAATTCCACCGCTTGACCCTACCTATTTTGCCCAACACATGACTGCAGCAGATCAAGGAAAAATCGATGGGTTTCCAATGGAATTACCGGCTGATGGTGAATTCATGCTTGATGACCTCGATTTTGATTTATCCTTCGATGATATCTTCCTTAATAACGGTGATGCCGTTCTCAACCCTGATTTCCTGGCCGATTGTCTCGTGTCGGATACGGATCGAGTTGACCCGAGTTTTTATGGTCAACCTGGGAATCAATCTGGAGAGGAACCTCCGGGTTCGAAATTTGTTCCAGCTAACCTGAATTGCTTTGGTCAACCTGGGAGTCAA…	MAGPILADPPPSAVANPTGEFDGLPIPPLDPTYFAQHMTAADQGKIDGFPMELPADGEFMLDDLDFDLSFDDIFLNNGDAVLNPDFLADCLVSDTDRVDPSFYGQPGNQSGEEPPGSKFVPANLNCFGQPGSQLVGDFNDSSRYFKSTSAEFCNFSGNQAAGGVVVMDTSSPELRQSSSGSDVLNAPSSTSSHQVSGDVARYLNVPSLESNGSNHEGSRESANDNKGLGDARVLNCHSPESQGSGNCGSNVSEGLNYPSDSNKSVHSSPNFGNNSIKKGTVEEKIKLEGVDANISKCSSLLKRKTSSEDSNNISIHQKLTNVALSDNVNNDEDDKKRARLIRNRESAQLSRQRKKHYVEELEDKVRIMHSTIQDLNARISYIMAENATLKTQLGDAGVP…
383	Nicotiana benthamiana	NBEN_86	Niben101Scf03660g02016.1		S	Niben101Scf03660	297473-297766	ATGGTGTGTTCTGGTCGTTTGGCGGACAGCAGCACTGGTGGAGATTGCTGCGTCACTGGTCCGTTGCTGGAGGTTGACGACGGGCTGGTGATGTTGCTGCTCGACGGAGGAAGACGCAGCAGCGTTTCAGGTGAGGGTCGTTTGGACAGGGCTCGGAGGTCACGAATGAGGAAGCAACAGCGATTGAGGGAGTTTATGAGCGAAACAACACAGCTACATAAACAGAACAGTATCTTCCGTGAGAGGATTGATTCTGTCGAGAGAAATCGTAAGAGCACAATTATACGTGATTAA	MVCSGRLADSSTGGDCCVTGPLLEVDDGLVMLLLDGGRRSSVSGEGRLDRARRSRMRKQQRLREFMSETTQLHKQNSIFRERIDSVERNRKSTIIRD*
384	Nicotiana benthamiana	NBEN_87	Niben101Scf03693g08007.1		G	Niben101Scf03693	808599-825447	ATGGGAGCTGGGGATGAGAGCACCCCTACAAAGCCTTCAAAACCGGCTTCAACTCAGGAGACACAAACTACACCCTCATATCCTGATTGGTCAACCTCTATGCAGGCTTATTATAGCGCTGGAGCTACTCCTCCCTTCTTTGCCTCATCTGTTGCTTCTCCTGCTTCCCACCCATACTTGTGGGGAGGCCAGCATCCTCTTATGCCTCCTTATGGGGCTCCAGTCCCGTATCCAGCTTTATATCCTCCTGCTGGAGTTTATGCTCATCCTAACATGGCCACGCACACTCCAAACGCTGTGCAGGCAAATCTTGAATCAAACGGGAAGGATCCTGAAGGAAAGGATCGGAGTACGAACAAAAAGTTAAAGGCCAGTTCTGGTGGCAAGATAGGCGACAGC…	MGAGDESTPTKPSKPASTQETQTTPSYPDWSTSMQAYYSAGATPPFFASSVASPASHPYLWGGQHPLMPPYGAPVPYPALYPPAGVYAHPNMATHTPNAVQANLESNGKDPEGKDRSTNKKLKASSGGKIGDSGKVASGSGNDGATQSDETRSEGTSDTNDENDNLEFAASKKGSFDQMLADGASAQNNPTTANHQTSMHAIPVTVPATNLNIGMDVWNASSAGPGAIIIQPNANGPVIGHEGRMNDQWVQDERELKRQKRKQSNRESARRSRLRKQAECEELQRRVEALSGENHSLKDELQRLSEECEKLTSENSSIKEELTRLCGPDAVSKLESNGNAIHLQSNAEEAS*
385	Nicotiana benthamiana	NBEN_88	NBEN_bZIP.Niben101Scf03830.1		D	Niben101Scf03830	224388-229894	ATGCAAGCTTTCAAAGCAGCAGTATTACCAGCTGTTACTATTAATAATAGTAATAATAATAACAATTCTAATATGTACTGCCACTCATCTTTTTACCTCAGAGGTGATGAGGCAAGTAGACATGCAGCAGCACGTTTTGCTGATATTGGAGAGCTTGAACAGTCTGCAGGATTTCCTCAAGAAGATGCTGTTGATTTAAGCAGAAGTTCAGTATTTGGTGAGATGAGACCAAACTATGTTGCTGTTGTTTCTTCTGATAATAACTTGCATTTTGAAACAGGAGGGGTGGAAGCAGGGGGGAGGTATATGTTGCACAAGGCACAAACAGCAATGGTGGGTGGTGGTGGTGTAGTGGGTGGTGGTGCTGTGACTTTGGGAAATGGCCATTTTGAGAATTGG…	MQAFKAAVLPAVTINNSNNNNNSNMYCHSSFYLRGDEASRHAAARFADIGELEQSAGFPQEDAVDLSRSSVFGEMRPNYVAVVSSDNNLHFETGGVEAGGRYMLHKAQTAMVGGGGVVGGGAVTLGNGHFENWADSGIADHSHSQQTDTSTDVDTDERNHQGQGVQHGALMAVHSIDQSKVKHGDQKTLRRLAQNREAARKSRLRKKAYVQQLETSRLKLSQLEQELKRARQQGIFIANGYAGDQSLSAGGNGALAFDMDYARWLEDHQRLISDLRSAVNSHRGDNELRLLVDGVMLHYDEIFKLKSVGAKSDVFHMLSGMWKTPAERCFMWLGGFRSSELLKILGNHLEPLTEQQLMGICNLQQSSQQAEDALSQGMEALQQSLVDTLSSTSLGPTGS…
386	Nicotiana benthamiana	NBEN_89	NBEN_bZIP.Niben101Scf03851.1		S	Niben101Scf03851	71280-72142	ATGATATCTAATCGAGAGTCGGCACGAAGATCACGCATGCGCAAGCAGAAGCACCTCGACGAGCTATGGGCACAGGTTATTTGCCTCTGGAATGAGAATCACCAGCTCCTAATCAAACTTAACCATGCCTCTGAGAGCCATGATCAGGCACTTCAAGAAAATGCTCAACTCAAAGAAGAAACTTCAGCACTTCGTCAAATGGTTACTAACATGCAGCTCATGAATAGTCGTAATTATCCTTGCTCAAGAGATGTGTATTGTGAACCTTGTAGTGGTTCATCTCAAAATGAATAG	MISNRESARRSRMRKQKHLDELWAQVICLWNENHQLLIKLNHASESHDQALQENAQLKEETSALRQMVTNMQLMNSRNYPCSRDVYCEPCSGSSQNE*
387	Nicotiana benthamiana	NBEN_90	Niben101Scf03853g01008.1		S	Niben101Scf03853	185082-185916	ATGGTGTGTTCTGGTCGTTTGGCGGACAGCAGCACTGGTGGAGATTGCTGCGTCACTGGTCCGTTGCTGGAGGTTGACGACGGGCTGGTGATGTTGCTGCTCGACGGAGGAAGACGCAGCAGCGTTTCAGGTGAGGGTCGTTTGGACAGGGCTCGGAGGTCACGAATGAGGAAGCAACAGCGATTGAGGGAGTTTATGAGCGAAACAACACAGCTACATAAACAGAACAGTATCTTCCGTGAGAGGATTGATTCTGTCGAGAGAAATCGTAAGAGCACAATTATACTTATCTAA	MVCSGRLADSSTGGDCCVTGPLLEVDDGLVMLLLDGGRRSSVSGEGRLDRARRSRMRKQQRLREFMSETTQLHKQNSIFRERIDSVERNRKSTIILI*
388	Nicotiana benthamiana	NBEN_91	Niben101Scf03953g06003.1		A	Niben101Scf03953	692535-696773	ATGGGTTCTTACCTGAACTTCAAGAAATTTGCTGACACATCACAACCAGAGAGCAGTGGTGGGAAGCCCATGAATAATGATAATTTTTCGTTGGCTCGACAATCTTCCATATACTCGTTTACCTTTGATGAGCTCCAAACTACATGTGGACTTGGGAAAGATTTTGGGTCAATGAATATGGACGACCTATTGAAGAACATTTGGACAGCTGAAGAGTCTCAAGCCATGTCATCTTCTGTTGCTGGTGGAAATGTAAGTGCGCCAGTGGGAGATTTGCAGAGACAGGGTTCTTTGACATTGCCTAGGACAATAAGTCAGAAAACTGTTGATGAAGTATGGAAAGACTTTCAGAAAGAGACTGTTAATGCTAATGATGGATGTGCCCCTGGAGCATCAAAC…	MGSYLNFKKFADTSQPESSGGKPMNNDNFSLARQSSIYSFTFDELQTTCGLGKDFGSMNMDDLLKNIWTAEESQAMSSSVAGGNVSAPVGDLQRQGSLTLPRTISQKTVDEVWKDFQKETVNANDGCAPGASNFGQRQSTLGEMTLEEFLVRAGAVREDMQPTRYSKDVTFPSGFAQPSSNNSSLTIAFQQATQNPQQLSNQIAGTNIFNVVTTTSSQQKPQKAQPLFPKQTTVAFAAPMQLGNTAQLASPGARAPIVAMSNPSVNTSIIQGSIMQGGVMDMAGSPGNLDAPSLSPSPYACGEGGRGRRSCTSFEKVVERRRKRMIKNRESAARSRDRKQAYTLELEAEVAKLKEIKQELQKKQAEFIEKQKNQLLEKMNMPWENKLICLRRTVTGPW*
389	Nicotiana benthamiana	NBEN_92	Niben101Scf04011g00006.1		D	Niben101Scf04011	35004-41158	ATGAATTCAACATACACTCAATTCGTTACCTCTAAAAGGATGGGCATATGTGATCCAATCCATCAAATTGGAATGTGGGGAGATTTCAAAGCCAGCAGCTACCCTGATACGTCGGCAACCTTGATTCTTGAAGTCGAGAATTGTCTAGAGAACGAGATGCCTATTATGGAGAAAAGACTACACAATGAGATAGAGGAACTTTCACATGGAACAGTTGGAACGTCTAACAGATATGAACCAGAAGCACGTAAACCTATTGATAAGGTGCTTAGACGCCTTGCACAAAACCGCGAAGCTGCTCGTAAAAGTCGTTTACGGAAAAAGGCCTATGTTCAGCAGTTAGAAAATAGTAAACTGAAGCTGCTTCAGTTGGAAGAAGAACTAGAACGTACTAGAAAA…	MNSTYTQFVTSKRMGICDPIHQIGMWGDFKASSYPDTSATLILEVENCLENEMPIMEKRLHNEIEELSHGTVGTSNRYEPEARKPIDKVLRRLAQNREAARKSRLRKKAYVQQLENSKLKLLQLEEELERTRKQGLYAGGSLDESQIGYNGTANSGIAAFEMEYIFWVEEQDRQTDELRSALNSQVGEIELHLLVESCLNHYFDLFRMKATAAHADVLFLMTGTWKTSAERFFLWIAGFRPSELLKVLTPNVEPLTEQQLREVCNLTQSCQQAEDALSQGMVKLHQILAEAVAAGTLGEGIILPQMAATIEKLEALVRFVNQADHLRQETLLQMSCILTPQQSAQGLLALGEYFKRLRALSSLWTSRTSEPA*
390	Nicotiana benthamiana	NBEN_93	Niben101Scf04122g03002.1		S	Niben101Scf04122	302669-302962	ATGGTGTGTTCTGGTCGTTTGGCGGACAGCAGCACTGGTGGAGATTGCTGCGTCACTGGTCCGTTGCTGGAGGTTGACGACGGGCTGGTGATGTTGCTGCTCGACGGAGGAAGACGCAGCAGCGTTTCAGGTGAGGGTCGTTTGGACAGGGCTCGGAGGTCACGAATGAGGAAGCAACAGCGATTGAGGGAGTTTATGAGCGAAACAACACAGCTACATAAACAGAACAGTATCTTCCGTGAGAGGATTGATTCTGTCGAGAGAAATCGTAAGAGCACAATTATACGTGATTAA	MVCSGRLADSSTGGDCCVTGPLLEVDDGLVMLLLDGGRRSSVSGEGRLDRARRSRMRKQQRLREFMSETTQLHKQNSIFRERIDSVERNRKSTIIRD*
391	Nicotiana benthamiana	NBEN_94	Niben101Scf04173g03012.1		S	Niben101Scf04173	362277-362655	ATGGCAGCGAATGTAAAAAAAAAAGAAGTGGTTGCTTCTGATGCAGACCAGCAGTATGCAAAGTTTGACGAAAGGATAAAGGAAGATGGTGAGGGTCGTTTGGACAGGGCTCGGAGGTCACGAATGAGGAAGCAACAGCGATTGAGGGAGTTTATGAGCGAAACAACACAGCTACATAAACAGAACAGTATCTTCCGTGAGAGGATTGATTCTGTCGAGAGAAATCGTAAGAGCACAATTATACGTGATTAA	MAANVKKKEVVASDADQQYAKFDERIKEDGEGRLDRARRSRMRKQQRLREFMSETTQLHKQNSIFRERIDSVERNRKSTIIRD*
392	Nicotiana benthamiana	NBEN_95	Niben101Scf04173g03008.1		S	Niben101Scf04173	367348-367641	ATGGTGTGTTCTGGTCGTTTGGCGGACAGCAGCACTGGTGGAGATTGCTGCGTCACTGGTCCGTTGCTGGAGGTTGACGACGGGCTGGTGATGTTGCTGCTCGACGGAGGAAGACGCAGCAGCGTTTCAGGTGAGGGTCGTTTGGACAGGGCTCGGAGGTCACGAATGAGGAAGCAACAGCGATTGAGGGAGTTTATGAGCGAAACAACACAGCTACATAAACAGAACAGTATCTTCCGTGAGAGGATTGATTCTGTCGAGAGAAATCGTAAGAGCACAATTATACGTGATTAA	MVCSGRLADSSTGGDCCVTGPLLEVDDGLVMLLLDGGRRSSVSGEGRLDRARRSRMRKQQRLREFMSETTQLHKQNSIFRERIDSVERNRKSTIIRD*
393	Nicotiana benthamiana	NBEN_96	Niben101Scf04240g02011.1		G	Niben101Scf04240	248561-260371	ATGGGGGCTGGGGAAGAAAGCATCCCTGCAAAGCCTTCAAAAGCTACTTCAACTCAGGAGACGCAAGCTACACCTTCATATCCCGATTGGTCAAGTTCTATGCAGGCTTATTATGGTGCTGGAGCTGCACCTCCCTTCTTTTCCCCAACTGTTGCTAGTCCTTCTCCCCATCCATACATGTGGGGAGGCCAGCATCCGCTTATGCCTCCTTATGGTGCTCCAGTCCCATATCCAGCTTTATATCCTCCTGCTGGAGTTTATGCTCATCCTAATATGCCCATGACTCCAAACCCACTGCAGGCAAATCCAGAATCAGATAGTAAGGCACCTGATCCTAAGGACCAGAGTACAAGCAAAAAATTAAAGGGATATACAGGTGGCAAGGCAGGAGAAAGTGGG…	MGAGEESIPAKPSKATSTQETQATPSYPDWSSSMQAYYGAGAAPPFFSPTVASPSPHPYMWGGQHPLMPPYGAPVPYPALYPPAGVYAHPNMPMTPNPLQANPESDSKAPDPKDQSTSKKLKGYTGGKAGESGKVTSGSGNDGATRSAESGSEGSSDANDENDNHEFSANKSRNFDLMLANGASSQNNPATGNPVAMPATNLNIGMDLWNASSAGPGMIKMRSNQSGVAPAPGIGREWIQDERELKRQKRKQSNRESARRSRLRKQAECEELQQRVETLSNENHALKEEMRKLSEECEKLTSENNSIKEELTRLCGPEAVSKLESNANATHLQSNLDEANS*
394	Nicotiana benthamiana	NBEN_97	Niben101Scf04430g03018.1		S	Niben101Scf04430	494803-495381	ATGATTTCATCAGAGGCTGCAACAATCCCCTACTTAGCTCAAGAAAACAACCCCTCATCACTTCCCATTGATTTCTGCTTCATACACAAAAACTTACCAGCATTCCAATACAACACATTCTTAACAAACAACAATATACAAAACTATCAGGCCTCTTTTCCTGTTCAAGACTTCAGCCAACAGCCCTCATGCATCAGCAGTAACTCGACCTCTGATGAATCGGAGGAACAACAAATCAGAATTATCGATGAACGAAAGCAAAGGAGAATGGTATCTAATAGGGAATCAGCTAGAAGATCAAGGATGAGGAAGCAGAGGCATCTTGATGAGCTATGGTCCCAAGTTCTTCGCCTTCGAACAGAGAATCAGAATCTGATGAATAAACTAAACCAAGTCACA…	MISSEAATIPYLAQENNPSSLPIDFCFIHKNLPAFQYNTFLTNNNIQNYQASFPVQDFSQQPSCISSNSTSDESEEQQIRIIDERKQRRMVSNRESARRSRMRKQRHLDELWSQVLRLRTENQNLMNKLNQVTESHDKVIQENMQLKEEASDLRRMITDIQIDCPFHAFSDLDEVTCNTAHLKAESSNQSTT*
395	Nicotiana benthamiana	NBEN_98	Niben101Scf04473g06001.1		S	Niben101Scf04473	671800-674204	ATGTCAGCTTTAAGGCAAAGTGGTAGTAGTTCTGCATCAGAAAGAGATCAAAGATATGCATGCATGGATGAAAAGAAAAGAAAAAGAATGATTTCAAATAGGGAATCTGCAAGGCGATCTAGGATGAAGAAACAAAATCTTGTGCAAGAATTGACAAAGGAAGTCAGCAAATTACAAGCAGCCAACAGAACCATTGTGGCTAAAATTGAAGAGACTACAGAGAGGTTGACATATTGCACTGCTCAGCATAATGTGTTGAGGGCACAGGAAACTGAGTTAACAGATAGGTTAAAGTCTCTAAATGATTTGATTAATCATAGTGGTTTGGTTACTGATGTTACTAATGTTGCTGACTGTTTGCTAAAGCCATGGCAGATAACTTGTTCAATGCAGCAAATC…	MSALRQSGSSSASERDQRYACMDEKKRKRMISNRESARRSRMKKQNLVQELTKEVSKLQAANRTIVAKIEETTERLTYCTAQHNVLRAQETELTDRLKSLNDLINHSGLVTDVTNVADCLLKPWQITCSMQQISASSGFKLQAANRTIVAKIEETTERLTYCTAQHNVLRAQETELTDRLKSLNDLINHSGLVTDVTNVADCLLKPWQITCSMQQISASSGLFQY*
396	Nicotiana benthamiana	NBEN_99	Niben101Scf04505g07006.1		D	Niben101Scf04505	715173-758130	ATGGCATGGATATTGATAATAAACAAAGATAATAGTGGAGCTTATGATTTGGGAGAACTGGATCAAGCACTTTTTCTTTATCTTGATGGACAAGAGCCTTCTTCAATCCAAGATCAAAGACAGAATTCTGGGATGAGGCCACCAACTCTCAATATCTTTCCATCACAACCAATGCATATCGAGCCTTCCTCAACTAAGGTAAATAATGGATTAGTTTCTCAAGCAGCAAGTGGTTCCAAGAAATCATCTCAGCCGTCCATGGCTAAATCTGATGTTGTTCCTTCTGCTTCTGGACCTGAACCACCCAAAACTGCTAAGCGTGAGGGAATCCGGAAGGGTCCAACTTCAAGTTCAGAGCAAGATGCACCCAAAACACCAGACCCCAAGACATTAAGGAGA…	MAWILIINKDNSGAYDLGELDQALFLYLDGQEPSSIQDQRQNSGMRPPTLNIFPSQPMHIEPSSTKVNNGLVSQAASGSKKSSQPSMAKSDVVPSASGPEPPKTAKREGIRKGPTSSSEQDAPKTPDPKTLRRLAQNREAARKSRLRKKAYVQQLESSRIRLAQLEQEIQRARSQITSFTLKDTIASDALACPQNMANYMGQMALAMNKLATVEGFLRQADNLRHQTIHRLHQILTTRQAERCFLAIGEYFHRLRALSSLWLARPRQE*
397	Nicotiana benthamiana	NBEN_100	NBEN_bZIP.Niben101Scf04608.1		I	Niben101Scf04608	451188-452409	ATGGACCCGAAGTTCGCCGGAAAGCCCATTCAGGCCCAATTCCTATCAGGTCAAACTGACCTTGACCAGATGCAGGATACTCCGACCTGTGGGTCACGTCATCGCCGGGCCCAATCCGAAACCTTTTTTCGGTTTCCAAACTTCGATGATGACATCCTCTTAGACGACGCCGTTACAGACTTCAACCTCGATGTTCAGGTGCCGCCCCTCATGCAGCAGCAGCAGCCTGCAAATTCGGCTGATTCTTTGTCAACTGGGCCGGCGTTATCAGCTGGGCCTTCCGATAATAACCCTAAGCCGCTGGCCCACTACCGTAGTCTCTCTCTGGATGCTGATTTTTTCGATGGACTTGGCTTTAGTGCTGCGGCGGCAGAGAATAAGATGATGGGTGGTGGCCCG…	MDPKFAGKPIQAQFLSGQTDLDQMQDTPTCGSRHRRAQSETFFRFPNFDDDILLDDAVTDFNLDVQVPPLMQQQQPANSADSLSTGPALSAGPSDNNPKPLAHYRSLSLDADFFDGLGFSAAAAENKMMGGGPRQKILANRQSAARSKQRKTRYTGELERKVQTLQTEATTLSAQITVLQNYGLECINGCGRGNRRNYNRHHYDNEDNKDS*
398	Nicotiana benthamiana	NBEN_101	Niben101Scf04608g05035.1		I	Niben101Scf04608	524591-549903	ATGGGTATGCCAAGAAACACAGGTGGGGGAGGAATTGCAGTAGTGGGTATTGATATGTTAAGTGAAAGAGCAGCAAAGATGAGAGAAGCAGTACATAAGAGTCAGTCCATTACAGATAACATGGTTTCTATTTTGGGCTCTTTTGACCATCGTCTTTCTGCTCTTGAAACTGCTATGCGTCCAACCCAGATTAGGACTCATGCTATCCGGAAGGCTCATGTGAACATTGATAAGACTTTGAAGGCTGCGGATGTTATACTGTCCCAATTTGATCTTTCTCGTCAGGCGGAGGCGAAAATACTTAAAGGTCCACACGAGGACCTAGAAAGTTACCTTGAAGCAATTGAACAACTGAGAAACAACATTCGCTTCTTCGACCAAAAGCTTCAAGATGATGGA…	MGMPRNTGGGGIAVVGIDMLSERAAKMREAVHKSQSITDNMVSILGSFDHRLSALETAMRPTQIRTHAIRKAHVNIDKTLKAADVILSQFDLSRQAEAKILKGPHEDLESYLEAIEQLRNNIRFFDQKLQDDGVLKNANSLLAKAISKLEEEFKQLLSSYSKPVEPKRLFECLPNSMRPSSGSPGESNGKNHLSSSHAEHNNGTDNAVYTPPTLIPPRILPLLHDLVQQMVQAGHQQQLVKIYRDTRSPVLEESLRKLGVEKLSKDDVQKMQWEVLEFKIGNWIHFMRIARLAQTAQETFRDFEEAVEKDATKTAVSDGTVHPLTSYVINYVKFLFDYQSTLKQLFQEFENGDSNSQLASVTMRIMQALQTNLDGKSKQYKDSALTNLFLMNNIHYMVR…
399	Nicotiana benthamiana	NBEN_102	Niben101Scf04614g07005.1		E	Niben101Scf04614	697593-702631	ATGTTGATCCTGGACTCCACTTCAGAGGGATCAGGATCGGGATCGGATCACCATCATCGGTGTAACTCGGAGAGCTTTCTTATAGAGGAGCAACCTTCTTGGCTTGATGACCTCTTGAATGAACCGGCAGAAACAGTAGCTGTACACAAAGGTCATCGCCGTTCAGCTAGCGACACTTTTGCGTACGTAGGAACAGCTGCAGAAAGGTTAAACACAAGGGAAAATAACAACAATGTAAATGTAGGAGGATCTTCAATCAACTACGTCAGTTACAAAGATCAGTTTACTTCAGTTTCCTATGACACAAAGCCAACTTCTGCTAAGGCTGCTCTGGAATTGAATGAGAAGCATAGCAGACAGGTCATAAGTACACAAAACAAAGAGGGCTCTAATGAAAGA…	MLILDSTSEGSGSGSDHHHRCNSESFLIEEQPSWLDDLLNEPAETVAVHKGHRRSASDTFAYVGTAAERLNTRENNNNVNVGGSSINYVSYKDQFTSVSYDTKPTSAKAALELNEKHSRQVISTQNKEGSNERSNNTQAKHAMSKADAKRAKQQSAHRSRVRKLQHIAELERTVQALQAEGSELSAELEFLDQQNIILSMENRALRQRLDSLSQEQLIKDLEQEMLERELTRLQTLYQMQRQQMQQQQHQQPQQQNQSKHRRNKSRDLEAQFANLSIKNNEASSSKFRLLVQSGCK*
400	Nicotiana benthamiana	NBEN_103	Niben101Scf04627g00001.1		S	Niben101Scf04627	68280-69125	ATGTTGTCCGCTTTCCCGGCCATTATTTTGTCCTCCGATGGAACTTTTTCTAACCAATTTTCTTCCTTCAATGATAATTTCATTCCATGGGATTACGTCGATTCGACTTTTACGTTCCCTGATCAAGTGGTTGAATCGATTTTTTCACCAAATCAAACCCCAATCCGTGAACCGGTTATATCTCATTCTGGTTCAGGTTCGGATAATTCTAAACCCGATTCTCCTAATTCTAGTTTCCGTTCAGACGAGCCGAACATGAATAATCATAGCCCATGGGAATGTCTCGAATCGGGTTTTATATTACCAGATCAAGGGGTAGAATCGGTTTTTCAACCGAAGCGATCCCCAACCCCTGAACCGGTCCTCTCAAACTCTGGTTCAGATCCTGATAAATATATA…	MLSAFPAIILSSDGTFSNQFSSFNDNFIPWDYVDSTFTFPDQVVESIFSPNQTPIREPVISHSGSGSDNSKPDSPNSSFRSDEPNMNNHSPWECLESGFILPDQGVESVFQPKRSPTPEPVLSNSGSDPDKYITDSPNSSSGSDELTMNNDGPNSGSDILVINERKRKRMISNRESARRSRMRKQKHLDTLRNQANRLKVANRDLTNRIHLVTSHCQLVQRNNQMLRTESVFLQQRLENIRAILLARQLQQQSYNSSAWPCNNYVQQRPQIIINQPIINHH*
401	Nicotiana benthamiana	NBEN_104	Niben101Scf04629g02009.1		S	Niben101Scf04629	244674-245052	ATGGCAGCGAATGTAAAAAAAAAGGCAGTGGTTGCTTCTGATGCAGACCAGCAGTATGCAAAGTTTGACGAAAGGATAAAGGAAGATGGTGTGTTCTGGTCGTTTGGCGGACAGCAGCACTGGTGGAGATTGCTGCGTCACTGGTCCGTTGCTGGAGGTGAGGGTCGTTTGGACAGGGCTCGGAGGTCACGAATGAGGAAGCAACAGCGATTGAGGGAGTTTATGAGCGAAACAACACAGCTACATAAACAGAACAGTATCTTCCGTGAGAGGATTGATTCTGTCGAGAGAAATCGTAAGAGCACAATTATACGTGATTAA	MAANVKKKAVVASDADQQYAKFDERIKEDGVFWSFGGQQHWWRLLRHWSVAGGEGRLDRARRSRMRKQQRLREFMSETTQLHKQNSIFRERIDSVERNRKSTIIRD*
402	Nicotiana benthamiana	NBEN_105	Niben101Scf04632g09012.1		A	Niben101Scf04632	917343-924767	ATGGGATCTCAGGGTGGTGGTGGTGGTACTAGTATGGGTGCAACTCAAGCACAAGACCCAAAGCCAAATGCTTTGGCTAGGCAAGGATCATTATATGGTCTTACACTTGATGAGGTTCAGAATCAATTGGGGGATTTGGGGAAACCACTAAGCAGTATGAATCTTGATGAGCTTCTTAAGACTGTATGGACTGTTGAGGCTAGTCAAGGAATGGGGGGAACGGATTACGGGGCGCTGCAGCATAGCCAGGTTGCTTCGGGGAGTTCTTTGCATCGACAGTCGAGCATTACACTAACCGGTGATCTATGTAAGAAGACTGTTGATCAGGTTTGGCAGGATATTCAGCAGGGGCAGAAAAGGGATAATAGTGATAGGAAAACTCAGGAGCGGCAGCGTACT…	MGSQGGGGGTSMGATQAQDPKPNALARQGSLYGLTLDEVQNQLGDLGKPLSSMNLDELLKTVWTVEASQGMGGTDYGALQHSQVASGSSLHRQSSITLTGDLCKKTVDQVWQDIQQGQKRDNSDRKTQERQRTLGEMTLEDFLVKAGVVAEPTPGKRSSSGSGLGGDSMALPQQQAQWSHYAMPQIPPQQPQQQNMLPVFMPGHPVQQPLAVVANPIMDAAYPESQMTMSPTALLGTLSDTQTLGRKRVAPEDVVEKTVERRQKRMIKNRESAARSRARKQAYTHELENKVSRLEEENERLKRQKEIEKVLPSVPPPEPKYQLRRTSSAPF*
403	Nicotiana benthamiana	NBEN_106	Niben101Scf04665g02022.1		D	Niben101Scf04665	306228-317240	ATGGGATCTTATTCAACAGAAGAAGAAAATAATCTTTTTATTGGAGTTCATTTCATGGCTTCCTCTAACAAAAACAATGACGACCTTTTACTAAATAATAATAGTCAAATTTCTTTTGGAAGCCAACAGCAACAGCAGTTTTTTCATAGTCCTCAGCAGCAACATGATCAGCACCAACTTCAAAATAATAGTAATCAGATTTCTTTTGGTCTGTTACAACAGCAGTCATCTTCTTCATCGAATCCTGGAAATTTCATAAACAAAGATAATAATGGAGCTTATGATTTGGGAGAACTGGATCAAGCACTGTTTCTTTATCTTGATGGACAAGAGCCTTCTTCAATCCAAGATCAAAGACAGAATTCTGGGATGAGGCCACCAACTCTCAATATCTTTCCA…	MGSYSTEEENNLFIGVHFMASSNKNNDDLLLNNNSQISFGSQQQQQFFHSPQQQHDQHQLQNNSNQISFGLLQQQSSSSSNPGNFINKDNNGAYDLGELDQALFLYLDGQEPSSIQDQRQNSGMRPPTLNIFPSQPMHIEPSSTKVNNGLVSQAASGSKKSSQPSMAKSDVVPSASGPEPPKTAKQQQFFHSPQQQHDQHQLQNNSNQISFGLLQQQSSSSSNPGNFINKDNNGAYDLGELDQALFLYLDGQEPSSIQDQRQNSGMRPPTLNIFPSQPMHIEPASTKVNNGLVSQATSGSKKSSQPSMAKTDVVPSASGPEPPKTAKREGIRKGPTSSSEQDAPKTPDPKTLRRLAQNREAARKSRLRKKAYVQQLESSRIRLAQLEQEIQRARSQGFY…
404	Nicotiana benthamiana	NBEN_107	Niben101Scf04684g01013.1		E	Niben101Scf04684	96737-100384	ATGGAAAGTTCAAATGAATCATCAAGCTTGAAAAACTTCTCCTTTTCAAACAAGCAGTTGATCATGGACTCCACAGAGGGATCAGGATCGGGATCGAGTCACCATCATCGGTGTAACTCGGAGAGCTTTCTTATAGAGGAGCAACCTTCTTGGCTTGATGACCTTTTGAATGAACCGGCAGAAACAGTAATTGTACACAAAGGTCATCGCCGTTCAGCTAGCGACACTTTTGCGTACGTAGGAGCAGCTGCAGAGAGGTTAAACACAAGGGAAATTAACAACAATGTAAATGTAGGAGGATCTTCAATCAACTACGTCAGTTACAAAGATCATTTAACTTCATCAGTTACCTATGACACAAAGCCAACTTCTGCTAAGGCTGCTCTGGAATTGAATGAG…	MESSNESSSLKNFSFSNKQLIMDSTEGSGSGSSHHHRCNSESFLIEEQPSWLDDLLNEPAETVIVHKGHRRSASDTFAYVGAAAERLNTREINNNVNVGGSSINYVSYKDHLTSSVTYDTKPTSAKAALELNEKHNREVINTQNKEGSSERSNNTQAKHALSKADAKRAKQQSAHRSRVRKLQHIAELERTIQALQAEGSELSAELEFLDQQNIILSMENRALRKRLDSLSQEQLIKHLEQEMLERELTRLQTLYQMQRQQMQQQQQHQQPQQQNHSKHRRNKSRDLEVQFANLSIKNNEASSSRVQTTGSVRM*
405	Nicotiana benthamiana	NBEN_108	Niben101Scf04754g03024.1			Niben101Scf04754	291145-292024	ATGGCTGACGAGAATGTTGCCAACGGGGAGGTTTTTGATGATGCAGTGGAGATCGAAGGAGAGGTGGATTCTGAGGGTGCATTGAAGACCTCTCCTTTGACGCAGAAAATAGCTGCCTTAGAGCAAGAGAACAATCAACTTTTTCACGAGAACCAAGTCGTCAAAGAAAGGCTTGAGAAATTGAAGCACTCGATAGAGGAAATAGAGAACGAGAAGGTTGAGTTACAGAAGAAGGCAGATAAGTTTGAGTCGGAGAATAAGGCTTTAGGATCAGTAGCTGCCCGAGCAGCAGAGCTCGAGGGCGAACACTCGCGACTGCAGCACGATCTCATAACTGCGATGAACGATCTAGAAGAATCGAATTCGGAGTTGTCGAAACTGAAGCTGGCTCTGGGGGTC…	MADENVANGEVFDDAVEIEGEVDSEGALKTSPLTQKIAALEQENNQLFHENQVVKERLEKLKHSIEEIENEKVELQKKADKFESENKALGSVAARAAELEGEHSRLQHDLITAMNDLEESNSELSKLKLALGVEKLEASGNDQRAEAEVKEKEIRGLKKKIEDLEAAVMNNEAWKKEKEALHMVKDELEKRITEMMGKVAELEKKLEEKETLINERDVDSNVNGIPGAENKAGSSVVKADLTVVAVSSVAAVAIVGILCYLRYARKP*
406	Nicotiana benthamiana	NBEN_109	Niben101Scf04819g03016.1		S	Niben101Scf04819	405006-405443	ATGGCTTCCACTCAGCAAGCAGTGAGTTCTGCTTCTGATGCAGACCAGCAGTATGCAAAGTTTGACGAAAGGAAAAGGAAGAGAATGGAATCCAATCGTGAGTCTGCTCGTAGGTCACGGATGAGGAAGCAACAGCGATTGGGGGAGTTGATGAGCGAAACAACGCAGCTACATAAACAGAACAGTATCTGCCGTGAGAGGATTGATTCTGTCGAGAGAAATTATCGTGCCATGGATGCAGAGAACAATGTACTGAGGGCTCAGATTGCTGAATTGACTGAACGTTTGAATTCATTGAACTCGCTCACTCAATTTTGGGCTGACGCTACTGGATTCCCTGTGGACCTCTCTGAAATTCCCGACACTTTGCTTGAACCATGGCAGCTGCCTTGCCCTATT…	MASTQQAVSSASDADQQYAKFDERKRKRMESNRESARRSRMRKQQRLGELMSETTQLHKQNSICRERIDSVERNYRAMDAENNVLRAQIAELTERLNSLNSLTQFWADATGFPVDLSEIPDTLLEPWQLPCPIQPIDASSDMLLF*
407	Nicotiana benthamiana	NBEN_110	NBEN_bZIP.Niben101Scf04843.1		S	Niben101Scf04843	31762-33162	ATGGTGTGTTCTGGTCGTTTGGCGGACAGCAGCACTGGTGGAGATTGCTGCGTCACTGGTCCGTTGCTGGAGGTTGACGACGGGCTGGTGATGTTGCTGCTCGACGGAGGAAGACGCAGCAGCGTTTCAGGTGAGGGTCGTTTGGACAGGGCTCGGAGGTCACGAATGAGGAAGCAACAGCGATTGAGGGAGTTTATGAGCGAAACAACACAGCTACATAAACAGAACAGTATCTTCCGTGAGAGGATTGATTCTGTCGAGAGAAATCGTAAGAGCACAATTATACTGTAG	MVCSGRLADSSTGGDCCVTGPLLEVDDGLVMLLLDGGRRSSVSGEGRLDRARRSRMRKQQRLREFMSETTQLHKQNSIFRERIDSVERNRKSTIIL*
408	Nicotiana benthamiana	NBEN_111	Niben101Scf04922g00002.1		J	Niben101Scf04922	34020-39327	ATGAATATCAATACCAAACAGGTAGAAGAATCACCGCGGCCGTGGACGGCGGAGAAAGGGAGGGTTTCTGGTGGTGGAGATCGTGAAGATGAAGTGGTGGGATGTGAGCTGGAAGCAGCACAAGCGTTGGCTTGTTTGGCTGGTCGCTCTCAGGAGCAACCAATAGCTATGCCCGATGAGCAGGAATCTGAACTCAAAACAAGCCCTCGTCACGCTCTAAATTATCCACTAGTTGTCAGCAGAAGATCGAGGCAGAATTTGACTGAGGAGGAGAGGGAAGAAAAAAGGCTGTGTCGTGTATTAGCAAACAGAGAATCTGCTAGGCAGACAATTCGCCGGAGACAGGCCATGTATGAAGAGTTGACAAGAAAAGCAGCTGATCTTGCATTGGAGAACGAA…	MNINTKQVEESPRPWTAEKGRVSGGGDREDEVVGCELEAAQALACLAGRSQEQPIAMPDEQESELKTSPRHALNYPLVVSRRSRQNLTEEEREEKRLCRVLANRESARQTIRRRQAMYEELTRKAADLALENENLKKTKELAAKEYEPLKNENTNLRIQETDGGSKSKPVEISTTITAATPNPTTNPIPAPLFNQSLITPFFWPSIVQPFSAFLLQCGSQHISDIASVLPSPTSGELNSINRQESSNPGNPLFVLPVPCLIPFHPQSSSPFLPWSSTLTDKHHAETSSVHQCSTSYLNTGNNQAAIAAERDAPESVKAKRRDFLHEAELRFPPEGGASEGSRQPSSSHIQLGTSEHINASDIGAISCTVGHLEDTSEKISQECITSSSKNPVDPQAAAE…
409	Nicotiana benthamiana	NBEN_112	NBEN_bZIP.Niben101Scf05002.1		A	Niben101Scf05002	394331-403127	ATGCTGCTTCTGCGGCTCCCACTTAAAATGCTCAATTTTGCTTCTGCGGACATTACATCGCAGAAGCGATCCCGCTTCCGCGGAAATTTCCGCCGCTTATGCGGTCATTGCCCCCTTCCGCTTTTGCGATTTGCCAAGCCGCTTTTGCGGTGCCGCTTCTACGGTCCCAAGCCACAAAAGCGGAAACAACAGAAGCAGCAACATAATTTCCTTGCCAACTCCCAAAACCAACCCGTCGATTCTAGAGCTGAAGTTTTCTATTTTGGGGGAGGAAGATTGACCTTTGAAATTCCATATTCTAAGTATGAGATGGCTTCATTAATTTATCCTGGATCAGCAGTGTTTGATTTTCTTAAACGCTTAGAGTTAGCAAATTTGGATTCTGATCAAATCAATACA…	MLLLRLPLKMLNFASADITSQKRSRFRGNFRRLCGHCPLPLLRFAKPLLRCRFYGPKPQKRKQQKQQHNFLANSQNQPVDSRAEVFYFGGGRLTFEIPYSKYEMASLIYPGSAVFDFLKRLELANLDSDQINTTNKENIAKSIIASDVSEPINNSRKRPSGVSLEATVTEKRQRRTIKNRESAAQSRARKQKSRANWIQLEDNNTKYFHTYMKSRQARNKVSCILTENQLKLTDPRQIQQQFTQFFQELLGTAAAQLLGIDITVARDGPCLTLHHQQQLLAPVTEKKIHQIVQNLPQDKTTEPNVFETWLRLLEL*
410	Nicotiana benthamiana	NBEN_113	Niben101Scf05082g04017.1		S	Niben101Scf05082	501736-502146	ATGGCTTCATCTTCTTCAGGAGATTTGATGAATGAAAGAAAAAGGAAGAGAATGGTATCAAACAGGGAATCAGCAAGAAGATCAAGAATGAGAAAACAGAAGCATTTGCATGATCTGATATCACAAGCAGAACAATTGAAGGAAGAGAACATCAAGATCCTAACAAGTATTAATGCGACAACACAAAACTATGCTACTGTGGTGGCAGAGAACAATATTTTAAGAGCTCAGATGATGGAACTTAACCAAAGGTTGCATTCTCTCGATGACATCCTCAGCTACATCAACACTAATGGAACAACTTTATTTGAGGATCACAACTGTCCTGAAACTTTCGTGAACAATCCGTGGAACTTGATGTACCAAAATCAGCCAATCATGGCATCTGCTCATATGATT…	MASSSSGDLMNERKRKRMVSNRESARRSRMRKQKHLHDLISQAEQLKEENIKILTSINATTQNYATVVAENNILRAQMMELNQRLHSLDDILSYINTNGTTLFEDHNCPETFVNNPWNLMYQNQPIMASAHMIYHY*
411	Nicotiana benthamiana	NBEN_114	Niben101Scf05201g06021.1		D	Niben101Scf05201	609935-630217	ATGGCTGATATCAGTCCTAGTACATCAACAGATGCCGATACAGAAGATAAGAACAGGTTCCTAAATTCTCAACAACTGGGTGCGGTAGCTTCTGATGGAAGTGACAGGACAAGAGATCAGAAGACACTTCGTAGACTTGCCCAAAATCGTGAAGCGGCTCGAAAAAGTCGTCTAAGGAAAAAGGCATATGTTCAACAGTTAGAGAGCAGCCGGATGAAGCTGACACAACTAGAGCAGGAACTTCAACGAGCTCGACAACAGGGCATATTTATTTCAGGTTCAGGGGATCAATCACAGTCGATGAGCGGAAATGGAGCTTTGGCATTTGATGTAGAATATGCCCGATGGTTGGAGGAGCAGAACCGACGAATTAATGAGCTAAGGGGAGCTGTAAATTCT…	MADISPSTSTDADTEDKNRFLNSQQLGAVASDGSDRTRDQKTLRRLAQNREAARKSRLRKKAYVQQLESSRMKLTQLEQELQRARQQGIFISGSGDQSQSMSGNGALAFDVEYARWLEEQNRRINELRGAVNSHAGDGELRIIVDGILAHYDDIFRIKGDAAKSDVFHILSGMWKTPAERCFLWLGGFRLSELLKSSQQAEDALSQGMEALQQSLAETLAGSLGPSSSSGNVANYMGQMAMAMGKLGTLEGFIRQADNLRQQTLQQMHRILTTRQSARALLAISDYFSRLRALSSLWLARPRE*
412	Nicotiana benthamiana	NBEN_115	NBEN_bZIP.Niben101Scf05222.1		S	Niben101Scf05222	382126-400514	ATGGTGTGTTCTGGTCGTTTGGCGGACAGCAGCACTGGTGGAGATTGCTGCGTCACTGGTCCGTTGCTGGAGGTTGACGACGGGCTGGTGATGTTGCTGCTCGACGGAGGAAGACGCAGCAGCGTTTCAGGTGAGGGTCGTTTGGACAGGGCTCGGAGGTCACGAATGAGGAAGCAACAGCGATTGAGGGAGTTTATGAGCGAAACAACACAGCTACATAAACAGAACAGTATCTTCCGTGAGAGGATTGATTCTGTCGAGAGAAATCGTAAGAGCACAATTATACGTCGTGATTTCGAATCCTCTGAGCAAGCAGTTTTCAGCATCATACCAGATGAATACAACTGCATCTCAACTCTTCAATCTGCTAAGGATATCTGGGAAGCTCTTCAAACTGTC…	MVCSGRLADSSTGGDCCVTGPLLEVDDGLVMLLLDGGRRSSVSGEGRLDRARRSRMRKQQRLREFMSETTQLHKQNSIFRERIDSVERNRKSTIIRRDFESSEQAVFSIIPDEYNCISTLQSAKDIWEALQTVHEVSTQDSVTQNIAQNPLPAHDDADFVGRMHGDMEYENPFGNMLTEINNIEVGEGPSNLDVQPSS*
413	Nicotiana benthamiana	NBEN_116	Niben101Scf05252g02009.1		I	Niben101Scf05252	197199-204768	ATGCAAGAACCGTCACATCCAAACTCCGTTAAGTTACCAAATCAACCGCTGTCGTCATTTTCAGCTGCTGCATTTCGTCCGTCTCACCACCGGCGAGCTCACTCGGAGGTGAACTTCCGGTTGCCGGAGGATTTAGATCTGGCATCTGACCCATTCGATGCGCCGGCGGGAAGTTTCGAGGAGATCGGATCGGAGGATGATTTTTTCTCTACGTACATGGACATTGAGAAGCTCGGCTCCGGCGGTGGACCTAACTCCGGCAGCGATGCAGCAGCTGGTGGTCTCGAAAAGGCCGGTGGTAGTGGAGGGAGTAGCCGAGTGGGAGCTGAGAGTAGTGACGGAGAGAAAAGCATGATGTTGAAGCCACGTCATAGGCACAGTAATTCAGTGGATAGCTCA…	MQEPSHPNSVKLPNQPLSSFSAAAFRPSHHRRAHSEVNFRLPEDLDLASDPFDAPAGSFEEIGSEDDFFSTYMDIEKLGSGGGPNSGSDAAAGGLEKAGGSGGSSRVGAESSDGEKSMMLKPRHRHSNSVDSSSSLLLSETIEAKKAMAPDKLAELWTIDPKRAKRILANRQSAARSKERKARYISELESKVQTLQTEATTLSAQLTLFQRDTTGLTNENTELKLRLQAMEQQAQLRDALNEALKQEVERLKMATGQISASSDAYNLGMQQISYNRPAFFPHQPQSGPSEPPNIQMPQFHTLQGSMSNPRHPLLAGHHAQALGDAMQQDPLGCFQGLHINSRGSHLVKTEAPSISASESSTLNEALKQEVERLKIATGQISASSDSYNSGMQQISYNRP…
414	Nicotiana benthamiana	NBEN_117	NBEN_bZIP.Niben101Scf05306.1		S	Niben101Scf05306	264448-268283	ATGGTGTGTTCTGGTCGTTTGGCGGACAGCAGCACTGGTGGAGATTGCTGCGTCACTGGTCCGTTGCTGGAGGTTGACGACGGGCTGGTGATGTTGCTGCTCGACGGAGGAAGACGCAGCAGCGTTTCAGGTGAGGGTCGTTTGGACAGGGCTCGGAGGTCACGAATGAGGAAGCAACAGCGATTGAGGGAGTTTATGAGCGAAACAACACAGCTACATAAACAGAACAGTATCTTCCGTGAGAGGATTGATTCTGTCGAGAGAAATCGTAAGAGCACAATTATACGCAACATTCAACCGGGCCATATGGAGAGAACATCTTCTGGCAACTGTACAAAGAGACACCTCCAACTGGTGTAG	MVCSGRLADSSTGGDCCVTGPLLEVDDGLVMLLLDGGRRSSVSGEGRLDRARRSRMRKQQRLREFMSETTQLHKQNSIFRERIDSVERNRKSTIIRNIQPGHMERTSSGNCTKRHLQLV*
415	Nicotiana benthamiana	NBEN_118	NBEN_bZIP.Niben101Scf05310.1		E	Niben101Scf05310	472222-481919	ATGGCAAATTCCAAGGGGGCATCTAGCATGAGAAATATGGTGTACAATGGAAAGAGCTCTTTACTGCCTCCTAAAAGTCCGTTTCCTAGCATTTCCCCCTCGTATGTTGATTATGTCCCTAGTTCTGCTGTCACTCAAAGAGGCATTTCAAAATCTAGAGATGGTTCACACCATCAGCGCACTTCTTCTGAAAGCTGTCTTATAGAGGAGCAACCATCTTGGTTGGATGATCTTCTTAACGAGCCGGAAACTCCAGTACGCAGAGGTGGCCATCGACGTTCATCTAGTGACTCCTTCACATATCATGATGCTGCTAACATTGCATACTTAGATTACATAGCTCAAGATGATGGCAAATTCAGAAATTTAACTCCTGTCCCTTCCTGGGGATCCCAAGAC…	MANSKGASSMRNMVYNGKSSLLPPKSPFPSISPSYVDYVPSSAVTQRGISKSRDGSHHQRTSSESCLIEEQPSWLDDLLNEPETPVRRGGHRRSSSDSFTYHDAANIAYLDYIAQDDGKFRNLTPVPSWGSQDFDYYKDARHATFHVDQNFSNRQKNRARDASSNAIQHHHGRPPFMENVKTRSLGASCPPQEGERPKSAGSDKQDLVESVPPNPVGSGDKKDSSHRKSSASESDTKRAKQQFAQRSRVRKLQYISELERNVQALQAEGSEMSAELEFLNQQNLILSMENKALKQRLENLAQEQLIKYLEHEVLEKERGRLRALYQQQQLPQSQQQQESSFSHRRTTSRDLDQQFADLSLKHKEGSGQLHM*
416	Nicotiana benthamiana	NBEN_119	NBEN_bZIP.Niben101Scf05404.1		S	Niben101Scf05404	979400-987430	ATGGTGTGTTCTGGTCGTTTGGCGGACAGCAGCACTGGTGGAGATTGCTGCGTCACTGGTCCGTTGCTGGAGGTTGACGACGGGCTGGTGATGTTGCTGCTCGACGGAGGAAGACGCAGCAGCGTTTCAGGTGAGGGTCGTTTGGACAGGGCTCGGAGGTCACGAATGAGGAAGCAACAGCGATTGAGGGAGTTTATGAGCGAAACAACACAGCTACATAAACAGAACAGTATCTTCCGTGAGAGGATTGATTCTGTCGAGAGAAATCGTAAGAGCACAATTATACGGTGCAACATACGCGTCAATCTTGCAATTGCGCTCAGATCACGTTCGTCAGGCAGAACACTAGGCGACTAG	MVCSGRLADSSTGGDCCVTGPLLEVDDGLVMLLLDGGRRSSVSGEGRLDRARRSRMRKQQRLREFMSETTQLHKQNSIFRERIDSVERNRKSTIIRCNIRVNLAIALRSRSSGRTLGD*
417	Nicotiana benthamiana	NBEN_120	Niben101Scf05430g00004.1		A	Niben101Scf05430	4421-12513	ATGGCGTCAATGAAGCTGATGACTTCATCGGCGTCGCGAAATTCCGATCGAAGGAAATCGTCTGCGTCGTCGTCGTCTTCGTCGTCAACGATGCCGCAAGATTTGCAGTTTTCAAACAACGGGAGTAATAATAGTAGTAGTAATTTGGAAGCGACTTCTGTGACGCCTGACGTAATTTTCCGGAATGTGTACGGAGATAGTCATAATAATGCTTTACTGAACGCGGAGATTGCGTTACTCGATGCTGCCGGAGCTATAACGCCGATTAGTGATTCCGAGACACCGACGGCCACGGCGGTGACGGCTAGTGAGGTGCCACCGGCTAGGAGGACGGTGGATGATGTGTGGAGGGAAATTGTGGAAGGGAAGAGGGAAAAGCAAAGGGCGGCAGTAGTTGCG…	MASMKLMTSSASRNSDRRKSSASSSSSSSTMPQDLQFSNNGSNNSSSNLEATSVTPDVIFRNVYGDSHNNALLNAEIALLDAAGAITPISDSETPTATAVTASEVPPARRTVDDVWREIVEGKREKQRAAVVAGCKEEMMTLEDFLVKAGAVEEEDTAPVQRPEVKVELGTERLSGGIFAFDNSTPHMPTPQQSVPGFGRGKRKAVLEPLDKVAMQRQRRMIKNRESAARSRERKQAYQVELESMAIKLEGENELLLKEKEVRTRAHYKQLIEKVIPVVDKRKPPRVLRRVCSMQW*
418	Nicotiana benthamiana	NBEN_121	Niben101Scf05491g02004.1		D	Niben101Scf05491	262584-268463	ATGGCAAGTCAAGGAATTGGAGAGACTGGTTTAACAAACTCAGGATCATCAAATTACCATAATATGCCTTATGCAGTTTTTAGGGGGTTAACTCCTGCTACCACTAGCTTCATATATCATTCTACTCCCAATTTGTTTCTAGCTTGTGTTAACAAAAATATGTGCTATAGTATTCAAGACGGATCTTTTGGTTTTGGAGAGCTAGAAGAAGCTTTTGCACTACAAGGATTTAAGATCAATAATGATGAAGCTAAAGAATCTTTATATGCAGCAGCTTCCACAGGCAAGCCTGCTGCAACTCTGAATATATTCCCTTCTTGGCCTATGAGATTCCAAGAGACCCCAAGAGAAAATTCAAAATCAAGAGAAGAAGATATCAGTACTGATTCAGGTTCACTT…	MASQGIGETGLTNSGSSNYHNMPYAVFRGLTPATTSFIYHSTPNLFLACVNKNMCYSIQDGSFGFGELEEAFALQGFKINNDEAKESLYAAASTGKPAATLNIFPSWPMRFQETPRENSKSREEDISTDSGSLSSRAQAHLEPESPISTKASSEQNQLQITQQQQQQLHQEMSSHNNPRTGNLQTESAPKPNNMEKRKGAGSTSERMADPKTLRRLAQNREAAKKSRLRKKAYVQQLETSRIRLSQLEQELQRARTQGIFLGGGTAAGANISSGAALFDMEYSRWLDDDQRHMSELRTALQAHLSDGDLRLIVDGYIAHYDEIFSLKGVAAKSDVFHLITGMWTTPAERCFLWMGGFRPSELIKASVACNFARMSSLLPMWWFGSIVPSPVMLIGQLDP…
419	Nicotiana benthamiana	NBEN_122	Niben101Scf05519g00002.1		A	Niben101Scf05519	26882-35658	ATGAACGATCAAGAGAGAAAGCCAACTCTTGGTGAGACAACTTTGGAGGACTACTTGGTGAAAGCTGGGCTTTTCAGTGCTGATGCTTCTTTAGGACATACAATGTCATTGGATAATCCTACGGCAGTGCAAAATTTTGTGCCTCCAATAGGCTTGTCACCATCTCCTTCGATTGATGCGCTGTCAGATACACCGTTCTCTGGTCGGAAGAGGGATGCTACGGACATCGATAAGACCCTTGATAGGAGACTAAGGAGAAAGATCAAGAATAGAGAGTCAGCTGCACGCTCTCGAGCCAGAAAACAGGCTTACCAGAATGAGCTCGTGACCAAGGTCTCACTTCTGGAAGAGGAGAACATGAAGCTTAAGAAAGAGAAGATTGGAGTTCGCTGA	MNDQERKPTLGETTLEDYLVKAGLFSADASLGHTMSLDNPTAVQNFVPPIGLSPSPSIDALSDTPFSGRKRDATDIDKTLDRRLRRKIKNRESAARSRARKQAYQNELVTKVSLLEEENMKLKKEKIGVR*
420	Nicotiana benthamiana	NBEN_123	Niben101Scf05584g02016.1		G	Niben101Scf05584	269059-272841	ATGGGAAATAGTGAGGAAGGAAAATCTTGTAAACCTGAGAAATCATCTTCGACCGCAGCATTAAATGTTCAGGCATATTATGGTCATCGAGTAGCTGTATCTCCTTTTGTCAATTCTCCTGTTGCACCTGGTCATGCTCCTCATCCTTATATGTGGGGACCGCTACAGCCTATGATTCCACCTTATGGTGCACCATATGCAGGAATCTATGCGCATGGTGGTGTTTATGCGCACCCTGGAGTTCCTATCGTATCTCGTCCTCAGGCTCATGGAATGACATCATCTCCTGCTGACAGCCAAACCATGGATGCTGCTTCTTTGAGTATGGACACTTCTGTTAAGTCTTTGGAGAATACTGATCAACGCACGAGTAAGTTAAAAGGTTCTAATGGGCTTGGA…	MGNSEEGKSCKPEKSSSTAALNVQAYYGHRVAVSPFVNSPVAPGHAPHPYMWGPLQPMIPPYGAPYAGIYAHGGVYAHPGVPIVSRPQAHGMTSSPADSQTMDAASLSMDTSVKSLENTDQRTSKLKGSNGLGVSIGNCSVDNGDGTDNGPSQSGHTEGSSDGSNIHTAEVGENSKKRSREITSNDSGDAKTRTRSSPQPREVIGATKKETSIAVNPANIAEKVVGTVFSPTMTTTLELRNPVGTLVKASPTNVSRIGPAVPAEAWLQNEREIKREKRKQSNRESARRSRLRKQAEAEDLAIRVQSLTSENLGLKSEINKFTENSEKLKLENAALMERLKNKRRGKAEEVTLGKIDDKRLQPVSTADLLARVNNSCPLDRTIDDSEIRENNTSGAKLHQ…
421	Nicotiana benthamiana	NBEN_124	Niben101Scf05690g01008.1		S	Niben101Scf05690	191868-192380	ATGGCTTCATCAAGTGGAACATCGTCAGGGTCATCATTGTTTCTACAAAACTCAGGCTCAGAAGAAGATCTTCAGCAATTAATGGATCAAAGGAAGAGAAAAAGAATGATATCAAACAGAGAGTCAGCTCGAAGATCAAGGATGAGAAAACAGAAACATTTGGATGATTTAATGGCTCAAGTTGCAACACTAAGAAAAGAAAATAACCAGATTTTGACAAGCATGAATGTTACCACACAACATTATCTTAATGTTGAGGCTGAAAATTCAATCTTGAGAGCTCAATTAGCTGAATTAAATCACAGGCTTGAGTCACTCAATGAAATTATTGCTTTCTTGGATGCCAACAACAATTGTAATGGTTTTGCCAATATGGATCATAATCAAGAAGAGCCTTAT…	MASSSGTSSGSSLFLQNSGSEEDLQQLMDQRKRKRMISNRESARRSRMRKQKHLDDLMAQVATLRKENNQILTSMNVTTQHYLNVEAENSILRAQLAELNHRLESLNEIIAFLDANNNCNGFANMDHNQEEPYSFNFAQNEPMIDGFNTTNSWNYLCANQPIMTADVLQY*
422	Nicotiana benthamiana	NBEN_125	Niben101Scf05823g02011.1		S	Niben101Scf05823	318686-318930	ATGGTTTCAAATAGGGAATCTGCAAGGCGATCTAGGATGAAGAAACAAAATCTTGTGCAAGAATTGACAAAGGAAGTTAGCAAATTACAAGCTGCCAACAGAATCAATGTGGCTAAAACTAAAGAGATTATAGAGAGGTTGACATTTTGCACTGCTCAATATTTAAGCAAATATCTCCGCATTTTCTAA	MVSNRESARRSRMKKQNLVQELTKEVSKLQAANRINVAKTKEIIERLTFCTAQYLSKYLRIF*
423	Nicotiana benthamiana	NBEN_126	Niben101Scf05845g03015.1		C	Niben101Scf05845	292449-301053	ATGCTATCCAATAGAGAATCAGCTAGACGCTCCAGAAGAAGAAAGCAGGCCCATCTGACAGAATTAGAGACACAGGTCTCTCAAGTAAGAGTAGAAAACTCCTCTTTACTGAAACGCTTTACTGACATAAGCCAGAAATACAATGAAGCCGCAGTTGATAATAGAGTATTGAAAGCAGATGTTGAGACACTGAGAGCAAAGGTGAAGATGGCTGAAGAAACTGTTAAAAGAGTTACTGGGTTAAACCCGCTATTCCAAGCTATGTGTGAGATATCCACAATGATGATGCCATCTTTCACTGGCAGTCCTTTCGACTCATCTGCGGATGCTGCTGTTCCTGAACAAGATGACCCCAGACATCACTACTATCAAGCATTGGAAAATAGTCATATGCCCAAT…	MLSNRESARRSRRRKQAHLTELETQVSQVRVENSSLLKRFTDISQKYNEAAVDNRVLKADVETLRAKVKMAEETVKRVTGLNPLFQAMCEISTMMMPSFTGSPFDSSADAAVPEQDDPRHHYYQALENSHMPNHTPGMQNGMIDIPSMENAHQNSAAEAIGGNKIGRTSSMQRVASLEHLQKRMRGEASTCGTQCRKEE*
424	Nicotiana benthamiana	NBEN_127	Niben101Scf05919g01007.1		St	Niben101Scf05919	174373-185359	ATGGCCTTGTGTTTGCATAACAAGAATCAGATAATGGATAACAGCAAGTATGTGAGGTACACACCAGAACAGGTGGAAGCTTTGGAGAGAGTGTATGCAGAATGTCCAAAGCCTACTTCTTTGAGGAGGCAACAGCTCATTAGAGAGTGTCCCATTCTCTCTAATATTGAACCTAAACAGATCAAAGTCTGGTTTCAGAACCGAAGATGCCGTGAAAAACAGAGGAAAGAAGCATCTCGTCTCACCACTGTTAACAGGAAGCTGAGTGCTATGAACAAGCTGTTGATGGAAGAAAATGACCGGTTGCAGAAGCAAGTGTCACAGCTTGTGTATGAGAATGGCTACATGAAACAACAAATCAATACTGTTAGCAGCACGACCACAGATACAAGCTGTGAA…	MALCLHNKNQIMDNSKYVRYTPEQVEALERVYAECPKPTSLRRQQLIRECPILSNIEPKQIKVWFQNRRCREKQRKEASRLTTVNRKLSAMNKLLMEENDRLQKQVSQLVYENGYMKQQINTVSSTTTDTSCESVVVNGQQQRKNPTPQHPERDANNPAGLLAIAEETLAEFLGKATGTAVDWVPMIGMKPGPDSIGIVAVSRNCSGVAARACGLVSLEPTKVAEILKDRPSWYRDCRCLNILSVIPTGNGGTIELIYLQTYAPTTLASARDFWTLRYTTSLEDGSLVICERSLTTATGGPTGPPATSFVRAEMLPSGYLIRPCEGGGSMIHIVDHLDLDAWSVPEVLRPLYESSKILAQKTTVAALRHIRQIAQETSGEIQYTGGRQPAVLRALSQRL…
425	Nicotiana benthamiana	NBEN_128	Niben101Scf06081g01013.1		A	Niben101Scf06081	124694-127784	ATGAATTTAGATGACCTACTCAATAATTTTTGGGACAATGAAGGAAATCAAGTTACTCCTAATTCAAATCAAGATATTCCTACAAAAGAAGGACAACATTCAAGGTATGATTTCCTCAACCACTCAAAGTGTGCTGAAAATGGCAAAGAAAATGCTGATTCTTCTCCAACACATCATCAAATCTTTGAACAAGTTAATGGTGGTTTCATTTATGGCCACCAGAATTCTGATCAAATCAATACTACAAATAAAGAAAATATTGAAAATTCCAACAGTGCATCAGATGTTAGTGAACCAATTTACAATAGCAGAAGAAGATCATCAAGTGTTTCATTAGAAGCAACAGTAATGGAAAATAGACAACGTCGAATGATTAAGAATAGAGAGTCTGCTGCACGA…	MNLDDLLNNFWDNEGNQVTPNSNQDIPTKEGQHSRYDFLNHSKCAENGKENADSSPTHHQIFEQVNGGFIYGHQNSDQINTTNKENIENSNSASDVSEPIYNSRRRSSSVSLEATVMENRQRRMIKNRESAARSRARKQLSYNLFIRLCDVLGGEKETANKSSMDC*
426	Nicotiana benthamiana	NBEN_129	Niben101Scf06106g01007.1		F	Niben101Scf06106	155592-163829	ATGCACAATGGGGTGCTCGAATTCTCTAACCAAGAAATGGTGTCAAGTTCTAATTTTGGTGAAACGCCAGAATGTAGTTCCAAGGAAAGGCTTTTCAATGAAATTCTCTCGGACATGCACGCTTGTATTCATACCCACACTTGCAATCCACCCGGTCCTGATAACTCACACACACACACTTGTTACCATGTTCACACCAAGGTTGTTCCTCACCCAACCGAGGATAAGATCCTCAGTGACGATACTTCAGAGAATAAGTTAGGAAAGGGACGCGCTTTGAGTAATAAGGAAGCAGTTCGTAAGTACCGTGAAAAAAATAAGGCTCGGGTTGCATCATTAGAGGATGAGGTAGTCAGGTTGAGGGCTATAAATCAGCAACTGTTAAAGAGGTTACAGGGT…	MHNGVLEFSNQEMVSSSNFGETPECSSKERLFNEILSDMHACIHTHTCNPPGPDNSHTHTCYHVHTKVVPHPTEDKILSDDTSENKLGKGRALSNKEAVRKYREKNKARVASLEDEVVRLRAINQQLLKRLQGQSVLEAEITRLKCFLVDIRGRIEGEIGSFPYQKPMESADVYQNLVNPILPGAYVMNPCNLQCDDQVYCLQPGSEELNGQGLNSCGFETSQCLGNQGLNTPTASPSCGNKRKGAKRAAMASWS*
427	Nicotiana benthamiana	NBEN_130	Niben101Scf06112g02013.1		G	Niben101Scf06112	313604-325286	ATGGGGGCTGGGGAAGAAAGCACCCCTGCAAAGCCTTCAAAAGCTACTTCAACTCAGGAGACACAAGCTACACCTTCATATCCCGATTGGTCAAGCTCTATGCAGGCTTATTATGGTGCTGGAGCTGCACCTCCCTTCTTTTCCCCAACTGTTGCTAGTCCTACTCCCCATCCATACATGTGGGGAGGCCAGCATCCGCTTATGCCTCCTTATGGTGCTCCAGTCCCATATCCAGCTTTATATCCTCCTGCTGGAGTTTATGCTCATCCTAATATGCCCATGACTCCAAACCCACTGCAGGCACATCCAGAATCAGATAGTAAGGCACCTGATCCTAAGGACCAGAGTACAAGCAAAAAATTAAAGGGATATACAGGTGGCAAGGCAGGAGAAAGTGGG…	MGAGEESTPAKPSKATSTQETQATPSYPDWSSSMQAYYGAGAAPPFFSPTVASPTPHPYMWGGQHPLMPPYGAPVPYPALYPPAGVYAHPNMPMTPNPLQAHPESDSKAPDPKDQSTSKKLKGYTGGKAGESGKVTSGSGNDGATRSAESGSEGSSDANDENDNHEFSANKSRNFDLMLANGAGSQNNPATGNPVAMPATNLNIGMDLWNASSGGPGMIKMRSNQSGVAPAPGIGREWIQDERELKRQKRKQSNRESARRSRLRKQAECEELQQRVETLSNENHALREEMRKLSEECEKLTSENNSIKEELMRLCGPEAVSKLESNASATHLQSNVEEANS*
428	Nicotiana benthamiana	NBEN_131	Niben101Scf06369g01020.1		S	Niben101Scf06369	137594-138382	ATGGTGTGTTCTGGTCGTTTGGCGGACAGCAGCACTGGTGGAGATTGCTGCGTCACTGGTCCGTTGCTGGAGGTTGACGACGGGCTGGTGATGTTGCTGCTCGACGGAGGAAGACGCAGCAGCGTTTCAGGTGAGGGTCGTTTGGACAGGGCTCGGAGGTCACGAATGAGGAAGCAACAGCGATTGAGGGAGTTTATGAGCGAAACAACACAGCTACATAAACAGAACAGTATCTTCCGTGAGAGGATTGATTCTGTCGAGAGAAATCGTAAGAGCACAAATATACCGGCCCAGCCCTGGAATAAGGCGCCAAGGGCGGCGGGGGCAGAGGCGGTTGTAGGCCGTGGTATCCGCCGTGCGGGGGCAGAGCAAACCTGGGGTGATTGA	MVCSGRLADSSTGGDCCVTGPLLEVDDGLVMLLLDGGRRSSVSGEGRLDRARRSRMRKQQRLREFMSETTQLHKQNSIFRERIDSVERNRKSTNIPAQPWNKAPRAAGAEAVVGRGIRRAGAEQTWGD*
429	Nicotiana benthamiana	NBEN_132	NBEN_bZIP.Niben101Scf06376.1		A	Niben101Scf06376	519535-519957	ATGGAAGAAGTTTGGAAAGACATTAATCTTTCTTCACTTCAAGACCATACTACTTCTTACTCTAGAGATCATGACCATCATCAAACTGCTAATTTTGGTGGTATGATTTTACAAGATTTCTTAGCTCGGCCTTTTGCTACTGACCCTCCACCACCACCAGCAGCCTCTCCTGTTGCGGCTACTACTATGCTGAATTTGAACTCAGTTCCAGAGCTTCATTTCTTTAGTCAAAACTCAATGTTGCACCCACCGACACCTATTTCTCGACTCCCATTTGAGGGCTTGGCTTATTCAGCTACTAATGGAAGAAAAAGGATTCCTGAAATAGAGAATAATTCTGCAGGGGACAGGAGAAATAAAAGGATGATCAAGAACCGTGAGTCTGCTGCTAGATCAAGG…	MEEVWKDINLSSLQDHTTSYSRDHDHHQTANFGGMILQDFLARPFATDPPPPPAASPVAATTMLNLNSVPELHFFSQNSMLHPPTPISRLPFEGLAYSATNGRKRIPEIENNSAGDRRNKRMIKNRESAARSRARKQESS*
430	Nicotiana benthamiana	NBEN_133	Niben101Scf06665g01018.1		G	Niben101Scf06665	142488-144953	ATGATGTCTGCTACAGCTGACACGTCTCAAAATGGAAATGCTGCACATGGTTCCCAGAATGGAGGGACTGGCGGCGCTCCTCATTCAATGGTTAACCAAACTATGGCAATCGCCCCGATATCAGCTTCTGCAGCGGGAGGTATTCCTGGACCCACAACCAACTTGAATATTGGTATGGATTACTGGGGTGCTGCCACCACACCATCTATTCCTGCAATACACGGAAATGTACCTTCTGCTTCAGTTGCTGGAGGGTTGGTTGCTGCTGGATCACGAGATAGCGCCCAATCACATATGTGGATTCAGGACGAAAGGGAGCTTAAGCGGCAGAGAAGAAAGCAGTCCAACAGGGAATCTGCTCGTCGATCTAGGTTACGAAAGCAGGTACAAATAATCCTT…	MMSATADTSQNGNAAHGSQNGGTGGAPHSMVNQTMAIAPISASAAGGIPGPTTNLNIGMDYWGAATTPSIPAIHGNVPSASVAGGLVAAGSRDSAQSHMWIQDERELKRQRRKQSNRESARRSRLRKQVQIILQFFPFSIIINPDSTSPFVSQAECDELAQRAEVLREENSSLRAEVNRIRSEYEQLLAQNASLKERLGEVPGEDDPRTSRDDQLLGKKAQHSSQKESGQGS*
431	Nicotiana benthamiana	NBEN_134	Niben101Scf06782g02003.1		I	Niben101Scf06782	199118-199609	ATGTTATCAGCTAGGCCTTCCGATAATAACCTTAAGCCGCTGGCCCACTACCGTAGTCTCTCTTTGGATGCTGATTTTTTCGATGGAATGGACTTTAGTGCTGCGGCGGCGGAGAATAAGATGATAGGTGGTGGCCCGCGTCATAGGCATAGCAATTCCATGGATGGCTCTTTTGATTTTGAGTTTGAATCGCTTTTTGTGAAGAAGGCTATGGCTCCTGATAAGCTTGCTGAGCTTTCCCTGATTGATCCCAAGAGAGCCAAAAGGATTCTAGCAAACAGACAATCTGCTGCACGTTCTAAGGAGCGAAAAACTCGTTATAGGAAAGTGCAGACTCTGCAGACTGAAGCCACCACTCTAACTGCACAGATCACAGTTCTTCAGAGAGACACTTCTCGA…	MLSARPSDNNLKPLAHYRSLSLDADFFDGMDFSAAAAENKMIGGGPRHRHSNSMDGSFDFEFESLFVKKAMAPDKLAELSLIDPKRAKRILANRQSAARSKERKTRYRKVQTLQTEATTLTAQITVLQRDTSRIAAENKELKFRLQALEQQAHLRDALNETLR*
432	Nicotiana benthamiana	NBEN_135	Niben101Scf07109g05015.1		F	Niben101Scf07109	564080-568253	ATGAGGTATGGAATCTGTGAAGAGGGTCTCTTAATTGCTAGTGCTTTGCTGCAGATTGTCACCTTACTGGTTACTACTTTTGGGATTGCTATGATGGCTGACGGAGAGCTGGAATTTTCTAACCAAGAAATGTTATCAAGTTCGAATTTTGGTGAATTTAGTAGTTCCATGGACAGCTTTTTCAATGAGATTCTCAAGGATACACATGCCTGCACTCACGCCCACACTTGCAACCCGCCTGGCCCTGATAATTCTCATACGCACACTTGTTACCATGTTCACACCAAATTCATGCCTCCCTCGGAGGAAGACGAGGATAAGAACCCCAGTGATGATACTGCAGAGTCTTCAGAGAAGAAAGGAAAGAAACGACCCGTGGGTAATAAGGAAGCCGTTCGC…	MRYGICEEGLLIASALLQIVTLLVTTFGIAMMADGELEFSNQEMLSSSNFGEFSSSMDSFFNEILKDTHACTHAHTCNPPGPDNSHTHTCYHVHTKFMPPSEEDEDKNPSDDTAESSEKKGKKRPVGNKEAVRKYREKKKARAASLEDEVIRLRAINQQLFKRLQGQAVLEAEVARLKCLLVDIRGRIEGEIGSFPYQKPMKSGNVYQNVVNPNIPGSYVLNSCNLQCDDQVYCLHPGAEVKSSDGTVLNGQGFNNCEFETLQCLGNQTSGMEEVSCPMDNGTPTPTANTSGRSKRTGESMSFPLKXLVLWIMAHLLLLPTLLVEAREKEAHAHQQQADELCRRSIFCSWEQVRFVMCSLLGFLPSLSTLLSSIIISIRLLSWWPSSYLSTFM*
433	Nicotiana benthamiana	NBEN_136	Niben101Scf07278g00007.1		A	Niben101Scf07278	31146-37870	ATGGGATCTTACTTGAACTTCAAGAATTTTGCTGACTCGCCGCAGCCAGAGAGTAACGGTGGGAATTTAATGTGTAATGGTAATTTCCCTTTGGCTAGGCAATCTTCCATATATTCCTTGACCTTTGATGAGCTTCAAACTACATTTAGTGGACTTGGAAAAGATTTTGGATCAATGAATATGGAGGACCTCTTGAAAAGTATTTGGACAGCTGAAGAAACTCAAGCTACAGCGTCTACTACTGGTGGAGTAGATGAGAGTATAGCTGCAGGAAATCTACAAAGACAAGGTTCTTTGACATTACCTAGGACACTTAGTCAAAAAACTGTTGATGAAGTATGGAGAGATTTTCAGAAAGAAACTGTTAGTGCCAAAGAGGGAAGTGACACTGGGAATTTA…	MGSYLNFKNFADSPQPESNGGNLMCNGNFPLARQSSIYSLTFDELQTTFSGLGKDFGSMNMEDLLKSIWTAEETQATASTTGGVDESIAAGNLQRQGSLTLPRTLSQKTVDEVWRDFQKETVSAKEGSDTGNLNFGQRQSALGEMTLEEFLVKAGVVREDMQCTNSNGITFDNGSSQQSNNNGLNIAFQQPAQNNGLLINQIAANNMLNVVGATPSQQQPQHQQPLFPKQTTVAFASPMQLSNNGLLDSPRTRAPVVGMSGSSVNTNMAQGGVRGMTGFHNGVSPAKGGSPGNDFAARSHTDTSSLSPSPYAFNEGGRGRRSGSSLEKVVERRRRRMIKNRESAARSRARKQAYTLELEAEVAKLKEINEELRKKQAEIIEKQKNQLLEKRNMPCGYKF…
434	Nicotiana benthamiana	NBEN_137	Niben101Scf07343g00002.1		S	Niben101Scf07343	15463-16305	ATGTTGTCCACTTTCCCGGTCATTATTCTGTCCTCCGATGGAACTTTTTCTAACCAATTTCCTTCTTTTTTCGATAGTTTCATTCCATGGGATTATGTCGAATCGACTTTTACATTCCCTGAACAAGTGGTAGAATCGATTTTTTCACCAAATCAAACCCCAACACTTGAACCGGTTATTTCTCATTCTGGTTCAGGTTCGGATAATTCTAAACCCGAGTCTCCTAATTCTAGTTTCTGTTCAGATGAGCCGAACATGAATAATCATAGCCCATGGGAATGCCTCGAATCGGCTTTTATATTACCAGAACAAAGGGTAGAATCGGTATTTTCACCGAACCTATCCCCAACTGCTGAACCGGTTCCTTCAAACTGTGGTTCAGGTCCTGATAAATATATA…	MLSTFPVIILSSDGTFSNQFPSFFDSFIPWDYVESTFTFPEQVVESIFSPNQTPTLEPVISHSGSGSDNSKPESPNSSFCSDEPNMNNHSPWECLESAFILPEQRVESVFSPNLSPTAEPVPSNCGSGPDKYITVSPNSSSGSDELNMNNDGPNSGSDILFINERKRKRMISNRESARRSRMRKQKHLENLRNQANRLKVESRDLKNRIHLVTSHCQLVQTKNEMLQTESVLLQQRLENIREILLARQLQQLYNSSAWPCNNYVEQRPQIIFNQPIINHH*
435	Nicotiana benthamiana	NBEN_138	Niben101Scf07465g01009.1		I	Niben101Scf07465	106360-120440	ATGGCTCAGTCTAATTCTAAGCCACCTACGAGTCACAGTTTTGGTGTTGGAGCTTCTCATGTAAGGTCTTTATCTCAACCAAGCATTTTCTTGAATAATTGTTTGCCCCCTTTGAGTCCTTTACCTCCTAGCGAGTTGTCGATTGTTTTGGCTAATACTAGTTTGAAGGACACATCCATGGAGGAAGTAGATGTGAATTGTCAAGTTCCAAAAGCCGTGTCTAACTTTGTAAGGGAAAGTGCGTTGTGGGGTAGTGACGGTCTTCCTCCTCGGAAAGGTCATCGTCGATCTAATAGTGATGTTCCGTTAGGATTCTCGGATATGATTCAGTCTTCGCCTCAGTTGATGCCCATAAGTGGACAGAGAATTTCTGGGAGAGCAGTGAATCTTGGGGATAGC…	MAQSNSKPPTSHSFGVGASHVRSLSQPSIFLNNCLPPLSPLPPSELSIVLANTSLKDTSMEEVDVNCQVPKAVSNFVRESALWGSDGLPPRKGHRRSNSDVPLGFSDMIQSSPQLMPISGQRISGRAVNLGDSSGREKTIDLQKQPMGLSSNGRIDVEGIGERKSRGEVTDELLFSYMNLENIEALNSSGTEDRDKGSMVSCTKVSGNESSNNEAESLLKGSGVSSQLTSLREGIQRSADADIAPTTRHLRSLSMDSAIGGFHYGDESPKLPASLINHSGQLSPSNSGNESSSQHNFDFGNAEFCEAEVKKIMADERLAEIAVSDPKRAKRILANRQSAARSKERKLRYISELEYKVQKLQTEATTLSTQVTILQKDFTELSSLNSELKFRVQAMEQQT…
436	Nicotiana benthamiana	NBEN_139	Niben101Scf07465g03010.1		D	Niben101Scf07465	407779-409622	ATGTGGAAGGTGATATATGAACATATGGAATCACAGGTACAACGACGTTTAGCACAAAATTGTGAAGCTGCCCGTAAAAGCCATATGCGGAAAAAGGCATATGTTCAGCAGTTGGAGACAAGCCGGTTGAAGCTGGCGCAACTTGAGTTAGAGCTCGAGAGAGCTAGACAGCAGGGACTATACATGTTAGGTTCAAATGCCAATATGGGGATACTCGAAACAATTAATCCAGCTGCATTTGAGATGGAATACAGCCATTGGGTTGAAGAGCAACAGAAAAAGAATGCAGAATTGCAGAGTATTTTGCAGTTTCCTGTAAGCGCAATGGAGCTTCAGTTGCCGGTAGAAAATGTCTTAAGCCACTATTTCAATCTATTCCGAATGAAAGCTGACACAGCT…	MWKVIYEHMESQVQRRLAQNCEAARKSHMRKKAYVQQLETSRLKLAQLELELERARQQGLYMLGSNANMGILETINPAAFEMEYSHWVEEQQKKNAELQSILQFPVSAMELQLPVENVLSHYFNLFRMKADTAMDDVFYLMFGMWRTSVERIFLRIGGFKPSDLINVVLGAFLLLFFLKIYYNNLLLMSFS*
437	Nicotiana benthamiana	NBEN_140	NBEN_bZIP.Niben101Scf07549.1		A	Niben101Scf07549	245656-250436	ATGGGGAGTAATTTTAATTTCAAGAACTTTGGAAATGAGCCACCTGGGGAGGGTGGAAGTGGTGTTGGTGGAAAGCAGCCTGCGATATTTCAGTTGCCGCGACAGCCATCTATCTATTCGTTAACGTTCGATGAGTTTTTGAGCACGACGGGAGGGAATGGAAAGGATTTTGGTTCAATGAATATGGATGAGTTGCTAAAGAATATATGGAATGCCGAGGAAAGTCAAACAATGGGTGGGTCTGGGATTAATGGGCAAGAAGTAGGTAGTGTTCAAGGTGGGAATTTACAGAGACAAGGCTCTTTGACTTTACCTAGAACACTGAGTCATAAGACTGTTGATGAAGTTTGGAGGGATATGTCAAAGGAGTATGGTAGTAGAAAAGATGGAAATAGTGTT…	MGSNFNFKNFGNEPPGEGGSGVGGKQPAIFQLPRQPSIYSLTFDEFLSTTGGNGKDFGSMNMDELLKNIWNAEESQTMGGSGINGQEVGSVQGGNLQRQGSLTLPRTLSHKTVDEVWRDMSKEYGSRKDGNSVGVPTNLPQRQQTLGEITLEEFLVRAGVVREDAQLVAKSNNVGGVFADLAYAGNTGVGFGYQQTNRNTGETGIQAANLPLNVNGVRSTQQLRAQQLQQQQPQPQQQQPQQQPLLPKQPALAYAAPMAIPNNGQLGSPGMRGGMVGFSDPALNSNFVQGAALTGGGMGMVGLGAGAVTVATASPAVSSDGLGKSSGDTPSVSPVPYVFNGGIRGRKYSTVEKVVERRQRRMIKNRESAARSRARKQAYTMELEAEVAKLKEENEELQK…
438	Nicotiana benthamiana	NBEN_141	Niben101Scf07614g00005.1		F	Niben101Scf07614	70962-74808	ATGGATGATGGTGAGCTGGAATTTTCTAATCAAGAAATGTTGTCAAGTTCAAATTTTGGTGAATTTCCAGACAGTGGTTCAATGGACAGTTTCTTCAATGAAATTCTCAAGGATACACATGCTTGCACTCATACGCACACCTGCAATCCACCTGGCCCTGATAACACCCACACACATACATGTTATCATGTCCATACCAAAATTGTCCCTCCCCTGAGTGAGGATAAGACAGCCAGTGATGATACTGCTGAATCCGCAGAGGGGAAAAGAAAGAAACGGCCTTTGGGTAATAGAGAAGCGGTTCGTAAGTACCGCGAGAAGAAGAAGGCTCGAGCTGCTTCGTTAGAAGATGAGGTTGTCAGATTAAGGGCTATAAATCAGCAACTCATGAAAAGGCTG…	MDDGELEFSNQEMLSSSNFGEFPDSGSMDSFFNEILKDTHACTHTHTCNPPGPDNTHTHTCYHVHTKIVPPLSEDKTASDDTAESAEGKRKKRPLGNREAVRKYREKKKARAASLEDEVVRLRAINQQLMKRLQGQAVLEAEIARLKCLLVDIRGRIEGEIGSFPYQKPMKSGNVYQNLVNPNLPGAYVMNPCNLQCDDRVYCLHPGSEGKNLDDTALDGQGFDNCEFETLQCLGNQTSELKEGSGCALGNVAPTGNPSGGSKRKASDDTAESAEGKRKKRPLGNREAVRKYREKKKARAASLEDEVVRLRAINQQLMKRLQGQAVLEAEIARLKCLLVDIRGRIEGEIGSFPYQKPMKSGNVYQNLVNPNLPGAYVMNPCNLQCDDRVYCLHPGSEGK…
439	Nicotiana benthamiana	NBEN_142	Niben101Scf07778g03025.1		A	Niben101Scf07778	492127-494401	ATGGGCGTACCAGAATCGGAGATGGTGTCACAAGGTGAGGTTGAATCACCATTGCAACAAGATCAAAACCAGCACAAGAACCATCAGTTCCCGTCCCTTGGTAGACAAGCATCGATCTATTCGCTCACTCTCGATGAATTCCAACACACACTATGTGAAAGTGGCAAGAATTTCGGGTCGATGAATATGGATGAATTCCTTAACAGCATTTGGACTGCTGAAGAAAACCAAGCCCACACGCACGCGCATGCCCATGCTGCGCATGGGCACGGACACGGGCACGCGCATTCTCATGCTCATAGCCAGGCACCAAGTGCAGGGGAAGCCACTAGCACGCCACATTTTGCAATAGGACAGAGCAATGTTTCAATGGAGAAAGCTATTGCCAAGCAGCCAAGC…	MGVPESEMVSQGEVESPLQQDQNQHKNHQFPSLGRQASIYSLTLDEFQHTLCESGKNFGSMNMDEFLNSIWTAEENQAHTHAHAHAAHGHGHGHAHSHAHSQAPSAGEATSTPHFAIGQSNVSMEKAIAKQPSLPRQGSLTLPEPLCRKTVDEVWSEIHKSQKEQHQNNGSSVPDTGNSAQRQVTFGEMTLEDFLVKAGVVREQENATAPVPPQQQSYMMYQNSNNPTMANMARPVIGLGGVSGSVGVGIPSYPPLPQTGGVEAPIYPVSMKRGAGFPQQPTAVYGGRMGNGGGVGYGQVQGVAGMGSPLSPVSSDGLCVNQVDSGVQYGLEMGMRGGRKRIIDGPVEKVVERRQRRMIKNRESAARSRARKQAYTVELEAELNQLKEENAHLKQALAE…
440	Nicotiana benthamiana	NBEN_143	Niben101Scf07883g02005.1		E	Niben101Scf07883	280319-283674	ATGGCACATTTACCTCCTAGAGTACCAAATATGACACCAAATTGGCCTGATTTTTCACATCATCAAAAAATAGACACCAACACAGCCGGTCACAACCCGTCATGGGTAGACGAATTCCTCGACTTCTCGTCGACGAAACGAGGTTCACATCGGAGATCCATTAGCGATTCAATAGCTTTTCTTGAAGCACCAATGGTTGAAGAATGCCGAAGGCTATCAACTCCAGGAAAGACAACTGGTTCAGAATTTGAAAGATTTGACGATGAACAACTCATGTCAATGTTTAACGATGACATTGCCAATCCTTCTTCGCCTTCGGACAATAACAGCATTAATGAAGAAAAGAAGATGAGTACGATAATTTCCACTGACGACCAGGAAATGCAACAGCAGCAGCAG…	MAHLPPRVPNMTPNWPDFSHHQKIDTNTAGHNPSWVDEFLDFSSTKRGSHRRSISDSIAFLEAPMVEECRRLSTPGKTTGSEFERFDDEQLMSMFNDDIANPSSPSDNNSINEEKKMSTIISTDDQEMQQQQQELKSEPEEVESLCKSDEQTASDQQATADNNSSEKIVDPKRIKRILANRQSAQRSRVRKLQYISELERSVTTLQAEVSVLSPRVAFLDHQRLVLNVDNSVLKQRIAALAQDKIFKDAHQEALKREIERLRQIYYQQNLKKMEDGTTTPQSKFQPAAVDANASEQKEQLVN*
441	Nicotiana benthamiana	NBEN_144	Niben101Scf07926g04007.1		D	Niben101Scf07926	416533-423093	ATGAATTCAACATATACTCAATTCGTTGCCTCTAAAAGGATGGGCATATGTGATCCAATCCATCAAATTGGAATGTGGGGAGATTTCAAAGGCAGCAGCTACCCAGATACATCGGCCACCTTGATTCTTGAAGTCGAGAATTGTCTACAGAACGAGATGCCTATTATGGAGAAAAGAGTACATAATGAGATAGAGGAACTTTCACATGGAACAGTTGGTACGTCTAACAGATATGAACCAGAAGCACGTAAACCTATTGATAAGGCGCTTAGACGCCTCGCACAAAACCGTGAAGCTGCTCGTAAAAGTCGTTTACGGAAGAAGGCCTATGTTCAGCAGTTGGAAAATAGTAAACTGAAGCTGCTTCAGTTGGAACAAGAACTAGAACGTACCAGACAA…	MNSTYTQFVASKRMGICDPIHQIGMWGDFKGSSYPDTSATLILEVENCLQNEMPIMEKRVHNEIEELSHGTVGTSNRYEPEARKPIDKALRRLAQNREAARKSRLRKKAYVQQLENSKLKLLQLEQELERTRQQGRYAGGGLDESQIGYTGTANSGIAAFEMEYGHWVEEQDRQTDELRSALNSQVGEIELHLLVEGCLNHYFDLFRMKATAAHADVLFLMTGTWKTSAERFFLWIAGFRPSELLKVLTPNVEPLTEQQLREVRNLTQSCQQAEDALSQGMVKLHQILAEAVAAGTLGEGIILPQMAATIEKLEALVRFVNQADHLRQETLLQMSCILTPQQSAQGLLALGEYFKRLRALSSLWTSRTSEPA*
442	Nicotiana benthamiana	NBEN_145	Niben101Scf07984g02007.1		S	Niben101Scf07984	196767-197060	ATGGTGTGTTCTGGTCGTTTGGCGGACAGCAGCACTGGTGGAGATTGCTGCGTCACTGGTCCGTTGCTGGAGGTTGACGACGGGCTGGTGATGTTGCTGCTCGACGGAGGAAGACGCAGCAGCGTTTCAGGTGAGGGTCGTTTGGACAGGGCTCGGAGGTCACGAATGAGGAAGCAACAGCGATTGAGGGAGTTTATGAGCGAAACAACACAGCTACATAAACAGAACAGTATCTTCCGTGAGAGGATTGATTCTGTCGAGAGAAATCGTAAGAGCACAATTATACGTGATTAA	MVCSGRLADSSTGGDCCVTGPLLEVDDGLVMLLLDGGRRSSVSGEGRLDRARRSRMRKQQRLREFMSETTQLHKQNSIFRERIDSVERNRKSTIIRD*
443	Nicotiana benthamiana	NBEN_146	Niben101Scf08078g02023.1		I	Niben101Scf08078	341270-345831	ATGGCTCAGCCTAATTCTAAGCCACCCATCAGCCATAATTTTGGTGGGGGAGCTTCTCATACATGGTCTTTATCTCAACCGAGTATTTTCTCAAACAATGGCCTTCCCCCATTGAGCCCGTTCCCTCATAGTGAGTCATCTATGGCATCAGCCAACTCTAGTTTGAAGGATACATCGATGGAGGAAGTTGATGTTAGTTCTCGAGGTCCACCATTTGTCTCCTCTTTAACAAGGGAAATCACATTTCGATGTAGTGATAGTCTTCCTCCTAAGAAAGAGCATCGTCGCTCTAATAGTGATGTTCCGTTGGGATTCTCAGCTATGATTCAGTCTTCACTGCAGTTGATGCCCATAAGTGGCCAGGGAGTTCTGGGTGGAGCGACGCTGCTCGGAGATCCT…	MAQPNSKPPISHNFGGGASHTWSLSQPSIFSNNGLPPLSPFPHSESSMASANSSLKDTSMEEVDVSSRGPPFVSSLTREITFRCSDSLPPKKEHRRSNSDVPLGFSAMIQSSLQLMPISGQGVLGGATLLGDPLRPKSEGEVVDKLYINLENMEALNSSITEDKAKDSIASRTKLSSGNSSNNEAETVKGTSIKRSADADITPTTRHFRSLSMDSAIGSFQYGEESPKLTTSLVNCPGQLSSSKSRNENSGKINFDLGNGEFSEAEMRKIMADERLAEIVVSDPKRAKRILANRQSAARSKERKLRYISELEHKVQTFQTEATTLSKQVTILQKDFTELTSLNNELRFRLQALEQQAQLRDGMEITFRCSDSLPPKKEHRRSNSDVPLGFSAMIQSSLQ…
444	Nicotiana benthamiana	NBEN_147	Niben101Scf08127g07002.1		S	Niben101Scf08127	728840-729418	ATGATTTCATCAGAGGGTGCAGCAATCCACTACTTTGCTCCAGAAAACAACCCCTCATCACTTCCCATAGATTTCGGCTTCATGCACAAAAACTTATCACCATTCCAATACAACACATTCTTAACAAACAACAATATACAAAATTATCAGACCTCTTTTCCTGTTAAAGACTTCAGCCAACAGCCCTCATGCATCAGCAGTAACTCGACCTCAGACGAATCGGAGGAACAACAAATCAGAGTCATCGATGAACGAAAACAAAGGAGAATGGTATCTAATAGGGAATCAGCTAGAAGATCAAGGATGAGGAAGCAGAGACACCTTGATGAGCTATGGTCTCAAGTTCTTCGCCTTCAAACAGAGAATCAAAATCTGATGAATAAACTAAACCAAGTCACA…	MISSEGAAIHYFAPENNPSSLPIDFGFMHKNLSPFQYNTFLTNNNIQNYQTSFPVKDFSQQPSCISSNSTSDESEEQQIRVIDERKQRRMVSNRESARRSRMRKQRHLDELWSQVLRLQTENQNLMNKLNQVTESHERVFQENIQLKEEASDLRRMITDIQIDSPFHAFSDFEEVTCNTAHLKAESSNQSTT*
445	Nicotiana benthamiana	NBEN_148	Niben101Scf08203g00022.1		A	Niben101Scf08203	96660-100689	ATGGTAACTCATGGGATGGGATCTCAGGGTGGAGTTGGTGGTGGAAAAGAAGCAAAGCCGAATGCTTTGGCTAGGCAAGGATCACTCTATAGCCTCACTCTTGATGAAGTTCAGAATCAATTAAGGAATTTCGGGAAACCACTAAACAGCATGCATCTTGATGAGCTTGTTAAAACTGTATGGACTATTGAGGCTAGTCAAGAATTTGGGGGAAATGTTTATGGGGAAGCGCAGCACGGTACTAATTCCCTGCATCGACAATCATCGGGCATCACAATGTCCAGAGATCTCAGCAAGAAGACTGTTGATGAGGTGTGGCAGGATATTCAACAGGGGCAGAAAAGGGATAGTAGCATTGATAAGACAAGTCAGGAGAGACGACTTACTTTTGGTGAGATA…	MVTHGMGSQGGVGGGKEAKPNALARQGSLYSLTLDEVQNQLRNFGKPLNSMHLDELVKTVWTIEASQEFGGNVYGEAQHGTNSLHRQSSGITMSRDLSKKTVDEVWQDIQQGQKRDSSIDKTSQERRLTFGEITLEDFLVKAGVIAESTQGRRISGLVLGVDSMSLAQQAQWPHYQIPTMHQAPEQQLQQQQNIVPVFMPGHPVQQPLPVVANPIVDPETQMTMSPSHLMGTLSDTQTSGRKRVAPEDVIEKSVERRQKRMIKNRESAARSRARKQAYTHELESKVSRLEEENERLKRQKEMEKILPSVPPPEPKYQLRRTSSGPI*
446	Nicotiana benthamiana	NBEN_149	Niben101Scf08334g01011.1		E	Niben101Scf08334	97333-105904	ATGGCAAATTCCAAGGGGGCATCTAGCATGAGAAATATGGTGTACAATGGAAAGAGCTCTTTACTGCCTCCTAAAAGTCCGTTTCCTAGCATTTCCCCCTCGTATGTTGATTATGTCCCTAGTTCTGCTGTCACCCAAAAAGGCATTTCAAAATCTAGAGATGGTTCACACCATCAGCGCACTTCTTCTGAAAGCTGTCTTATAGAGGAGCAACCATCTTGGTTGGATGATCTTCTTAACGAGCCGGAAACTCCAGTACGCAGAGGTGGCCATCGACGTTCATCTAGTGACTCCTTCACATATCATGATGCTGCTAACATTGCAAACTTAGATTACATAACTCAAGATGATAACAAATTCAGAAATTTAACTCCTGTCCCTTCCTGGGGATCCCAAGAT…	MANSKGASSMRNMVYNGKSSLLPPKSPFPSISPSYVDYVPSSAVTQKGISKSRDGSHHQRTSSESCLIEEQPSWLDDLLNEPETPVRRGGHRRSSSDSFTYHDAANIANLDYITQDDNKFRNLTPVPSWGSQDFDYNKDARHATFHVDQNFSNRQKNRARDGSPNAIQHHRGRPPFRENVKTHSLVAACPPQEGERPTSAGSDAGSGEKKNSSHSKSSASESDTKRAKQQFAQRSRVRKLQYISELEQNVQALQAEGSEVSAELEFLNQQSLILSIENKALKQRLENLAQEQLIKYCKFLLYLSYFIVVSAISSA*
447	Nicotiana benthamiana	NBEN_150	Niben101Scf08711g00019.1		S	Niben101Scf08711	44886-45119	ATGTCAGCAAATTGGGATATTAAAAACACAAATTTGCGAAAAGGAAAGGAAAATAATGGTTTCAATAGAGAATATGCAAGGCGATTTAGGATGAAGAAACAAAAACTTGTGCAAGCATTGACAAAGGAAGTCAACAAATTACAAGCTGCCAACAAAACAATTGTAACTAAAATTGAAGAGACTACAAAGAGTGCTCAGAATAATATATTGAGGGCATAG	MSANWDIKNTNLRKGKENNGFNREYARRFRMKKQKLVQALTKEVNKLQAANKTIVTKIEETTKSAQNNILRA*
448	Nicotiana benthamiana	NBEN_151	Niben101Scf08716g00005.1		D	Niben101Scf08716	2191-16017	ATGGCTTATATCAGTCCTAGTACATCAACAGACGCCGATACGGAAGATAAGAACAGGTTCCTAAATTCTCAACAACTGGGTGCGGTAGCTTCTGATGGAAGTGACAGGACTAGAGATCAGAAGACACTTCGTAGACTTGCCCAAAATCGTGAAGCAGCTCGAAAAAGTCGTCTAAGGAAAAAGGCATATGTTCAACAGTTAGAGAGCAGCCGGATGAAGCTGACACAACTAGAGCAGGAACTTCAACGAGCTCGACAACAGGGCATATTTATTTCAGGCTCAGGAGATCAATCACAGTCAATGAGCGGAAATGGAGCTTTGGCATTTGATGTAGAATATGCCCGATGGTTGGAGGAACAGAACCGACGAATTAATGAGCTAAGGGGAGCTGTAAATTCT…	MAYISPSTSTDADTEDKNRFLNSQQLGAVASDGSDRTRDQKTLRRLAQNREAARKSRLRKKAYVQQLESSRMKLTQLEQELQRARQQGIFISGSGDQSQSMSGNGALAFDVEYARWLEEQNRRINELRGAVNSHAGDGELRIIVDGILAHYDDIFRIKGDAAKSDVFHILSGMWKTPAERCFLWLGGFRSSELLKLLINQLEPLTEQQLLAINNLQQSSQQAEDALSQGMEALQQSLAETLAGSLGPSSSSGNVANYMGQMAMAMGKLGTLEGFIRQADNLRQQTLQQMHRILTTRQSARALLAISDYFSRLRALSSLWLARPRE*
449	Nicotiana benthamiana	NBEN_152	Niben101Scf08814g00011.1		S	Niben101Scf08814	48272-48751	ATGGCTACATCTAGTGGAAATTCAACTGGATCTACTCAGATTTTGAACTCAGGTTCTGAAGAAGATTTGCAGGTTTCAATGTTAGATGAAAGGAAAAGAAAGAGAATGCAATCAAATCGTGAATCAGCAAGAAGATCAAGGATGAGAAAACAGAAACATCTTGATGATTTAATTGGTCAAGTTGCGCAACTGAAAAAGGAAAACAGCAACATCCTTAGCAACATCAACTTGACAAGTCAACAGTACGCTAATGTTGAAGCAGAGAACTCTGTTTTAAGAGCTCAGATGATGGAACTTAGTCAAAGGTTGCAATCTCTTAATGAAATCCTCAGTTACATCAATTCCAACAACAACAACAATAATAACGGAGTTTTTGAAACTCATCATCATTATCAGGAG…	MATSSGNSTGSTQILNSGSEEDLQVSMLDERKRKRMQSNRESARRSRMRKQKHLDDLIGQVAQLKKENSNILSNINLTSQQYANVEAENSVLRAQMMELSQRLQSLNEILSYINSNNNNNNNGVFETHHHYQEDMMNNPWNLMYVNQPIMASADMLYQY*
450	Nicotiana benthamiana	NBEN_153	Niben101Scf08973g00012.1		D	Niben101Scf08973	20789-27231	ATGAATTCTTCAACATACACCCATTTCGTCGCCTCAAGAAGGATGGGTATATGCGATCCGATCCATCAACTTGGAATGTGGGATGATTTCAATGGTAGTTTCCCAAGTACGTCGGCAACCATGATTTTAGAAGTTGATAAATGCCTAGAGGACCAGATACCAATTATGGAGAAAAGACTAGAAAACGAGACAGAAGACACTTCACATGGAACAGTAGGGACTTCTAACAGATATGAACCAGAAACAAGTAAACCCGTCGAGAAGGTACTTAGACGTCTTGCACAAAACCGTGAGGCTGCTCGTAAAAGCCGTTTGCGGAAGAAGGCCTATGTTCAGCAGTTAGAAAATAGTAAATTGAAGCTGATTCAATTGGAACAAGAATTAGAACGCGCCAGAAAA…	MNSSTYTHFVASRRMGICDPIHQLGMWDDFNGSFPSTSATMILEVDKCLEDQIPIMEKRLENETEDTSHGTVGTSNRYEPETSKPVEKVLRRLAQNREAARKSRLRKKAYVQQLENSKLKLIQLEQELERARKQGEKNLINQTNILQQGLYAGGGLDASQLSYSGTASSGTAAFDMEYGHWVEEQTRQTNELRSALLSQIGEAELRIIVDGYLNHYFDLFRMKATAAKADVLYIMSGMWKTSAERFFMWIGGFRPSELLKVLTPHLELLTEQQLREVCNLTQSCQQAEDALSQGMVKLHQILAEAVAAGRLGEGNYTLPQMGPAIEKLEALVRFVNQADHLRQETLQQMSRILNTYQAAQGLLALGEYFERLRVLSSQWATRLREPT*
451	Nicotiana benthamiana	NBEN_154	Niben101Scf09071g00004.1		S	Niben101Scf09071	59252-59545	ATGGTGTGTTCTGGTCGTTTGGCGGACAGCAGCACTGGTGGAGATTGCTGCGTCACTGGTCCGTTGCTGGAGGTTGACGACGGGCTGGTGATGTTGCTGCTCGACGGAGGAAGACGCAGCAGCGTTTCAGGTGAGGGTCGTTTGGACAGGGCTCGGAGGTCACGAATGAGGAAGCAACAGCGATTGAGGGAGTTTATGAGCGAAACAACACAGCTACATAAACAGAACAGTATCTTCCGTGAGAGGATTGATTCTGTCGAGAGAAATCGTAAGAGCACAATTATACGTGATTAA	MVCSGRLADSSTGGDCCVTGPLLEVDDGLVMLLLDGGRRSSVSGEGRLDRARRSRMRKQQRLREFMSETTQLHKQNSIFRERIDSVERNRKSTIIRD*
452	Nicotiana benthamiana	NBEN_155	Niben101Scf09109g00003.1		S	Niben101Scf09109	82762-83055	ATGGTGTGTTCTGGTCGTTTGGCGGACAGCAGCACTGGTGGAGATTGCTGCGTCACTGGTGAGGGTCGTTTGGACAGGGCTCGGAGGTCACGAATGAGGAAGCAACAGCGATTGAGGGAGTTTATGAGCGAAACAACACAGCTACATAAACAGAACAGTATCTTCCGTGAGAGGATTGATTCTGTCGAGAGAAATCGTAAGAGCACAATTATACGTGATTAA	MVCSGRLADSSTGGDCCVTGEGRLDRARRSRMRKQQRLREFMSETTQLHKQNSIFRERIDSVERNRKSTIIRD*
453	Nicotiana benthamiana	NBEN_156	Niben101Scf09172g02011.1		S	Niben101Scf09172	305952-306245	ATGGTGTGTTCTGGTCGTTTGGCGGACAGCAGCACTGGTGGAGATTGCTGCGTCACTGGTCCGTTGCTGGAGGTTGACGACGGGCTGGTGATGTTGCTGCTCGACGGAGGAAGACGCAGCAGCGTTTCAGGTGAGGGTCGTTTGGACAGGGCTCGGAGGTCACGAATGAGGAAGCAACAGCGATTGAGGGAGTTTATGAGCGAAACAACACAGCTACATAAACAGAACAGTATCTTCCGTGAGAGGATTGATTCTGTCGAGAGAAATCGTAAGAGCACAATTATACGTGATTAA	MVCSGRLADSSTGGDCCVTGPLLEVDDGLVMLLLDGGRRSSVSGEGRLDRARRSRMRKQQRLREFMSETTQLHKQNSIFRERIDSVERNRKSTIIRD*
454	Nicotiana benthamiana	NBEN_157	Niben101Scf09424g04003.1		I	Niben101Scf09424	434799-442774	ATGCAAGATCCGTCAAATCCAAACTCCAAGAATCAAACGCCGTCATTTTCAGCTACATTCAGGCCATCTCACCACCGGCGAGCTCATTCTGAAGTGAACTTCCGGCTGCCGGAGGATCTAGATCTAGTATCCGACCCATTCGATGCGTCCACCGGGAGTTTCGAGGAGATCGGATCCGAGGAAGATTTCTTCTCCACTTACATGGACATTGAGAAACTCGGCACCGGATCCAACCCTACTGATGGATTCAACAATGCTGCCGGAAGTAGTAGTGGACTACTGGTAGCTGACGGAGAGAAGACTTTCAGTAGGCCACGTCATAGGCATAGTAATTCTGTGGATAGTTCCAGTTTGTTGCTAAGTGAGAGTATTGAAGCTAAGAAAGCTATGGCTCCAGAT…	MQDPSNPNSKNQTPSFSATFRPSHHRRAHSEVNFRLPEDLDLVSDPFDASTGSFEEIGSEEDFFSTYMDIEKLGTGSNPTDGFNNAAGSSSGLLVADGEKTFSRPRHRHSNSVDSSSLLLSESIEAKKAMAPDKLAELWTIDPKRAKRILANRQSASRSKERKARYMTELERKVQTLQTEATTLSAQLTLFQRDTTQFTNENTELKIRLQAMAQQAQLRDALNEALKQEVERLKMATGEMSSSSDAYNLGMQHIPYNQSAFFSHQTQSGPNESQNIQMQQFHSLQDSLLTPHRRLFAGHGQALPDTMQQDPLGRFQGLDIGGRGMHHVKTETPSISASESSSTL*
455	Nicotiana benthamiana	NBEN_158	NBEN_bZIP.Niben101Scf09489.1		E	Niben101Scf09489	104105-107749	ATGGCAAATTCCAAGGGGCCATCTAGCATGAGACATATGATGTACAATGGAAAGAGCTCTTTACTGCCTCCTAAAAGTCCGTTTCCTAGCACATGTCCCTCGTATGTTGATTATCTCCCTAGTTCTGCTGTCATCCAAAAGGGCATTTCGAAATGTAGAGACGGTTCACACCATCAGCGTACTTCTTCTGAAAGCTGTCTTATAGAGGAGCAACCATCTTGGTTAGATGATCTTCTTAATGAGCCGGAAACTCCTGTACGCAGAGGTGGCCACCGACGTTCATCTAGTGACTCCTTTACATATTTTGATGCTGCTAATATTGCAAACTTAGATTACATAGCGCATGATGATAACAAATTCAGAAATATAACTCCTGCCGCTTCCTGGGGATCCCAAGAC…	MANSKGPSSMRHMMYNGKSSLLPPKSPFPSTCPSYVDYLPSSAVIQKGISKCRDGSHHQRTSSESCLIEEQPSWLDDLLNEPETPVRRGGHRRSSSDSFTYFDAANIANLDYIAHDDNKFRNITPAASWGSQDFDYYKDARHATFHVDQNSSNQQKSRSRDASPNAKPHLRGLPPSRENVKTHSLGSSFPPQEGERPKSAGSDKQDLLESVTPDPKGSGEKKDSSHSKSSASENDTKRAKQQFAQRSRVRKLQYISELERNVQVLQACSEVSAELEFLNQQSLILSMENKALKQRLENLAQEQMIKYLEHEVLERERGRLRALYQQQQLPQSQQQQQSSSSHRRTTSRDLDQQFANISLKHKDGS
456	Nicotiana benthamiana	NBEN_159	Niben101Scf09716g02002.1		D	Niben101Scf09716	289390-294628	ATGCAAGCTTTCAAAGCAGCAGTATTACCAGCTGTTACTCTTAATAATAATAATAATAATAATTCTAATATGTATTGCCACTCATCTTTATACCTCAGAGGTGATGAAGCAACTAGACATGCAGCAGCACGTTTTGCTGATATTGGAGAACTTGAACAGTCTACAGGATTTCCTCAAGAAGATGCTGTTGATTTAAGCAGAAGTTCAGTATATGGTGAGATGAGACCAAACAATGTTGCTGTTAGTATAGGGTCAACAGAAATGGGTTCATCAGAAACAGGAGGGGTGGAAGCAGGGGGAAGGTTTATATTGCACAAGGCACAAACTGCAATGGTGGGTGGTGGTGGCGGCGTCGGCGGACTTGTAGGTGGTGGTATTGTGCCTTTGGGAAATGGCCTT…	MQAFKAAVLPAVTLNNNNNNNSNMYCHSSLYLRGDEATRHAAARFADIGELEQSTGFPQEDAVDLSRSSVYGEMRPNNVAVSIGSTEMGSSETGGVEAGGRFILHKAQTAMVGGGGGVGGLVGGGIVPLGNGLFENWADSGIADHSHSQQTDTSTDVDTDERNHQGQGVQHGALMAVDSIDQSKVKHGDQKSLRRLAQNREAARKSRLRKKAYVQQLETSRLKLSQLEQELKRARQQGIFIANGYAGDQSLSAGGNGALAFDMDYARWLEDHQRLINDLRSAVNSHRGDNELRLLVDGVMLHYDEIFKLKSVGAKSDVFHMLSGMWKTPAERCFMWLGGFRSSELLKILGNHLEPLTEQQLMGICNLQQSSQQAEDALSQGMEALQQSLVDTLSSTSLG…
457	Nicotiana benthamiana	NBEN_160	Niben101Scf09878g03001.1		S	Niben101Scf09878	351218-351712	ATGGCTACATCTAGTGGAAATTCAACTGGATCAACTCAGATTTTGAACTCAGGTTCTGAAGAAGATTTGCAGGTTTCAATGTTAGATGAAAGGAAAAGAAAGAGAATGCAATCAAATCGTGAATCAGCAAGAAGATCAAGGATGAGAAAACAGAAACATCTTGACGATTTAATTGGTCAAGTTGCGCAACTGAAAAAGGAAAACAACAATATCCTTAGCAACATCAACTTGACAAGTCAACAGTACGCTAATGTTGAAGCAGAGAACTCTGTTTTAAGAGCTCAGATGATGGAACTTAGTCAAAGGTTGCAATCTCTTAATGAAATCCTCACTTACATCAATTCCAACAACAACAACGACAATAATAATAATAATAACTACGGAGTTTTTGAAACTCAT…	MATSSGNSTGSTQILNSGSEEDLQVSMLDERKRKRMQSNRESARRSRMRKQKHLDDLIGQVAQLKKENNNILSNINLTSQQYANVEAENSVLRAQMMELSQRLQSLNEILTYINSNNNNDNNNNNNYGVFETHHHYQEDMMNNPWNLMYVNQPIMASADMLYQY*
458	Nicotiana benthamiana	NBEN_161	Niben101Scf10067g01005.1		D	Niben101Scf10067	118375-124547	ATGAATTCTTCGACATACACCCATTTTGTCGCCTCAAGAAGAATGGGTATATGCGATCCGATCCATCAACTTGGAATGTGGGATGATTTCAATGGTAGTTTCCCAAGTACATCGGCAACCATGATTTTAGAAATTGATAAATGCCTAGAGGACCAGATACCAATTATGGAGAAAAGACTAGACAACGAGACTGAAGACACTTCGCATGGAACAGTAGGGACTTCTAACAGATATGAACCAGAAACAAGTAAACCCGTCGAGAAGGTACTTAGACGTCTTGCACAAAACCGTGAGGCTGCTCGTAAAAGCCGTTTGAGGAAGAAGGCCTATGTTCAGCAGTTAGAAAATAGTAAATTGAAGCTGATTCAATTGGAACAAGAATTAGAACGTGCCAGAAAA…	MNSSTYTHFVASRRMGICDPIHQLGMWDDFNGSFPSTSATMILEIDKCLEDQIPIMEKRLDNETEDTSHGTVGTSNRYEPETSKPVEKVLRRLAQNREAARKSRLRKKAYVQQLENSKLKLIQLEQELERARKQGLYAGGGLDASQLSYSGTASSGTAAFDIEYGHWVEEQTRQTNELRSALHSQIGEAELRIIVDGYLSHYFDLFRMKATAAKADVLYIMSGMWKTSAERFFMWIGGFRPSELLKVLTPHLELLTEQQLREVCNLTQSCQQAEDALSQGMVKLHQILAEAVAAGRLGEGNYTLPQMGPAIEKLEALVRFVNQADHLRQETLQQMSRILNTYQAAQGLLALGEYFERLRVLSSQWATRLREPT*
459	Nicotiana benthamiana	NBEN_162	Niben101Scf10919g01034.1		I	Niben101Scf10919	191213-195025	ATGGGTGGTGACAATGAGGAAGGAAATAGTGATATGGTGCAAAGACTTCAATCATCATTTGGTACATCATCTTCTTCATTACCTAAGCAACATCAATCTTTATTATCAATGGACCAATTGGATATACCTCAATTGACTAATAGTTCCCAATTTCGTGGACAAATGAGGCAATTTTCACCCAACTTTAGTGTTGAAAATAGTACTAGTAAGAGAGTAGGCATACCGCCTTCTCACCCACAAATGCCCCCTATTTCACCTTACTCTCAGATCCCTGTAACAAGGATTGTGAATCAGCAAATGGGAATGCAGAGTTTTACTAGTCCAGGGCCATCGCATTCGCGATCTTTATCACAACCATCGTTTTTCTCATTGGATTCTTTGCCACCCTTGAGCCCTTCA…	MGGDNEEGNSDMVQRLQSSFGTSSSSLPKQHQSLLSMDQLDIPQLTNSSQFRGQMRQFSPNFSVENSTSKRVGIPPSHPQMPPISPYSQIPVTRIVNQQMGMQSFTSPGPSHSRSLSQPSFFSLDSLPPLSPSPYRESSSTSMSDPISADVSMGDQDGNSHSLLPPSPFMRCNSSRAGESLPPRKAHRRSNSDIPFGFSAMMQSSPPLVPLRSPGSLERSVPSREKPIQLVKREAMWDKGNDSNAEGMGERKSEGEVVDDLFSAYMNLDNIDALNSSGTDNKLGNENREDLDSRASGTKTNGGDSSDNEATSSVNDSGSSMQRLGISSSVEKKEGIKRSAVGDIAPTTRHYRSVSMDSFMGKLNFVDDSPKLPPSPGPRPGQLSPTSSLDANSNSFSLE…
460	Nicotiana benthamiana	NBEN_163	NBEN_bZIP.Niben101Scf11251.1		M	Niben101Scf11251	69363-77633	ATGGAAGATAAACGTAAAAGATCTGAGCTTGAATTAGCTTTGTCTCTTAAAAGTCCAACTGATAATCAAGATGAATTATCAGCTAATAGGCGTACGGTTCCTCTAACCCTAGATCAAGCAATTGATTTTGAACTGAACAAGCTCGGTCGAAATATTGATTCTGACGTGGATTTGAAAAAGCTCAGAAGGACTGTATCAAATCGATTGTCTGCGCAAAGATCTAGGATTAAGAAGACTGAATATATCACTGAGTTGGAAAAGAAGGTGAAAGACCTCCGGGATACCATAGCTTATCTATCACCAGAAATAGAAAATTGCAAAGAAAAGCAATCGATGTTGCGGATGCAAAGAAAATATTTGCAAGAACAATTGGATAGCTTCACTGACAGATCCAAGCTA…	MEDKRKRSELELALSLKSPTDNQDELSANRRTVPLTLDQAIDFELNKLGRNIDSDVDLKKLRRTVSNRLSAQRSRIKKTEYITELEKKVKDLRDTIAYLSPEIENCKEKQSMLRMQRKYLQEQLDSFTDRSKLRTVQIEEMKLELRRLKELAKAQEEHYNMQLGQTSNYFYLSEMEQQAAAAIDQYLNLDAINFYPPKNEM*
461	Nicotiana benthamiana	NBEN_164	Niben101Scf11480g03027.1		S	Niben101Scf11480	349590-353751	ATGTCAGCTTTAAGGCAGAGTGCTAGTTCATCTGCATCAGAAGATGATCAAAGGTATGCAGGAGTGGATGAAAAGAAGAGGAAAAGGATGATTTCTAACAGGGAATCCGCGAGGCGGTCGAGGATGAAGAAGCAAAAGCTCCTGCAAGATTTGACTGGGGAAGTGAGCAGATTACAGGCTGCTAACAAAAACATTATGGCTAAAATTGAAGAGACCACAGAGAGATATACAGTTTGTACTGCACAGAATAATGTGCTGAGGGCACAGGCAAGGGAATTGGATGATAGGCTGAGAGAATAA	MSALRQSASSSASEDDQRYAGVDEKKRKRMISNRESARRSRMKKQKLLQDLTGEVSRLQAANKNIMAKIEETTERYTVCTAQNNVLRAQARELDDRLRE*
462	Nicotiana benthamiana	NBEN_165	Niben101Scf11737g00001.1		K	Niben101Scf11737	30843-34103	ATGGTGGAAGACATCGATGATATCGTTGGACACATCAATTGGGACGATGTAGATGACCTCTTCCACAATATTCTAGAAGATCACGCCGACAATCTCTTCTCTGCTCATGATCCGTCCGCGCCGTCTATCCAGGAGATAGAGCAGCTTCTCATGAAAGACGATGAAATCGTCGGTCACGTGGCTGTCAGGGAGCCTGATTTTCAACTTGCTGATGACTTTCTCTCCGACGTGCTGGCCGATTCTCCTGTTCAGTCCGATCATTCTCACTCTGATAAAGTCAATGGATTCCCCGATTCCAAGGTTTCAAGTGGCTCCGAGGTTGATGATGACGACAAAGACAAGGAGAAGGGTTCCCAGTCGCCGACTGAGTCTAAGGACGGCTCCGACGAACTAAACAGT…	MVEDIDDIVGHINWDDVDDLFHNILEDHADNLFSAHDPSAPSIQEIEQLLMKDDEIVGHVAVREPDFQLADDFLSDVLADSPVQSDHSHSDKVNGFPDSKVSSGSEVDDDDKDKEKGSQSPTESKDGSDELNSNDPVDKKRKRQLRNRDAAVRSRERKKLYVRDLELKSRYFESECKRLGMEVLMVLV*
463	Nicotiana benthamiana	NBEN_166	Niben101Scf12039g00002.1		E	Niben101Scf12039	6312-8218	ATGGCTCATTTACCACCTAGAGTACCAAACATGACACCAAATTGGCCTGATTTTTCACATCATCAAAAAGTAGACATCACCACAACTACGGCAATTCACAACCCCTCATGGGTAGACCAATTCCTCGACTTCTCATCGATGAAACGAGGTTCACATCGGAGATCTATTAGTGATTCAATAGCTTTTCTTGAAGCTCCAATGGTTGAAGAACGCAGAAGGCTATCAACTCCAGGAAAAACAACTGGTTCAGAATTTGAAAGATTTGACGATGAACAACTCATGTCAATGTTTAACGACNAAACAACTGGTTCAGAATTTGAAAGATTTGACGATGAACAACTCATGTCAATGTTTAACGACGATATTGCCAATCCTTCGTCGCCTTCGGACAATAACAGC…	MAHLPPRVPNMTPNWPDFSHHQKVDITTTTAIHNPSWVDQFLDFSSMKRGSHRRSISDSIAFLEAPMVEERRRLSTPGKTTGSEFERFDDEQLMSMFNDXTTGSEFERFDDEQLMSMFNDDIANPSSPSDNNSINEEKKMSTIISSDDQVMQQQQQLKTEPEEVESSCKSDQHATADNNSSRKIVDPKRIKRILANRQSAQRSRVRKLQYISELERSVTTLQVCKMIPSFNFLFY*
464	Nicotiana benthamiana	NBEN_167	Niben101Scf12670g00009.1		I	Niben101Scf12670	78287-84310	ATGGATAAGGATAAGTCTTCAAGCCATACAGTAGGTTCATTGCCTCCATTCGGGAGATACTCATTGTTTTCACCTCCTGGGGGTAGTTCCAATGCAAAGTTGGAACAATCTGGATTAGCTAATTTACCTCCCTTAGGACCTGGAAATGCTTCAGAATCAGGTCATTTTTGTCATGGTTTGTCGGCTGATTCTAGCCGATTTAGTCATGATATAAGCAGAATGCCTGATAACCCGCCTAAGAAATTTGGTCATCGGCGTGCCCACTCGGAGATTCTTACTCTTCCTGATGATATTAGCTTTGATAGTGATCTTGGTGTTGTTGGTGGACTGGATGGACCGTCTCTGTCGGATGAGACTGAGGAGGACTTCCTCTCAATGTACCTTGACATGGATAAGTTT…	MDKDKSSSHTVGSLPPFGRYSLFSPPGGSSNAKLEQSGLANLPPLGPGNASESGHFCHGLSADSSRFSHDISRMPDNPPKKFGHRRAHSEILTLPDDISFDSDLGVVGGLDGPSLSDETEEDFLSMYLDMDKFNSSSVSSDFQVDESSSSAAAASGSLQIPAMASAAAGSDNVGPTASVKPRVRHQHSQSMDGSTAIKPEMLMSGVDEASPLETKKATSAAKLAELALVDPKRAKRIWANRQSAARSKERKMRYIAELERKVQTLQTETTTLSAQLTLLQVHITLNDALKEEIQHLKVLTGQGIANGGPMMNFPTSFGRNQQFYSNNHAMHTLLAAQQLQQLQIHSHKQQHQFQQHQLHQFQQQQQLQHQQQLQEQLHQAGDMNSRSSLSSPQNDNASD…
465	Nicotiana benthamiana	NBEN_168	Niben101Scf13047g00005.1		D	Niben101Scf13047	13961-24556	ATGGAGAGTCAAAGAATAGGAGAGAGTGGTAGTTTGTCTGCTGAATCAGGACCTTCACACCACCATCACAATATGTCTTATGCACTTTTTCGTGGCCTAAATCCTCCTAATACAAGTTTCATGTATCATTCCACTACAAATAATCAAGAACCGCCAGTTTTTGGTTTTGGGGAGTTAGAGGAAGCTATTGCGTTACAAGGAGTTAAGATGAGCAATGATGAAGCAGCTAAAGCATATTTTGCTTTTGTGATTCTGTGCAGCTTTATATGCAACTACGAACAGACCTGCTGCAACTCTGGAGATGTTCCCTTCTTGGCCTACGAGATTCCATCACACCCCAAGAGTTCAGCACTAAACACTTATTCAAGCAGAGGTGAACCTCATTTGGAACCAGAATCT…	MESQRIGESGSLSAESGPSHHHHNMSYALFRGLNPPNTSFMYHSTTNNQEPPVFGFGELEEAIALQGVKMSNDEAAKAYFAFVILCSFICNYEQTCCNSGDVPFLAYEIPSHPKSSALNTYSSRGEPHLEPESPPISGKPSSDYQSLEQNQQQLQNQQQQLQEMASDSPRIVVSHTEPASKPNHEKRKGVGSTSDRVVDAKTVRRLAQNREAAKKSRLRKKAYVQQLETSRIRLAQLEQELQRARSQGLFMGGGAAAGAYISSAGAAIFDMEYSRWLDDDQRHISELRTALQAHLGDGDLRIIVDGYIAHYDEIFQLKGVAAKSDVFHLITGMWTTPAERCFLWMGGFRPSELIKQQVVGIYSLQQSSQQAEEALSQGLEQLQQSLIETVATASLNDGM…
466	Nicotiana benthamiana	NBEN_169	Niben101Scf13146g00014.1		S	Niben101Scf13146	38109-38402	ATGGTGTGTTCTGGTCGTTTGGCGGACAGCAGCACTGGTGGAGATTGCTGCGTCACTGGTCCGTTGCTGGAGGTTGACGACGGGCTGGTGATGTTGCTGCTCGACGGAGGAAGACGCAGCAGCGTTTCAGGTGAGGGTCGTTTGGACAGGGCTCGGAGGTCACGAATGAGGAAGCAACAGCGATTGAGGGAGTTTATGAGCGAAACAACACAGCTACATAAACAGAACAGTATCTTCCGTGAGAGGATTGATTCTGTCGAGAGAAATCGTAAGAGCACAATTATACGTGATTAA	MVCSGRLADSSTGGDCCVTGPLLEVDDGLVMLLLDGGRRSSVSGEGRLDRARRSRMRKQQRLREFMSETTQLHKQNSIFRERIDSVERNRKSTIIRD*
467	Nicotiana benthamiana	NBEN_170	Niben101Scf13168g00007.1		D	Niben101Scf13168	107167-111925	ATGAACATGACTTCACCAACAACTCAATTTGCCCCCACAAGAAGGATGGGTATATATGAACCATTTCACCAGATGAGCGTGTGGGAAGACGCATTTAGAGGTGACATTATTCCTAGCTCTGATCCATGTATGGTTTCACAGCCAAACGACAGGCCAGATGACAAGTCGGGATATACGTCTGGTGAACAGCATATGCCCTCTGGCTCCGGGGAGAATCAAGCACCGAGGAGTACTTCAGAAAAGGTACAACGACGTCTAGCACAAAATCGTGAAGCTGCACGTAAAAGTCGTATGCGGAAAAAGGCTTATGTTCAGCAGCTGGAAACAAGCCGTTTAAAGCTGGCCCAACTTGAGTTAGAGCTCGAGAGAGCTAGACAGCAGGGACTATACATGTTAGGT…	MNMTSPTTQFAPTRRMGIYEPFHQMSVWEDAFRGDIIPSSDPCMVSQPNDRPDDKSGYTSGEQHMPSGSGENQAPRSTSEKVQRRLAQNREAARKSRMRKKAYVQQLETSRLKLAQLELELERARQQGLYMLGSNSNMGLLGTINPGIAAFEMEYSHWVEEQQKKNAELRSILQSPVSEMELQLLVENVLSHYFNLFRMKADAAKTDVFYLMSGMWRTSVERFFLWIGGFKPSDLINVVMPQLEPLTDQQIIKVCNLRHCCQQAEDALTQGMDKLQQTLAQSILNMTTGAGNYSSQMVSSMENLEALESFVNQADHLRQQTLQQMSIILTTPQAARGLLAFGEYLQRLRALSSLWAARPREPT*
468	Nicotiana benthamiana	NBEN_171	Niben101Scf13361g01009.1		J	Niben101Scf13361	166106-170014	ATGCCCCGTGGGCAGGAATCTGAACTCAAAACAAGCCATCGTCACGCTCTAAATTATCTGCCAATTGCCAGCAGAAAATCGAGGCAGAATTTGACCGAGGAGGAGAGGGAAGAAAGAAGGTTGTATCGTGTCTTAGCAAATAGAGAGTCTGCTAGGCAGACAATTCGTCGGAGACAGGCCACGCATGAAGAATTGACAAAAAAAGCAGCTGATCTTGCATCGGAGAACGAAAATTTGAAGAAGAGAAAGGAGCTGGCAGCTAAGGAGTACGAGCTTTTGAAGAACAAAAATACTAGCTTAAGAGTACGGGTAGCTAAAATAGAGAAGGCCGAAGCAGAGGAAACAGATGGTGGTTCTAAGTCAAAACCTGTAGAAATCTCCACTACAAATACAGCTGCA…	MPRGQESELKTSHRHALNYLPIASRKSRQNLTEEEREERRLYRVLANRESARQTIRRRQATHEELTKKAADLASENENLKKRKELAAKEYELLKNKNTSLRVRVAKIEKAEAEETDGGSKSKPVEISTTNTAATSNPTPNPILPSLFNQSPITPFFWPSIVQPFNAFLLQCGSQNISDITSVLSSPTSGELNSINRQESSNPENPLFVLPVPCLIPFHPQSSSPFLPWSSTLTDKHSETSSVHQCSTSYLNTENNQAVIAHEAEADAPQSIKATQRDFLHESALRFPPEGGVSKGSLQPSSSHVQLGTSERVCYQLDNAPDIGAVSCTVGHVTDTSEMTSQESITSSSKNPVDAHATAEARKRRKELLKLRSQHSDQFGPNH*
469	Nicotiana benthamiana	NBEN_172	Niben101Scf13556g00002.1		S	Niben101Scf13556	58081-58746	ATGTTGTCCACTTTTCCGGCCCTTACTCTGCCCGCCGATGGGCTCTTTACCCACTTGTTTCCGGCTTTTGATGGAGGTTTCACTTCGTGGGAGTGTATCGAGCCGGCTTATCTAATTCCACAACAAGTGGAAGAAGAACCGGTTATTTCTCCTAAAGAATCACCACCGCCGGAACCGGTTATATCCAACTCCGGTTCAGGGTCCGATGACTCTAAACTGAATTTTGTTCATTCTAGTTCCGGTTCTGATGAACCAAGCCAGAACAACAGCAACGATAATAATAACAGGAAATGCTGTCCGGATAAGAGAAAGCGGAAGAATACGACTTCGAACCGGGACATAGATGAGAGAAAGCATCGTCGGATGGTCTCGAACCGGGAATCAGCCAGGCGGTCTCGC…	MLSTFPALTLPADGLFTHLFPAFDGGFTSWECIEPAYLIPQQVEEEPVISPKESPPPEPVISNSGSGSDDSKLNFVHSSSGSDEPSQNNSNDNNNRKCCPDKRKRKNTTSNRDIDERKHRRMVSNRESARRSRMRKQKHLENLRNQANRLKVGNRVLTNQFRLMTHQFQLVQCDNERLRTESALLRQRLEGIRQILLARQLEQQFNAYSAWACNNMEERPQ*
470	Nicotiana benthamiana	NBEN_173	Niben101Scf13865g00004.1		G	Niben101Scf13865	56329-60036	ATGCCACCCTATGGTACTCCACCACATCCTTATGTTGCAATGTATCCCCATGGTGGAATATATGCTCATCCATCTATTCCTCCGGGATCTTACCCCTTCAGCCCCTTTGCGATGCCTTCTCCAAATGGCGTTGCTGAGGCTGCAGTGAACACCTCTGGCAATGCTGAAGTAGATGGTAAATCATCCGAGGGAAAGGAGAAACTGCCTATTAAAAGATCTAAAGGAAGCTTGGGTAGTTTGAATATGATTACAGGGAAGAATAATGAGCCTGGTAAAACGTCTGGAGCATCTGCAAACGGAGCCTATTCTAAAAGTGCCGAGAGTGGAAGTGATGGCTCAAGCGAAGGGAGTGATGCAAATTCTCAAAATTATGATGTTTCTGCTACAGCTGAAGCATCT…	MPPYGTPPHPYVAMYPHGGIYAHPSIPPGSYPFSPFAMPSPNGVAEAAVNTSGNAEVDGKSSEGKEKLPIKRSKGSLGSLNMITGKNNEPGKTSGASANGAYSKSAESGSDGSSEGSDANSQNYDVSATAEASQNDNSAHSSQNGGTSAPHSLMNQTMPIMPMSAAGGIPGPTTNLNIGMDYWSAATSPSMPTIHGKVPSASVAGGMVTAGSRDIVQSQMWIQDERELKRQRRKQSNRESARRSRLRKQAECDELAQRAEALKEENTSLRAELSRLRSEHDQLAAQNASLKERLGEVPGQEDPRPSRYDIHLGKDTQHSSQTEPTQAGQ*
471	Nicotiana benthamiana	NBEN_174	Niben101Scf13868g00003.1		S	Niben101Scf13868	33846-34439	ATGATTCCCTCAGAGGCTGCAGCAGTTCACTACTTTGCTTCTGAAAATACTTCACCTCTTCCTCTTGATTTCAACTTCACGCACAACAATTTACCATCACTACAGTTCAACAGATACTTAACCAATCTACCAAACTATCCAATCTCTTTTCCTGTTCATGACTTCAATAATATGCCACCATCTTCCATCAGCGGTAATTCTACGTCTGATGAAGCGGACGAGCAGCAACTTAGGATCATCGACGAGAGAAAGAAAAGGAGGATTATATCTAATAGGGAATCAGCAAGAAGATCAAGGATGAGGAAACAAAGACACCTTGATGAACTATGGTCACAAGTTCTTCGTCTTAGGACGGAGAATCATAATTTGATCGATAAGTTGAATCAAGTCTCCAATTGC…	MIPSEAAAVHYFASENTSPLPLDFNFTHNNLPSLQFNRYLTNLPNYPISFPVHDFNNMPPSSISGNSTSDEADEQQLRIIDERKKRRIISNRESARRSRMRKQRHLDELWSQVLRLRTENHNLIDKLNQVSNCHERVLQENAELKQEASDLRQMLTHLQINCSFPDLFDLEDIPCTTAHLKAESSNLFITHCTNLLH*
472	Nicotiana benthamiana	NBEN_175	Niben101Scf13926g00004.1		A	Niben101Scf13926	15737-20833	ATGGGATCTTACATGAACTTCAAGAACTTTGCTGACCCACCGCAGACAGAGAGCAATGGTGGGATGCCAATAGGAAGTGGTAATTTTCCTTTGGCAAGACAATCTTCCGTATACTCGTTAACTTTTGATGAGCTCCAGAGTACTTGCGGACTTGGAAAAGATCTTGGATCAATGAATTTGGAGGACTTATTGAAGAACATTTGGACAGCTGAAGAATCTAATGTTGTAGCATCTGCGGCTGGCGTTGGAAATGAGAATACGGCTGGAGAGAATTTGCAAAGACAAGGTTCTTTGACATTGCCTCGGACTCTTAGTCAGAAAACTGTGGATGAAGTATGGAGAGATTTCCAGAAAGAAACAACAGTTAGTTCTAAATATGGAAGTGGTACGGAATGGCCA…	MGSYMNFKNFADPPQTESNGGMPIGSGNFPLARQSSVYSLTFDELQSTCGLGKDLGSMNLEDLLKNIWTAEESNVVASAAGVGNENTAGENLQRQGSLTLPRTLSQKTVDEVWRDFQKETTVSSKYGSGTEWPNLGQRQSTLGEMTLEEFLVRAGVVREDMQLTGSSNDVRFTGGLSQPCTNNNCLNIVFQQPTQNPGLVSATSSQQKPNVAFASPMQLGTNGQLANTGARTPVISMSSPSVNTSTVVQGSVMQSGVKGLAGSLNGVTPAKRGSPGNQLSPDMIAKKELDRSSLSPSPYAFSEGGKGRRSCNSLEKVVERRRKRMIKNRESAARSRARKQAYTLELEAEVEKLKEINEELHKKQAEFIEMQKNQLMDKMNMPRGNKLRCLRRTLTGPW*
473	Nicotiana benthamiana	NBEN_176	Niben101Scf14115g01004.1		G	Niben101Scf14115	213659-222976	ATGGGTAGCAGTGAGATGGATAAATCCTCAAAGGAGGCAAAGGAAGCAAAAGAGCCGAAGACTCCCAATTCACAGGAGCAGGCTTCTACCACTACCGCCAGCTCAGTCAATCCAGATTGGTCTGGCTTTCAGGCATATTCTCCTATGCCTCCACATGGGTTTATGGCATCAAGTCCTCAAGCACACCCTTATATGTGGGGGGTTCAGCAATTTATGCCACCCTATGGAACTCCACCACATCCATACGTTGCAATGTATCCCCATGGTGGCATATATGCTCATCCATCGATGCCTCCGGGATCTTACCCTTTCAGCCCTTTTGCGATGCCTTCCCCAAATGGTGTCGCTGAAGCTGCAGTTAGCAACGCTGGTAATGTTGAAGTAGATGGTAAGTCATCC…	MGSSEMDKSSKEAKEAKEPKTPNSQEQASTTTASSVNPDWSGFQAYSPMPPHGFMASSPQAHPYMWGVQQFMPPYGTPPHPYVAMYPHGGIYAHPSMPPGSYPFSPFAMPSPNGVAEAAVSNAGNVEVDGKSSEGKEKLPIKRSKGSLGSLNMITGKNNGPGKTSGASTNGVYSKSAESGSEGSSEGSDANSQNVGIESPMNSGGGQDSADTSQNGNAAHGSQNGGTGGAPHSMINQTMAIVPISAAAAGGIPGPTTNLNIGMDYWGAATASSIPAIHGNVPSASVAGGLVAAGSRDSAQSHMWIQDERELKRQRRKQSNRESARRSRLRKQVQIILQFFPFSIIINPDSTSPFVSQAECDELAQRAEVLREENSSLRAEVNRIRSEYEQLLAQNASLK…
474	Nicotiana benthamiana	NBEN_177	Niben101Scf15744g00003.1		H	Niben101Scf15744	10359-15496	ATGCAAGAACAAGCGACCAGTTCCATTGCTGCTAGTTCTATACCTTCAAGTAGTGAGAGATCTTCTAGCTCTGCTCTCCATTTTGAAATCAAAGAAGGTATGGAGAGTGATGATGAGATCAGAAGAGTGCCGGAGATGGGCGGAGAAGCCACCGGAACCACCTCAGCTTCTGGTAGAGATGGCACTTCCGCCACCGGTCAAGCTCAGCCTTCAGCTGGTACTCAAAGGAAGAGAGGAAGAAGTCCAGCTGACAAAGAAAACAAGAGGCTAAAAAGGTTGTTGAGAAATAGAGTGTCAGCACAGCAAGCAAGGGAAAGGAAGAAAGCATACTTGATAGATCTAGAAGCAAGGGTGAAAGAATTGGAAACAAAGAATGCAGAACTTGAAGAGAGGTTATCC…	MQEQATSSIAASSIPSSSERSSSSALHFEIKEGMESDDEIRRVPEMGGEATGTTSASGRDGTSATGQAQPSAGTQRKRGRSPADKENKRLKRLLRNRVSAQQARERKKAYLIDLEARVKELETKNAELEERLSTLQNENQMLRHILKNTTAGAQEGRK*
475	Nicotiana benthamiana	NBEN_178	NBEN_bZIP.Niben101Scf16582.1		S	Niben101Scf16582	7119-7553	ATGGCTCCGACACAGCAACCAGCTAGTTCAGGTTCTGATGGCCAACGTTATGCCACGAATGACGATAGAAAACGAAAGAGAATGGAGTCCAACCGTGAATCTGCAAGGCGGTCACGGATGAGGAAGCAGCAGCATTTGGAGGAGTTGATGAGCCAAATGGCACAGCTACAGAATCAGAATCTTCTGTGGCACGAGAAGATTGATGATGTGGGAAGAAACTACCTGACGCTCGATGCGGAGAACAATGTCTTGAGGGCTCAAATGGCAGAACTGACTGAACGCTTGGATTCTCTCAATTCGCTCACTCGTTTCTGGGCTGATGCTAATGGACTAGCTGTGGATATCCCTGAAATTCCAGACACTTTGCTTGAGCCCTGGCAGCTTCCTTGCCCAATTCAA…	MAPTQQPASSGSDGQRYATNDDRKRKRMESNRESARRSRMRKQQHLEELMSQMAQLQNQNLLWHEKIDDVGRNYLTLDAENNVLRAQMAELTERLDSLNSLTRFWADANGLAVDIPEIPDTLLEPWQLPCPIQPITASADMLQF*
476	Nicotiana benthamiana	NBEN_179	Niben101Scf17398g00005.1		S	Niben101Scf17398	123562-123996	ATGGCTTCTTCTCCTAGTGGAACATCTTCAGGGTCAGAGGATATTCAGCAACTAATGGACCAAAGGAAACGAAAAAGAATGATATCAAACAGGGAATCAGCAAGAAGATCAAGAATGAAGAAGCAAAAGCATTTGAGTGAGCTAATGGTTCAAGTGAATCAACTCAAGGATCAAAATAATCAAATTGTAACAAACATAAATATGGTGACTCAGGTTTGTTTGAACGTTGAAGCAGAGAACTCTGTTCTTAGAGCACAAATGGCAGAATTAAGCCACAGGCTTCAGTCCCTAAACGAGATCATTAACTGCATAAACTCTGCAGCAACAATGATTGACGACGCAGAGGTTAATGGTGAAGATGATTTCTTGAATCCTTGGAATTTGCTACATGTGAATCAG…	MASSPSGTSSGSEDIQQLMDQRKRKRMISNRESARRSRMKKQKHLSELMVQVNQLKDQNNQIVTNINMVTQVCLNVEAENSVLRAQMAELSHRLQSLNEIINCINSAATMIDDAEVNGEDDFLNPWNLLHVNQPIMASADVIMY*
477	Nicotiana benthamiana	NBEN_180	Niben101Scf18662g00010.1		I	Niben101Scf18662	12837-16858	ATGGGGGGTGAAAGTGATGAAGCTAATACTGAGATGATGCGGAGACTTCAGTCATCATTTGGGACATCATCTTCTTCCCTACAGAAACCCCAATATATTTCGACGAACCAACTTGACATACCTCAGTTGTCTACTTCCCAGTTTCATGGTCAGATGCGGCAGTTTTCTCCTAATTTTGGTGTTGAAAATAGTACCAAAAGGGTTGGTGTATCGCCTTCTCATTTGCAAATGCCCCCTATTTCGCCATATTCTCATATCCCAGTTAGCAGGCCGACAAGTCAGCAACACGGTATGCAGAGTTTTACTACTCAAGGGCCCTCACATTCGCGTTCTTTATCACAACCATCATTTTTCTCGCTCGATTCATTGCCACCCCTGAGCCCTTCGCCATATATGGAA…	MGGESDEANTEMMRRLQSSFGTSSSSLQKPQYISTNQLDIPQLSTSQFHGQMRQFSPNFGVENSTKRVGVSPSHLQMPPISPYSHIPVSRPTSQQHGMQSFTTQGPSHSRSLSQPSFFSLDSLPPLSPSPYMESLSTFISDPVAADVSMEDRDGNSHSSLPPSPFSRCNSSRVGESLPPRKAHRRSNSDIPFGFSSIMQSSPPLVPSRSPAQLVKREAYWDKSNDKNSEGMGERKSEGEDVDDLFSAYMNLDNIESLNSSGIDEKQGNDNREDLDSRASGTKTNGCDSSDNEATSSVNDSGSSMHTLGMSSSTEKREGIKRSAEGDIAPTVRHYRSVSMDSFMGKLNFGDESPKLPPSPGPHHGQLSPSNSLDANSDSFSLEFGNGEFNGAELKKIMAN…
478	Nicotiana benthamiana	NBEN_181	Niben101Scf18667g02004.1		I	Niben101Scf18667	212890-226446	ATGGACCCGAAGTTCGCCGGAAAGCCCATTCAGGCCCAATTCCTATCAGGTCAAACTGACCTTGACCAGATGCAGGATACTCCGACCCGTGGGTCACGTCATCGCCGGGCCCAATCCGAAACCTTTTTTCGGTTTCCAAACTTCGACGATGACATCCTCTTAGACGACGCCGTTACAGACTTCAACCTCGATGTTCAGGCGCCGTCCCTCATGCAGCAGCAGCAGCCTGCAAATTCAGCTGATTCTTCGTCAACTGGGCCGGCGTTATCAGCTGGGCCTTCCGATAATAACCCTAAGCCGCTGGCCCACTACCGTAGTCTCTCTGTGGATGCTGATTTTTTCGATGGACTGGACTTTAGTGCTGCGGCGGCGGAGAATAAGATGATGGGTGGTGGCCCG…	MDPKFAGKPIQAQFLSGQTDLDQMQDTPTRGSRHRRAQSETFFRFPNFDDDILLDDAVTDFNLDVQAPSLMQQQQPANSADSSSTGPALSAGPSDNNPKPLAHYRSLSVDADFFDGLDFSAAAAENKMMGGGPRHRHSNSMDGSFDFESESLSVKKAMAPDKLAELSLIDPKRAKRILANRQSAARSKERKTRYTGELERKVQTLQTEATTLSAQITVLQRDTSGIAAENKELKFRLQALEQQAHLRDALNETLREEVQRLKIEAGQIPAANGNRGTRFHLPPQPQPFVQCGNHHPQHQQQHIPRSTASNQTVPGQSQSSLFNFNSRA*
479	Nicotiana benthamiana	NBEN_182	NBEN_bZIP.Niben101Scf20576.1		D	Niben101Scf20576	64426-65371	GTACAACTACGTTTAGCACAAAATTGTGAAGCTGCCCATAAAAGTCGTATGCGGAAAAAGGCATATGTTCAGCAGCTGGAGACAAGCCGTTTGAAGCTGGCGCAACTTAAGTTAGAGCTCGAGAGAGCTAGACAGCAGGGACTATACATGTTAGGTTCAAATGCCAATATGCGGCTACTTAGAACAATTAATCCAGTTACGCTGCCTATGCAGGAATAG	VQLRLAQNCEAAHKSRMRKKAYVQQLETSRLKLAQLKLELERARQQGLYMLGSNANMRLLRTINPVTLPMQE*
480	Nicotiana benthamiana	NBEN_183	Niben101Scf20887g00017.1		I	Niben101Scf20887	37411-41759	ATGTTGCGCAGGATTTTGGCAAATCGGCAGTCTGCTGCTCGTTCTAAAGAGAGGAAGGCCCGTTATATATCTGAACTTGAGAGGAAAGTTCAGACCCTTCAAACAGAAGCCACTACTCTTTCTGCACAACTGACCCTTTTCCAGAGGGATACAACCGGGCTTACTAATGAGAATACCGAGCTTAAGCTTCGTTTGCAAGCTATGGAACAACAAGCTCAATTACGAGATGCTCTGAACGAAGCACTGAAACAGGAAGTTGAAAGACTTAAAATAGCTACAGGGCAGATATCAGCCTCTTCAGATTCATACAATTCAGGAATGCAGCAAATTTCATATAACCGACCAACATTCTTTCCTCATCAGCCACAGCCAGGGCCAAGTGAACCACCAAACACACAG…	MLRRILANRQSAARSKERKARYISELERKVQTLQTEATTLSAQLTLFQRDTTGLTNENTELKLRLQAMEQQAQLRDALNEALKQEVERLKIATGQISASSDSYNSGMQQISYNRPTFFPHQPQPGPSEPPNTQMPQFHTLQGSMSNPRHPLLAGHAQALTDTMQQDPLGRFQGLDINSRGSHLVKTEAPSISASESSSTF*
481	Nicotiana benthamiana	NBEN_184	Niben101Scf24096g00018.1		K	Niben101Scf24096	86678-89465	ATGGTGGATGACATCGATGATATCGTTGGACACATCAATTGGGACGATGTAGATGACCTCTTCCACAACATTCTAGAGGATCCCGCCGACAATCTCTTCTCTGCTCATGATCCGTCCGCGCCGTCTATCCAGGAGATCGAGCAGCTTCTCATGAACGATGATGAAATCGTCGGTCACGTGGCTGTCGGAGAGCCTGATTTTCAACTTGCTGACGACTTTCTCTCCGACGTGCTAGCCGATTCTCCTGTTCAGTCCGATCTTTCTCACTCTGATAAAGTCATTGGATTCCCCGATTCCAAGGTTTCAAGTTGCTCAGAGGTTGATGATGACGACAAAGACAAGGAGAAGGTTTCCCAGTCGCGGATTGACTCTAAGGACGGCTCTGACGAACTAAACTGT…	MVDDIDDIVGHINWDDVDDLFHNILEDPADNLFSAHDPSAPSIQEIEQLLMNDDEIVGHVAVGEPDFQLADDFLSDVLADSPVQSDLSHSDKVIGFPDSKVSSCSEVDDDDKDKEKVSQSRIDSKDGSDELNCDDPVDKKRKRQLRNRDAAVRSRERKKLYVRDLELKSRYFESECKRLGLVLQCCLAENQALRFSLQNGNANGACMTKQESAVLLLESLLLGSLLWFLGIICLLILPSQPWLIPEENQRSRNHGLLVPIKGGNKAGRIFEFLSFMMGKRCKASRSRMKFNPHSLGIVM*
482	Nicotiana benthamiana	NBEN_185	Niben101Scf24848g00016.1		A	Niben101Scf24848	88593-94902	ATGGCGTCAAAGGTGATGCCGTCAGCGTCAACAACGCCCAATTCGGATCGTTCTTGTTCTCGTTCTTGCCTACCCCAAAACCCAACTCCTTCGTCTTCCTCCTCTTCTCTACTTCACTCTGATCCTTCTAGAAAATTCGGTTCTATGAACATGGACGAACTTCTCAATAACATTTACTCCGATTCCCCCGACCCTTTTTGCTCTGCCTCTGAAACCACCGCGCCTACCCCCGCTGCCGCCGGTGGTGATGGCCGTGATGTGGGACCCAGTAAGACTGTGGATGAGGTGTGGAGGGAAATTGTATCAGGGGGTGGGGTTGGAGGTGGAGGAGGGAGTGGTAGGGAGCCAGAGATGACTTTGGAGGATTTTCTGACCAAAGCTGGGGCGGTTACCGAGGAG…	MASKVMPSASTTPNSDRSCSRSCLPQNPTPSSSSSSLLHSDPSRKFGSMNMDELLNNIYSDSPDPFCSASETTAPTPAAAGGDGRDVGPSKTVDEVWREIVSGGGVGGGGGSGREPEMTLEDFLTKAGAVTEEDVRVPVIAPPPATAAPAAGGFVVDNMGNCQFPMAMQNGPHMGFGNVVVAIAGSGSGSGGSGRGKRRSTVEELPLDKATQQKQRRMIKNRESAARSRERKQAYTVELESLVTQLEEENARLLKEEAEKNKERLKQIMENLIPVVEKRRPPRVLRRVRSMSW*
483	Nicotiana benthamiana	NBEN_186	Niben101Scf25868g00011.1		A	Niben101Scf25868	8030-12382	ATGGGTTCTCACCTGAACTTCAAGAACTTTGTTGACACATCACAGCCAGAGAGCAGTGATGGGAAGCCAATGAATAATGATAATTTTTCGTTGGCTCGACAATCTTCCGTATACTCGTTTACCTTTGACGAGCTCCAAAGTGCATGTGGACTTGGGAAAGATTTTGGGTCAATGAATATGGACGACCTATTGAAGAACATTTGGACAGCTGAAGAGTCTCAAGCCATGTCATCTTTTGTTGCTGGTGGAAATGTAAGTGCGCCAGTGGGAAATTTGCAGAGACAGGGTTCTTTGACATTGCCTAGGACAATAAGTCAGAAAACCGTTGATGAAGTATGGAAAGATTTTCAGAAAGAGACTGTTAATGCCAATGATGGAAGTGCCCCTGGAGCATCAAAC…	MGSHLNFKNFVDTSQPESSDGKPMNNDNFSLARQSSVYSFTFDELQSACGLGKDFGSMNMDDLLKNIWTAEESQAMSSFVAGGNVSAPVGNLQRQGSLTLPRTISQKTVDEVWKDFQKETVNANDGSAPGASNFGQRQSTLGEMTLEDFLVRAGAVREDMQPTRYSKDVTFTSGFTQPSSNNSSLNITFQQATQNPQQLSNQIEANNIFNVVNTTSSQQKPQQAQPLFPKQTTVAFASPMQLGNTAQLASLGTRAPIVGMSNPSVNTSIIQGSIMQGGVMDMVGLHNGVTSVKGGSPGNLDPPSLSPSPYACGEGGRGRRSCTSFEKVVERRRKRMIKNRESAARSRDRKQAYTLELEAEVAKLKEIKQELQKKQAEFIEKQKNQAYTLELEAEVSKLK…
484	Nicotiana benthamiana	NBEN_187	Niben101Scf28148g00002.1		G	Niben101Scf28148	1-685	AGATTGAGAAAACAGGCTGAAGCTGAAGAGTTGGCAATACGAGTTCAGTCTTTAACAGTGGAAAACATGACAGTCAAATCTGAGATAAACAAATTAATGGATAACTTGGAGAAACTGAAACTAGAAAATGCTGCTTTAATGGAGAGACTGAAAAATGAACAGCTAGGCCAGACAGAAGAGCTGAGTTTAGGTAAGATTGATGATAAGAGGCTGCAACCTGTAGGCACGACAAACCTACTAGCAAGAGTGAATAACTTTGGTTCCTTGGATAGAGCAAACGATGAGAGTGAAGTTTATGAGAACAATAGTTCTGGAGCAAAGCTTCATCAACTACTCGATTCCAGCCCCAGAACTGATGCTGTGGCTGCTGGGTGA	RLRKQAEAEELAIRVQSLTVENMTVKSEINKLMDNLEKLKLENAALMERLKNEQLGQTEELSLGKIDDKRLQPVGTTNLLARVNNFGSLDRANDESEVYENNSSGAKLHQLLDSSPRTDAVAAG*
485	Nicotiana benthamiana	NBEN_188	Niben101Scf30320g00011.1		C	Niben101Scf30320	54700-62386	ATGGATAGGGTGTTCTCAGTGGACGATGACATTGGCGACCACTTCTGGTCGACGCCGCCGACGGCGGACTTAGATGTTGATTCCCCAAACGCTGCCGCCTCCTCCTCCTACTCAAAGATGATGAATCGCAGCTCTTCCGAATGGGCTTTCCAGCGCTTCCTCCAAGAAGCCACCGCCGCAGGTTCCTCCACTTCATCTCATCCTCAGCCACCTACAATGACGGCGTCTTCCTCTTCATCTTCGCACCAAAACGATGTCGTGGAGATCAAGGATGAGAATCTTTTTACTCCTAATTTAAATCCCAGTACGACGTTGAATTCGAAGCCGGCGTCATCGTTTGGCCTCGCACCTCCGCCGAATATTGCCGTTGATTCCGAAGAGTATCAAGCATTCCTGAAA…	MDRVFSVDDDIGDHFWSTPPTADLDVDSPNAAASSSYSKMMNRSSSEWAFQRFLQEATAAGSSTSSHPQPPTMTASSSSSSHQNDVVEIKDENLFTPNLNPSTTLNSKPASSFGLAPPPNIAVDSEEYQAFLKSQLHLACAAVALTRGKSLNPQDSGSTAHDKGSETASAAQSGSHEVAKIQDKDAGGPVGIPSLPPVQKKPVVQVRSTTSGSSREQSDDDEAEGEAETTQGMDPADAKRVRRMLSNRESARRSRRRKQAHLTELETQVSQLRVENSSLLKRLTDISQKYNEAAVDNRVLKADVETLRAKVKMAEETVKRVTGLNPLFQAMSEISSMVMPSYSGSPSDTSADAAVPVQDDPKHHYYQQPPNNHMPTNDPRIQNGMVDVPPIENVQQNPA…
486	Nicotiana benthamiana	NBEN_189	Niben101Scf32851g00038.1		B	Niben101Scf32851	84872-87906	ATGGCAAATCCATTGGTGGCCGATCCACATATGCCGCCGGCGAACGACTTTGCCGATGCCTCGGATCCACCTCTGGGCCAAGGAAACAGCAATAACAGTAGTTACGTCATTTGCGATGAAGCATTCAACAAGGAATTCATGTTTGATGACCTCGACTTTGACTTAGATATCATCTTCCCTCCTGATGATGCTGCCATTCTCAACAACCCCAATTCTCTTGAAACGGGTCAGATTGACCCAAACGGGTTTGGTCAACAGCTGATCCAAGGTTTTAACGATTCTTCTCGGATATTCAAGTCGTCTCCGGAATTACGTCATGTTTCCGTCGCCAGAGGTACGTCCGAGGCGTGTCATAGCTCCGGCGGTCAAACTTCGAGTGGGTCCCTTGTTTTGACTGCA…	MANPLVADPHMPPANDFADASDPPLGQGNSNNSSYVICDEAFNKEFMFDDLDFDLDIIFPPDDAAILNNPNSLETGQIDPNGFGQQLIQGFNDSSRIFKSSPELRHVSVARGTSEACHSSGGQTSSGSLVLTAVSNQNSDVSAYLNVPSPTESNGSNHEDSGNDCKEGSHDSNCPSPESQGSGNCGSHVSEEAFNCPSKSVTSSPIKRGVVVEQNIIKLEEMMNTKDNNKCGSILKRKKVSEEDSNNVSKYQKSNYVAECSKVFNSEGGDEKRKARLMRNRESAQLSRQRKKHYVEELEDKVRTMHSTIQDLNAKISYIMSENATLRSQMGPVPSQMPPPPPGMFPVMYPWMPCAPPYMVKPQGSQVPLVPIPRLKPQAAAPAPKGSKKVEIKKTEMKT…
487	Nicotiana benthamiana	NBEN_190	Niben101Scf38945g00001.1		E	Niben101Scf38945	1-2778	ATGACACCAAATTGGCCTGATTTTTCACATCATCAAAAAATAGACATCACCACAACTACAGCAATTCACAACCCTTCATGGGTAGACGAATTCCTCGACTTCTCGTCGACGAAACGAGGTTCACATCGGAGATCTATTAGTGATTCAATAGCTTTTCTTGAAGCTCCAATGGTTGAAGAATGCAGAAGGCTATCAACTCCAGGAAAAACAACTGGTTCAGAATTTGAAAGATTTGACGATGAACAACTCATGTCAATGTTTAACGATGATATTGCCAATCCTTCGTCGCCTTCGGACAATAACAGCATTAATGAAGAAAAGAAAATGAGTACAATAATCTCCACTGATGACCAGGTAACGCAACAGCAACAACAGCAGCAGCAGCTTAAGACTGAACCT…	MTPNWPDFSHHQKIDITTTTAIHNPSWVDEFLDFSSTKRGSHRRSISDSIAFLEAPMVEECRRLSTPGKTTGSEFERFDDEQLMSMFNDDIANPSSPSDNNSINEEKKMSTIISTDDQVTQQQQQQQQLKTEPEEVESSCKSDEQTASDQHATADNNSSGKIVDPKRIKRILANRQSAQRSRVRKLQYISELERSVTTLQAEVSVLSPRVAFLDHQRLVLNVDNSVLKQRIAALAQDKIFKDAHQEALKREIERLRQIYYQQNLKKMEDEIPTPQSKSQPTAADANASEEKEQLFN*
488	Nicotiana benthamiana	NBEN_191	Niben101Scf39126g00007.1		S	Niben101Scf39126	57576-57869	ATGGTGTGTTCTGGTCGTTTGGCGGACAGCAGCACTGGTGGAGATTGCTGCGTCACTGGTCCGTTGCTGGAGGTTGACGACGGGCTGGTGATGTTGCTGCTCGACGGAGGAAGACGCAGCAGCGTTTCAGGTGAGGGTCGTTTGGACAGGGCTCGGAGGTCACGAATGAGGAAGCAACAGCGATTGAGGGAGTTTATGAGCGAAACAACACAGCTACATAAACAGAACAGTATCTTCCGTGAGAGGATTGATTCTGTCGAGAGAAATCGTAAGAGCACAATTATACGTGATTAA	MVCSGRLADSSTGGDCCVTGPLLEVDDGLVMLLLDGGRRSSVSGEGRLDRARRSRMRKQQRLREFMSETTQLHKQNSIFRERIDSVERNRKSTIIRD*
489	Nicotiana benthamiana	NBEN_192	Niben101Ctg13582g00001.1		S	Niben101Ctg13582	1628-2038	ATGGCTTCTTCTCCTAGTGGAACATCTTCAGGGTCAGAGGATATTCAGCAACTAATGGACCAAAGAAAACGCAAAAGAATGATATCAAACAGGGAATCAGCAAGAAGATCAAGAATGAAGAAGCAAAAGCATTTGTGTGATCTAATGGTTCAAGTGAATCAACTCAAGGATCAAAATAATCAAATTGTAACAAACATAAACATGGTGACTCAGGTTTGTTTGAATGTGGAAGCAGAAAACTCTGTTCTTAGAGCACAAATGGCAGAATTAAGCCACAGGCTTCAGTCCCTAAACGAGATCATAAACTGCATAAACTCAGCAGCAACAATAATTGACGACACAGAGGTTAATGGTGAAGATGATTTCTTGAATCCTTGGAATTTGCTACATGTGAATCAG…	MASSPSGTSSGSEDIQQLMDQRKRKRMISNRESARRSRMKKQKHLCDLMVQVNQLKDQNNQIVTNINMVTQVCLNVEAENSVLRAQMAELSHRLQSLNEIINCINSAATIIDDTEVNGEDDFLNPWNLLHVNQPIMA
490	Nicotiana benthamiana	NBEN_193	Niben101Ctg14368g00003.1		A	Niben101Ctg14368	65-2327	ATGGGAGGGTCTGGAATTAATGGGCAAGAAGTTGGTAGTGTTCAAGGTGGGAATTTACAGAGACAATGCTCTATGACTTTACCGAGGACACTGAGTCATAAGACTGTTGATGAAGTTTGGAGGGATATGTCAAAGGAATATGGTGGTGGAAAAGATGGAAATAGTGTTGGGGTGCCAACAAATTTGCCTCAGAGGCAACAAACTTTAGGGGAGATTACACTTGAGGAGTTCTTAGTTAGAGCTGGTGTTGTGAGAGAAGATGCACAGTTAGCTGCGAAATCGAATAATGTTGGAGGAATCTTTGCTGATTTGTCCTATGCTGGAAATAATACAGGAGTTGGATTTGGATACCAAGAATTGGGAAGTCCTGGAATGAGGGGAGGGATGGTTGGTATTTCT…	MGGSGINGQEVGSVQGGNLQRQCSMTLPRTLSHKTVDEVWRDMSKEYGGGKDGNSVGVPTNLPQRQQTLGEITLEEFLVRAGVVREDAQLAAKSNNVGGIFADLSYAGNNTGVGFGYQELGSPGMRGGMVGISDPALNSNFVQGAALTSGGMGMVGLGAGAVTVATASPAVSSDGLGKSSGDTPFVSPLPYVFNGSIRGRKYSTVEKVVERRQRRMIKNRESAARSRARKQAYTMELEAEVAKLKEENEELQKKQEEMLEMQKNEVMEMMNLQRGAKRRCLRRTETGPW*
491	Petunia inflata	PINF_1	101Scf00049g02037.1		D	Peinf101Scf00049	194359-199559	ATGGGGCTTGAAAGTGATCATAATCAGATTTCATTTGTCAGTGATCATCATCATCAGCAACAATTATATCATAATAATTCTCAGCAGCAGTTACAAAATAATCAAATATCTTTTGGAATGTTACAACAACAGTCATCTTCTTCATCATCAGCCCATATTCCTGGAAACTTCATAAACAAAGAGAATAGTAGTGGAGCTTATGATTTAGGTGAATTAGATCAAGCTCTTTTCCTTTACCTTGATGGTCAAGATCATCCTTCATCAAACCATCATGACCAAAAACAAAATTCTGAGATGAGACCACCGACTCTAAACATTTTTCCATCACAGCCCATGCATGTTGATCCATCATCAACAAAGGTAAATACTGGATTGATTTCTCCAGCTGATAGTGGTTCC…	MGLESDHNQISFVSDHHHQQQLYHNNSQQQLQNNQISFGMLQQQSSSSSSAHIPGNFINKENSSGAYDLGELDQALFLYLDGQDHPSSNHHDQKQNSEMRPPTLNIFPSQPMHVDPSSTKVNTGLISPADSGSKKSSQQSMDLSNPKNDVLCASGPEPKVAKREWNRKGLNSSSEQDAPKTPDHKTLRRLAQNREAARKSRLRKKAYIQQLESSRIRLTQLEQELYRARSQGFHIGSSVLLGDQGLPVNMGSMSSDAAVFDMEYARWLEEHHHLMCELRNAMQEHLPEDELRMYVDNCVTHYNEIMNLKSMLAKSNIILSQIEPLTEQQFVGICGLQQSTQEAEDALSQGLESLNQSLSDTIVSDALACPQNMANYMGQMALAMNKLCTLEGFVRQADN…
492	Petunia inflata	PINF_2	PINF_bZIP.Peinf101Scf00049.1		E	Peinf101Scf00049	470410-481201	ATGGAGGAGGAGATTCTAGCCTTGAAGCAAAATCAGACTTGGGATTTAGTGGCCAAACCCAGGGATAGTAAACCCATATCCGGTAAATGGGTTTATAAATTAAAAACACGCCCTGACGGATCCATCGATCGGTACAAGGCCCGACTGGTAGCTCGAGGATTCTCTCAAGAGTATGGGCTGGATTACGACGAGACATTCAGCCCTGTGGCAAAAATTACTACAGTTCGTGTTTTACTAGCTTTGGCGGCTAGCAAGTCATGGACACTATGGCAGATGGATGTGAAGAATGCCTTCCTTCATGGAGAGTTGGACCGGGAGATATACATGGATCAACCACAAGGGTTTGTGAATAAAGACAACCCTGATTATGTGTGCAAGTTGAAGAAGGCTCTATATGGC…	MEEEILALKQNQTWDLVAKPRDSKPISGKWVYKLKTRPDGSIDRYKARLVARGFSQEYGLDYDETFSPVAKITTVRVLLALAASKSWTLWQMDVKNAFLHGELDREIYMDQPQGFVNKDNPDYVCKLKKALYGLKQAPRAWYGKIAEFLIQSGYQVAHADSSLFVKVRGARLSIILVYVDDLVITGDDIDEIHRSKENLKVRFQMKELGELKHFLGLEVEKTKDGLFLGQQKYARDLLQKYGMSNCKPPSTPMEPNLKLCSYEGKNLEDGTMYRQLVGSLIYLTLTRPDIAFAVGVVSRFMQKPKKPHLEAIKRILSCSIMDSKRQPTVSLSTTEAEYRAGAMAAQESTWLIQLMRDLHQPSEDNVALYCDNLSAIRLAENPVFHARTKHVEVHYHFLR…
493	Petunia inflata	PINF_3	101Scf00049g05029.1		E	Peinf101Scf00049	503563-505772	ATGATGTACAATGGAAAAAGCTCTTTACTGCCTCCTAAAAGCCCGTTTCCTAGCATATCTCCCTCATATGTTGATTATGTTCCTAGTTCTGCTGTCACCCAAAAGCGCATTTCGAAATCCAGAGATGGTTCACACCATCAGCGTACTTCTTCTGAAAGCTGTCTCATAGAGGAGCAACCATCTTGGTTGGATGATCTTCTTAACGAGCCGGAAACTCCTGTACGCAGAGGTGGGCATCGGCGTTCATCTAGTGACTCCGTTACATACTTTGATGCTGCTAACATTGCAAACTTAGATTACATAGCTCAAGATGATAACAAATTCAGAAATATAACTCCTGTCCTTTCCTGGGGATCCGAAGACTTTGATTATTACAAAGATGCTGGGCATGCCACATTT…	MMYNGKSSLLPPKSPFPSISPSYVDYVPSSAVTQKRISKSRDGSHHQRTSSESCLIEEQPSWLDDLLNEPETPVRRGGHRRSSSDSVTYFDAANIANLDYIAQDDNKFRNITPVLSWGSEDFDYYKDAGHATFHVDQISSNRQKSRARSASPNAIPHPRGLPTSRENKIHSLGSSCPPQERERPKSAGSDKQDLVESVPPDQKGSGEKKDSSHSKSSASESDTKRAKQQFAQRSRVRKLQYISELERNVQVLQVEGSEVSAELEFLNQQNLILSMENKALKQRLENLAQEQLIKYCKFLLLYFISYLV*
494	Petunia inflata	PINF_4	101Scf00019g01038.1		A	Peinf101Scf00019	181376-183727	ATGGGATCTTACATGAACTTCAAGAACCTTGCTGACACGCCGATGACAGAGAGCAACGGTGGGAAGTTAGGAAGTGATAATTTTCCTTTAGCTAGACAATCTTCCATATACTCCTTGACATTTGATGAGTTCCAGAGTACTTGTGGTCTTGGAAAAGATCTCGGGTCAATGAATTTGGAAGACCTCTTGAAGAATATTTGGACTGCTGAAGAGTCTCAAGCCTTGGCATCTTCTGCTGGTGTTGGAGATGGGAGTATGGCTGGGGGAAATTTGCAGAGACAAGGTTCTTTGACACTTCCTCGAACGCTTAGTCAGAAAACTGTAGATGATGTATGGAGAGATTTCCAGAAAGAGACGGTTAGTTCAATAGATGGAAGTGATACAGGGAGGTCAAATCTT…	MGSYMNFKNLADTPMTESNGGKLGSDNFPLARQSSIYSLTFDEFQSTCGLGKDLGSMNLEDLLKNIWTAEESQALASSAGVGDGSMAGGNLQRQGSLTLPRTLSQKTVDDVWRDFQKETVSSIDGSDTGRSNLVQRQSTLGEMTLEEFLVRAGVVREDMQPAGDSNDVRFTGGLSQPSTNNNGLNIAFQQPTQTSGMLSNQFAENNMLNMVSTTSSQPQAQQPQPLFSKQMNVAFTSPLHLGNTAQLASPGGRAPIVSMSSPINTTIVQGGGGMHSGVKGLAGLRNGLTPAKRGSPGDQLSPDMIVKSDLDSSSPSPSPYAFTEGGRGRRSCTSLEKVVERRRKRMIKNRESAARSRARKQAYTLELETEVAKLKEINEELQKKQAEFIEMQKNQLMEK…
495	Petunia inflata	PINF_5	101Scf00019g14003.1		S	Peinf101Scf00019	1485182-1486350	ATGGCTTCATCAAGTGGGACATCATCAGGGTCATATACACTTCAGAACTCGGGCTCAGAAGAAGATCTTCAACAATTAATGGATCAGAGGAAGAAGAAGAGGATGATATCGAACCGCGAATCGGCACGAAGATCAAGAATGAGGAAACAGAAGCATTTGGATGATCTTGTGTCCCAATTAGCTCATCTAAGAAAGGAAAATAACCAAATTATGACCACTATGAATGTCACAACCCAACATTATCTCAATATCGAGGGTGAGAACTCAATCTTGAGAGCTCAAGTGGCTGAACTTAGCCACAAACTTGAGTCACTGACACAAATCATCAGTTTCTTGAGTGCCAACAACAGTGCAAATGGTCCAAATGAGCCTATGGCTGATGAGCTAGAATTCGATGGA…	MASSSGTSSGSYTLQNSGSEEDLQQLMDQRKKKRMISNRESARRSRMRKQKHLDDLVSQLAHLRKENNQIMTTMNVTTQHYLNIEGENSILRAQVAELSHKLESLTQIISFLSANNSANGPNEPMADELEFDGECSDRIMMTITASMQINQRCV*
496	Petunia inflata	PINF_6	101Scf00019g18019.1		I	Peinf101Scf00019	1858318-1861209	ATGGGGGGTGAAAGTGATGAAGCTAATGCCGATATGATGCGGAGACTTCAATCATCGTTCGGGACATCATCTTCGAAACACCAACCTATATTGACAAATCAACTTGACATACCTCAGTTGTCTACTTCCCAGTTTCATGGTCAAATGAGACAGTTTTCTCCGAACTTTGGTGGTGAAAATAGTACTAGAAGGGCTGGTTTATCGCCTTCTCACCCACAAATGCCTCCTATTTCGCCGTATTCTCATATTCCAGTAAGCAGGCCAACGAGTCATCAACCTGGTATGCAGAGTTTTACTACTCAAGGGCCATCACATTCGCGATCGTTATCACAATCATCATTTTTTTCACTTGATTCCTTGCCACCCCTAAGCCCTTCACCATATAAGGAAGTCCCCTCT…	MGGESDEANADMMRRLQSSFGTSSSKHQPILTNQLDIPQLSTSQFHGQMRQFSPNFGGENSTRRAGLSPSHPQMPPISPYSHIPVSRPTSHQPGMQSFTTQGPSHSRSLSQSSFFSLDSLPPLSPSPYKEVPSTFISDPVAPDVSMEDRDGNSHSSLPPSPYSRCNSSRVGESLPPRKAHRRSNSDIPFGFSNIIQSSPPLAPSRSPGALERSVPSRDFSGGKPVQLVKREACWDKRNENNAEGMGERKSEGEVVDDLFNAYMNLDNIEALNSSGTDEKHGIENREDLDSRASGTKTNGCDSSDNEATSSVNDSGSSMPTLGTSSSIEKREGIKRSAGGDIAPTVRHYRSVSMDSFMGKLNFADESPRLPPSPGPHPGQLSPTNSLDANSDSFSLEFGN…
497	Petunia inflata	PINF_7	101Scf00015g05002.1		S	Peinf101Scf00015	509161-510787	ATGTCATCTTTAAGGCAGAGTGGTAGTAGTACTTCAGCATCAGAAGGTGACCAGAGATATGCAGGCATGGATGAAAAGAAGAGAAAAAGGATGATTTCTAATAGGGAATCAGCGAGGCGATCTAGGATGAGGAAGCAAAATCTTGCACAAGAATTAACCGAGGAAGTCAGTAGATTACAAGCTGCGAATAGAACCATTGTGGATAAGATTGAAGAGACAACAGAAAGATTGACAATTTACACTGCTCAGAATAATGTGTTGAGGGCACAAGAAATGGAGTTGACCGATAGGCTAAAGTCTCTCAACGATTTGATTGAACATAGCGGCGATGATAGGTGGATCAAGTATTGGTCCATTCATGGTATTGCATTGACAAGTTTAGTGAACATAATCGCTGCT…	MSSLRQSGSSTSASEGDQRYAGMDEKKRKRMISNRESARRSRMRKQNLAQELTEEVSRLQAANRTIVDKIEETTERLTIYTAQNNVLRAQEMELTDRLKSLNDLIEHSGDDRWIKYWSIHGIALTSLVNIIAAFFDLCCS*
498	Petunia inflata	PINF_8	101Scf00122g03026.1		G	Peinf101Scf00122	362930-366770	ATGGGAAACAGTGAGGACGTGAAATCTTGTAAGGCTGAGAAATCATCTTCGGCTGCACCAGACCAGAGCAATATCCATGTCTATCCTGATTGGGCGGCTTTGCAGGCATATTATGGTCCTCGAGTAGCTGTACCTCCATTTGTTAATTCTGCCACTGCACCTGGTCATGCTCCTCATCCCTATATGTGGGGACCACTGCAGCCTATGATTCCACCATATGGTGCACCATATGCAGGAATTTATGCACATGGTGGTGTTTATGCACATCCTGGAGTTCCTATTGTATCTCGTCCTCCGGGTCACGAAATGACATCACCTCCTGCTGTCAGCCAAACCATGGATGCTGCTTCATTGAGTATGGATACTTCTGGCAAGTCTTCGAGGAGTACTAACCAAGGC…	MGNSEDVKSCKAEKSSSAAPDQSNIHVYPDWAALQAYYGPRVAVPPFVNSATAPGHAPHPYMWGPLQPMIPPYGAPYAGIYAHGGVYAHPGVPIVSRPPGHEMTSPPAVSQTMDAASLSMDTSGKSSRSTNQGLMSKLKGFNALGMSIGNCSVDNGDGSDHGTTQSGQEGSSDGSNMHTAGVGENSKKRSRETTPNNSGQGSPQPTGEVNGASEKKTTVAVSPGNTAEKAAKTVFSPSMTATLELRSPAGALVKASPTNVSRIGPAVQDEPWLQNERELKREKRKQSNRESARRSRLRKQAEAEELAIRVQSLTSENLALKSEINKFNENSEKLKLENAALLERLKNKQPGQTEEVTIGKIDDKRPQPVSTADLLARVNNSGPLDRTNDDGEVHENNTS…
499	Petunia inflata	PINF_9	101Scf00073g10001.1		S	Peinf101Scf00073	1001768-1002211	ATGGCTTCTCTTAGTGGAACATCTTCAGGGTCGGATGATATTCAACAACTAATGGACCAAAGGAAACGCAAAAGAATGATATCAAATAAGGAATCAGCAAGAAGATCAAGAATGAGAAAGCAAAAGCATGTAAATGATTTAACGGTTCAAGTGAATCAACTCAAGGATCAAAACAACCAAATTTTAACAAACATAAACATGGTAACTCAGGCTTATTTGAACGTGGAAGCAGAGAACTCTATTCTAAAAGCTCAAATGGCAGAGTTAAGCCACAGGCTTAGGTCTCTGAACGAGATTATAAACTGCTTAAACTCGACAAATTATGCAGCAACAACAGTTGAGGACCCAGAGGTTAATTGTGAAGATGATTTCTTGAATCCTTGGAATTTGTTACACGTG…	MASLSGTSSGSDDIQQLMDQRKRKRMISNKESARRSRMRKQKHVNDLTVQVNQLKDQNNQILTNINMVTQAYLNVEAENSILKAQMAELSHRLRSLNEIINCLNSTNYAATTVEDPEVNCEDDFLNPWNLLHVNQPIMASAYAFNMY*
500	Petunia inflata	PINF_10	PINF_bZIP.Peinf101Scf00032.1		D	Peinf101Scf00032	2943143-2964731	ATGGCTAGTACAATTGGTACACAAGGCAATAGGAGTGGTACTACTGGGATGCCAAGTTTCATTTCTCAGATACCAGCTTCGAATCCCATGGGCACAGAAGGGAACAATAGAAATACTTCTCGAATGTCTGAATTTGGGGTGCTTGAGCAATATCTTGGATTCCGTATTGGAGATGGTGCTAATGTTAATGGAAGTCCACTGTTTAATTCAACATCTGCAACTAATCCAGCAGCGGGTCTTGATGTCTCTGGAACCATCAATAAGACTTTAGCTCCTTCAAATACAAGTTTTTCTGCTGCTATTCCAGTATCTCAAACATTACAACTGCAGAAGGGGCCGCAAGCAAATCTAGTTTCTAGATTTGGTACTCATCATGAGAATTGGGGAGAGTCCAACATG…	MASTIGTQGNRSGTTGMPSFISQIPASNPMGTEGNNRNTSRMSEFGVLEQYLGFRIGDGANVNGSPLFNSTSATNPAAGLDVSGTINKTLAPSNTSFSAAIPVSQTLQLQKGPQANLVSRFGTHHENWGESNMADSSSRTDTSNDMDGDDKNQRIETGQSGGIAASDSSDKSKEKVLDQKSLRRLAQNREAARKSRLRKKAYVQQLENSRLKLSQLEQELQRARQQGKYISNIGDQSNGVGANWSLAFDAEYSRWLEEQNKRINELRTAVNSHASDAELRSIVDNVTVHFDEVFRVKGNAAKADVFHVLSGMWKTPAERCFMWIGGFRPSELLKLLVNQLEPLTEQQLAGIYNLQQSSHQAEDALSQGMEALQQSLAETLANGSPAPEGSSGDVANYMG…
501	Petunia inflata	PINF_11	101Scf00041g08002.1		S	Peinf101Scf00041	800207-801125	ATGCAACCCAGTGATGTTACTGAACTCTATTACCTACTCCCTTCAAATAACCAACCTCAACACCCTTCTCAATTCAACTCGAACTATGATAACTACACATCCACATTTATTCAGTCGAGCCGAATCTCTAGTCCCTTGCATAGTCTTCAGATCGGTCCTCCAATTCAAGAAATCAACCCACAAACAAATTATTTTTTGAACTGCAACTATTCAACGTGTGATGAAACAGATGAGCAATTACTGACTTTAATAAATGAAAGGAAACAAAGAAGAATGATATCTAATAGAGAGTCCGCACGGCGATCACGCATGCGCAAGCAGAAGCATTTGGATGAACTTTGGTCACAGGTTATTTGGCTACGGAATGAGAATCACCAGCTCCTGAACAAACTTAATGAT…	MQPSDVTELYYLLPSNNQPQHPSQFNSNYDNYTSTFIQSSRISSPLHSLQIGPPIQEINPQTNYFLNCNYSTCDETDEQLLTLINERKQRRMISNRESARRSRMRKQKHLDELWSQVIWLRNENHQLLNKLNDVSESHDQALEENTKLKEETSELRQMVTNMQLMNSSNYPCLRDNFDDDEPCSGSSQNE*
502	Petunia inflata	PINF_12	101Scf00087g11014.1		I	Peinf101Scf00087	1185669-1196868	ATGGATAAGGATAAGTCTTCAAACCATGGTGGTGGTTTATTGCCTCCGTCAGGAAGTGGGAGGTACTCATTATTTTCACCTCCTGGTGTAAAATCAGAGCCAAATTTGCCTCCATTAGGACCTCCTGGAAATAGTTCAGATCAATCGGGACATTTTGATTCGAGCCGTTTTAGTCATGATATCAGTCGAATGCCTGATAACCCCCCTAAGAATTTGGGTCATAGACGTGCCCACTCCGAGATTCTTACTCTTCCTGATGATATTAGTTTCGATAGTGATCTTGGAGTTGTTGGTGGGCTGGATGGTCCATCTCTATCCGATGAGACTGAGGAGGATTTCTTCTCTATGTACCTTGACATGGATAAGTTTAATTCGTCGTCAGCAACTTCTACATTTCAA…	MDKDKSSNHGGGLLPPSGSGRYSLFSPPGVKSEPNLPPLGPPGNSSDQSGHFDSSRFSHDISRMPDNPPKNLGHRRAHSEILTLPDDISFDSDLGVVGGLDGPSLSDETEEDFFSMYLDMDKFNSSSATSTFQVGESSSSAAAASGTENVAPVIREKPRIRHQHSQSMDGSTTIKPEMLTSGAEEPSPADAKKSMSAAKLAELALVDPKRAKRIWANRQSAARSKERKMRYIAELERKLQALQTDATTLSAQLTLLQRDTNGMTAENSELKLRLQTMEQQVHLQDALNDALKEEIQHLKVLTGQGGIVNGGAMLNFPTTFGGNQQFFSNNQAMHTLLTTQQLQQLQIHSHKQQHQFQHHQLHQIQQQQQQDQQLQQAGDIKLRSSFSSAQNDNASDISS…
503	Petunia inflata	PINF_13	101Scf00146g04031.1		C	Peinf101Scf00146	386189-392407	ATGGAGAAGAAAATGGCAAACTTTGCTAGTAGAGACATGAAGAAAAGCCCTTCTTTATTGGCTTTGGAGGAGTACTTGAATCACAGCAGAATTTATGGAGAAGATGGGAGACTTATTGGTCATGATATGGTTAATCCAAAAACTGGTGATCATGGTTTTGGAGGCAGTGATCATCATAAAATTACCAGTAATAATAACATTAATCATCTTGACAACAATATTAACGTTCATGCTCAACTTTTTGGTGATATTTGTTCAGTTGCTCCTTCATTTACTATGAGAAATCAGGAGATAATAAATGATTTCTCCAACTGTGCACTGGCAGACAAACCTCAATGGTCTCCAAACCCTACTACAAAGCAGTCAAGTATTTCTGCTACTGTGGATTCACAATCTTCA…	MEKKMANFASRDMKKSPSLLALEEYLNHSRIYGEDGRLIGHDMVNPKTGDHGFGGSDHHKITSNNNINHLDNNINVHAQLFGDICSVAPSFTMRNQEIINDFSNCALADKPQWSPNPTTKQSSISATVDSQSSICAGSPTPTIIMPKVRDNQAMGATSGSYSDDDDLEGEVGPCEQSMEPMDIKRIRRQASNRESARRSRRRKQAHLADLETQVEQYRGENDTLFKQLADATQQYKDALTNNRVLKSDVEALRAKNYLNTPQSLGTNNASMCRLDNVSPTITVPGEDSWGTISSQNPMIGAENNVNNALINRNFKNGAMSDAVSCVSDVWSWESHVASNSK*
504	Petunia inflata	PINF_14	PINF_bZIP.Peinf101Scf00146.1		G	Peinf101Scf00146	1729050-1736990	ATGGGTAGTAGTGAGATGGATAAATCCTCAAAGGAGGCAAAGGAAGCAAAGGAATCAAAGACTCCAAATTCACAGGAGCAGGCTTCTACCACTACAGCTGGCTCAATTAATCCAGATTGGTCTGGCTTTCAGGCATATTCTCCTATGCCTCCACATGGTTACATGGCATCAAGTCCTCAAGGACACCCTTATATGTGGGGAGTTCAGCAATTTATGCCACCCTATGGTACTCCACCACATCCATACGTTGCAATGTATCCCCATGGGGGTATATATGCTCATCCATCTATGCCTCCGGGATCTTACCCCTTCAGCCCTTTTGCAATGCCTTCCCCAAATGGCATTGCTGAAGCTGCAGTTAGCAACGCTGGCAACTCTGAAGTAGATGGTAAGTCACCT…	MGSSEMDKSSKEAKEAKESKTPNSQEQASTTTAGSINPDWSGFQAYSPMPPHGYMASSPQGHPYMWGVQQFMPPYGTPPHPYVAMYPHGGIYAHPSMPPGSYPFSPFAMPSPNGIAEAAVSNAGNSEVDGKSPEGKEKLPIKRSRGSLGSLNMITGKNNGPDKTTRASANGAYSKSAESGSEGSSEGSDANSQNESPMNSGGRQDSADTSQNGNAAHGSQSGGSAPHSMINQTMTIAPMTAAGAAGVPGPTTNLNIGMDYWGAATSASIPAIHGNVPSAPVTGGLVTAGSRDSIQSQMWVQDERELKRQRRKQSNRESARRSRLRKQAECDELAQRAEVLKEENASLRAEVNRIRTEYEQLLAQNVSLKERLGDVPVEDDPRTSRDQLLGKKAQHSSQT…
505	Petunia inflata	PINF_15	101Scf00167g06015.1		A	Peinf101Scf00167	682113-685177	ATGGGGAGTAATTTTCATTTCAAGAACTTTGGTAATGAGCCACCAGGGGAGGGTGGAAGTAGTGGCGGTGGGAAGCAGCTTGGGAACTTTCAGTTGCCAAGGCAGCCGTCAATTTATTCGTTAACGTTTGATGAGTTCCTGAGCACAACGGGAGGGACTGGAAAGGATTTTGGGTCAATGAACATGGATGAGTTGCTAAAGAACATATGGAATGCTGAGGAGAGTCAAACTGTGGGAGGGTCCGGGATTGTTGGGCAAGAAGTTGGTGGTCAAGGGCCTCAAGGCGGGTATTTGCAGAGGCAAGGGTCTTTGACTTTACCTAGGACACTGAGTCAAAAGACAGTTGATGAAGTTTGGAAGGATATGTCAAAGGAGTATGGTGGTGGAACTGGAAAGGAT…	MGSNFHFKNFGNEPPGEGGSSGGGKQLGNFQLPRQPSIYSLTFDEFLSTTGGTGKDFGSMNMDELLKNIWNAEESQTVGGSGIVGQEVGGQGPQGGYLQRQGSLTLPRTLSQKTVDEVWKDMSKEYGGGTGKDGNSSVPVSSNLPQRQPTLGEITLEEFLVRAGVVREDAQLAAKSNNAAGIFADLAYGNNTGIGFGYQQGNRNTGLMAGSIPDKNGENGIQSANLPLNVNGVRSTQQQLRTQQLQQQQQPQQQQPQQQQTLFPKQPGLAYGAPMTIPNNGQLGSPGMRAGMVGISDPALNTNFVQGAALTVGGMSMVGLGAGGVTVAAVSPAVSSDGLGKSNGDTPSVSPIPYVFNGGIRGRKYSTVEKVVERRQRRMIKNRESAARSRARKQAYTME…
506	Petunia inflata	PINF_16	PINF_bZIP.Peinf101Scf00167.1		A	Peinf101Scf00167	859832-862299	ATGAAACCTAGCCGACTGCTGCTAGTTATGTCATTATTATGGAAGGTTCTTGTGGGCATATCCTCAGCCAAACATGGACATTCAAGGGACTCTTGTTCAATAATTGCAATGAATATGAGAGGGAAATCAAATATACCATCTCCACAAAATCTAAGTTGCTCGGACACCGGTACGGGTGTCCGACACGGGTGCGGATCTAGAGACACGGGTGCGGCACCAAAAGTGCCGTGTCCGAGCAACTTAGCACAAAATGCTCTAGGGAACTTTTGTTGGGCTGCATTTGCTTCTCTCCATGCAAACCAGTCAAAGGATTTTAATGACTTCGTTAACTTGCTAAGAAGTGCATTAAAGGACAAGTCTGTAGACATTGGTAATGCAAGCATTGACGATATTACATCT…	MKPSRLLLVMSLLWKVLVGISSAKHGHSRDSCSIIAMNMRGKSNIPSPQNLSCSDTGTGVRHGCGSRDTGAAPKVPCPSNLAQNALGNFCWAAFASLHANQSKDFNDFVNLLRSALKDKSVDIGNASIDDITSLLLYRGTRVAHNACQNDDIDTYSFSSWCRFPWYEVDFGWGKPFWVRTAGFPSGVVILIDTKNGDGIEAWVNLKENGMVEFERDPELVDMKNNLPAVSSDRLGKSNGDTPSVSPIPYVFNGGIRGRKYSTVEKVVERRQRRMIKNRESAARSRARKQEEMLEMQKNQVMEMMNLQRGAKRQCLRRTQTGPW*
507	Petunia inflata	PINF_17	101Scf00255g02026.1		A	Peinf101Scf00255	206756-210965	ATGGCGTCAAAGGTGATGCCGCCTTCTAATTCGGATCATCATTCACAAAACCCACCTTCTAAATCTGATCATCCTTCTAGAACCTTCACTCCCTCTTCTTCTAATTCTTCTTCTATGAATATGGATGAAATTCNTCCCTCTTCTTCTAATTCTTCTTCTATGAATATGGATGAAATTCTCAACACCATTTATAGCTCTGATCATACTGATCCTTTTGTTTCCAACACCACCACTGCCGCCGTAGGCGGCGGAGGTGGTGGTGGTGGTGATGTGGGACCCAGTTCCAAGACTGTTGATGAGGTGTGGAGGGAGATTGTTGCAGGTGGGGGTGGTGGAGGTGGGGGTGGTAGGGGGGAGCCAGAGATGACTTTGGAGGATTTTTTAACCAAAGCTGGTGCT…	MASKVMPPSNSDHHSQNPPSKSDHPSRTFTPSSSNSSSMNMDEIXPSSSNSSSMNMDEILNTIYSSDHTDPFVSNTTTAAVGGGGGGGGDVGPSSKTVDEVWREIVAGGGGGGGGGRGEPEMTLEDFLTKAGAVTEEDVRAPPSTAATTVAPMAAGGGFVVDNMMGTGNCQFPVAMQNGPPGGGGYGGMEPPPPPHMGYGNGGVVSIGGGGSSGSGSGRGKRRSTVEELPLDKATQQKQRRMIKNRESAARSRERKQAYTVELESLVTQLEEENAKLLKEENLFVGIMQKEKNKERLKQIMENRIPVVEKRRPARVLRRVQSMSW*
508	Petunia inflata	PINF_18	101Scf00278g02016.1		G	Peinf101Scf00278	235807-239671	ATGGGAAACAGTGAGGACGGGAAATCCTCTAAGCCTGAGAAATCATCTTCGCCTGCACCAGACCAGAGCAGTCTCCATCTCTATCCTGATTGGGCGGCAATGCAGGCATATTATGGTCCTCGAGTAGCTGTACCTGCATATTTCAATTCAGCTGTTGCACCTGGTCATACCCCTCACCCTTATATGTGGGGTCCACAGCCTATGATACCACCTTATGGTGCACCATATGCGGCAATATATGCTCATGGTGGTGTCTATGCACATCCTGGAGTTCCAATTGGATCTCACCCTCCAGGTCAAGGGATGACGACATCTCCTGCTGTCAGCCAAGCCATGGATGGTGCTTCTTTGAGTTTGGATACATCTGCTAAGTCTTCAGGGAATTCTGATCGAGGTTTG…	MGNSEDGKSSKPEKSSSPAPDQSSLHLYPDWAAMQAYYGPRVAVPAYFNSAVAPGHTPHPYMWGPQPMIPPYGAPYAAIYAHGGVYAHPGVPIGSHPPGQGMTTSPAVSQAMDGASLSLDTSAKSSGNSDRGLTTKLKEFEGLSMSLGNGCADSVEGGTDHGHSQSEETEGSTDGSDTNAAGVCERTADCKSHSRRCQPTGKGNDDSEKAIVAVSPGKVAEKVMGTVLSPGTTTLEMRNPVSHVKTSPTNVSQLSPTLPNESWIQNEREMKREKRKQSNRESARRSRLRKQAEAEELAIRVQSLTAENLTLKSDINKLMENSEKLKLENAALMERMKNGELGKREEVSLGKIDDKRLQPIGTADLLARVNNSGSLDTTNEDGEVYAKNSSGAKLRQLLD…
509	Petunia inflata	PINF_19	PINF_bZIP.Peinf101Scf00337.1		S	Peinf101Scf00337	73049-73708	ATGTTGTCAACTTTTCCGGCTACTACATTTTCCTCCGATGGTCTTTTTCCAAATTTGTTCCAAACATATGACACCGGTTTTACTCCATGGGACACTATTGAACCGGCTTTTTTATTTCCACAAGAAATAGATCAAGAACCGGTTTGTTCACCCAAACAATCCACACCACCCCCTGAAACGGTTCTTTCTAACTCCGGTTCAGGGTCTGATGACTCTAAACCGGATTCATTTCATTGTAGTTCCGGTTCAGATGAACCGGACCGGAACAATAACAATTATATCAACTCGAACTGCGGTTCGAAACGGCCACGGATGACACCGAACCGGGACGTAGACGAACGAAAGAAACGTCGAATGGTGTCGAACCGGGAATCAGCGAGGCGATCACGCATGCGAAAG…	MLSTFPATTFSSDGLFPNLFQTYDTGFTPWDTIEPAFLFPQEIDQEPVCSPKQSTPPPETVLSNSGSGSDDSKPDSFHCSSGSDEPDRNNNNYINSNCGSKRPRMTPNRDVDERKKRRMVSNRESARRSRMRKQQHLENLRNQVNRSKLGNRELMNRVRFMTHQVQLVQCDNERLRTDSAVLRQRLEDIRQILISRQLQQQFSYHSAWACNNMALQRPQ*
510	Petunia inflata	PINF_20	101Scf00339g00010.1		I	Peinf101Scf00339	76050-80379	ATGCAAGATCCGTCAAATCCAAACAACTCCAAAACGCCGTCGTTTACATCCACATTTCGTCCACCTCATCACCGACGAGCTCACTCGGAAGTAAACTTCCGGTTACCCGAAGATCTAGATCTAGGATCCGACCCGTTTGATGGATCCGGTACCGGAAGTTTCGAAGAAATCGGATCCGAAGATGATTTCTTCTCTACGTATATGGATATTGAAAAACTCGGGTCCGGATCTAACCCGAATGATATATCCGGGTTCAATAATAATGCTGGTGGAGGAGGAAGTAGTGGACACGTGGCGGATGGAGGAGTAATGAGGCCACGTCATAGGCATAGTAATTCAGTGGATAGTTCGAGTTTGTTGTTAAGTGAAAGTATTGAAGCTAAAAAAGCTATGGCTCCT…	MQDPSNPNNSKTPSFTSTFRPPHHRRAHSEVNFRLPEDLDLGSDPFDGSGTGSFEEIGSEDDFFSTYMDIEKLGSGSNPNDISGFNNNAGGGGSSGHVADGGVMRPRHRHSNSVDSSSLLLSESIEAKKAMAPDKLAELWTIDPKRAKRILANRQSASRSKERKARYITELERKVQTLQTEATTLSAQLTLFQRDTTQFTNENTELKLRLQAMAQQAQLRDALNEALKQEVERLRMATGEMSSSSDAYNLGMQHIPYNQSAFFSHQPQSGPSESQNIQMQQFQSLQDSLLTPHRRLLSGHQALPDTMQQDPLGRFQGLDIGGRGMHLVKTEAPSISASESSSTL*
511	Petunia inflata	PINF_21	101Scf00359g05001.1		S	Peinf101Scf00359	492484-493026	ATGCAATCTACTGATGTCACAGACTATTATTACCTACTTCCTTCAAACCCAACTCAATTCCCATCTCAATCCTGTGCTAACTATAACTCATCCACATTTCAGATAAACAGGCTCTTGAATCCTCTGTATCAACTTCAGATCACTCCTCAAGTTCAAGAACTTAATCCACAATTAACATGTTTCAACAGTAACTCTACATCTGATGAAGCTGATGAGCAACAGATGAGTCTAATCAATGAAAGGAAACAAAGAAGAATGATATCTAATAGAGAGTCTGCACGGAGATCACGCATGCGCAAGCAGAGGCACTTAGATGAGCTTTGGGCACAAGTTGTTTGGCTCCGAAATGAGAATCACCAGCTCCTTGAGAAACTAAACCATGCTTCGGAGAGCCATGAT…	MQSTDVTDYYYLLPSNPTQFPSQSCANYNSSTFQINRLLNPLYQLQITPQVQELNPQLTCFNSNSTSDEADEQQMSLINERKQRRMISNRESARRSRMRKQRHLDELWAQVVWLRNENHQLLEKLNHASESHDQTLQENAQLKKEASELRQMITDMHLTSPCPSLRALDDEHCSGLSQNE*
512	Petunia inflata	PINF_22	101Scf00267g09015.1		D	Peinf101Scf00267	916893-925227	ATGGAGAGTCAAAGAATTGGAGACACTGCTAGTTTGTCAGCTGATCACTCAGGACCTTCACACCATCATCATCACAACATGTCTTATGCACTTCTTCGTGGCCTAAATCCTACCAACACAACAAGCTTCATGTATCATTCCACTCCAAATAATCAAGAACCACCTGCTTTCGATTTTGGAGAACTTGAAGAAGCAATTGTGCTACAAGGAGTTAAGATGAGCAATGATGAAACTAAAGCATCTTTATATGCAGCCACAAACAGACCTGCTGCAACTCTGGAGATGTTCCCTTCTTGGCCTACGAGATTCCATCACACCCCTAGAGGAAGTTCAAAATCAGGAGAAGAGAGTACTGATTCAGGTTCAGCACTAAACACTTTTTCAAGCAGAGGTGAACAC…	MESQRIGDTASLSADHSGPSHHHHHNMSYALLRGLNPTNTTSFMYHSTPNNQEPPAFDFGELEEAIVLQGVKMSNDETKASLYAATNRPAATLEMFPSWPTRFHHTPRGSSKSGEESTDSGSALNTFSSRGEHHLEPESPISRKQSSDHHQTIEQNQQLQIPQLQLPQQHQQLQEMASDSPRTRVSNSTEPTSKPNYEKRKGAGSTSDRVTDAKTLRRLAQNREAARKSRLRKKGLFMGGGAAANSNISSGAAIFDMEYSRWLDDDQRHIAELRTALQAHLGDADLRVIVDGYIAHYDEIFRLKGVAAKSDVFHLITGIWTTPAERCFLWMGGFRPSELIKMLIAQLDPLTQQQVVGIYSLQQSSQQAEEALSQGLEQLQQSLVETVASASVNDGMHHM…
[truncated: 424 more rows]

## Sheet: Supplementary Table S3
Table S3. Motif information
Motif	Motif length (aa)	Motif logo	Position	Number of genes containing motif
[1]	32		10	892
[2]	11		9	733
[3]	26		11	446
[4]	10		4	171
[5]	10		4	173
[6]	16		_	124
[7]	18		12	126
[8]	16		_	128
[9]	10		16	168
[10]	20		2	106
[11]	14		_	126
[12]	24		7	129
[13]	24		14	131
[14]	23		3	120
[15]	18		11	118
[16]	15		5	152
[17]	29		5	73
[18]	19		_	48
[19]	15		16	154
[20]	19		17	120
[21]	36		_	56
[22]	20		7	60
[23]	13		7	39
[24]	12		11	145
[25]	25		_	98
[26]	43		_	47
[27]	17		6	143
[28]	14		13	125
[truncated: 22 more rows]

## Sheet: Supplementary Table S4
Table S4. Log 2 (fold-change) values of pepper bZIP genes under abiotic stress.
[truncated: 71 more rows]

[truncated: 1 more sheets: Supplementary Table S5]
